# Supplementary material
Source: Research Square preprint supplement (doi:10.21203/rs.3.rs-9589050/v1)
Supplement: Supplementary file 1 [file 2022febdec497c74004e6f7e.xlsx]

## Sheet: Mean_rank
Rank

## Sheet: Integrated_scaled_rank
Rank
