# Supplementary material
Source: Research Square preprint supplement (doi:10.21203/rs.3.rs-9589050/v1)
Supplement: Supplementary file 2 [file 7608909990c3310ba893776a.xlsx]

## Sheet: Gene Regulatory (GR-) Net
TF.ID

## Sheet: Systems Genetics (SG-) Net
source

## Sheet: Unfitered Net
from

## Sheet: Final SD-Net edges
from

## Sheet: Final SD-Net nodes
name
