# Supplementary material
Source: Research Square preprint supplement (doi:10.21203/rs.3.rs-9589050/v1)
Supplement: Supplementary file 3 [file 7c25f64eaebd0e147c4ea1b6.xlsx]

## Sheet: Sequencing_QC
Metric

## Sheet: Alignment_QC
Metric

## Sheet: Peak_QC
Metric

## Sheet: Peak_Summary
Strain

## Sheet: Merged_Peaks
Chromosome

## Sheet: Final_Regions
Peak_ID
