# Supplementary material
Source: Research Square preprint supplement (doi:10.21203/rs.3.rs-9589050/v1)
Supplement: Supplementary file 4 [file 91e4787ebbe92c1ef37e3e77.xlsx]

## Sheet: ATAC_QTL
regionID	region	Annotation	cCRE	gene	lod	chr	pos	ci_lo	ci_hi	bp	bp_lo	bp_hi	BSL_trend	SD_trend	BB_Ctrl	BB_SD	DD_Ctrl	DD_SD	snp	snps
chr1_1.1	chr1:3094969-3095219	Distal Intergenic		Xkr4	3.95999	1	1.499	1.499	50.9458	3010274	3010274	94379159	Significant in baseline	No effect	18	18	13	13	rs31443144	rs31443144;rs6269442;rs32285189;rs258367496;rs32430919;rs36251697;rs30658298;rs51852623;rs31879829;rs36742481;rs6365999;rs13470446;Affy_10344635;rs6376963;rs30847416;rs32759286;rs31625087;rs31716357;rs3677817;rs47937185;rs32140280;rs32096391;rs47493511;rs31190522;rs6298633;rs31362910;rs31878990;rs32186775;rs31868650;rs6360236;rs32740138;rs249962268_D1Mit1;rs30991578;rs32347261;rs36585555;rs304772…
chr1_1.2	chr1:3095219-3095469	Distal Intergenic		Xkr4	3.79746	1	1.499	1.499	93.7613	3010274	3010274	191333382	Significant in baseline	No effect	18	18	13	13	rs31443144	rs31443144;rs6269442;rs32285189;rs258367496;rs32430919;rs36251697;rs30658298;rs51852623;rs31879829;rs36742481;rs6365999;rs13470446;Affy_10344635;rs6376963;rs30847416;rs32759286;rs31625087;rs31716357;rs3677817;rs47937185;rs32140280;rs32096391;rs47493511;rs31190522;rs6298633;rs31362910;rs31878990;rs32186775;rs31868650;rs6360236;rs32740138;rs249962268_D1Mit1;rs30991578;rs32347261;rs36585555;rs304772…
chr1_10042.3	chr1:130848596-130848846	Exon (ENSMUST00000027675.13/18703, exon 7 of 11)		Fcmr	4.18212	2	93.9085	93.2605	94.1649	173549919	173426500	173597301	Significant in baseline	Protected effect	16	16	15	15	rs27644500	rs27621324;rs27644551;rs27644503;rs27644500;rs6384888;rs27644412
chr1_10060.3	chr1:131062238-131062488	Intron (ENSMUST00000016672.10/17164, intron 1 of 9)		Mapkapk2	3.91062	1	61.9643	54.4027	62.6023	132495600	107486168	135170068	Significant in baseline	No effect	19	19	12	12	rs31762723	rs31960226;rs32738873;rs31744083;rs47329570;rs31960159;rs13476045;rs45843892;rs31935680;rs3685919;rs6319405;rs3710646;rs30584583;rs51800183;rs48823920;rs30719160;rs31471077;rs30675648;rs32180662;rs30680977;rs32807094;rs30637341;rs32757674;rs32268077;rs30725178;rs30724278;rs30698282;rs3723088;rs3663708;rs31007558;rs30727085;rs48015801;rs230640887;rs237885247;rs48962291;rs213804272;rs31189732;rs470…
chr1_10065.3	chr1:131074089-131074339	Promoter (1-2kb)	dELS,CTCF-bound	Mapkapk2	3.83548	1	61.4534	56.0625	63.8825	131595730	115951738	138606530	Significant in baseline	No effect	19	19	12	12	rs108035116	rs30675648;rs32180662;rs30680977;rs32807094;rs30637341;rs32757674;rs32268077;rs30725178;rs30724278;rs30698282;rs3723088;rs3663708;rs31007558;rs30727085;rs48015801;rs230640887;rs237885247;rs48962291;rs213804272;rs31189732;rs47085630;rs49565748;rs30561273;rs30785490;rs32612920;rs31573665;rs47328362;rs32769332;rs32013884;rs50349808;rs32811017;rs31348531;rs33889750;rs47026905;rs6263067;rs32558546;rs3…
chr1_10065.4	chr1:131074339-131074589	Promoter (1-2kb)	dELS; dELS,CTCF-bound	Mapkapk2	4.69416	1	61.9643	59.2609	63.8825	132495600	126729134	138606530	Significant in baseline	No effect	19	19	12	12	rs31762723	rs32769332;rs32013884;rs50349808;rs32811017;rs31348531;rs33889750;rs47026905;rs6263067;rs32558546;rs32101230;rs49892902;rs8256197;rs13459051;rs32335588;rs32112067;rs108035116;rs6250833;rs37505705;rs31762723;rs30763126;rs33494411;rs30766381;rs32452440;rs37131139;rs13476119;rs49289788;rs36548506;rs37895110;rs3691222;rs33589350;rs33586240;rs6406033;rs46445754;rs31534627;rs215571652
chr1_10070.1	chr1:131082249-131082499	Intron (ENSMUST00000016672.10/17164, intron 1 of 9)		Mapkapk2	3.80091	7	47.9241	43.6416	55.934	92545195	83633301	114430675	Significant in baseline	Down effect	17	17	14	14	rs32510496	rs31435342;rs31416354;rs31476858;rs32066094;rs6278282;rs31521374;rs37626662;rs31488447;rs32267337;rs6394492;rs32174327;rs31133462;rs31178835;rs32409257;rs32326663;rs31182975;rs31345154;rs32416091;rs31867408;rs32124327;rs31349093;rs31709999;rs32510496;rs31238492;rs31093558;rs4226783;rs31732570;rs36361468;rs32131184;rs31481725;rs51546480;rs13479416;rs31323776;rs31894020;rs31494684;rs31541427;rs3155…
chr1_10073.2	chr1:131088604-131088854	Exon (ENSMUST00000191688.1/ENSMUST00000191688.1, exon 1 of 1)	dELS	Mapkapk2	5.06722	1	60.545	60.4177	61.9643	128589065	128544902	132495600	Significant in baseline	No effect	18	18	13	13	rs8256197	rs49892902;rs8256197;rs13459051;rs32335588;rs32112067;rs108035116;rs6250833;rs37505705;rs31762723
chr1_10107.4	chr1:131187742-131187992	Intron (ENSMUST00000027688.14/54354, intron 2 of 5)		Rassf5	3.95798	4	59.808	54.1288	60.3767	138255627	130818477	139752706	No baseline effect	Protected effect	16	16	13	13	rs31759337	rs48843456;rs31971961;rs27539745;rs224786516;rs31846085;rs50587016;UNC040295831;rs32415293;rs3664871;rs27542952;rs32101803;rs45715781;rs27574272;rs27547213;rs28291789;rs32928597;rs50928477;rs27623046;rs27607561;rs32173419;rs27607425;rs32989424;rs27624576;rs13478002;rs27592710;rs108329274;rs27562018;rs4224861;rs4224864;rs49216620;rs31759337;rs49096475;rs32814248;rs27584118;rs32083983;rs230956126;r…
chr1_10111.3	chr1:131196166-131196416	Intron (ENSMUST00000027688.14/54354, intron 2 of 5)		Rassf5	3.45173	17	9.97	7.95848	17.2339	21686210	10720847	35530170	Significant in baseline	Protected effect	18	18	12	12	rs52562350	rs33397317;rs29500073;rs33393386;rs46339515;rs33183615;rs49702852;rs33169172;rs108375027;rs33518122;rs3662820;rs33637088;rs33220795;rs30924502;rs29499971;rs3654149;rs51863865;rs6181074;rs33314464;rs16783619;rs31589117;rs52562350;rs31862018;rs31423591;rs32518416;rs32170136;rs33864009;rs33668338;rs33570052;rs33641175;rs51376412;rs52488232;rs3659741;rs13459150;rs33464875;rs29536256;rs33317604;rs3313…
chr1_10131.2	chr1:131230113-131230363	Intron (ENSMUST00000027688.14/54354, intron 1 of 5)		Rassf5	4.435	6	2.36573	1.342	4.80069	6233941	3266392	15421102	Significant in baseline	No effect	18	18	13	13	rs30450019	rs32426984;rs30759941;rs13478602;rs30654669;rs6180149;rs32448234;rs29924446;rs30754715;rs30860624;rs30715633;rs30223468;rs30450019;rs29922474;rs49698565;rs13478617;rs37214208;rs29978844;rs30957887;rs30272308;rs29912091;rs30952145;rs30845880;rs29926568;rs30033882;rs30518301;rs13478632;rs30710547;rs29829269;rs36857136;rs13478638;rs30704977
chr1_10169.5	chr1:131297026-131297276	Promoter (<=1kb)		Srgap2	4.04562	1	62.0915	57.4639	63.1132	132628058	121148291	136537577	Significant in baseline	No effect	20	20	11	11	rs30763126	rs48015801;rs230640887;rs237885247;rs48962291;rs213804272;rs31189732;rs47085630;rs49565748;rs30561273;rs30785490;rs32612920;rs31573665;rs47328362;rs32769332;rs32013884;rs50349808;rs32811017;rs31348531;rs33889750;rs47026905;rs6263067;rs32558546;rs32101230;rs49892902;rs8256197;rs13459051;rs32335588;rs32112067;rs108035116;rs6250833;rs37505705;rs31762723;rs30763126;rs33494411;rs30766381;rs32452440;rs…
chr1_10175.1	chr1:131349123-131349373	Intron (ENSMUST00000097588.8/14270, intron 8 of 22)		Srgap2	4.06174	17	38.97	37.1801	40.1567	70920549	68071682	70920549	Significant in baseline	No effect	17	17	7	7	rs52567611	rs3666819;rs29523449;rs51337662;rs13483086;rs48858029;rs52567611
chr1_10196.2	chr1:131548600-131548850	Distal Intergenic	dELS; dELS,CTCF-bound	Fam72a	3.79266	6	14.4984	13.1516	17.3394	29887367	28715963	34195112	Significant in baseline	No effect	14	14	17	17	rs29650874	rs30764547;rs29605219;rs29618131;rs29650874;rs13478687;rs52571055;rs29973656;rs13478690;rs30718075;rs30114467;rs30162995;rs29966306;rs13478694;rs30468068;rs30319084;rs3678887;rs3693410;rs30654706;rs47901097;rs49265509;rs29960521;rs50136596;rs30318085
chr1_1020.2	chr1:22803351-22803601	Promoter (2-3kb)	dELS	Rims1	4.06085	8	56.2465	55.1964	56.6301	127830309	123289925	128589736	Significant in baseline	No effect	23	23	7	7	rs3697596	rs32862148;rs13480026;rs6400423;gnf08.128.727;rs3697596;rs3699035;rs13480045;rs3716715
chr1_10221.1	chr1:131710192-131710442	Intron (ENSMUST00000129905.1/226421, intron 3 of 3)		Rab7b	8.07386	1	60.9326	60.9326	61.9643	130863937	130863937	132495600	Significant in baseline	No effect	19	19	12	12	rs32335588	rs32335588;rs32112067;rs108035116;rs6250833;rs37505705;rs31762723
chr1_10235.2	chr1:131754854-131755104	Intron (ENSMUST00000049027.9/320718, intron 5 of 20)	pELS	Slc26a9	4.47596	1	61.9643	52.4844	63.8825	132495600	99889934	138606530	Significant in baseline	No effect	19	19	12	12	rs31762723	rs36618375;rs13476012;rs30966514;rs51210174;rs13476025;rs31806216;rs13476030;rs32565357;rs32697536;rs30506144;rs30488981;rs30487561;rs30484039;rs47647099;rs49762567;rs3680216;rs31994637;rs31960226;rs32738873;rs31744083;rs47329570;rs31960159;rs13476045;rs45843892;rs31935680;rs3685919;rs6319405;rs3710646;rs30584583;rs51800183;rs48823920;rs30719160;rs31471077;rs30675648;rs32180662;rs30680977;rs32807…
chr1_10235.3	chr1:131755104-131755354	Intron (ENSMUST00000049027.9/320718, intron 5 of 20)	pELS	Slc26a9	4.16988	1	61.9643	57.9788	63.8825	132495600	121353007	138606530	Significant in baseline	No effect	19	19	12	12	rs31762723	rs237885247;rs48962291;rs213804272;rs31189732;rs47085630;rs49565748;rs30561273;rs30785490;rs32612920;rs31573665;rs47328362;rs32769332;rs32013884;rs50349808;rs32811017;rs31348531;rs33889750;rs47026905;rs6263067;rs32558546;rs32101230;rs49892902;rs8256197;rs13459051;rs32335588;rs32112067;rs108035116;rs6250833;rs37505705;rs31762723;rs30763126;rs33494411;rs30766381;rs32452440;rs37131139;rs13476119;rs4…
chr1_10262.3	chr1:131847454-131847704	3' UTR		Slc41a1	4.11491	12	31.8232	28.1338	32.9903	75295456	69614887	75731217	Significant in baseline	Protected effect	14	14	16	16	rs29187781	rs29165578;rs32231802;rs29491724;rs49357547;rs13481518;rs13481521;rs49391506;Affy_4992472etal;rs29199201;rs6346026;rs29184803;rs29187781;rs29149379;rs29169309;rs13481536;rs13481537
chr1_10277.2	chr1:131970615-131970865	Promoter (<=1kb)	dELS	Slc45a3	3.86291	13	14.742	11.3973	17.7292	42739440	36972100	46973170	Significant in baseline	No effect	13	13	16	16	rs29232093	rs6200652;rs29590965;rs30095056;rs30076920;rs29990564;rs3701164;rs29804781;rs29688501;rs13481774;rs3719241;rs29883684;rs29554601;rs6271232;rs29232093;rs49348611;rs6196305;rs3688207;rs29710001;rs47889179;rs29530113;rs3725387;rs30854176;rs233613258
chr1_10318.1	chr1:132087852-132088102	Distal Intergenic		Mfsd4a	4.13184	1	54.0151	53.2498	55.1699	106835365	105583184	109540731	Significant in baseline	Protected effect	20	20	11	11	rs31994637	rs32697536;rs30506144;rs30488981;rs30487561;rs30484039;rs47647099;rs49762567;rs3680216;rs31994637;rs31960226;rs32738873;rs31744083;rs47329570;rs31960159;rs13476045;rs45843892;rs31935680
chr1_10318.1	chr1:132087852-132088102	Distal Intergenic		Mfsd4a	3.90998	1	59.2609	55.4244	62.2187	126729134	113394307	133168278	Significant in baseline	Protected effect	20	20	11	11	rs32769332	rs30584583;rs51800183;rs48823920;rs30719160;rs31471077;rs30675648;rs32180662;rs30680977;rs32807094;rs30637341;rs32757674;rs32268077;rs30725178;rs30724278;rs30698282;rs3723088;rs3663708;rs31007558;rs30727085;rs48015801;rs230640887;rs237885247;rs48962291;rs213804272;rs31189732;rs47085630;rs49565748;rs30561273;rs30785490;rs32612920;rs31573665;rs47328362;rs32769332;rs32013884;rs50349808;rs32811017;rs…
chr1_10340.5	chr1:132144018-132144268	Distal Intergenic		Cdk18	4.14449	1	17.3385	16.0088	32.0052	33721638	32082234	55127480	Significant in baseline	No effect	18	18	13	13	rs46323879	rs32760971;rs31818207;rs30598074;rs13475795;rs30849932;rs46323879;rs31518908;rs31710287;rs16808053;rs221967485;rs47717565;rs13475808;rs30604008;rs30525912;rs13475810;rs13475816;rs32180312;rs31935537;rs32551229;rs32942136;rs32635513;rs3705697;Affy_10345622;Affy_5433680;rs32988364;rs31528685;rs30611861;rs31574517;rs30868358;rs31440687;rs51951745;rs31449667;rs33132305;rs30551147;rs13475821;rs3636712…
chr1_10365.9	chr1:132211985-132212235	Intron (ENSMUST00000188169.6/213409, intron 1 of 4)		Mir135b	3.50306	11	38.1255	32.3152	43.1094	70557665	64680151	82178599	Significant in baseline	No effect	7	7	23	23	rs26890724	rs26967958;rs51945231;rs29464904;rs29440618;rs3691200;rs49042185;rs29481123;rs3715924;rs28217179;rs3677986;rs26919867;UNC111374186;rs45699714;rs252262383;rs3658906;rs26905479;rs26889925;rs26922589;rs13481087;UNCHS031222;rs26890724;UNCHS031223;UNC19879019;rs28233084;rs28233055;rs47597895;rs29456448;rs26900719;rs29458696;rs29397042;rs6217738;UNCHS031330;UNCHS031336;UNC19910935;rs13481099;rs26920237…
chr1_1039.1	chr1:23141481-23141731	Intron (ENSMUST00000191045.1/ENSMUST00000191045.1, intron 3 of 3)		Ppp1r14bl	3.91292	19	33.7067	30.5383	34.0884	37437992	35618003	37738399	Significant in baseline	No effect	18	18	13	13	rs30771319	rs13483605;rs13483606;rs46794354;rs13483609;rs30498947;UNC190040805;rs3713879;rs30504012;rs30771319;rs30363927;rs13483614;rs30454330;rs37055925;rs3653886
chr1_10420.1	chr1:132376329-132376579	Intron (ENSMUST00000045473.15/68875, intron 2 of 4)		Tmcc2	4.181	4	36.3525	36.2253	37.5298	98691724	96897254	103634906	No baseline effect	No effect	5	5	26	26	rs32346380	rs28138717;rs32671645;rs32346380;rs13477866;rs13477873;rs28181732;rs28186732
chr1_10427.3	chr1:132384042-132384292	Intron (ENSMUST00000045473.15/68875, intron 1 of 4)	dELS	Tmcc2	4.63038	1	66.4935	59.2609	67.9028	145394499	126729134	151271465	Significant in baseline	No effect	22	22	9	9	rs31055515	rs32769332;rs32013884;rs50349808;rs32811017;rs31348531;rs33889750;rs47026905;rs6263067;rs32558546;rs32101230;rs49892902;rs8256197;rs13459051;rs32335588;rs32112067;rs108035116;rs6250833;rs37505705;rs31762723;rs30763126;rs33494411;rs30766381;rs32452440;rs37131139;rs13476119;rs49289788;rs36548506;rs37895110;rs3691222;rs33589350;rs33586240;rs6406033;rs46445754;rs31534627;rs215571652;rs13476137;rs1347…
chr1_10453.2	chr1:132506367-132506617	Promoter (<=1kb)		Tmem81	3.96464	2	88.546	88.1524	89.922	170206904	169891672	170826974	Significant in baseline	No effect	17	17	9	9	rs3148034	rs27628736;rs27628709;rs3148016;rs3148034;rs13476914
chr1_10478.5	chr1:132565802-132566052	3' UTR		Nfasc	3.87959	7	52.659	44.6854	55.4251	107293974	84149847	111707135	Significant in baseline	No effect	17	17	14	14	rs50275558	rs31476858;rs32066094;rs6278282;rs31521374;rs37626662;rs31488447;rs32267337;rs6394492;rs32174327;rs31133462;rs31178835;rs32409257;rs32326663;rs31182975;rs31345154;rs32416091;rs31867408;rs32124327;rs31349093;rs31709999;rs32510496;rs31238492;rs31093558;rs4226783;rs31732570;rs36361468;rs32131184;rs31481725;rs51546480;rs13479416;rs31323776;rs31894020;rs31494684;rs31541427;rs31551122;rs48613317;rs3158…
chr1_10479.2	chr1:132570299-132570549	3' UTR	dELS	Nfasc	4.17693	2	44.9561	41.8699	45.0833	80276774	78100322	80327515	Significant in baseline	No effect	11	11	20	20	rs28302337	rs13476589;rs33691549;rs29674390;rs29556665;rs33548881;rs28016952;rs48292852;rs28015970;rs28324590;UNC020313672;rs28315888;rs28302337;rs33228399
chr1_10486.7	chr1:132588161-132588411	Promoter (1-2kb)		Nfasc	3.96655	6	18.6862	17.3394	19.4574	34507507	34195112	36747332	Significant in baseline	No effect	15	15	16	16	rs13478705	rs30318085;rs30421613;rs30602525;rs13478705;D6Mit268;rs30707684;rs45757075;rs30175616;rs13478714
chr1_10495.1	chr1:132612734-132612984	Intron (ENSMUST00000094569.10/269116, intron 11 of 29)		Nfasc	3.85665	18	24.149	23.4014	27.5149	55966804	54614841	57293890	Significant in baseline	Protected effect	12	12	17	17	rs212872514	rs13483369;rs212872514;rs215803889;rs29671024;rs50884175;UNC180279562;rs51995685;rs13483377;rs30030619;rs13483378
chr1_10538.3	chr1:132705410-132705660	Promoter (1-2kb)		Nfasc	3.79279	1	18.2291	17.4657	20.1595	35995739	34536447	39020746	Significant in baseline	Protected effect	19	19	12	12	rs13475810	rs31710287;rs16808053;rs221967485;rs47717565;rs13475808;rs30604008;rs30525912;rs13475810;rs13475816;rs32180312;rs31935537;rs32551229;rs32942136;rs32635513;rs3705697;Affy_10345622;Affy_5433680;rs32988364;rs31528685;rs30611861;rs31574517;rs30868358
chr1_10541.13	chr1:132711901-132712151	Intron (ENSMUST00000188307.1/269116, intron 1 of 19)		Nfasc	3.75498	11	73.0306	71.7544	74.3451	118139055	116365653	119408952	Significant in baseline	Protected effect	20	20	11	11	rs29447364	rs50315212;rs13481249;rs29471238;rs27013085;rs13481251;rs50045009;rs50083450;rs52151267;rs13481252;rs50730255;rs51797794;D11Mit48;rs29447364;rs46221055;rs45879589;rs27045781;rs6211180
chr1_1056.1	chr1:23411292-23411542	Distal Intergenic		Ogfrl1	3.90425	5	86.611	85.9749	87.7699	146682242	144439345	150597426	Significant in baseline	No effect	11	11	20	20	rs51417856	rs3696754;rs32356963;rs3664423;rs48218991;rs37346509;rs8268086;rs33098228;rs50373720;rs49528261;rs51417856;rs32360916;rs33285057;rs32381987;rs49106962;rs29561707;UT_PChr5_distal
chr1_10561.1	chr1:132758498-132758748	Distal Intergenic	dELS,CTCF-bound	Nfasc	3.90074	9	18.8146	17.7949	20.22	45693319	42985783	47625185	No baseline effect	Protected effect	15	15	16	16	rs29743829	rs46688986;rs30092176;rs30337279;rs30137947;rs32611336;rs29787769;rs32623795;rs3707713;rs30334701;rs50021638;rs36888460;rs29935776;rs29743829;rs29740169;rs29983887;rs50472876;rs29693744;rs29792735;rs48329073;rs52258400;rs33749941;rs29980498;rs32678869;rs32681907;rs32708297;rs30229691;rs29876068;rs46126800
chr1_10579.4	chr1:132836949-132837199	Distal Intergenic		Lrrn2	3.62772	7	48.8167	44.6854	56.5721	95997605	84149847	114699006	Significant in baseline	No effect	18	18	13	13	rs31894020	rs31476858;rs32066094;rs6278282;rs31521374;rs37626662;rs31488447;rs32267337;rs6394492;rs32174327;rs31133462;rs31178835;rs32409257;rs32326663;rs31182975;rs31345154;rs32416091;rs31867408;rs32124327;rs31349093;rs31709999;rs32510496;rs31238492;rs31093558;rs4226783;rs31732570;rs36361468;rs32131184;rs31481725;rs51546480;rs13479416;rs31323776;rs31894020;rs31494684;rs31541427;rs31551122;rs48613317;rs3158…
chr1_10593.4	chr1:132878902-132879152	Promoter (1-2kb)	dELS	Lrrn2	3.89526	3	14.1574	12.0958	15.3122	38521972	36543329	39636183	Significant in baseline	No effect	19	19	12	12	rs51367062	rs30698864;rs3151914;rs3151902;rs29983817;UNCHS008426;rs3151465;UNCHS008443;rs30048108;UNC5057834;rs3141366;rs30082219;rs30089442;rs50091922;rs30801829;rs31523971;rs51367062;rs31525867;rs46477289;rs51901876;rs6274061;rs46594852;rs31313193;rs46436000
chr1_10599.2	chr1:132890180-132890430	Intron (ENSMUST00000027706.3/16980, intron 1 of 1)		Lrrn2	4.26615	X	46.9622	17.7029	49.7038	158300350	58654466	164079038	Significant in baseline	No effect	18	18	13	13	rs13484097	rs13483769;rs29057816;rs29057773;rs29059808;rs29057552;rs13483770;rs48259763;rs31360508;rs232735621;rs29052163;rs29046879;rs33876026;rs31296287;rs13483813;rs29043238;rs29044678;rs29043152;rs31404716;rs3161011;rs3157124;rs33843040;rs13483818;rs238139072;DXMit1;rs31270235;rs13483824;rs29033236;rs29030852;rs29031335;rs31370191;rs13483868;rs29066333;rs47218465;rs29064668;rs29077826;rs260265702;rs1348…
chr1_1064.1	chr1:23792825-23793075	Intron (ENSMUST00000144602.1/280645, intron 2 of 2)	CTCF-only,CTCF-bound	B3gat2	4.014	7	37.473	12.2971	40.5705	71410581	26713260	74340806	Significant in baseline	No effect	20	20	11	11	rs47119834	rs36536360;rs31988344;rs37287696;rs13479163;rs39775784;rs32219787;rs31793211;rs46477628;rs32185835;rs47734376;rs32524656;rs31691249;rs47206075;rs46476185;rs32501401;rs46107184;rs52305240;rs31940507;rs32012050;rs37208863;rs31512362;rs31561779;rs32477373;rs32067315;rs47488275;rs46107226;rs32555260;rs31736746;rs32561437;rs250232227;rs31623270;rs32569368;rs32567376;rs24886524;rs223788707;rs32586510;r…
chr1_10657.2	chr1:133078029-133078279	Exon (ENSMUST00000124934.7/240752, exon 10 of 12)	dELS,CTCF-bound	Pik3c2b	3.96135	1	62.2187	60.0301	66.2371	133168278	128543687	145376780	Significant in baseline	No effect	20	20	11	11	rs30766381	rs32101230;rs49892902;rs8256197;rs13459051;rs32335588;rs32112067;rs108035116;rs6250833;rs37505705;rs31762723;rs30763126;rs33494411;rs30766381;rs32452440;rs37131139;rs13476119;rs49289788;rs36548506;rs37895110;rs3691222;rs33589350;rs33586240;rs6406033;rs46445754;rs31534627;rs215571652;rs13476137;rs13476138;rs49147137;rs107630249;rs3682831;rs13476148;rs31066093;rs31063456
chr1_10657.3	chr1:133078279-133078529	Intron (ENSMUST00000124934.7/240752, intron 10 of 11)	dELS; dELS,CTCF-bound	Pik3c2b	5.83241	1	62.3459	60.9326	63.1132	133975583	130863937	136537577	Significant in baseline	No effect	21	21	10	10	rs37131139	rs32335588;rs32112067;rs108035116;rs6250833;rs37505705;rs31762723;rs30763126;rs33494411;rs30766381;rs32452440;rs37131139;rs13476119;rs49289788;rs36548506;rs37895110;rs3691222;rs33589350
chr1_10691.7	chr1:133179022-133179272	Promoter (2-3kb)	dELS	Plekha6	4.39713	1	62.499	57.9788	63.8825	135170068	121353007	138606530	Significant in baseline	Protected effect	21	21	9	9	rs49289788	rs237885247;rs48962291;rs213804272;rs31189732;rs47085630;rs49565748;rs30561273;rs30785490;rs32612920;rs31573665;rs47328362;rs32769332;rs32013884;rs50349808;rs32811017;rs31348531;rs33889750;rs47026905;rs6263067;rs32558546;rs32101230;rs49892902;rs8256197;rs13459051;rs32335588;rs32112067;rs108035116;rs6250833;rs37505705;rs31762723;rs30763126;rs33494411;rs30766381;rs32452440;rs37131139;rs13476119;rs4…
chr1_10732.1	chr1:133262291-133262541	Intron (ENSMUST00000191207.1/100502933, intron 1 of 3)		Plekha6	3.92644	2	90.8429	17.1512	91.7453	171487633	30440967	173244458	Significant in baseline	No effect	19	19	12	12	rs28275396	rs13476408;rs33734426;rs230572488;rs49829810;rs51006262;rs13476413;rs33371101;rs13474428;rs13459060;rs28204077;rs13476419;rs32942981;rs33645392;rs29963019;rs261548625;rs13476423;rs13476425;rs13476427;rs33169514;rs27168911;rs13476429;rs29781174;rs3699934;rs48574562;rs27159829;rs13476435;rs3709811;rs29522142;rs32903643;rs27145737;rs27206251;rs6323034;rs29971702;rs13476452;rs50161039;rs32887404;rs27…
chr1_10735.2	chr1:133266693-133266943	Promoter (2-3kb)		Plekha6	3.56209	1	68.1592	5.33546	92.8648	151921167	12938444	189361953	Significant in baseline	No effect	25	25	6	6	rs31226073	rs36585555;rs30477285;rs32223513;rs45688852;rs48988706;rs31710291;rs31794283;rs6296049;rs32381514;rs31577697;rs30996958;rs31574495;rs32016169;rs6291839;rs32105394;rs3088964;rs30752472;rs3678179;rs32109300;rs32127151;rs47275793;rs32039596;rs51394091;rs31817535;rs32171777;rs32043384;rs219716413;rs13475747;rs51820747;rs51700370;rs52118613;rs31772262;rs3670611;rs224386739;rs36660068;rs6404446;rs32101…
chr1_10752.1	chr1:133301843-133302093	3' UTR		Plekha6	3.81449	X	42.398	39.3296	43.5908	146966235	144000000	151470124	Significant in baseline	No effect	16	16	12	12	rs13484060	Affy_PCX_141;rs107988427;rs13484060;DXMit10;rs31266096
chr1_10757.11	chr1:133310494-133310744	Promoter (<=1kb)		Golt1a	3.80851	19	40.1515	39.7698	45.7561	46582510	44599198	51965303	Significant in baseline	No effect	17	17	14	14	rs13483647	rs31274488;rs36521863;rs13483641;rs36931353;rs47499225;rs30320629;rs13483647;rs30886715;rs6376540;rs50610897;rs30567369;rs30556607;rs46999879;rs31157694;rs30419326;rs31282282;rs255692658;rs52477242;rs36491952;rs30902297;rs3691227;rs3660360;rs30367626;rs50499354;rs30313195;rs38377851;rs13483656;rs31206870;rs13483657;rs46278490;rs30549756;rs36414899;rs13483666;rs30414236;rs38637479;rs31209562;rs305…
chr1_10757.19	chr1:133312494-133312744	Promoter (2-3kb)		Golt1a	3.92691	18	54.149	52.985	57.2025	81487857	80000000	84126264	Significant in baseline	No effect	13	13	17	17	rs29930153	Affy_PC18_80;rs29930153;rs48660991;rs13483466;rs29723048;rs3703866;D18Mit4
chr1_10766.2	chr1:133331193-133331443	Distal Intergenic	dELS,CTCF-bound	Kiss1	4.71384	1	62.2187	58.4936	64.5265	133168278	124541277	139806775	Significant in baseline	Protected effect	20	20	11	11	rs30766381	rs47085630;rs49565748;rs30561273;rs30785490;rs32612920;rs31573665;rs47328362;rs32769332;rs32013884;rs50349808;rs32811017;rs31348531;rs33889750;rs47026905;rs6263067;rs32558546;rs32101230;rs49892902;rs8256197;rs13459051;rs32335588;rs32112067;rs108035116;rs6250833;rs37505705;rs31762723;rs30763126;rs33494411;rs30766381;rs32452440;rs37131139;rs13476119;rs49289788;rs36548506;rs37895110;rs3691222;rs3358…
chr1_10767.1	chr1:133332552-133332802	Distal Intergenic	dELS	Kiss1	6.99488	1	62.0915	60.9326	62.2187	132628058	130863937	133168278	Significant in baseline	No effect	20	20	11	11	rs30763126	rs32335588;rs32112067;rs108035116;rs6250833;rs37505705;rs31762723;rs30763126;rs33494411;rs30766381
chr1_10767.2	chr1:133332802-133333052	Distal Intergenic	dELS	Kiss1	5.8246	1	62.0915	57.9788	63.8825	132628058	121353007	138606530	Significant in baseline	Protected effect	20	20	11	11	rs30763126	rs237885247;rs48962291;rs213804272;rs31189732;rs47085630;rs49565748;rs30561273;rs30785490;rs32612920;rs31573665;rs47328362;rs32769332;rs32013884;rs50349808;rs32811017;rs31348531;rs33889750;rs47026905;rs6263067;rs32558546;rs32101230;rs49892902;rs8256197;rs13459051;rs32335588;rs32112067;rs108035116;rs6250833;rs37505705;rs31762723;rs30763126;rs33494411;rs30766381;rs32452440;rs37131139;rs13476119;rs4…
chr1_10767.3	chr1:133333052-133333302	Distal Intergenic	dELS	Kiss1	4.26078	1	62.0915	57.4639	64.5265	132628058	121148291	139806775	Significant in baseline	Protected effect	20	20	11	11	rs30763126	rs48015801;rs230640887;rs237885247;rs48962291;rs213804272;rs31189732;rs47085630;rs49565748;rs30561273;rs30785490;rs32612920;rs31573665;rs47328362;rs32769332;rs32013884;rs50349808;rs32811017;rs31348531;rs33889750;rs47026905;rs6263067;rs32558546;rs32101230;rs49892902;rs8256197;rs13459051;rs32335588;rs32112067;rs108035116;rs6250833;rs37505705;rs31762723;rs30763126;rs33494411;rs30766381;rs32452440;rs…
chr1_10769.1	chr1:133346654-133346904	Distal Intergenic		Ren2	6.28989	1	62.0915	57.4639	62.2187	132628058	121148291	133168278	Significant in baseline	Protected effect	20	20	11	11	rs30763126	rs48015801;rs230640887;rs237885247;rs48962291;rs213804272;rs31189732;rs47085630;rs49565748;rs30561273;rs30785490;rs32612920;rs31573665;rs47328362;rs32769332;rs32013884;rs50349808;rs32811017;rs31348531;rs33889750;rs47026905;rs6263067;rs32558546;rs32101230;rs49892902;rs8256197;rs13459051;rs32335588;rs32112067;rs108035116;rs6250833;rs37505705;rs31762723;rs30763126;rs33494411;rs30766381
chr1_10770.2	chr1:133347401-133347651	Promoter (2-3kb)		Ren2	7.99189	1	62.0915	60.0301	63.8825	132628058	128543687	138606530	Significant in baseline	Protected effect	20	20	11	11	rs30763126	rs32101230;rs49892902;rs8256197;rs13459051;rs32335588;rs32112067;rs108035116;rs6250833;rs37505705;rs31762723;rs30763126;rs33494411;rs30766381;rs32452440;rs37131139;rs13476119;rs49289788;rs36548506;rs37895110;rs3691222;rs33589350;rs33586240;rs6406033;rs46445754;rs31534627;rs215571652
chr1_10770.3	chr1:133347651-133347901	Promoter (2-3kb)	dELS,CTCF-bound	Ren2	7.64404	1	62.2187	57.4639	62.3459	133168278	121148291	133975583	Significant in baseline	No effect	20	20	11	11	rs30766381	rs48015801;rs230640887;rs237885247;rs48962291;rs213804272;rs31189732;rs47085630;rs49565748;rs30561273;rs30785490;rs32612920;rs31573665;rs47328362;rs32769332;rs32013884;rs50349808;rs32811017;rs31348531;rs33889750;rs47026905;rs6263067;rs32558546;rs32101230;rs49892902;rs8256197;rs13459051;rs32335588;rs32112067;rs108035116;rs6250833;rs37505705;rs31762723;rs30763126;rs33494411;rs30766381;rs32452440;rs…
chr1_10771.2	chr1:133349253-133349503	Promoter (1-2kb)		Ren2	6.51807	1	62.0915	59.2609	62.2187	132628058	126729134	133168278	Significant in baseline	No effect	20	20	11	11	rs30763126	rs32769332;rs32013884;rs50349808;rs32811017;rs31348531;rs33889750;rs47026905;rs6263067;rs32558546;rs32101230;rs49892902;rs8256197;rs13459051;rs32335588;rs32112067;rs108035116;rs6250833;rs37505705;rs31762723;rs30763126;rs33494411;rs30766381
chr1_10771.3	chr1:133349503-133349753	Promoter (<=1kb)		Ren2	6.57851	1	62.0915	60.0301	62.2187	132628058	128543687	133168278	Significant in baseline	No effect	20	20	11	11	rs30763126	rs32101230;rs49892902;rs8256197;rs13459051;rs32335588;rs32112067;rs108035116;rs6250833;rs37505705;rs31762723;rs30763126;rs33494411;rs30766381
chr1_10771.4	chr1:133349753-133350003	Promoter (<=1kb)		Ren2	6.06702	1	62.0915	57.4639	62.2187	132628058	121148291	133168278	Significant in baseline	No effect	20	20	11	11	rs30763126	rs48015801;rs230640887;rs237885247;rs48962291;rs213804272;rs31189732;rs47085630;rs49565748;rs30561273;rs30785490;rs32612920;rs31573665;rs47328362;rs32769332;rs32013884;rs50349808;rs32811017;rs31348531;rs33889750;rs47026905;rs6263067;rs32558546;rs32101230;rs49892902;rs8256197;rs13459051;rs32335588;rs32112067;rs108035116;rs6250833;rs37505705;rs31762723;rs30763126;rs33494411;rs30766381
chr1_10772.1	chr1:133350484-133350734	Promoter (<=1kb)		Ren2	5.1211	1	62.0915	53.1225	64.5265	132628058	104876883	139806775	Significant in baseline	No effect	20	20	11	11	rs30763126	rs13476030;rs32565357;rs32697536;rs30506144;rs30488981;rs30487561;rs30484039;rs47647099;rs49762567;rs3680216;rs31994637;rs31960226;rs32738873;rs31744083;rs47329570;rs31960159;rs13476045;rs45843892;rs31935680;rs3685919;rs6319405;rs3710646;rs30584583;rs51800183;rs48823920;rs30719160;rs31471077;rs30675648;rs32180662;rs30680977;rs32807094;rs30637341;rs32757674;rs32268077;rs30725178;rs30724278;rs30698…
chr1_10772.2	chr1:133350734-133350984	Promoter (<=1kb)		Ren2	5.61395	1	62.2187	57.8515	64.5265	133168278	121329451	139806775	Significant in baseline	No effect	20	20	11	11	rs30766381	rs230640887;rs237885247;rs48962291;rs213804272;rs31189732;rs47085630;rs49565748;rs30561273;rs30785490;rs32612920;rs31573665;rs47328362;rs32769332;rs32013884;rs50349808;rs32811017;rs31348531;rs33889750;rs47026905;rs6263067;rs32558546;rs32101230;rs49892902;rs8256197;rs13459051;rs32335588;rs32112067;rs108035116;rs6250833;rs37505705;rs31762723;rs30763126;rs33494411;rs30766381;rs32452440;rs37131139;rs…
chr1_10773.1	chr1:133351187-133351437	Promoter (<=1kb)		Ren1	6.88773	1	62.0915	60.0301	62.2187	132628058	128543687	133168278	Significant in baseline	No effect	20	20	11	11	rs30763126	rs32101230;rs49892902;rs8256197;rs13459051;rs32335588;rs32112067;rs108035116;rs6250833;rs37505705;rs31762723;rs30763126;rs33494411;rs30766381
chr1_10774.10	chr1:133353920-133354170	Promoter (2-3kb)		Ren1	6.5259	1	62.0915	59.2609	62.6023	132628058	126729134	135170068	Significant in baseline	No effect	20	20	11	11	rs30763126	rs32769332;rs32013884;rs50349808;rs32811017;rs31348531;rs33889750;rs47026905;rs6263067;rs32558546;rs32101230;rs49892902;rs8256197;rs13459051;rs32335588;rs32112067;rs108035116;rs6250833;rs37505705;rs31762723;rs30763126;rs33494411;rs30766381;rs32452440;rs37131139;rs13476119;rs49289788
chr1_10774.11	chr1:133354170-133354420	Promoter (2-3kb)		Ren1	6.07948	1	62.0915	59.2609	64.5265	132628058	126729134	139806775	Significant in baseline	No effect	20	20	11	11	rs30763126	rs32769332;rs32013884;rs50349808;rs32811017;rs31348531;rs33889750;rs47026905;rs6263067;rs32558546;rs32101230;rs49892902;rs8256197;rs13459051;rs32335588;rs32112067;rs108035116;rs6250833;rs37505705;rs31762723;rs30763126;rs33494411;rs30766381;rs32452440;rs37131139;rs13476119;rs49289788;rs36548506;rs37895110;rs3691222;rs33589350;rs33586240;rs6406033;rs46445754;rs31534627;rs215571652;rs13476137;rs1347…
chr1_10774.12	chr1:133354420-133354670	Promoter (2-3kb)		Ren1	7.10279	1	62.0915	60.0301	62.2187	132628058	128543687	133168278	Significant in baseline	No effect	20	20	11	11	rs30763126	rs32101230;rs49892902;rs8256197;rs13459051;rs32335588;rs32112067;rs108035116;rs6250833;rs37505705;rs31762723;rs30763126;rs33494411;rs30766381
chr1_10774.13	chr1:133354670-133354920	Promoter (2-3kb)		Ren1	6.97714	1	62.0915	59.2609	62.2187	132628058	126729134	133168278	Significant in baseline	No effect	20	20	11	11	rs30763126	rs32769332;rs32013884;rs50349808;rs32811017;rs31348531;rs33889750;rs47026905;rs6263067;rs32558546;rs32101230;rs49892902;rs8256197;rs13459051;rs32335588;rs32112067;rs108035116;rs6250833;rs37505705;rs31762723;rs30763126;rs33494411;rs30766381
chr1_10774.14	chr1:133354920-133355170	Exon (ENSMUST00000094556.2/19702, exon 3 of 9)		Ren1	6.41407	1	62.0915	58.748	62.3459	132628058	126657091	133975583	Significant in baseline	No effect	20	20	11	11	rs30763126	rs32612920;rs31573665;rs47328362;rs32769332;rs32013884;rs50349808;rs32811017;rs31348531;rs33889750;rs47026905;rs6263067;rs32558546;rs32101230;rs49892902;rs8256197;rs13459051;rs32335588;rs32112067;rs108035116;rs6250833;rs37505705;rs31762723;rs30763126;rs33494411;rs30766381;rs32452440;rs37131139
chr1_10774.16	chr1:133355420-133355670	Exon (ENSMUST00000094556.2/19702, exon 4 of 9)		Ren1	4.55047	1	62.0915	54.4027	64.5265	132628058	107486168	139806775	Significant in baseline	No effect	20	20	11	11	rs30763126	rs31960226;rs32738873;rs31744083;rs47329570;rs31960159;rs13476045;rs45843892;rs31935680;rs3685919;rs6319405;rs3710646;rs30584583;rs51800183;rs48823920;rs30719160;rs31471077;rs30675648;rs32180662;rs30680977;rs32807094;rs30637341;rs32757674;rs32268077;rs30725178;rs30724278;rs30698282;rs3723088;rs3663708;rs31007558;rs30727085;rs48015801;rs230640887;rs237885247;rs48962291;rs213804272;rs31189732;rs470…
chr1_10774.17	chr1:133355670-133355920	Intron (ENSMUST00000094556.2/19702, intron 4 of 8)		Ren1	4.69044	1	62.0915	54.5299	62.6023	132628058	108386362	135170068	Significant in baseline	No effect	20	20	11	11	rs30763126	rs31744083;rs47329570;rs31960159;rs13476045;rs45843892;rs31935680;rs3685919;rs6319405;rs3710646;rs30584583;rs51800183;rs48823920;rs30719160;rs31471077;rs30675648;rs32180662;rs30680977;rs32807094;rs30637341;rs32757674;rs32268077;rs30725178;rs30724278;rs30698282;rs3723088;rs3663708;rs31007558;rs30727085;rs48015801;rs230640887;rs237885247;rs48962291;rs213804272;rs31189732;rs47085630;rs49565748;rs305…
chr1_10774.18	chr1:133355920-133356170	Intron (ENSMUST00000094556.2/19702, intron 4 of 8)		Ren1	7.38941	1	62.0915	58.6208	62.3459	132628058	126078905	133975583	Significant in baseline	No effect	20	20	11	11	rs30763126	rs30561273;rs30785490;rs32612920;rs31573665;rs47328362;rs32769332;rs32013884;rs50349808;rs32811017;rs31348531;rs33889750;rs47026905;rs6263067;rs32558546;rs32101230;rs49892902;rs8256197;rs13459051;rs32335588;rs32112067;rs108035116;rs6250833;rs37505705;rs31762723;rs30763126;rs33494411;rs30766381;rs32452440;rs37131139
chr1_10774.19	chr1:133356170-133356420	Exon (ENSMUST00000094556.2/19702, exon 5 of 9)		Ren1	8.22696	1	60.0301	60.0301	62.2187	128543687	128543687	133168278	Significant in baseline	No effect	19	19	12	12	rs32101230	rs32101230;rs49892902;rs8256197;rs13459051;rs32335588;rs32112067;rs108035116;rs6250833;rs37505705;rs31762723;rs30763126;rs33494411;rs30766381
chr1_10774.2	chr1:133351920-133352170	Promoter (<=1kb)	pELS	Ren1	8.21772	1	62.0915	60.0301	62.2187	132628058	128543687	133168278	Significant in baseline	No effect	20	20	11	11	rs30763126	rs32101230;rs49892902;rs8256197;rs13459051;rs32335588;rs32112067;rs108035116;rs6250833;rs37505705;rs31762723;rs30763126;rs33494411;rs30766381
chr1_10774.20	chr1:133356420-133356670	Exon (ENSMUST00000094556.2/19702, exon 5 of 9)	dELS; dELS,CTCF-bound	Ren1	7.10933	1	62.0915	57.9788	62.2187	132628058	121353007	133168278	Significant in baseline	No effect	20	20	11	11	rs30763126	rs237885247;rs48962291;rs213804272;rs31189732;rs47085630;rs49565748;rs30561273;rs30785490;rs32612920;rs31573665;rs47328362;rs32769332;rs32013884;rs50349808;rs32811017;rs31348531;rs33889750;rs47026905;rs6263067;rs32558546;rs32101230;rs49892902;rs8256197;rs13459051;rs32335588;rs32112067;rs108035116;rs6250833;rs37505705;rs31762723;rs30763126;rs33494411;rs30766381
chr1_10774.21	chr1:133356670-133356920	Intron (ENSMUST00000094556.2/19702, intron 5 of 8)	dELS	Ren1	8.01716	1	62.2187	60.0301	62.6023	133168278	128543687	135170068	Significant in baseline	No effect	20	20	11	11	rs30766381	rs32101230;rs49892902;rs8256197;rs13459051;rs32335588;rs32112067;rs108035116;rs6250833;rs37505705;rs31762723;rs30763126;rs33494411;rs30766381;rs32452440;rs37131139;rs13476119;rs49289788
chr1_10774.22	chr1:133356920-133357170	Intron (ENSMUST00000094556.2/19702, intron 5 of 8)	dELS	Ren1	6.64347	1	62.2187	57.4639	62.2187	133168278	121148291	133168278	Significant in baseline	No effect	20	20	11	11	rs30766381	rs48015801;rs230640887;rs237885247;rs48962291;rs213804272;rs31189732;rs47085630;rs49565748;rs30561273;rs30785490;rs32612920;rs31573665;rs47328362;rs32769332;rs32013884;rs50349808;rs32811017;rs31348531;rs33889750;rs47026905;rs6263067;rs32558546;rs32101230;rs49892902;rs8256197;rs13459051;rs32335588;rs32112067;rs108035116;rs6250833;rs37505705;rs31762723;rs30763126;rs33494411;rs30766381
chr1_10774.23	chr1:133357170-133357420	Intron (ENSMUST00000094556.2/19702, intron 5 of 8)		Ren1	6.57165	1	62.0915	57.4639	62.2187	132628058	121148291	133168278	Significant in baseline	No effect	20	20	11	11	rs30763126	rs48015801;rs230640887;rs237885247;rs48962291;rs213804272;rs31189732;rs47085630;rs49565748;rs30561273;rs30785490;rs32612920;rs31573665;rs47328362;rs32769332;rs32013884;rs50349808;rs32811017;rs31348531;rs33889750;rs47026905;rs6263067;rs32558546;rs32101230;rs49892902;rs8256197;rs13459051;rs32335588;rs32112067;rs108035116;rs6250833;rs37505705;rs31762723;rs30763126;rs33494411;rs30766381
chr1_10774.24	chr1:133357420-133357670	Intron (ENSMUST00000094556.2/19702, intron 5 of 8)		Ren1	9.64529	1	60.0301	60.0301	60.0301	128543687	128543687	128543687	Significant in baseline	No effect	19	19	12	12	rs32101230	rs32101230
chr1_10774.24	chr1:133357420-133357670	Intron (ENSMUST00000094556.2/19702, intron 5 of 8)		Ren1	9.23419	1	62.2187	61.837	62.6023	133168278	132035118	135170068	Significant in baseline	No effect	20	20	11	11	rs30766381	rs37505705;rs31762723;rs30763126;rs33494411;rs30766381;rs32452440;rs37131139;rs13476119;rs49289788
chr1_10774.25	chr1:133357670-133357920	Intron (ENSMUST00000094556.2/19702, intron 5 of 8)		Etnk2	6.8995	1	62.0915	57.4639	62.2187	132628058	121148291	133168278	Significant in baseline	Protected effect	20	20	11	11	rs30763126	rs48015801;rs230640887;rs237885247;rs48962291;rs213804272;rs31189732;rs47085630;rs49565748;rs30561273;rs30785490;rs32612920;rs31573665;rs47328362;rs32769332;rs32013884;rs50349808;rs32811017;rs31348531;rs33889750;rs47026905;rs6263067;rs32558546;rs32101230;rs49892902;rs8256197;rs13459051;rs32335588;rs32112067;rs108035116;rs6250833;rs37505705;rs31762723;rs30763126;rs33494411;rs30766381
chr1_10774.26	chr1:133357920-133358170	Intron (ENSMUST00000094556.2/19702, intron 5 of 8)		Etnk2	5.52545	1	59.2609	53.6334	62.2187	126729134	106321454	133168278	Significant in baseline	No effect	20	20	11	11	rs32769332	rs30487561;rs30484039;rs47647099;rs49762567;rs3680216;rs31994637;rs31960226;rs32738873;rs31744083;rs47329570;rs31960159;rs13476045;rs45843892;rs31935680;rs3685919;rs6319405;rs3710646;rs30584583;rs51800183;rs48823920;rs30719160;rs31471077;rs30675648;rs32180662;rs30680977;rs32807094;rs30637341;rs32757674;rs32268077;rs30725178;rs30724278;rs30698282;rs3723088;rs3663708;rs31007558;rs30727085;rs4801580…
chr1_10774.27	chr1:133358170-133358420	Exon (ENSMUST00000094556.2/19702, exon 6 of 9)		Etnk2	4.802	1	54.5299	53.8878	55.1699	108386362	106591714	109540731	Significant in baseline	No effect	21	21	10	10	rs31744083	rs49762567;rs3680216;rs31994637;rs31960226;rs32738873;rs31744083;rs47329570;rs31960159;rs13476045;rs45843892;rs31935680
chr1_10774.27	chr1:133358170-133358420	Exon (ENSMUST00000094556.2/19702, exon 6 of 9)		Etnk2	7.11688	1	62.0915	57.4639	62.2187	132628058	121148291	133168278	Significant in baseline	No effect	20	20	11	11	rs30763126	rs48015801;rs230640887;rs237885247;rs48962291;rs213804272;rs31189732;rs47085630;rs49565748;rs30561273;rs30785490;rs32612920;rs31573665;rs47328362;rs32769332;rs32013884;rs50349808;rs32811017;rs31348531;rs33889750;rs47026905;rs6263067;rs32558546;rs32101230;rs49892902;rs8256197;rs13459051;rs32335588;rs32112067;rs108035116;rs6250833;rs37505705;rs31762723;rs30763126;rs33494411;rs30766381
chr1_10774.28	chr1:133358420-133358670	Exon (ENSMUST00000094556.2/19702, exon 6 of 9)		Etnk2	7.18066	1	60.0301	59.2609	62.2187	128543687	126729134	133168278	Significant in baseline	No effect	19	19	12	12	rs32101230	rs32769332;rs32013884;rs50349808;rs32811017;rs31348531;rs33889750;rs47026905;rs6263067;rs32558546;rs32101230;rs49892902;rs8256197;rs13459051;rs32335588;rs32112067;rs108035116;rs6250833;rs37505705;rs31762723;rs30763126;rs33494411;rs30766381
chr1_10774.29	chr1:133358670-133358920	Intron (ENSMUST00000094556.2/19702, intron 6 of 8)		Etnk2	7.67531	1	62.0915	60.0301	62.2187	132628058	128543687	133168278	Significant in baseline	No effect	20	20	11	11	rs30763126	rs32101230;rs49892902;rs8256197;rs13459051;rs32335588;rs32112067;rs108035116;rs6250833;rs37505705;rs31762723;rs30763126;rs33494411;rs30766381
chr1_10774.3	chr1:133352170-133352420	Promoter (<=1kb)		Ren1	7.61861	1	62.3459	60.9326	62.3459	133975583	130863937	133975583	Significant in baseline	No effect	21	21	10	10	rs37131139	rs32335588;rs32112067;rs108035116;rs6250833;rs37505705;rs31762723;rs30763126;rs33494411;rs30766381;rs32452440;rs37131139
chr1_10774.30	chr1:133358920-133359170	Exon (ENSMUST00000094556.2/19702, exon 7 of 9)		Etnk2	6.02366	1	62.0915	54.0151	62.3459	132628058	106835365	133975583	Significant in baseline	No effect	20	20	11	11	rs30763126	rs31994637;rs31960226;rs32738873;rs31744083;rs47329570;rs31960159;rs13476045;rs45843892;rs31935680;rs3685919;rs6319405;rs3710646;rs30584583;rs51800183;rs48823920;rs30719160;rs31471077;rs30675648;rs32180662;rs30680977;rs32807094;rs30637341;rs32757674;rs32268077;rs30725178;rs30724278;rs30698282;rs3723088;rs3663708;rs31007558;rs30727085;rs48015801;rs230640887;rs237885247;rs48962291;rs213804272;rs311…
chr1_10774.31	chr1:133359170-133359420	Exon (ENSMUST00000094556.2/19702, exon 8 of 9)		Etnk2	6.36323	1	62.0915	54.4027	62.2187	132628058	107486168	133168278	Significant in baseline	No effect	20	20	11	11	rs30763126	rs31960226;rs32738873;rs31744083;rs47329570;rs31960159;rs13476045;rs45843892;rs31935680;rs3685919;rs6319405;rs3710646;rs30584583;rs51800183;rs48823920;rs30719160;rs31471077;rs30675648;rs32180662;rs30680977;rs32807094;rs30637341;rs32757674;rs32268077;rs30725178;rs30724278;rs30698282;rs3723088;rs3663708;rs31007558;rs30727085;rs48015801;rs230640887;rs237885247;rs48962291;rs213804272;rs31189732;rs470…
chr1_10774.32	chr1:133359420-133359670	Exon (ENSMUST00000094556.2/19702, exon 8 of 9)		Etnk2	7.63007	1	62.0915	57.8515	62.2187	132628058	121329451	133168278	Significant in baseline	No effect	20	20	11	11	rs30763126	rs230640887;rs237885247;rs48962291;rs213804272;rs31189732;rs47085630;rs49565748;rs30561273;rs30785490;rs32612920;rs31573665;rs47328362;rs32769332;rs32013884;rs50349808;rs32811017;rs31348531;rs33889750;rs47026905;rs6263067;rs32558546;rs32101230;rs49892902;rs8256197;rs13459051;rs32335588;rs32112067;rs108035116;rs6250833;rs37505705;rs31762723;rs30763126;rs33494411;rs30766381
chr1_10774.33	chr1:133359670-133359920	Intron (ENSMUST00000094556.2/19702, intron 8 of 8)		Etnk2	8.0578	1	62.0915	59.2609	62.6023	132628058	126729134	135170068	Significant in baseline	No effect	20	20	11	11	rs30763126	rs32769332;rs32013884;rs50349808;rs32811017;rs31348531;rs33889750;rs47026905;rs6263067;rs32558546;rs32101230;rs49892902;rs8256197;rs13459051;rs32335588;rs32112067;rs108035116;rs6250833;rs37505705;rs31762723;rs30763126;rs33494411;rs30766381;rs32452440;rs37131139;rs13476119;rs49289788
chr1_10774.34	chr1:133359920-133360170	3' UTR		Etnk2	5.56777	1	59.2609	54.4027	60.0301	126729134	107486168	128543687	Significant in baseline	No effect	20	20	11	11	rs32769332	rs31960226;rs32738873;rs31744083;rs47329570;rs31960159;rs13476045;rs45843892;rs31935680;rs3685919;rs6319405;rs3710646;rs30584583;rs51800183;rs48823920;rs30719160;rs31471077;rs30675648;rs32180662;rs30680977;rs32807094;rs30637341;rs32757674;rs32268077;rs30725178;rs30724278;rs30698282;rs3723088;rs3663708;rs31007558;rs30727085;rs48015801;rs230640887;rs237885247;rs48962291;rs213804272;rs31189732;rs470…
chr1_10774.34	chr1:133359920-133360170	3' UTR		Etnk2	5.75712	1	62.2187	60.9326	64.5265	133168278	130863937	139806775	Significant in baseline	No effect	20	20	11	11	rs30766381	rs32335588;rs32112067;rs108035116;rs6250833;rs37505705;rs31762723;rs30763126;rs33494411;rs30766381;rs32452440;rs37131139;rs13476119;rs49289788;rs36548506;rs37895110;rs3691222;rs33589350;rs33586240;rs6406033;rs46445754;rs31534627;rs215571652;rs13476137;rs13476138;rs49147137;rs107630249
chr1_10774.35	chr1:133360170-133360420	3' UTR		Etnk2	7.83487	1	62.2187	60.0301	62.3459	133168278	128543687	133975583	Significant in baseline	No effect	20	20	11	11	rs30766381	rs32101230;rs49892902;rs8256197;rs13459051;rs32335588;rs32112067;rs108035116;rs6250833;rs37505705;rs31762723;rs30763126;rs33494411;rs30766381;rs32452440;rs37131139
chr1_10774.4	chr1:133352420-133352670	Promoter (<=1kb)		Ren1	8.42301	1	62.2187	60.0301	62.3459	133168278	128543687	133975583	Significant in baseline	No effect	20	20	11	11	rs30766381	rs32101230;rs49892902;rs8256197;rs13459051;rs32335588;rs32112067;rs108035116;rs6250833;rs37505705;rs31762723;rs30763126;rs33494411;rs30766381;rs32452440;rs37131139
chr1_10774.5	chr1:133352670-133352920	Promoter (<=1kb)		Ren1	8.18247	1	62.2187	60.9326	62.6023	133168278	130863937	135170068	Significant in baseline	No effect	20	20	11	11	rs30766381	rs32335588;rs32112067;rs108035116;rs6250833;rs37505705;rs31762723;rs30763126;rs33494411;rs30766381;rs32452440;rs37131139;rs13476119;rs49289788
chr1_10774.6	chr1:133352920-133353170	Promoter (1-2kb)		Ren1	7.6596	1	62.2187	57.9788	62.6023	133168278	121353007	135170068	Significant in baseline	No effect	20	20	11	11	rs30766381	rs237885247;rs48962291;rs213804272;rs31189732;rs47085630;rs49565748;rs30561273;rs30785490;rs32612920;rs31573665;rs47328362;rs32769332;rs32013884;rs50349808;rs32811017;rs31348531;rs33889750;rs47026905;rs6263067;rs32558546;rs32101230;rs49892902;rs8256197;rs13459051;rs32335588;rs32112067;rs108035116;rs6250833;rs37505705;rs31762723;rs30763126;rs33494411;rs30766381;rs32452440;rs37131139;rs13476119;rs4…
chr1_10774.7	chr1:133353170-133353420	Promoter (1-2kb)		Ren1	6.82235	1	62.2187	60.9326	62.3459	133168278	130863937	133975583	Significant in baseline	No effect	20	20	11	11	rs30766381	rs32335588;rs32112067;rs108035116;rs6250833;rs37505705;rs31762723;rs30763126;rs33494411;rs30766381;rs32452440;rs37131139
chr1_10774.9	chr1:133353670-133353920	Promoter (1-2kb)	CTCF-only,CTCF-bound	Ren1	6.22668	1	62.0915	54.5299	62.3459	132628058	108386362	133975583	Significant in baseline	No effect	20	20	11	11	rs30763126	rs31744083;rs47329570;rs31960159;rs13476045;rs45843892;rs31935680;rs3685919;rs6319405;rs3710646;rs30584583;rs51800183;rs48823920;rs30719160;rs31471077;rs30675648;rs32180662;rs30680977;rs32807094;rs30637341;rs32757674;rs32268077;rs30725178;rs30724278;rs30698282;rs3723088;rs3663708;rs31007558;rs30727085;rs48015801;rs230640887;rs237885247;rs48962291;rs213804272;rs31189732;rs47085630;rs49565748;rs305…
chr1_10775.1	chr1:133361437-133361687	Promoter (1-2kb)		Etnk2	8.58064	1	62.2187	60.0301	63.1132	133168278	128543687	136537577	Significant in baseline	No effect	20	20	11	11	rs30766381	rs32101230;rs49892902;rs8256197;rs13459051;rs32335588;rs32112067;rs108035116;rs6250833;rs37505705;rs31762723;rs30763126;rs33494411;rs30766381;rs32452440;rs37131139;rs13476119;rs49289788;rs36548506;rs37895110;rs3691222;rs33589350
chr1_10775.10	chr1:133363687-133363937	Promoter (<=1kb)	dELS	Etnk2	9.09483	1	62.0915	60.0301	62.2187	132628058	128543687	133168278	Significant in baseline	No effect	20	20	11	11	rs30763126	rs32101230;rs49892902;rs8256197;rs13459051;rs32335588;rs32112067;rs108035116;rs6250833;rs37505705;rs31762723;rs30763126;rs33494411;rs30766381
chr1_10775.11	chr1:133363937-133364187	Promoter (<=1kb)		Etnk2	7.86733	1	62.0915	60.0301	62.2187	132628058	128543687	133168278	Significant in baseline	Protected effect	20	20	11	11	rs30763126	rs32101230;rs49892902;rs8256197;rs13459051;rs32335588;rs32112067;rs108035116;rs6250833;rs37505705;rs31762723;rs30763126;rs33494411;rs30766381
chr1_10775.12	chr1:133364187-133364437	Promoter (<=1kb)	dELS	Etnk2	5.31693	1	62.0915	53.8878	62.2187	132628058	106591714	133168278	Significant in baseline	No effect	20	20	11	11	rs30763126	rs49762567;rs3680216;rs31994637;rs31960226;rs32738873;rs31744083;rs47329570;rs31960159;rs13476045;rs45843892;rs31935680;rs3685919;rs6319405;rs3710646;rs30584583;rs51800183;rs48823920;rs30719160;rs31471077;rs30675648;rs32180662;rs30680977;rs32807094;rs30637341;rs32757674;rs32268077;rs30725178;rs30724278;rs30698282;rs3723088;rs3663708;rs31007558;rs30727085;rs48015801;rs230640887;rs237885247;rs48962…
chr1_10775.13	chr1:133364437-133364687	Promoter (<=1kb)	dELS	Etnk2	7.97855	1	60.0301	60.0301	62.8588	128543687	128543687	135562623	Significant in baseline	No effect	19	19	12	12	rs32101230	rs32101230;rs49892902;rs8256197;rs13459051;rs32335588;rs32112067;rs108035116;rs6250833;rs37505705;rs31762723;rs30763126;rs33494411;rs30766381;rs32452440;rs37131139;rs13476119;rs49289788;rs36548506;rs37895110
chr1_10775.14	chr1:133364687-133364937	Promoter (<=1kb)		Etnk2	7.61379	1	62.0915	57.9788	62.2187	132628058	121353007	133168278	Significant in baseline	No effect	20	20	11	11	rs30763126	rs237885247;rs48962291;rs213804272;rs31189732;rs47085630;rs49565748;rs30561273;rs30785490;rs32612920;rs31573665;rs47328362;rs32769332;rs32013884;rs50349808;rs32811017;rs31348531;rs33889750;rs47026905;rs6263067;rs32558546;rs32101230;rs49892902;rs8256197;rs13459051;rs32335588;rs32112067;rs108035116;rs6250833;rs37505705;rs31762723;rs30763126;rs33494411;rs30766381
chr1_10775.15	chr1:133364937-133365187	Promoter (<=1kb)	dELS	Etnk2	6.38123	1	62.0915	59.2609	62.6023	132628058	126729134	135170068	Significant in baseline	No effect	20	20	11	11	rs30763126	rs32769332;rs32013884;rs50349808;rs32811017;rs31348531;rs33889750;rs47026905;rs6263067;rs32558546;rs32101230;rs49892902;rs8256197;rs13459051;rs32335588;rs32112067;rs108035116;rs6250833;rs37505705;rs31762723;rs30763126;rs33494411;rs30766381;rs32452440;rs37131139;rs13476119;rs49289788
chr1_10775.16	chr1:133365187-133365437	Promoter (<=1kb)		Etnk2	8.52946	1	62.2187	60.0301	62.2187	133168278	128543687	133168278	Significant in baseline	No effect	20	20	11	11	rs30766381	rs32101230;rs49892902;rs8256197;rs13459051;rs32335588;rs32112067;rs108035116;rs6250833;rs37505705;rs31762723;rs30763126;rs33494411;rs30766381
chr1_10775.17	chr1:133365437-133365687	Promoter (<=1kb)		Etnk2	8.05945	1	62.2187	60.0301	62.6023	133168278	128543687	135170068	Significant in baseline	No effect	20	20	11	11	rs30766381	rs32101230;rs49892902;rs8256197;rs13459051;rs32335588;rs32112067;rs108035116;rs6250833;rs37505705;rs31762723;rs30763126;rs33494411;rs30766381;rs32452440;rs37131139;rs13476119;rs49289788
chr1_10775.18	chr1:133365687-133365937	Promoter (<=1kb)		Etnk2	7.25188	1	62.0915	59.2609	62.3459	132628058	126729134	133975583	Significant in baseline	No effect	20	20	11	11	rs30763126	rs32769332;rs32013884;rs50349808;rs32811017;rs31348531;rs33889750;rs47026905;rs6263067;rs32558546;rs32101230;rs49892902;rs8256197;rs13459051;rs32335588;rs32112067;rs108035116;rs6250833;rs37505705;rs31762723;rs30763126;rs33494411;rs30766381;rs32452440;rs37131139
chr1_10775.19	chr1:133365937-133366187	Promoter (<=1kb)		Etnk2	5.37689	1	62.0915	57.8515	62.2187	132628058	121329451	133168278	Significant in baseline	No effect	20	20	11	11	rs30763126	rs230640887;rs237885247;rs48962291;rs213804272;rs31189732;rs47085630;rs49565748;rs30561273;rs30785490;rs32612920;rs31573665;rs47328362;rs32769332;rs32013884;rs50349808;rs32811017;rs31348531;rs33889750;rs47026905;rs6263067;rs32558546;rs32101230;rs49892902;rs8256197;rs13459051;rs32335588;rs32112067;rs108035116;rs6250833;rs37505705;rs31762723;rs30763126;rs33494411;rs30766381
chr1_10775.2	chr1:133361687-133361937	Promoter (1-2kb)	dELS	Etnk2	6.04974	1	62.0915	57.4639	62.6023	132628058	121148291	135170068	Significant in baseline	No effect	20	20	11	11	rs30763126	rs48015801;rs230640887;rs237885247;rs48962291;rs213804272;rs31189732;rs47085630;rs49565748;rs30561273;rs30785490;rs32612920;rs31573665;rs47328362;rs32769332;rs32013884;rs50349808;rs32811017;rs31348531;rs33889750;rs47026905;rs6263067;rs32558546;rs32101230;rs49892902;rs8256197;rs13459051;rs32335588;rs32112067;rs108035116;rs6250833;rs37505705;rs31762723;rs30763126;rs33494411;rs30766381;rs32452440;rs…
chr1_10775.20	chr1:133366187-133366437	Promoter (<=1kb)		Etnk2	6.39956	1	62.2187	60.9326	62.3459	133168278	130863937	133975583	Significant in baseline	No effect	20	20	11	11	rs30766381	rs32335588;rs32112067;rs108035116;rs6250833;rs37505705;rs31762723;rs30763126;rs33494411;rs30766381;rs32452440;rs37131139
chr1_10775.21	chr1:133366437-133366687	Promoter (<=1kb)		Etnk2	6.88803	1	62.0915	57.4639	62.2187	132628058	121148291	133168278	Significant in baseline	No effect	20	20	11	11	rs30763126	rs48015801;rs230640887;rs237885247;rs48962291;rs213804272;rs31189732;rs47085630;rs49565748;rs30561273;rs30785490;rs32612920;rs31573665;rs47328362;rs32769332;rs32013884;rs50349808;rs32811017;rs31348531;rs33889750;rs47026905;rs6263067;rs32558546;rs32101230;rs49892902;rs8256197;rs13459051;rs32335588;rs32112067;rs108035116;rs6250833;rs37505705;rs31762723;rs30763126;rs33494411;rs30766381
chr1_10775.22	chr1:133366687-133366937	Promoter (<=1kb)		Etnk2	8.32779	1	62.0915	60.4177	62.2187	132628058	128544902	133168278	Significant in baseline	No effect	20	20	11	11	rs30763126	rs49892902;rs8256197;rs13459051;rs32335588;rs32112067;rs108035116;rs6250833;rs37505705;rs31762723;rs30763126;rs33494411;rs30766381
chr1_10775.23	chr1:133366937-133367187	Promoter (<=1kb)	dELS,CTCF-bound	Etnk2	4.0744	1	62.3459	59.2609	66.4935	133975583	126729134	145394499	Significant in baseline	No effect	21	21	10	10	rs37131139	rs32769332;rs32013884;rs50349808;rs32811017;rs31348531;rs33889750;rs47026905;rs6263067;rs32558546;rs32101230;rs49892902;rs8256197;rs13459051;rs32335588;rs32112067;rs108035116;rs6250833;rs37505705;rs31762723;rs30763126;rs33494411;rs30766381;rs32452440;rs37131139;rs13476119;rs49289788;rs36548506;rs37895110;rs3691222;rs33589350;rs33586240;rs6406033;rs46445754;rs31534627;rs215571652;rs13476137;rs1347…
chr1_10775.24	chr1:133367187-133367437	Promoter (<=1kb)	dELS,CTCF-bound	Etnk2	3.63887	X	50.6023	15.1327	51.7552	166340107	50932422	167394896	Significant in baseline	Protected effect	21	21	10	10	rs31551153	rs13483749;rs30300280;rs31163021;rs13483753;rs48266651;rs51882563;rs48236507;rs51577945;rs13483756;rs30417763;rs13483757;rs259406772;rs31196532;rs29058484;rs13483765;rs29058309;rs47978544;rs212766299;rs29058288;rs13483768;rs29060832;rs13483769;rs29057816;rs29057773;rs29059808;rs29057552;rs13483770;rs48259763;rs31360508;rs232735621;rs29052163;rs29046879;rs33876026;rs31296287;rs13483813;rs29043238;…
chr1_10775.3	chr1:133361937-133362187	Promoter (1-2kb)	dELS	Etnk2	5.87461	1	62.2187	57.4639	64.5265	133168278	121148291	139806775	Significant in baseline	No effect	20	20	11	11	rs30766381	rs48015801;rs230640887;rs237885247;rs48962291;rs213804272;rs31189732;rs47085630;rs49565748;rs30561273;rs30785490;rs32612920;rs31573665;rs47328362;rs32769332;rs32013884;rs50349808;rs32811017;rs31348531;rs33889750;rs47026905;rs6263067;rs32558546;rs32101230;rs49892902;rs8256197;rs13459051;rs32335588;rs32112067;rs108035116;rs6250833;rs37505705;rs31762723;rs30763126;rs33494411;rs30766381;rs32452440;rs…
chr1_10775.30	chr1:133368687-133368937	Promoter (1-2kb)	dELS	Etnk2	5.73886	1	62.0915	60.9326	63.8825	132628058	130863937	138606530	Significant in baseline	No effect	20	20	11	11	rs30763126	rs32335588;rs32112067;rs108035116;rs6250833;rs37505705;rs31762723;rs30763126;rs33494411;rs30766381;rs32452440;rs37131139;rs13476119;rs49289788;rs36548506;rs37895110;rs3691222;rs33589350;rs33586240;rs6406033;rs46445754;rs31534627;rs215571652
chr1_10775.31	chr1:133368937-133369187	Promoter (1-2kb)		Etnk2	6.30818	1	62.0915	60.9326	63.7553	132628058	130863937	138573759	Significant in baseline	Protected effect	20	20	11	11	rs30763126	rs32335588;rs32112067;rs108035116;rs6250833;rs37505705;rs31762723;rs30763126;rs33494411;rs30766381;rs32452440;rs37131139;rs13476119;rs49289788;rs36548506;rs37895110;rs3691222;rs33589350;rs33586240;rs6406033;rs46445754;rs31534627
chr1_10775.4	chr1:133362187-133362437	Promoter (1-2kb)	dELS	Etnk2	7.03924	1	62.2187	60.0301	63.1132	133168278	128543687	136537577	Significant in baseline	No effect	20	20	11	11	rs30766381	rs32101230;rs49892902;rs8256197;rs13459051;rs32335588;rs32112067;rs108035116;rs6250833;rs37505705;rs31762723;rs30763126;rs33494411;rs30766381;rs32452440;rs37131139;rs13476119;rs49289788;rs36548506;rs37895110;rs3691222;rs33589350
chr1_10775.5	chr1:133362437-133362687	Promoter (<=1kb)	dELS	Etnk2	5.29471	1	62.3459	59.2609	64.2701	133975583	126729134	139521091	Significant in baseline	No effect	21	21	10	10	rs37131139	rs32769332;rs32013884;rs50349808;rs32811017;rs31348531;rs33889750;rs47026905;rs6263067;rs32558546;rs32101230;rs49892902;rs8256197;rs13459051;rs32335588;rs32112067;rs108035116;rs6250833;rs37505705;rs31762723;rs30763126;rs33494411;rs30766381;rs32452440;rs37131139;rs13476119;rs49289788;rs36548506;rs37895110;rs3691222;rs33589350;rs33586240;rs6406033;rs46445754;rs31534627;rs215571652;rs13476137;rs1347…
chr1_10775.6	chr1:133362687-133362937	Promoter (<=1kb)	dELS	Etnk2	8.12001	1	62.3459	60.0301	63.1132	133975583	128543687	136537577	Significant in baseline	No effect	21	21	10	10	rs37131139	rs32101230;rs49892902;rs8256197;rs13459051;rs32335588;rs32112067;rs108035116;rs6250833;rs37505705;rs31762723;rs30763126;rs33494411;rs30766381;rs32452440;rs37131139;rs13476119;rs49289788;rs36548506;rs37895110;rs3691222;rs33589350
chr1_10775.7	chr1:133362937-133363187	Promoter (<=1kb)	dELS	Etnk2	8.07561	1	62.2187	60.0301	62.3459	133168278	128543687	133975583	Significant in baseline	No effect	20	20	11	11	rs30766381	rs32101230;rs49892902;rs8256197;rs13459051;rs32335588;rs32112067;rs108035116;rs6250833;rs37505705;rs31762723;rs30763126;rs33494411;rs30766381;rs32452440;rs37131139
chr1_10775.8	chr1:133363187-133363437	Promoter (<=1kb)	dELS	Etnk2	7.76672	1	62.0915	60.0301	62.2187	132628058	128543687	133168278	Significant in baseline	No effect	20	20	11	11	rs30763126	rs32101230;rs49892902;rs8256197;rs13459051;rs32335588;rs32112067;rs108035116;rs6250833;rs37505705;rs31762723;rs30763126;rs33494411;rs30766381
chr1_10775.9	chr1:133363437-133363687	Promoter (<=1kb)	dELS	Etnk2	8.81818	1	62.0915	60.9326	62.2187	132628058	130863937	133168278	Significant in baseline	Protected effect	20	20	11	11	rs30763126	rs32335588;rs32112067;rs108035116;rs6250833;rs37505705;rs31762723;rs30763126;rs33494411;rs30766381
chr1_10776.3	chr1:133370389-133370639	Intron (ENSMUST00000135222.8/214253, intron 3 of 7)		Etnk2	4.60271	1	71.0952	60.9326	71.9878	158380674	130863937	163093547	Significant in baseline	No effect	20	20	11	11	rs33740307	rs32335588;rs32112067;rs108035116;rs6250833;rs37505705;rs31762723;rs30763126;rs33494411;rs30766381;rs32452440;rs37131139;rs13476119;rs49289788;rs36548506;rs37895110;rs3691222;rs33589350;rs33586240;rs6406033;rs46445754;rs31534627;rs215571652;rs13476137;rs13476138;rs49147137;rs107630249;rs3682831;rs13476148;rs31066093;rs31063456;rs31055515;rs32687429;rs32586240;rs31006935;rs31190083;rs13476163;rs30…
chr1_10778.4	chr1:133376162-133376412	Intron (ENSMUST00000135222.8/214253, intron 5 of 7)	dELS	Etnk2	8.15307	1	61.9643	60.9326	62.2187	132495600	130863937	133168278	Significant in baseline	No effect	19	19	12	12	rs31762723	rs32335588;rs32112067;rs108035116;rs6250833;rs37505705;rs31762723;rs30763126;rs33494411;rs30766381
chr1_10778.5	chr1:133376412-133376662	Intron (ENSMUST00000135222.8/214253, intron 5 of 7)		Sox13	5.57194	1	62.0915	60.0301	63.8825	132628058	128543687	138606530	Significant in baseline	No effect	20	20	11	11	rs30763126	rs32101230;rs49892902;rs8256197;rs13459051;rs32335588;rs32112067;rs108035116;rs6250833;rs37505705;rs31762723;rs30763126;rs33494411;rs30766381;rs32452440;rs37131139;rs13476119;rs49289788;rs36548506;rs37895110;rs3691222;rs33589350;rs33586240;rs6406033;rs46445754;rs31534627;rs215571652
chr1_10781.4	chr1:133379602-133379852	3' UTR	dELS	Sox13	3.88366	1	62.2187	54.4027	66.4935	133168278	107486168	145394499	Significant in baseline	No effect	20	20	11	11	rs30766381	rs31960226;rs32738873;rs31744083;rs47329570;rs31960159;rs13476045;rs45843892;rs31935680;rs3685919;rs6319405;rs3710646;rs30584583;rs51800183;rs48823920;rs30719160;rs31471077;rs30675648;rs32180662;rs30680977;rs32807094;rs30637341;rs32757674;rs32268077;rs30725178;rs30724278;rs30698282;rs3723088;rs3663708;rs31007558;rs30727085;rs48015801;rs230640887;rs237885247;rs48962291;rs213804272;rs31189732;rs470…
chr1_10781.4	chr1:133379602-133379852	3' UTR	dELS	Sox13	3.57202	18	18.5251	13.3379	22.3635	38865900	28296686	49935874	Significant in baseline	No effect	11	11	20	20	rs29625610	rs13483269;rs30215087;rs30307216;rs51473933;rs29823802;rs51184884;rs50325417;rs29672857;rs31601065;rs29955993;rs29671538;rs30123353;rs29965883;rs29585482;rs31645144;rs13483292;rs29983517;rs46074262;rs8255038;rs30113240;UNC180078727;rs47753524;rs6163326;rs29734378;rs30303188;rs30303457;rs29975748;rs29581636;rs31743172;rs29575950;rs30270060;rs31721232;rs13483310;rs31720381;rs29625610;rs29918934;rs4…
chr1_10787.1	chr1:133394713-133394963	Promoter (1-2kb)		Sox13	5.09041	1	62.0915	57.4639	63.1132	132628058	121148291	136537577	Significant in baseline	No effect	20	20	11	11	rs30763126	rs48015801;rs230640887;rs237885247;rs48962291;rs213804272;rs31189732;rs47085630;rs49565748;rs30561273;rs30785490;rs32612920;rs31573665;rs47328362;rs32769332;rs32013884;rs50349808;rs32811017;rs31348531;rs33889750;rs47026905;rs6263067;rs32558546;rs32101230;rs49892902;rs8256197;rs13459051;rs32335588;rs32112067;rs108035116;rs6250833;rs37505705;rs31762723;rs30763126;rs33494411;rs30766381;rs32452440;rs…
chr1_10810.2	chr1:133663279-133663529	Promoter (1-2kb)		Zc3h11a	4.17046	17	10.0119	8.73377	13.614	21686210	12085862	29303584	Significant in baseline	Protected effect	19	19	12	12	rs52562350	rs49702852;rs33169172;rs108375027;rs33518122;rs3662820;rs33637088;rs33220795;rs30924502;rs29499971;rs3654149;rs51863865;rs6181074;rs33314464;rs16783619;rs31589117;rs52562350;rs31862018;rs31423591;rs32518416;rs32170136;rs33864009;rs33668338;rs33570052;rs33641175;rs51376412;rs52488232;rs3659741;rs13459150;rs33464875;rs29536256;rs33317604;rs33130037;rs33216711;rs51921511;rs13482930;rs33669191;rs3362…
chr1_1082.2	chr1:23844057-23844307	Intron (ENSMUST00000063663.5/280645, intron 2 of 3)		Smap1	3.71746	19	22.4269	20.9117	24.3296	28403279	27531578	29981177	Significant in baseline	No effect	18	18	11	11	D19Msw029	rs30505802;D19Msw029;rs31010431;rs30817358;rs13483589
chr1_10858.2	chr1:133853213-133853463	Distal Intergenic		Optc	3.62861	6	60.342	54.0382	61.52	117480394	104841610	121303841	Significant in baseline	Protected effect	18	18	12	12	rs30672468	rs13478947;rs29924569;rs29871861;rs30710721;rs6178465;rs30118953;rs51881316;rs51673450;rs30365750;rs30171670;rs31001387;rs37005855;rs30712549;rs49219043;rs46276051;rs13478971;rs31412077;rs13478974;rs30914297;rs30122791;rs37516595;rs252954368;rs30850128;rs30318987;rs30853062;rs13478978;rs30613633;rs30499894;rs31001331;rs217928992;rs30869984;rs30955641;rs31504195;rs31506487;rs31506637;rs6204829;UNC…
chr1_10863.20	chr1:133890482-133890732	Distal Intergenic	pELS	Optc	4.94283	9	5.39929	4.60564	5.39929	24616290	22854061	24616290	Significant in baseline	No effect	16	16	15	15	rs6183014	rs30026335;rs6183014
chr1_10901.9	chr1:134045306-134045556	Intron (ENSMUST00000048183.7/14264, intron 2 of 2)		Fmod	4.08014	11	72.9034	66.2906	73.5514	117545132	111500000	118979412	Significant in baseline	No effect	20	20	11	11	rs51797794	Affy_PC11_111;Affy_PC11_113;rs29482544;rs48554492;rs29448501;rs46699550;rs50315212;rs13481249;rs29471238;rs27013085;rs13481251;rs50045009;rs50083450;rs52151267;rs13481252;rs50730255;rs51797794;D11Mit48;rs29447364;rs46221055;rs45879589
chr1_10909.1	chr1:134057693-134057943	Distal Intergenic		Fmod	3.79716	1	32.7764	12.4068	91.944	58115573	25237332	189170283	Significant in baseline	No effect	15	15	16	16	rs29655680	rs31567874;rs32245765;rs32487442;rs13475771;rs13475772;rs32249228;rs32331653;rs32086436;rs48222526;rs223334166;rs31670161;rs31134323;rs47868189;rs31600419;rs30514876;rs32110348;rs31590459;rs32372810;rs32684509;rs230225148;rs48664698;rs32760971;rs31818207;rs30598074;rs13475795;rs30849932;rs46323879;rs31518908;rs31710287;rs16808053;rs221967485;rs47717565;rs13475808;rs30604008;rs30525912;rs13475810;…
chr1_10912.1	chr1:134062444-134062694	Distal Intergenic	dELS	Btg2	4.2648	18	15.7044	13.3379	17.2469	32822886	28296686	35817591	Significant in baseline	Protected effect	12	12	19	19	rs29965883	rs13483269;rs30215087;rs30307216;rs51473933;rs29823802;rs51184884;rs50325417;rs29672857;rs31601065;rs29955993;rs29671538;rs30123353;rs29965883;rs29585482;rs31645144;rs13483292;rs29983517;rs46074262;rs8255038;rs30113240;UNC180078727;rs47753524;rs6163326;rs29734378
chr1_10939.8	chr1:134151797-134152047	Downstream (<=300bp)	CTCF-only,CTCF-bound	Chit1	3.77249	7	37.3458	27.4441	40.9581	70848220	48977065	74522856	Significant in baseline	No effect	20	20	11	11	rs31037523	rs32863866;rs48916182;rs31042866;rs213384118;rs32902400;rs31654490;rs50131576;rs47672774;rs3090660;rs229997718;rs30768844;rs38534556;rs39023048;rs50378197;rs36267659;rs32492875;rs31232197;rs46783773;rs32296887;rs31449642;rs32939481;rs31236409;rs31690069;rs48848336;rs32233442;rs49184954;rs32328305;rs32537380;rs13479268;rs32424606;rs6295848;rs227921453;rs13479276;rs31561885;rs48647025;rs50627052;rs…
chr1_10954.2	chr1:134204301-134204551	Intron (ENSMUST00000169927.1/11539, intron 1 of 2)	dELS	Mybph	5.164	1	62.499	60.9326	63.8825	135170068	130863937	138606530	Significant in baseline	No effect	21	21	9	9	rs49289788	rs32335588;rs32112067;rs108035116;rs6250833;rs37505705;rs31762723;rs30763126;rs33494411;rs30766381;rs32452440;rs37131139;rs13476119;rs49289788;rs36548506;rs37895110;rs3691222;rs33589350;rs33586240;rs6406033;rs46445754;rs31534627;rs215571652
chr1_10975.3	chr1:134241060-134241310	Distal Intergenic		Adora1	3.87106	18	41.149	38.7537	43.0086	68185097	65609710	68603409	Significant in baseline	No effect	19	19	9	9	rs29967647	rs3658391;rs46094763;rs29770804;rs49823091;rs52714787;rs46965069;D18Mit184;rs36626604;rs3716803;rs30212048;rs29557040;rs29774204;rs29967647;rs29539715;rs30216358;rs6346101;rs29984158;rs38772382
chr1_10993.6	chr1:134298049-134298299	3' UTR		Ppfia4	3.89371	8	49.795	41.7491	55.1964	116276566	102929123	123289925	Significant in baseline	No effect	14	14	15	15	rs33132295	rs13479958;rs46061215;rs33015720;rs33004646;rs6180306;rs52431037;rs52240807;rs30960224;rs6182338;rs13479970;rs33551061;rs31013353;rs33519536;rs49094676;rs50465429;rs31021623;rs31032628;rs3715791;rs13479975;UNC080532671;rs32928525;rs225424560;rs31084940;rs3656921;rs3662808;rs31158659;rs31161793;rs32674736;rs32780597;rs51217319;rs33570756;rs13479984;rs33110413;rs13479987;rs13479993;rs37325528;rs495…
chr1_11006.7	chr1:134329706-134329956	Promoter (2-3kb)		Ppfia4	3.43577	6	17.3394	1.342	20.6769	34195112	3266392	37652648	Significant in baseline	No effect	18	18	13	13	rs30318085	rs32426984;rs30759941;rs13478602;rs30654669;rs6180149;rs32448234;rs29924446;rs30754715;rs30860624;rs30715633;rs30223468;rs30450019;rs29922474;rs49698565;rs13478617;rs37214208;rs29978844;rs30957887;rs30272308;rs29912091;rs30952145;rs30845880;rs29926568;rs30033882;rs30518301;rs13478632;rs30710547;rs29829269;rs36857136;rs13478638;rs30704977;rs48624953;rs6198430;rs13478641;rs48722164;rs49311321;rs301…
chr1_11009.3	chr1:134339718-134339968	Distal Intergenic	dELS,CTCF-bound	Ppfia4	4.56828	11	57.2406	48.2369	59.0497	101250880	89612498	103177521	Significant in baseline	Protected effect	13	13	18	18	rs29422564	UNCHS031808;UNC20093627;JAX00030197;rs13481150;rs51608748;rs13481152;rs27076650;rs47255394;rs27061562;rs6247213;rs49776118;rs29387524;rs48129972;rs27074926;rs13481156;rs13481158;AffY_PC11_93;rs230648083;rs47752027;rs13481170;rs27105221;rs235845435;rs27052851;rs47508103;rs27086489;rs29435192;rs29445436;rs27026080;rs27026004;D11Mit99;rs13481185;rs27058443;rs29442012;rs27072810;rs3154925;rs3154428;r…
chr1_11011.1	chr1:134343497-134343747	Distal Intergenic	pELS,CTCF-bound	Tmem183a	3.49221	19	47.8255	47.0543	51.658	53103019	52562306	57214024	Significant in baseline	Protected effect	21	21	10	10	rs30619556	rs30414771;rs36776978;rs30899519;rs31132254;rs8275575;rs30619556;rs30352878;rs31013688;rs255053457;rs30963501;rs37555706;rs47782010;rs49416918;rs37133893;rs13483679;rs31086507;rs31161957;rs30663834;rs30511575;rs13483680;rs30419327;rs31016287;rs30771808;rs3654713;rs6192198;rs30699427;rs30611885;rs37882353;rs13483683;rs51466107;rs31045530;rs30370218;rs223675540;rs30372122;rs33851309;rs51242251;rs30…
chr1_11011.1	chr1:134343497-134343747	Distal Intergenic	pELS,CTCF-bound	Tmem183a	4.13835	9	58.2849	56.2194	58.2849	112427611	110638628	112427611	Significant in baseline	Protected effect	11	11	20	20	rs51222817	rs30374967;rs29644463;rs30181090;rs49247490;rs29917593;rs30178651;rs33324612;rs48021219;rs51102891;rs29888751;rs6248694;rs30080851;rs33343794;rs49104667;rs51222817
chr1_11041.1	chr1:134637895-134638145	Distal Intergenic		Syt2	4.09364	15	15.619	13.5537	17.5657	28302726	19105256	31218232	Significant in baseline	No effect	13	13	15	15	rs32152729	rs3680788;rs32868341;rs37629956;rs39129885;rs13482486;rs31910399;rs31915734;rs36551679;rs31825135;rs52344096;rs13482490;rs32936141;rs32931844;rs32152729;rs13482497;rs253158222;rs48427909;rs37136498;rs13482498;rs108718789;rs3702361;rs31705252;rs241073119;rs6352269;UNC150507742;rs32197799;rs32478382
chr1_11041.2	chr1:134638145-134638395	Distal Intergenic		Syt2	4.04098	1	64.2701	60.9326	66.8771	139521091	130863937	146870515	Significant in baseline	No effect	23	23	8	8	rs13476138	rs32335588;rs32112067;rs108035116;rs6250833;rs37505705;rs31762723;rs30763126;rs33494411;rs30766381;rs32452440;rs37131139;rs13476119;rs49289788;rs36548506;rs37895110;rs3691222;rs33589350;rs33586240;rs6406033;rs46445754;rs31534627;rs215571652;rs13476137;rs13476138;rs49147137;rs107630249;rs3682831;rs13476148;rs31066093;rs31063456;rs31055515;rs32687429;rs32586240;rs31006935;rs31190083;rs13476163
chr1_11045.1	chr1:134646099-134646349	Promoter (<=1kb)		Syt2	4.11423	16	14.1142	11.6505	15.4803	26422169	24175686	27062881	Significant in baseline	No effect	21	21	10	10	rs48262135	rs4165440;rs48262135;rs4165503
chr1_11065.3	chr1:134704695-134704945	Intron (ENSMUST00000187725.6/20980, intron 1 of 2)		Syt2	4.20564	14	49.087	48.4489	50.4015	117936145	117038077	118537399	Significant in baseline	No effect	15	15	15	15	rs30438807	rs3671398;rs30893914;rs6286809;rs3711767;rs30438807;rs30259301;rs49879578
chr1_11080.1	chr1:134736045-134736295	Intron (ENSMUST00000187725.6/20980, intron 1 of 2)		Syt2	8.82788	1	63.1132	62.3459	63.8825	136537577	133975583	138606530	Significant in baseline	No effect	22	22	9	9	rs33589350	rs37131139;rs13476119;rs49289788;rs36548506;rs37895110;rs3691222;rs33589350;rs33586240;rs6406033;rs46445754;rs31534627;rs215571652
chr1_11083.1	chr1:134741614-134741864	Exon (ENSMUST00000187725.6/20980, exon 3 of 3)	dELS,CTCF-bound	Syt2	3.30153	17	36.2836	29.8171	40.1567	67101682	57085978	70920549	Significant in baseline	No effect	21	21	10	10	rs3684212	rs46754061;rs33484083;rs33169019;rs52285176;rs13483057;rs48193345;rs33462479;rs33352463;UNC170815693;rs33272796;rs45849520;rs49543873;rs29507967;rs13483071;rs33317268;rs29516233;rs47234155;rs29519227;rs6185805;rs13483077;rs51630640;rs48275627;rs33607460;rs29525970;rs33532225;rs3684212;rs33373369;rs29513371;rs13483081;rs33398088;rs48780602;rs47022171;rs3666819;rs29523449;rs51337662;rs13483086;rs48…
chr1_11085.8	chr1:134746740-134746990	Exon (ENSMUST00000188842.6/20980, exon 9 of 10)		Syt2	4.2869	1	19.7778	17.084	20.4159	38225635	32343834	39140420	Significant in baseline	No effect	18	18	13	13	rs32988364	rs30598074;rs13475795;rs30849932;rs46323879;rs31518908;rs31710287;rs16808053;rs221967485;rs47717565;rs13475808;rs30604008;rs30525912;rs13475810;rs13475816;rs32180312;rs31935537;rs32551229;rs32942136;rs32635513;rs3705697;Affy_10345622;Affy_5433680;rs32988364;rs31528685;rs30611861;rs31574517;rs30868358;rs31440687
chr1_11093.2	chr1:134759008-134759258	3' UTR	dELS	Ppp1r12b	4.48571	6	15.7765	15.2656	17.3394	32303315	32207574	34195112	Significant in baseline	No effect	18	18	13	13	rs30319084	rs30162995;rs29966306;rs13478694;rs30468068;rs30319084;rs3678887;rs3693410;rs30654706;rs47901097;rs49265509;rs29960521;rs50136596;rs30318085
chr1_11118.1	chr1:134865583-134865833	Exon (ENSMUST00000045665.12/329251, exon 13 of 24)		Ppp1r12b	5.52744	1	62.2187	60.9326	63.8825	133168278	130863937	138606530	Significant in baseline	Protected effect	20	20	11	11	rs30766381	rs32335588;rs32112067;rs108035116;rs6250833;rs37505705;rs31762723;rs30763126;rs33494411;rs30766381;rs32452440;rs37131139;rs13476119;rs49289788;rs36548506;rs37895110;rs3691222;rs33589350;rs33586240;rs6406033;rs46445754;rs31534627;rs215571652
chr1_11120.1	chr1:134874435-134874685	Intron (ENSMUST00000045665.12/329251, intron 10 of 23)		Ppp1r12b	7.01534	1	62.8588	62.3459	63.1132	135562623	133975583	136537577	Significant in baseline	No effect	22	22	9	9	rs37895110	rs37131139;rs13476119;rs49289788;rs36548506;rs37895110;rs3691222;rs33589350
chr1_11133.2	chr1:134953058-134953308	Promoter (2-3kb)		Ppp1r12b	4.08263	1	63.7553	62.6023	63.8825	138573759	135170068	138606530	Significant in baseline	No effect	21	21	10	10	rs31534627	rs49289788;rs36548506;rs37895110;rs3691222;rs33589350;rs33586240;rs6406033;rs46445754;rs31534627;rs215571652
chr1_11185.20	chr1:135129847-135130097	Promoter (1-2kb)	dELS	Ptprv	4.80098	1	63.2404	62.3459	64.5265	136554384	133975583	139806775	Significant in baseline	No effect	21	21	10	10	rs33586240	rs37131139;rs13476119;rs49289788;rs36548506;rs37895110;rs3691222;rs33589350;rs33586240;rs6406033;rs46445754;rs31534627;rs215571652;rs13476137;rs13476138;rs49147137;rs107630249
chr1_11185.7	chr1:135126597-135126847	Promoter (1-2kb)	dELS	Ptprv	4.11038	1	63.2404	57.4639	64.5265	136554384	121148291	139806775	Significant in baseline	No effect	21	21	10	10	rs33586240	rs48015801;rs230640887;rs237885247;rs48962291;rs213804272;rs31189732;rs47085630;rs49565748;rs30561273;rs30785490;rs32612920;rs31573665;rs47328362;rs32769332;rs32013884;rs50349808;rs32811017;rs31348531;rs33889750;rs47026905;rs6263067;rs32558546;rs32101230;rs49892902;rs8256197;rs13459051;rs32335588;rs32112067;rs108035116;rs6250833;rs37505705;rs31762723;rs30763126;rs33494411;rs30766381;rs32452440;rs…
chr1_11185.8	chr1:135126847-135127097	Promoter (1-2kb)	dELS	Ptprv	4.1321	1	62.499	57.4639	63.8825	135170068	121148291	138606530	Significant in baseline	No effect	21	21	9	9	rs49289788	rs48015801;rs230640887;rs237885247;rs48962291;rs213804272;rs31189732;rs47085630;rs49565748;rs30561273;rs30785490;rs32612920;rs31573665;rs47328362;rs32769332;rs32013884;rs50349808;rs32811017;rs31348531;rs33889750;rs47026905;rs6263067;rs32558546;rs32101230;rs49892902;rs8256197;rs13459051;rs32335588;rs32112067;rs108035116;rs6250833;rs37505705;rs31762723;rs30763126;rs33494411;rs30766381;rs32452440;rs…
chr1_11190.3	chr1:135137544-135137794	Exon (ENSMUST00000187985.6/320139, exon 7 of 10)		Ptpn7	3.88954	7	4.42258	2.46409	5.46043	11775206	6011490	14544160	Significant in baseline	No effect	18	18	12	12	rs13479124	rs37227876;rs31568496;rs31427805;rs32197605;rs13479124;rs31227373;rs32264975;rs32395390;rs31417211;rs32532297;rs31007463;rs32016537
chr1_11203.2	chr1:135160631-135160881	3' UTR		Arl8a	3.63203	5	13.904	13.1207	19.8309	27285288	25445855	39069280	Significant in baseline	No effect	16	16	14	14	rs32179786	rs33497497;rs33462162;rs224949622;rs32179786;rs29818570;rs32495599;rs52525819;rs29779004;D5Mit388;rs33680477;rs13478175;rs33759957;rs33647566;rs29682924;UNC8930200;rs29580733;rs33657473;rs46581185;rs6408534;rs32623012;rs29683355;rs33417710;rs32605771;rs259656301;rs13478184;rs32571576;rs32573674;rs29681229;rs33192205;rs47842264
chr1_11206.3	chr1:135169970-135170220	Promoter (2-3kb)	dELS	Gpr37l1	5.87531	1	62.499	62.3459	64.5265	135170068	133975583	139806775	Significant in baseline	No effect	21	21	9	9	rs49289788	rs37131139;rs13476119;rs49289788;rs36548506;rs37895110;rs3691222;rs33589350;rs33586240;rs6406033;rs46445754;rs31534627;rs215571652;rs13476137;rs13476138;rs49147137;rs107630249
chr1_11216.1	chr1:135206748-135206998	Distal Intergenic		Gpr37l1	3.81644	1	63.2404	60.9326	64.5265	136554384	130863937	139806775	Significant in baseline	Protected effect	21	21	10	10	rs33586240	rs32335588;rs32112067;rs108035116;rs6250833;rs37505705;rs31762723;rs30763126;rs33494411;rs30766381;rs32452440;rs37131139;rs13476119;rs49289788;rs36548506;rs37895110;rs3691222;rs33589350;rs33586240;rs6406033;rs46445754;rs31534627;rs215571652;rs13476137;rs13476138;rs49147137;rs107630249
chr1_11245.12	chr1:135366287-135366537	3' UTR		Shisa4	4.16935	18	42.096	40.4294	43.9071	68189477	68185097	69862165	Significant in baseline	No effect	21	21	10	10	rs29539715	rs29967647;rs29539715;rs30216358;rs6346101;rs29984158;rs38772382;rs36370782;rs38013414;rs3718618;rs50446650;rs30108189
chr1_11245.5	chr1:135364537-135364787	Exon (ENSMUST00000059352.2/93689, exon 2 of 3)		Shisa4	3.89659	6	8.51081	4.80069	10.9609	18110893	15421102	24108037	Significant in baseline	No effect	18	18	13	13	rs50512312	rs30704977;rs48624953;rs6198430;rs13478641;rs48722164;rs49311321;rs30127354;rs33539208;rs30169246;rs33565077;rs13472831;rs50057067;rs30913933;rs33569321;rs49648539;rs3023064;rs29876938;rs33587477;rs3655269;rs50512312;rs36311871;Affy_PC6_19;Affy_PC6_22;rs33760701;rs30460491;rs38759439;rs30305830
chr1_11248.19	chr1:135382291-135382541	3' UTR		Ipo9	4.01497	1	66.8771	66.2371	70.968	146870515	145376780	158373251	Significant in baseline	No effect	23	23	8	8	rs13476163	rs31063456;rs31055515;rs32687429;rs32586240;rs31006935;rs31190083;rs13476163;rs30991744;rs30769516;rs3711440;rs6411476;rs3680050;rs31640585;rs13476175;rs13476177;rs31897662;rs31230953;rs31226073;rs31206241;rs31201062;rs6267646;rs31180473;rs32707440;rs31173184;rs13476184;rs231234050;rs47680477;rs37068894;rs32571301;rs262053553;rs13476187;rs32380880;rs220024233;rs32238353;rs30592448;rs6181202;rs235…
chr1_11249.4	chr1:135386935-135387185	Promoter (<=1kb)		Ipo9	3.99166	1	62.986	62.3459	63.8825	136317917	133975583	138606530	No baseline effect	Protected effect	21	21	9	9	rs3691222	rs37131139;rs13476119;rs49289788;rs36548506;rs37895110;rs3691222;rs33589350;rs33586240;rs6406033;rs46445754;rs31534627;rs215571652
chr1_11249.5	chr1:135387185-135387435	Promoter (<=1kb)		Ipo9	4.69306	1	62.6023	62.3459	63.8825	135170068	133975583	138606530	No baseline effect	Protected effect	22	22	9	9	rs49289788	rs37131139;rs13476119;rs49289788;rs36548506;rs37895110;rs3691222;rs33589350;rs33586240;rs6406033;rs46445754;rs31534627;rs215571652
chr1_11258.1	chr1:135431280-135431530	Promoter (<=1kb)		Ipo9	4.39279	17	58.8246	57.0073	58.8246	91701024	90381205	91701024	Significant in baseline	No effect	11	11	20	20	rs3711932	rs33180097;rs50100822;rs3696168;rs33264515;rs33266347;rs50707939;rs48280013;rs3662979;rs6288047;rs33886537;rs33370949;rs3711932
chr1_11261.2	chr1:135435258-135435508	3' UTR		Ipo9	4.66958	1	62.986	60.4177	63.8825	136317917	128544902	138606530	Significant in baseline	No effect	21	21	9	9	rs3691222	rs49892902;rs8256197;rs13459051;rs32335588;rs32112067;rs108035116;rs6250833;rs37505705;rs31762723;rs30763126;rs33494411;rs30766381;rs32452440;rs37131139;rs13476119;rs49289788;rs36548506;rs37895110;rs3691222;rs33589350;rs33586240;rs6406033;rs46445754;rs31534627;rs215571652
chr1_11266.3	chr1:135449996-135450246	Exon (ENSMUST00000040599.14/215690, exon 27 of 30)		Nav1	5.16654	1	63.2404	62.3459	63.8825	136554384	133975583	138606530	Significant in baseline	Up effect	21	21	10	10	rs33586240	rs37131139;rs13476119;rs49289788;rs36548506;rs37895110;rs3691222;rs33589350;rs33586240;rs6406033;rs46445754;rs31534627;rs215571652
chr1_11275.2	chr1:135463850-135464100	Exon (ENSMUST00000040599.14/215690, exon 12 of 30)		Nav1	3.92794	1	62.6023	1.499	63.8825	135170068	3010274	138606530	No baseline effect	No effect	22	22	9	9	rs49289788	rs31443144;rs6269442;rs32285189;rs258367496;rs32430919;rs36251697;rs30658298;rs51852623;rs31879829;rs36742481;rs6365999;rs13470446;Affy_10344635;rs6376963;rs30847416;rs32759286;rs31625087;rs31716357;rs3677817;rs47937185;rs32140280;rs32096391;rs47493511;rs31190522;rs6298633;rs31362910;rs31878990;rs32186775;rs31868650;rs6360236;rs32740138;rs249962268_D1Mit1;rs30991578;rs32347261;rs36585555;rs304772…
chr1_11276.1	chr1:135464443-135464693	Promoter (2-3kb)		Nav1	4.66869	1	63.8825	62.6023	64.5265	138606530	135170068	139806775	Significant in baseline	No effect	21	21	10	10	rs215571652	rs49289788;rs36548506;rs37895110;rs3691222;rs33589350;rs33586240;rs6406033;rs46445754;rs31534627;rs215571652;rs13476137;rs13476138;rs49147137;rs107630249
chr1_11289.14	chr1:135510858-135511108	Promoter (<=1kb)	pELS,CTCF-bound	Nav1	3.61782	1	18.3563	17.9746	19.5214	37632448	35723979	38128270	Significant in baseline	No effect	20	20	11	11	rs32180312	rs30604008;rs30525912;rs13475810;rs13475816;rs32180312;rs31935537;rs32551229;rs32942136;rs32635513;rs3705697;Affy_10345622;Affy_5433680
chr1_11289.8	chr1:135509358-135509608	Promoter (<=1kb)	dELS	Nav1	3.82847	17	17.1066	11.0376	18.1465	35021441	24290582	40571110	Significant in baseline	No effect	24	24	7	7	UNCHS044198	rs51376412;rs52488232;rs3659741;rs13459150;rs33464875;rs29536256;rs33317604;rs33130037;rs33216711;rs51921511;rs13482930;rs33669191;rs33621301;rs51683183;JAX00074732;rs6397584;rs46175605;rs13482934;UNCHS043985;UNC27739687;rs46183100;rs33319083;rs3693494;rs51195687;rs13482942;rs33566637;rs49943866;rs48282767;rs33082005;rs261335110;rs13482947;rs33212286;rs6242153;rs13482950;rs3672987;rs33106158;rs33…
chr1_11308.1	chr1:135544309-135544559	Intron (ENSMUST00000040599.14/215690, intron 1 of 29)		Nav1	5.26617	1	63.2404	62.6023	63.8825	136554384	135170068	138606530	Significant in baseline	No effect	21	21	10	10	rs33586240	rs49289788;rs36548506;rs37895110;rs3691222;rs33589350;rs33586240;rs6406033;rs46445754;rs31534627;rs215571652
chr1_11308.2	chr1:135544559-135544809	Intron (ENSMUST00000040599.14/215690, intron 1 of 29)	dELS,CTCF-bound	Nav1	4.78342	1	63.2404	62.3459	63.8825	136554384	133975583	138606530	Significant in baseline	No effect	21	21	10	10	rs33586240	rs37131139;rs13476119;rs49289788;rs36548506;rs37895110;rs3691222;rs33589350;rs33586240;rs6406033;rs46445754;rs31534627;rs215571652
chr1_11308.3	chr1:135544809-135545059	Intron (ENSMUST00000040599.14/215690, intron 1 of 29)	dELS,CTCF-bound	Nav1	4.65025	1	63.2404	61.4534	64.5265	136554384	131595730	139806775	Significant in baseline	No effect	21	21	10	10	rs33586240	rs108035116;rs6250833;rs37505705;rs31762723;rs30763126;rs33494411;rs30766381;rs32452440;rs37131139;rs13476119;rs49289788;rs36548506;rs37895110;rs3691222;rs33589350;rs33586240;rs6406033;rs46445754;rs31534627;rs215571652;rs13476137;rs13476138;rs49147137;rs107630249
chr1_11308.4	chr1:135545059-135545309	Intron (ENSMUST00000040599.14/215690, intron 1 of 29)	dELS,CTCF-bound	Nav1	3.55597	1	63.2404	52.3572	87.3323	136554384	99889757	185177962	Significant in baseline	No effect	21	21	10	10	rs33586240	rs37486156;rs36618375;rs13476012;rs30966514;rs51210174;rs13476025;rs31806216;rs13476030;rs32565357;rs32697536;rs30506144;rs30488981;rs30487561;rs30484039;rs47647099;rs49762567;rs3680216;rs31994637;rs31960226;rs32738873;rs31744083;rs47329570;rs31960159;rs13476045;rs45843892;rs31935680;rs3685919;rs6319405;rs3710646;rs30584583;rs51800183;rs48823920;rs30719160;rs31471077;rs30675648;rs32180662;rs30680…
chr1_11309.2	chr1:135546091-135546341	Intron (ENSMUST00000040599.14/215690, intron 1 of 29)	dELS,CTCF-bound	Nav1	3.7968	1	61.9643	60.9326	66.2371	132495600	130863937	145376780	Significant in baseline	No effect	19	19	12	12	rs31762723	rs32335588;rs32112067;rs108035116;rs6250833;rs37505705;rs31762723;rs30763126;rs33494411;rs30766381;rs32452440;rs37131139;rs13476119;rs49289788;rs36548506;rs37895110;rs3691222;rs33589350;rs33586240;rs6406033;rs46445754;rs31534627;rs215571652;rs13476137;rs13476138;rs49147137;rs107630249;rs3682831;rs13476148;rs31066093;rs31063456
chr1_11333.16	chr1:135585425-135585675	Promoter (<=1kb)	dELS,CTCF-bound	Nav1	4.4938	1	20.1595	17.4657	21.5707	39020746	34536447	39521927	Significant in baseline	No effect	18	18	13	13	rs30868358	rs31710287;rs16808053;rs221967485;rs47717565;rs13475808;rs30604008;rs30525912;rs13475810;rs13475816;rs32180312;rs31935537;rs32551229;rs32942136;rs32635513;rs3705697;Affy_10345622;Affy_5433680;rs32988364;rs31528685;rs30611861;rs31574517;rs30868358;rs31440687;rs51951745;rs31449667;rs33132305;rs30551147;rs13475821
chr1_11348.7	chr1:135616317-135616567	Intron (ENSMUST00000190298.7/215690, intron 1 of 30)		Nav1	4.03681	1	61.9643	58.4936	64.5265	132495600	124541277	139806775	Significant in baseline	No effect	19	19	12	12	rs31762723	rs47085630;rs49565748;rs30561273;rs30785490;rs32612920;rs31573665;rs47328362;rs32769332;rs32013884;rs50349808;rs32811017;rs31348531;rs33889750;rs47026905;rs6263067;rs32558546;rs32101230;rs49892902;rs8256197;rs13459051;rs32335588;rs32112067;rs108035116;rs6250833;rs37505705;rs31762723;rs30763126;rs33494411;rs30766381;rs32452440;rs37131139;rs13476119;rs49289788;rs36548506;rs37895110;rs3691222;rs3358…
chr1_11353.2	chr1:135623329-135623579	Intron (ENSMUST00000190298.7/215690, intron 1 of 30)	DNase-H3K4me3	Nav1	7.87112	1	62.6023	62.3459	63.1132	135170068	133975583	136537577	Significant in baseline	Up effect	22	22	9	9	rs49289788	rs37131139;rs13476119;rs49289788;rs36548506;rs37895110;rs3691222;rs33589350
chr1_11358.4	chr1:135635262-135635512	Intron (ENSMUST00000190298.7/215690, intron 1 of 30)		Nav1	3.78254	1	62.3459	56.9531	67.9028	133975583	120061123	151271465	Significant in baseline	Protected effect	21	21	10	10	rs37131139	rs3723088;rs3663708;rs31007558;rs30727085;rs48015801;rs230640887;rs237885247;rs48962291;rs213804272;rs31189732;rs47085630;rs49565748;rs30561273;rs30785490;rs32612920;rs31573665;rs47328362;rs32769332;rs32013884;rs50349808;rs32811017;rs31348531;rs33889750;rs47026905;rs6263067;rs32558546;rs32101230;rs49892902;rs8256197;rs13459051;rs32335588;rs32112067;rs108035116;rs6250833;rs37505705;rs31762723;rs30…
chr1_11358.5	chr1:135635512-135635762	Intron (ENSMUST00000190298.7/215690, intron 1 of 30)		Nav1	4.24344	1	62.986	54.4027	66.2371	136317917	107486168	145376780	Significant in baseline	No effect	21	21	9	9	rs3691222	rs31960226;rs32738873;rs31744083;rs47329570;rs31960159;rs13476045;rs45843892;rs31935680;rs3685919;rs6319405;rs3710646;rs30584583;rs51800183;rs48823920;rs30719160;rs31471077;rs30675648;rs32180662;rs30680977;rs32807094;rs30637341;rs32757674;rs32268077;rs30725178;rs30724278;rs30698282;rs3723088;rs3663708;rs31007558;rs30727085;rs48015801;rs230640887;rs237885247;rs48962291;rs213804272;rs31189732;rs470…
chr1_11377.3	chr1:135693989-135694239	Distal Intergenic		Nav1	5.01287	1	62.2187	58.4936	63.8825	133168278	124541277	138606530	Significant in baseline	No effect	20	20	11	11	rs30766381	rs47085630;rs49565748;rs30561273;rs30785490;rs32612920;rs31573665;rs47328362;rs32769332;rs32013884;rs50349808;rs32811017;rs31348531;rs33889750;rs47026905;rs6263067;rs32558546;rs32101230;rs49892902;rs8256197;rs13459051;rs32335588;rs32112067;rs108035116;rs6250833;rs37505705;rs31762723;rs30763126;rs33494411;rs30766381;rs32452440;rs37131139;rs13476119;rs49289788;rs36548506;rs37895110;rs3691222;rs3358…
chr1_11377.4	chr1:135694239-135694489	Distal Intergenic		Nav1	5.65905	1	62.3459	60.9326	64.5265	133975583	130863937	139806775	Significant in baseline	No effect	21	21	10	10	rs37131139	rs32335588;rs32112067;rs108035116;rs6250833;rs37505705;rs31762723;rs30763126;rs33494411;rs30766381;rs32452440;rs37131139;rs13476119;rs49289788;rs36548506;rs37895110;rs3691222;rs33589350;rs33586240;rs6406033;rs46445754;rs31534627;rs215571652;rs13476137;rs13476138;rs49147137;rs107630249
chr1_11391.2	chr1:135728722-135728972	Promoter (<=1kb)	pELS	Csrp1	4.59946	16	44.5154	40.9294	46.462	85087205	74917703	86347785	Significant in baseline	No effect	14	14	17	17	rs4212088	rs4205157;rs47428493;rs47669684;rs4205934;rs4206049;rs4206093;rs4206149;rs33382693;rs48075235;rs4206327;rs4206623;rs48723924;rs4206648;rs4207501;rs50056013;rs4207522;rs46091334;rs47201096;rs47289004;rs4207980;rs4208948;rs4209059;rs4209236;rs4210205;rs4210322;rs4211364;rs4211498;rs4211512;rs47735462;rs4211731;rs32877757;rs49027053;rs4211872;rs262440150;rs4211958;rs4212088;rs4212238;rs4212244;rs527…
chr1_11397.1	chr1:135735252-135735502	Intron (ENSMUST00000097561.8/13007, intron 1 of 5)	dELS	Csrp1	3.59226	9	48.3813	45.0517	49.9198	101324159	95329897	103625468	Significant in baseline	No effect	9	9	22	22	rs50803618	rs37368621;rs30487838;rs29788347;rs45751893;rs30089102;rs29684038;rs3705403;rs33125354;UNC090190668;rs46959794;rs33725243;rs13480365;rs30283520;rs29838811;rs29645355;rs30095707;rs29597683;rs30480714;rs36301893;rs37765518;rs39584143;rs47991900;rs36372858;rs36747925;rs30040183;rs29737427;rs51076323;rs13480377;rs50803618;rs51742549;rs51440803;rs3688878;rs30229098;rs30362659;rs50186326;rs33235675;rs3…
chr1_11406.5	chr1:135757378-135757628	Distal Intergenic		Phlda3	4.24908	1	62.6023	60.4177	64.5265	135170068	128544902	139806775	Significant in baseline	No effect	22	22	9	9	rs49289788	rs49892902;rs8256197;rs13459051;rs32335588;rs32112067;rs108035116;rs6250833;rs37505705;rs31762723;rs30763126;rs33494411;rs30766381;rs32452440;rs37131139;rs13476119;rs49289788;rs36548506;rs37895110;rs3691222;rs33589350;rs33586240;rs6406033;rs46445754;rs31534627;rs215571652;rs13476137;rs13476138;rs49147137;rs107630249
chr1_11412.2	chr1:135776040-135776290	Distal Intergenic		Tnni1	3.87682	1	62.986	3.16082	66.2371	136317917	5025197	145376780	Significant in baseline	Protected effect	21	21	9	9	rs3691222	rs30847416;rs32759286;rs31625087;rs31716357;rs3677817;rs47937185;rs32140280;rs32096391;rs47493511;rs31190522;rs6298633;rs31362910;rs31878990;rs32186775;rs31868650;rs6360236;rs32740138;rs249962268_D1Mit1;rs30991578;rs32347261;rs36585555;rs30477285;rs32223513;rs45688852;rs48988706;rs31710291;rs31794283;rs6296049;rs32381514;rs31577697;rs30996958;rs31574495;rs32016169;rs6291839;rs32105394;rs3088964;r…
chr1_11420.7	chr1:135793546-135793796	Intron (ENSMUST00000132795.7/21952, intron 2 of 6)	dELS	Tnni1	4.02098	1	62.2187	53.6334	64.5265	133168278	106321454	139806775	Significant in baseline	No effect	20	20	11	11	rs30766381	rs30487561;rs30484039;rs47647099;rs49762567;rs3680216;rs31994637;rs31960226;rs32738873;rs31744083;rs47329570;rs31960159;rs13476045;rs45843892;rs31935680;rs3685919;rs6319405;rs3710646;rs30584583;rs51800183;rs48823920;rs30719160;rs31471077;rs30675648;rs32180662;rs30680977;rs32807094;rs30637341;rs32757674;rs32268077;rs30725178;rs30724278;rs30698282;rs3723088;rs3663708;rs31007558;rs30727085;rs4801580…
chr1_11420.8	chr1:135793796-135794046	Intron (ENSMUST00000132795.7/21952, intron 2 of 6)	dELS	Tnni1	4.3734	1	63.2404	60.9326	64.2701	136554384	130863937	139521091	Significant in baseline	No effect	21	21	10	10	rs33586240	rs32335588;rs32112067;rs108035116;rs6250833;rs37505705;rs31762723;rs30763126;rs33494411;rs30766381;rs32452440;rs37131139;rs13476119;rs49289788;rs36548506;rs37895110;rs3691222;rs33589350;rs33586240;rs6406033;rs46445754;rs31534627;rs215571652;rs13476137;rs13476138
chr1_11420.9	chr1:135794046-135794296	Intron (ENSMUST00000132795.7/21952, intron 2 of 6)	dELS	Tnni1	3.88858	1	62.499	60.9326	64.5265	135170068	130863937	139806775	Significant in baseline	No effect	21	21	9	9	rs49289788	rs32335588;rs32112067;rs108035116;rs6250833;rs37505705;rs31762723;rs30763126;rs33494411;rs30766381;rs32452440;rs37131139;rs13476119;rs49289788;rs36548506;rs37895110;rs3691222;rs33589350;rs33586240;rs6406033;rs46445754;rs31534627;rs215571652;rs13476137;rs13476138;rs49147137;rs107630249
chr1_11424.4	chr1:135799637-135799887	Promoter (<=1kb)		Tnni1	3.8981	17	13.614	10.7832	14.1348	29303584	23185670	29874146	Significant in baseline	No effect	23	23	8	8	rs33319083	rs33668338;rs33570052;rs33641175;rs51376412;rs52488232;rs3659741;rs13459150;rs33464875;rs29536256;rs33317604;rs33130037;rs33216711;rs51921511;rs13482930;rs33669191;rs33621301;rs51683183;JAX00074732;rs6397584;rs46175605;rs13482934;UNCHS043985;UNC27739687;rs46183100;rs33319083;rs3693494;rs51195687
chr1_1143.2	chr1:24372765-24373015	Intron (ENSMUST00000144297.1/12823, intron 5 of 39)		Col19a1	3.69794	14	48.7034	47.9341	50.7832	117688529	116006786	118814469	Significant in baseline	No effect	15	15	14	14	rs6286809	rs3722416;rs30192076;rs3671398;rs30893914;rs6286809;rs3711767;rs30438807;rs30259301;rs49879578;rs30553510;rs13482393;rs30152734
chr1_11443.4	chr1:135834136-135834386	Promoter (1-2kb)	dELS,CTCF-bound	Tnnt2	4.15438	3	22.6611	21.2293	24.0945	54423171	53246203	55027501	Significant in baseline	No effect	15	15	16	16	rs30480648	rs227777266;rs13477113;rs30374445;rs30400781;rs30450303;rs30465721;rs30014314;rs30469949;rs30480648;rs30519692;rs30942882;rs30832579;rs30529527;rs30535654
chr1_11443.5	chr1:135834386-135834636	Promoter (1-2kb)	dELS; dELS,CTCF-bound	Tnnt2	5.49613	1	62.2187	58.4936	63.8825	133168278	124541277	138606530	Significant in baseline	No effect	20	20	11	11	rs30766381	rs47085630;rs49565748;rs30561273;rs30785490;rs32612920;rs31573665;rs47328362;rs32769332;rs32013884;rs50349808;rs32811017;rs31348531;rs33889750;rs47026905;rs6263067;rs32558546;rs32101230;rs49892902;rs8256197;rs13459051;rs32335588;rs32112067;rs108035116;rs6250833;rs37505705;rs31762723;rs30763126;rs33494411;rs30766381;rs32452440;rs37131139;rs13476119;rs49289788;rs36548506;rs37895110;rs3691222;rs3358…
chr1_11443.6	chr1:135834636-135834886	Promoter (1-2kb)	dELS	Tnnt2	5.00533	1	62.499	60.0301	63.8825	135170068	128543687	138606530	Significant in baseline	No effect	21	21	9	9	rs49289788	rs32101230;rs49892902;rs8256197;rs13459051;rs32335588;rs32112067;rs108035116;rs6250833;rs37505705;rs31762723;rs30763126;rs33494411;rs30766381;rs32452440;rs37131139;rs13476119;rs49289788;rs36548506;rs37895110;rs3691222;rs33589350;rs33586240;rs6406033;rs46445754;rs31534627;rs215571652
chr1_11446.2	chr1:135840676-135840926	Promoter (<=1kb)		Tnnt2	6.44404	1	63.1132	61.4534	63.8825	136537577	131595730	138606530	Significant in baseline	Protected effect	22	22	9	9	rs33589350	rs108035116;rs6250833;rs37505705;rs31762723;rs30763126;rs33494411;rs30766381;rs32452440;rs37131139;rs13476119;rs49289788;rs36548506;rs37895110;rs3691222;rs33589350;rs33586240;rs6406033;rs46445754;rs31534627;rs215571652
chr1_11446.3	chr1:135840926-135841176	Promoter (<=1kb)	dELS,CTCF-bound	Tnnt2	5.08339	1	62.499	60.9326	63.8825	135170068	130863937	138606530	Significant in baseline	Protected effect	21	21	9	9	rs49289788	rs32335588;rs32112067;rs108035116;rs6250833;rs37505705;rs31762723;rs30763126;rs33494411;rs30766381;rs32452440;rs37131139;rs13476119;rs49289788;rs36548506;rs37895110;rs3691222;rs33589350;rs33586240;rs6406033;rs46445754;rs31534627;rs215571652
chr1_11446.3	chr1:135840926-135841176	Promoter (<=1kb)	dELS,CTCF-bound	Tnnt2	4.0928	13	11.27	9.84855	13.534	35880750	32450477	39658241	Significant in baseline	Protected effect	14	14	17	17	rs29235128	rs29497118;rs29230398;rs3693223;rs3707097;rs30054307;rs29231898;rs29919533;rs29532149;rs13481760;rs51458966;rs4229685;rs29235128;rs6200652;rs29590965;rs30095056;rs30076920;rs29990564
chr1_11469.1	chr1:135899938-135900188	Intron (ENSMUST00000027667.12/18772, intron 2 of 13)	dELS	Pkp1	4.26639	1	67.1335	54.4027	67.9028	147054880	107486168	151271465	Significant in baseline	No effect	24	24	7	7	rs30769516	rs31960226;rs32738873;rs31744083;rs47329570;rs31960159;rs13476045;rs45843892;rs31935680;rs3685919;rs6319405;rs3710646;rs30584583;rs51800183;rs48823920;rs30719160;rs31471077;rs30675648;rs32180662;rs30680977;rs32807094;rs30637341;rs32757674;rs32268077;rs30725178;rs30724278;rs30698282;rs3723088;rs3663708;rs31007558;rs30727085;rs48015801;rs230640887;rs237885247;rs48962291;rs213804272;rs31189732;rs470…
chr1_11472.4	chr1:135911615-135911865	Intron (ENSMUST00000027667.12/18772, intron 1 of 13)		Pkp1	4.07046	1	62.6023	60.9326	64.5265	135170068	130863937	139806775	Significant in baseline	Protected effect	22	22	9	9	rs49289788	rs32335588;rs32112067;rs108035116;rs6250833;rs37505705;rs31762723;rs30763126;rs33494411;rs30766381;rs32452440;rs37131139;rs13476119;rs49289788;rs36548506;rs37895110;rs3691222;rs33589350;rs33586240;rs6406033;rs46445754;rs31534627;rs215571652;rs13476137;rs13476138;rs49147137;rs107630249
chr1_11499.1	chr1:135999719-135999969	Intron (ENSMUST00000166193.8/226438, intron 1 of 26)	dELS	Igfn1	7.57996	1	62.499	62.3459	63.8825	135170068	133975583	138606530	Significant in baseline	No effect	21	21	9	9	rs49289788	rs37131139;rs13476119;rs49289788;rs36548506;rs37895110;rs3691222;rs33589350;rs33586240;rs6406033;rs46445754;rs31534627;rs215571652
chr1_11499.2	chr1:135999969-136000219	Intron (ENSMUST00000166193.8/226438, intron 1 of 26)	dELS	Igfn1	5.92601	1	63.2404	60.9326	63.8825	136554384	130863937	138606530	Significant in baseline	No effect	21	21	10	10	rs33586240	rs32335588;rs32112067;rs108035116;rs6250833;rs37505705;rs31762723;rs30763126;rs33494411;rs30766381;rs32452440;rs37131139;rs13476119;rs49289788;rs36548506;rs37895110;rs3691222;rs33589350;rs33586240;rs6406033;rs46445754;rs31534627;rs215571652
chr1_11511.10	chr1:136032083-136032333	Promoter (<=1kb)		Tmem9	3.99778	17	9.12136	8.47931	10.0119	12162949	11565211	21686210	Significant in baseline	No effect	18	18	13	13	rs108375027	rs33393386;rs46339515;rs33183615;rs49702852;rs33169172;rs108375027;rs33518122;rs3662820;rs33637088;rs33220795;rs30924502;rs29499971;rs3654149;rs51863865;rs6181074;rs33314464;rs16783619;rs31589117;rs52562350
chr1_11521.2	chr1:136055579-136055829	Promoter (2-3kb)	dELS	Cacna1s	4.03126	1	63.2404	60.9326	64.5265	136554384	130863937	139806775	Significant in baseline	Protected effect	21	21	10	10	rs33586240	rs32335588;rs32112067;rs108035116;rs6250833;rs37505705;rs31762723;rs30763126;rs33494411;rs30766381;rs32452440;rs37131139;rs13476119;rs49289788;rs36548506;rs37895110;rs3691222;rs33589350;rs33586240;rs6406033;rs46445754;rs31534627;rs215571652;rs13476137;rs13476138;rs49147137;rs107630249
chr1_1154.1	chr1:24613013-24613224	Exon (ENSMUST00000188299.1/ENSMUST00000188299.1, exon 1 of 1)		Col19a1	5.10552	1	92.8648	91.944	93.7613	189361953	189170283	191333382	No baseline effect	No effect	26	26	5	5	rs30604277	rs32790314;rs32404005;rs30604277;rs3675669;rs30553311;rs32180871;rs32051408;rs31378221;rs32133051;rs31813445;rs6210519
chr1_11541.3	chr1:136102694-136102944	Promoter (2-3kb)		Cacna1s	4.05529	6	10.9609	10.1775	13.1516	24108037	23242013	28715963	Significant in baseline	No effect	15	15	16	16	rs30305830	rs33760701;rs30460491;rs38759439;rs30305830;rs30905182;rs6391567;rs262454643;rs30372521;rs52387753;rs29881197;rs30365213;rs36444893;rs37762447;rs30730865;rs36750821;rs6218880;rs30119953;rs29920487;rs29968506;rs33819873;rs30764547
chr1_11551.2	chr1:136122890-136123140	Distal Intergenic		Cacna1s	4.02206	1	64.2701	60.9326	66.2371	139521091	130863937	145376780	Significant in baseline	No effect	23	23	8	8	rs13476138	rs32335588;rs32112067;rs108035116;rs6250833;rs37505705;rs31762723;rs30763126;rs33494411;rs30766381;rs32452440;rs37131139;rs13476119;rs49289788;rs36548506;rs37895110;rs3691222;rs33589350;rs33586240;rs6406033;rs46445754;rs31534627;rs215571652;rs13476137;rs13476138;rs49147137;rs107630249;rs3682831;rs13476148;rs31066093;rs31063456
chr1_11554.10	chr1:136130234-136130484	Promoter (<=1kb)	dELS	Gm15850	4.82434	1	63.8825	62.8588	63.8825	138606530	135562623	138606530	Significant in baseline	Protected effect	21	21	10	10	rs215571652	rs37895110;rs3691222;rs33589350;rs33586240;rs6406033;rs46445754;rs31534627;rs215571652
chr1_11554.22	chr1:136133234-136133484	Promoter (1-2kb)		Kif21b	4.01683	11	31.1379	30.4817	31.1379	62251912	61324742	62251912	Significant in baseline	No effect	8	8	22	22	rs29477901	rs50121641;rs29477901
chr1_11554.22	chr1:136133234-136133484	Promoter (1-2kb)		Kif21b	3.71409	19	26.096	25.2422	28.5917	31828272	30802922	32357503	Significant in baseline	No effect	17	17	10	10	rs30364759	rs30559050;rs13483591;rs51318437;rs30364759;rs13459194;rs30908740
chr1_11554.40	chr1:136137734-136137984	Intron (ENSMUST00000075164.10/16565, intron 1 of 34)	dELS	Kif21b	4.83177	1	64.2701	53.6334	64.5265	139521091	106321454	139806775	Significant in baseline	Protected effect	23	23	8	8	rs13476138	rs30487561;rs30484039;rs47647099;rs49762567;rs3680216;rs31994637;rs31960226;rs32738873;rs31744083;rs47329570;rs31960159;rs13476045;rs45843892;rs31935680;rs3685919;rs6319405;rs3710646;rs30584583;rs51800183;rs48823920;rs30719160;rs31471077;rs30675648;rs32180662;rs30680977;rs32807094;rs30637341;rs32757674;rs32268077;rs30725178;rs30724278;rs30698282;rs3723088;rs3663708;rs31007558;rs30727085;rs4801580…
chr1_11557.7	chr1:136148235-136148485	Exon (ENSMUST00000075164.10/16565, exon 6 of 35)		Kif21b	4.17489	X	30.9565	29.6098	31.0838	116851852	115338127	119824977	Significant in baseline	No effect	14	14	17	17	rs29105405	rs29107425;rs29106243;rs52084848;rs29105405;rs244975874;rs31262455
chr1_11558.4	chr1:136151593-136151843	Intron (ENSMUST00000075164.10/16565, intron 9 of 34)		Kif21b	4.37806	1	62.499	57.4639	64.5265	135170068	121148291	139806775	Significant in baseline	No effect	21	21	9	9	rs49289788	rs48015801;rs230640887;rs237885247;rs48962291;rs213804272;rs31189732;rs47085630;rs49565748;rs30561273;rs30785490;rs32612920;rs31573665;rs47328362;rs32769332;rs32013884;rs50349808;rs32811017;rs31348531;rs33889750;rs47026905;rs6263067;rs32558546;rs32101230;rs49892902;rs8256197;rs13459051;rs32335588;rs32112067;rs108035116;rs6250833;rs37505705;rs31762723;rs30763126;rs33494411;rs30766381;rs32452440;rs…
chr1_11564.4	chr1:136167343-136167593	Promoter (1-2kb)		Kif21b	6.33053	1	62.499	60.0301	63.1132	135170068	128543687	136537577	Significant in baseline	Protected effect	21	21	9	9	rs49289788	rs32101230;rs49892902;rs8256197;rs13459051;rs32335588;rs32112067;rs108035116;rs6250833;rs37505705;rs31762723;rs30763126;rs33494411;rs30766381;rs32452440;rs37131139;rs13476119;rs49289788;rs36548506;rs37895110;rs3691222;rs33589350
chr1_11598.3	chr1:136259183-136259433	Promoter (1-2kb)		Gpr25	3.71564	18	22.3635	19.034	23.4014	49935874	39809358	54614841	Significant in baseline	No effect	14	14	17	17	rs29858908	rs29878134;rs29774579;rs13483314;rs50813675;rs49650054;rs3683264;rs29868350;rs29874243;rs49948966;rs243630124;rs13483328;rs31925045;rs6355722;rs29979159;rs29999629;rs29672459;rs237536737;rs3716758;rs29678518;rs30180395;rs29720204;rs29861737;rs29584951;rs29555033;rs49297670;rs30152148;rs30105124;rs29863756;rs3703039;rs6402149;rs4138356;rs29858908;rs13483354;rs30005587;rs6240957;rs3706369;rs2995737…
chr1_11655.1	chr1:136528718-136528968	3' UTR		Kif14	4.00582	1	29.54	27.9174	32.7764	47189877	46908195	58115573	Significant in baseline	No effect	13	13	18	18	rs32093536	rs31745317;rs32434528;rs32093536;rs31325347;rs32602884;rs32209957;rs32662962;rs31517020;rs31565873;rs13475872;rs32434080;rs33840699;rs51350456;rs47870456;rs29596070;rs13475876;rs32516530;rs13475879;rs29655680
chr1_11664.1	chr1:136549204-136549454	Intron (ENSMUST00000194018.1/ENSMUST00000194018.1, intron 3 of 4)		Kif14	3.85968	1	63.1132	62.3459	64.2701	136537577	133975583	139521091	Significant in baseline	No effect	22	22	9	9	rs33589350	rs37131139;rs13476119;rs49289788;rs36548506;rs37895110;rs3691222;rs33589350;rs33586240;rs6406033;rs46445754;rs31534627;rs215571652;rs13476137;rs13476138
chr1_11694.1	chr1:136682422-136682663	Promoter (<=1kb)	dELS	Gm19705	4.47023	1	63.2404	62.3459	63.8825	136554384	133975583	138606530	Significant in baseline	No effect	21	21	10	10	rs33586240	rs37131139;rs13476119;rs49289788;rs36548506;rs37895110;rs3691222;rs33589350;rs33586240;rs6406033;rs46445754;rs31534627;rs215571652
chr1_11695.5	chr1:136683962-136684212	Promoter (<=1kb)		Gm19705	3.70069	8	43.795	40.5738	55.1964	107979055	100458274	123289925	Significant in baseline	No effect	17	17	13	13	rs50465429	rs3683922;rs47064165;rs32420724;rs48756956;rs30757772;rs30771728;rs13479958;rs46061215;rs33015720;rs33004646;rs6180306;rs52431037;rs52240807;rs30960224;rs6182338;rs13479970;rs33551061;rs31013353;rs33519536;rs49094676;rs50465429;rs31021623;rs31032628;rs3715791;rs13479975;UNC080532671;rs32928525;rs225424560;rs31084940;rs3656921;rs3662808;rs31158659;rs31161793;rs32674736;rs32780597;rs51217319;rs3357…
chr1_11704.2	chr1:136711196-136711446	Intron (ENSMUST00000181274.1/100503474, intron 2 of 4)		Platr22	5.34635	1	62.3459	60.0301	63.8825	133975583	128543687	138606530	Significant in baseline	No effect	21	21	10	10	rs37131139	rs32101230;rs49892902;rs8256197;rs13459051;rs32335588;rs32112067;rs108035116;rs6250833;rs37505705;rs31762723;rs30763126;rs33494411;rs30766381;rs32452440;rs37131139;rs13476119;rs49289788;rs36548506;rs37895110;rs3691222;rs33589350;rs33586240;rs6406033;rs46445754;rs31534627;rs215571652
chr1_11727.5	chr1:136949571-136949821	Promoter (<=1kb)	dELS	Nr5a2	4.24482	7	48.8167	44.6854	52.015	95997605	84149847	106476301	Significant in baseline	No effect	18	18	13	13	rs31894020	rs31476858;rs32066094;rs6278282;rs31521374;rs37626662;rs31488447;rs32267337;rs6394492;rs32174327;rs31133462;rs31178835;rs32409257;rs32326663;rs31182975;rs31345154;rs32416091;rs31867408;rs32124327;rs31349093;rs31709999;rs32510496;rs31238492;rs31093558;rs4226783;rs31732570;rs36361468;rs32131184;rs31481725;rs51546480;rs13479416;rs31323776;rs31894020;rs31494684;rs31541427;rs31551122;rs48613317;rs3158…
chr1_11728.4	chr1:136952929-136953179	Promoter (<=1kb)	dELS; dELS,CTCF-bound	Nr5a2	4.42226	2	11.7858	9.43718	16.2178	19078724	15000000	28969780	Significant in baseline	No effect	17	17	14	14	rs13476364	Affy_PC2_15;rs13476358;rs27126014;rs29503212;rs27125983;rs27125935;rs6384589;rs13476363;rs27144318;rs33092900;rs13476364;rs27127331;rs49733425;rs27140323;rs6292983;rs27136990;rs27137272;rs13476379;rs6193345;rs29866286;rs27219279;rs52428815;rs6286688;rs33287256;rs32869517;rs33279854;rs13476386;rs27186439;rs33369549;rs27195273;rs33136036;rs13476390;rs33081937;rs27184053;rs27185513;rs13465578;rs3286…
chr1_11746.2	chr1:137298103-137298353	Distal Intergenic		Nr5a2	3.79876	1	63.2404	60.9326	64.5265	136554384	130863937	139806775	Significant in baseline	No effect	21	21	10	10	rs33586240	rs32335588;rs32112067;rs108035116;rs6250833;rs37505705;rs31762723;rs30763126;rs33494411;rs30766381;rs32452440;rs37131139;rs13476119;rs49289788;rs36548506;rs37895110;rs3691222;rs33589350;rs33586240;rs6406033;rs46445754;rs31534627;rs215571652;rs13476137;rs13476138;rs49147137;rs107630249
chr1_11748.1	chr1:137323426-137323676	Distal Intergenic	dELS	Nr5a2	4.01924	1	62.986	30.707	66.2371	136317917	51967970	145376780	Significant in baseline	No effect	21	21	9	9	rs3691222	rs31565873;rs13475872;rs32434080;rs33840699;rs51350456;rs47870456;rs29596070;rs13475876;rs32516530;rs13475879;rs29655680;rs29659120;rs29692016;rs31726356;rs31876473;rs6325108;rs31498570;rs13475883;rs13475885;rs13475887;rs49196471;rs29963534;rs32161565;rs32416624;rs3703813;rs52470670;rs3162895;rs30173232;rs30465484;rs45845149;rs31727300;rs32848413;rs30230950;rs32347478;rs33859501;rs30993227;rs5124…
chr1_11748.3	chr1:137323926-137324176	Distal Intergenic	dELS,CTCF-bound	Nr5a2	6.39404	1	63.8825	63.2404	63.8825	138606530	136554384	138606530	Significant in baseline	No effect	21	21	10	10	rs215571652	rs33586240;rs6406033;rs46445754;rs31534627;rs215571652
chr1_11765.5	chr1:137670708-137670958	Distal Intergenic		Mir181a-1	4.45002	1	63.8825	62.3459	63.8825	138606530	133975583	138606530	Significant in baseline	No effect	21	21	10	10	rs215571652	rs37131139;rs13476119;rs49289788;rs36548506;rs37895110;rs3691222;rs33589350;rs33586240;rs6406033;rs46445754;rs31534627;rs215571652
chr1_11770.1	chr1:137827359-137827609	Distal Intergenic	pELS	Mir181a-1	5.81507	1	63.3677	62.8588	63.8825	136566409	135562623	138606530	Significant in baseline	Protected effect	21	21	10	10	rs6406033	rs37895110;rs3691222;rs33589350;rs33586240;rs6406033;rs46445754;rs31534627;rs215571652
chr1_11776.1	chr1:137922595-137922845	Intron (ENSMUST00000182127.1/ENSMUST00000182127.1, intron 1 of 2)	dELS	Mir181a-1	4.1165	1	63.7553	60.9326	63.8825	138573759	130863937	138606530	Significant in baseline	No effect	21	21	10	10	rs31534627	rs32335588;rs32112067;rs108035116;rs6250833;rs37505705;rs31762723;rs30763126;rs33494411;rs30766381;rs32452440;rs37131139;rs13476119;rs49289788;rs36548506;rs37895110;rs3691222;rs33589350;rs33586240;rs6406033;rs46445754;rs31534627;rs215571652
chr1_11787.1	chr1:138044244-138044494	Distal Intergenic		Ptprc	3.71243	8	43.795	43.2998	49.89	107979055	107509859	116276566	Significant in baseline	No effect	17	17	13	13	rs50465429	rs33551061;rs31013353;rs33519536;rs49094676;rs50465429;rs31021623;rs31032628;rs3715791;rs13479975;UNC080532671;rs32928525;rs225424560;rs31084940;rs3656921;rs3662808;rs31158659;rs31161793;rs32674736;rs32780597;rs51217319;rs33570756;rs13479984;rs33110413;rs13479987;rs13479993;rs37325528;rs49552855;rs37229383;rs13479996;rs46907062;rs33124580;rs51327407;rs51267308;rs3700124;rs47704538;rs31366297;rs31…
chr1_11812.2	chr1:138550492-138550742	Intron (ENSMUST00000186017.6/59125, intron 2 of 9)		Nek7	3.93188	16	9.80869	8.31535	11.2629	22028847	21323642	23683879	Significant in baseline	No effect	14	14	17	17	rs4165287	rs4165279;rs4165280;rs4165287;rs4165290;rs4165334;rs4165343
chr1_11815.2	chr1:138596226-138596476	Intron (ENSMUST00000187407.6/59125, intron 1 of 9)	dELS	Nek7	3.70571	1	63.2404	60.0301	63.8825	136554384	128543687	138606530	Significant in baseline	Protected effect	21	21	10	10	rs33586240	rs32101230;rs49892902;rs8256197;rs13459051;rs32335588;rs32112067;rs108035116;rs6250833;rs37505705;rs31762723;rs30763126;rs33494411;rs30766381;rs32452440;rs37131139;rs13476119;rs49289788;rs36548506;rs37895110;rs3691222;rs33589350;rs33586240;rs6406033;rs46445754;rs31534627;rs215571652
chr1_11833.2	chr1:138841604-138841854	Promoter (<=1kb)	dELS; pELS	Lhx9	3.89167	9	30.6448	13.0599	34.2407	66989778	33440607	73520597	Significant in baseline	No effect	18	18	13	13	rs29934031	rs50870023;rs29642165;rs32495822;rs33632997;rs30458971;rs3659084;rs38752084;rs219522925;rs29597174;rs29841037;rs4227588;rs30437276;rs29632691;rs29743771;rs29878586;rs30136672;rs51585998;rs264361605;rs51361016;rs52408413;rs13480151;rs30132525;rs37429415;rs29646104;rs36424704;rs33737439;rs47317817;rs37272315;rs48351834;rs47739724;rs48968649;rs46383063;rs30028211;rs3691383;rs37428431;rs50557392;rs30…
chr1_11841.1	chr1:138922685-138922935	Distal Intergenic	dELS	Dennd1b	6.54174	1	63.2404	62.6023	63.8825	136554384	135170068	138606530	Significant in baseline	No effect	21	21	10	10	rs33586240	rs49289788;rs36548506;rs37895110;rs3691222;rs33589350;rs33586240;rs6406033;rs46445754;rs31534627;rs215571652
chr1_11844.1	chr1:138937938-138938188	Distal Intergenic		Dennd1b	7.8926	1	63.1132	62.3459	63.7553	136537577	133975583	138573759	Significant in baseline	No effect	22	22	9	9	rs33589350	rs37131139;rs13476119;rs49289788;rs36548506;rs37895110;rs3691222;rs33589350;rs33586240;rs6406033;rs46445754;rs31534627
chr1_11845.1	chr1:138939288-138939538	Distal Intergenic		Dennd1b	8.92109	1	63.2404	62.6023	63.8825	136554384	135170068	138606530	Significant in baseline	No effect	21	21	10	10	rs33586240	rs49289788;rs36548506;rs37895110;rs3691222;rs33589350;rs33586240;rs6406033;rs46445754;rs31534627;rs215571652
chr1_11845.1	chr1:138939288-138939538	Distal Intergenic		Dennd1b	4.43671	2	82.5023	79.6487	85.0634	164926802	161895805	166584107	Significant in baseline	No effect	17	17	14	14	rs28262110	rs27350606;rs27350596;rs27317603;rs27303047;rs27316684;rs27300581;rs28245692;rs3671849;rs33318324;rs49887173;rs27331142;rs6345991;rs13476889;rs49712246;rs8275857;rs29671327;rs13476891;rs28262110;rs46248753;rs28262081;rs6185704;rs28240225;rs6177049;rs251909769;rs27330219;rs27298855;rs27298670
chr1_11845.2	chr1:138939538-138939788	Distal Intergenic		Dennd1b	8.63663	1	63.2404	62.6023	63.8825	136554384	135170068	138606530	Significant in baseline	No effect	21	21	10	10	rs33586240	rs49289788;rs36548506;rs37895110;rs3691222;rs33589350;rs33586240;rs6406033;rs46445754;rs31534627;rs215571652
chr1_11845.2	chr1:138939538-138939788	Distal Intergenic		Dennd1b	4.70606	2	80.9308	79.6487	85.0634	163773619	161895805	166584107	Significant in baseline	No effect	17	17	14	14	rs49887173	rs27350606;rs27350596;rs27317603;rs27303047;rs27316684;rs27300581;rs28245692;rs3671849;rs33318324;rs49887173;rs27331142;rs6345991;rs13476889;rs49712246;rs8275857;rs29671327;rs13476891;rs28262110;rs46248753;rs28262081;rs6185704;rs28240225;rs6177049;rs251909769;rs27330219;rs27298855;rs27298670
chr1_11845.3	chr1:138939788-138940038	Distal Intergenic		Dennd1b	9.50162	1	63.2404	62.6023	63.8825	136554384	135170068	138606530	Significant in baseline	No effect	21	21	10	10	rs33586240	rs49289788;rs36548506;rs37895110;rs3691222;rs33589350;rs33586240;rs6406033;rs46445754;rs31534627;rs215571652
chr1_11845.3	chr1:138939788-138940038	Distal Intergenic		Dennd1b	4.91463	2	82.5023	80.2908	85.0634	164926802	162692979	166584107	Significant in baseline	No effect	17	17	14	14	rs28262110	rs27300581;rs28245692;rs3671849;rs33318324;rs49887173;rs27331142;rs6345991;rs13476889;rs49712246;rs8275857;rs29671327;rs13476891;rs28262110;rs46248753;rs28262081;rs6185704;rs28240225;rs6177049;rs251909769;rs27330219;rs27298855;rs27298670
chr1_12.1	chr1:3433783-3434033	Intron (ENSMUST00000070533.4/497097, intron 1 of 2)		Xkr4	3.95069	1	1.75345	1.499	17.084	3777023	3010274	32343834	Significant in baseline	No effect	17	17	13	13	rs32430919	rs31443144;rs6269442;rs32285189;rs258367496;rs32430919;rs36251697;rs30658298;rs51852623;rs31879829;rs36742481;rs6365999;rs13470446;Affy_10344635;rs6376963;rs30847416;rs32759286;rs31625087;rs31716357;rs3677817;rs47937185;rs32140280;rs32096391;rs47493511;rs31190522;rs6298633;rs31362910;rs31878990;rs32186775;rs31868650;rs6360236;rs32740138;rs249962268_D1Mit1;rs30991578;rs32347261;rs36585555;rs304772…
chr1_12.2	chr1:3434033-3434283	Intron (ENSMUST00000070533.4/497097, intron 1 of 2)		Xkr4	4.3059	1	1.499	1.499	2.90441	3010274	3010274	5018010	Significant in baseline	No effect	18	18	13	13	rs31443144	rs31443144;rs6269442;rs32285189;rs258367496;rs32430919;rs36251697;rs30658298;rs51852623;rs31879829;rs36742481;rs6365999;rs13470446;Affy_10344635;rs6376963
chr1_12057.1	chr1:146724899-146725104	Intron (ENSMUST00000074622.10/215378, intron 4 of 7)	DNase-H3K4me3	Brinp3	6.73533	1	66.6207	66.2371	67.6483	146745009	145376780	149797787	Significant in baseline	No effect	23	23	8	8	rs31006935	rs31063456;rs31055515;rs32687429;rs32586240;rs31006935;rs31190083;rs13476163;rs30991744;rs30769516;rs3711440;rs6411476;rs3680050
chr1_12070.1	chr1:148634443-148634693	Distal Intergenic		Pla2g4a	4.09891	5	2.24068	1.859	2.88273	5365277	3143128	6499930	Significant in baseline	Protected effect	14	14	17	17	rs31019259	rs31232890;rs29503906;rs31184306;rs29628794;rs3664617;rs30663086;rs31019259;rs33685759;rs50122585;rs29678115;rs3142610
chr1_12106.3	chr1:149882882-149883132	Intron (ENSMUST00000070200.14/18783, intron 7 of 17)		Pla2g4a	4.79299	1	67.7756	67.1335	67.9028	150059940	147054880	151271465	Significant in baseline	No effect	24	24	7	7	rs13476175	rs30769516;rs3711440;rs6411476;rs3680050;rs31640585;rs13476175;rs13476177;rs31897662
chr1_12135.1	chr1:150489205-150489455	Distal Intergenic		Prg4	3.77742	1	67.9028	53.6334	68.1592	151271465	106321454	151921167	Significant in baseline	Protected effect	23	23	8	8	rs31897662	rs30487561;rs30484039;rs47647099;rs49762567;rs3680216;rs31994637;rs31960226;rs32738873;rs31744083;rs47329570;rs31960159;rs13476045;rs45843892;rs31935680;rs3685919;rs6319405;rs3710646;rs30584583;rs51800183;rs48823920;rs30719160;rs31471077;rs30675648;rs32180662;rs30680977;rs32807094;rs30637341;rs32757674;rs32268077;rs30725178;rs30724278;rs30698282;rs3723088;rs3663708;rs31007558;rs30727085;rs4801580…
chr1_12137.2	chr1:150504494-150504744	Distal Intergenic		Prg4	4.8632	1	67.7756	67.1335	67.9028	150059940	147054880	151271465	Significant in baseline	Protected effect	24	24	7	7	rs13476175	rs30769516;rs3711440;rs6411476;rs3680050;rs31640585;rs13476175;rs13476177;rs31897662
chr1_12137.3	chr1:150504744-150504994	Distal Intergenic		Prg4	4.10946	1	67.6483	66.6207	67.9028	149797787	146745009	151271465	Significant in baseline	No effect	24	24	7	7	rs3680050	rs31006935;rs31190083;rs13476163;rs30991744;rs30769516;rs3711440;rs6411476;rs3680050;rs31640585;rs13476175;rs13476177;rs31897662
chr1_12178.1	chr1:151258055-151258305	Distal Intergenic		Ivns1abp	3.58218	15	13.9413	13.4264	18.4783	22860400	18963777	32042169	Significant in baseline	No effect	17	17	13	13	rs37629956	rs107916216;rs50107552;rs3680788;rs32868341;rs37629956;rs39129885;rs13482486;rs31910399;rs31915734;rs36551679;rs31825135;rs52344096;rs13482490;rs32936141;rs32931844;rs32152729;rs13482497;rs253158222;rs48427909;rs37136498;rs13482498;rs108718789;rs3702361;rs31705252;rs241073119;rs6352269;UNC150507742;rs32197799;rs32478382;rs32406896;rs13482508;rs13482509
chr1_12214.1	chr1:151572670-151572920	Promoter (1-2kb)	dELS,CTCF-bound	Niban1	3.91918	7	39.1612	37.3458	41.2125	73304970	70848220	74969396	Significant in baseline	Up effect	18	18	13	13	rs31597771	rs31037523;rs37007295;rs47119834;rs31882027;rs13479326;rs31453122;rs32299443;rs31064232;rs46054811;rs31783952;rs227095692;rs31342575;rs31623161;rs31597771;rs31246895;rs13479334;UNC070318260;rs3691951;rs31985217;rs49704812;rs32052013;rs31223769;rs16793804;rs8268441;rs36604679;rs49388131;rs31807959;rs32310436;rs48673245;rs13479342
chr1_12227.2	chr1:151705526-151705776	Intron (ENSMUST00000148810.7/63913, intron 10 of 13)		Niban1	3.7561	14	48.8306	47.9341	50.4015	117841014	116006786	118537399	Significant in baseline	No effect	15	15	15	15	rs3711767	rs3722416;rs30192076;rs3671398;rs30893914;rs6286809;rs3711767;rs30438807;rs30259301;rs49879578
chr1_12242.1	chr1:151818751-151819001	3' UTR		Edem3	4.06722	2	23.4391	4.20217	79.2651	45622327	7696420	161690930	Significant in baseline	No effect	10	10	21	21	rs27918174	rs13476335;Affy_4430433etal;rs33562363;rs13476350;rs13476352;rs29825025;rs13476355;Affy_PC2_15;rs13476358;rs27126014;rs29503212;rs27125983;rs27125935;rs6384589;rs13476363;rs27144318;rs33092900;rs13476364;rs27127331;rs49733425;rs27140323;rs6292983;rs27136990;rs27137272;rs13476379;rs6193345;rs29866286;rs27219279;rs52428815;rs6286688;rs33287256;rs32869517;rs33279854;rs13476386;rs27186439;rs33369549;…
chr1_1229.1	chr1:25185835-25186085	Intron (ENSMUST00000153568.7/210933, intron 3 of 9)		Adgrb3	4.1674	1	11.499	8.02296	12.7944	23152100	18168753	25298573	Significant in baseline	Protected effect	10	10	19	19	rs32400861	rs32043384;rs219716413;rs13475747;rs51820747;rs51700370;rs52118613;rs31772262;rs3670611;rs224386739;rs36660068;rs6404446;rs32101154;rs6253968;rs32315565;rs31766107;rs46856073;rs46249537;rs31949292;rs30499557;rs6316488;rs32400861;rs32597415;rs228543676;rs239824187;rs13475765;rs4222215;rs13475766;rs31567874;rs32245765
chr1_1229.2	chr1:25186085-25186335	Intron (ENSMUST00000153568.7/210933, intron 3 of 9)		Adgrb3	4.15927	1	12.499	9.42637	16.0088	25237332	21640961	32082234	Significant in baseline	No effect	8	8	20	20	rs31567874	rs32315565;rs31766107;rs46856073;rs46249537;rs31949292;rs30499557;rs6316488;rs32400861;rs32597415;rs228543676;rs239824187;rs13475765;rs4222215;rs13475766;rs31567874;rs32245765;rs32487442;rs13475771;rs13475772;rs32249228;rs32331653;rs32086436;rs48222526;rs223334166;rs31670161;rs31134323;rs47868189;rs31600419;rs30514876;rs32110348;rs31590459;rs32372810;rs32684509;rs230225148;rs48664698;rs32760971
chr1_12292.1	chr1:152008484-152008734	Intron (ENSMUST00000187603.6/69399, intron 1 of 6)		1700025G04Rik	3.86941	14	52.3441	50.4015	52.855	119984934	118537399	124108797	Significant in baseline	No effect	14	14	16	16	rs30792453	rs49879578;rs30553510;rs13482393;rs30152734;rs31445132;UNC140408279;rs31102190;rs13482395;rs13482396;rs48845797;rs30801242;rs30852708;rs30792453;rs47251162;rs3691815;rs49957564;rs51911760;rs6384035;rs46397554;rs31233932
chr1_12313.3	chr1:152088481-152088731	Promoter (1-2kb)		1700025G04Rik	3.52116	11	10.2344	6.48033	14.4553	19041075	11682446	27337521	No baseline effect	No effect	13	13	18	18	rs29387532	rs45864877;rs29420294;rs29385259;rs3659698;rs26847682;rs49943470;rs26834213;rs29390185;rs13480879;rs253718601;rs3673722;rs51041110;rs26861736;rs29457913;rs26851009;rs29385990;rs51923946;rs29450584;rs29449382;rs26851265;rs29389965;rs218648778;rs29464036;rs26859350;rs52161029;rs51345123;rs26831366;rs29387532;rs13480899;rs26840913;rs51279354;rs3723987;rs26829217;D11Mit79;rs26831217;rs13480901;rs2943…
chr1_12386.1	chr1:152579309-152579559	Intron (ENSMUST00000111859.7/19731, intron 4 of 18)	dELS	Rgl1	3.88055	X	21.2084	17.0648	27.5419	70609697	57534512	102126656	Significant in baseline	No effect	12	12	19	19	rs29043238	rs13483765;rs29058309;rs47978544;rs212766299;rs29058288;rs13483768;rs29060832;rs13483769;rs29057816;rs29057773;rs29059808;rs29057552;rs13483770;rs48259763;rs31360508;rs232735621;rs29052163;rs29046879;rs33876026;rs31296287;rs13483813;rs29043238;rs29044678;rs29043152;rs31404716;rs3161011;rs3157124;rs33843040;rs13483818;rs238139072;DXMit1;rs31270235;rs13483824;rs29033236;rs29030852;rs29031335;rs3137…
chr1_12390.2	chr1:152594137-152594387	Promoter (1-2kb)	dELS	Rgl1	3.75467	14	49.8807	46.5087	50.5287	118462433	111983602	118726353	Significant in baseline	Protected effect	15	15	15	15	rs30259301	rs31011682;rs13482380;rs30386025;JAX00057651;rs259924538;rs51650625;rs3722416;rs30192076;rs3671398;rs30893914;rs6286809;rs3711767;rs30438807;rs30259301;rs49879578;rs30553510
chr1_12390.3	chr1:152594387-152594637	Promoter (1-2kb)	dELS	Rgl1	4.2801	1	71.0952	68.1592	71.6061	158380674	151921167	160285089	Significant in baseline	No effect	20	20	11	11	rs33740307	rs31226073;rs31206241;rs31201062;rs6267646;rs31180473;rs32707440;rs31173184;rs13476184;rs231234050;rs47680477;rs37068894;rs32571301;rs262053553;rs13476187;rs32380880;rs220024233;rs32238353;rs30592448;rs6181202;rs235136764;rs31598960;rs33692139;rs31404871;rs30497461;rs32737955;rs48733621;rs31266917;rs30694289;rs3696645;rs30471675;rs3722993;rs49525822;rs6209248;rs33742737;rs33740307;rs33739489;rs31…
chr1_12416.2	chr1:152660032-152660282	Intron (ENSMUST00000111857.2/19731, intron 2 of 17)	dELS	Rgl1	3.87357	17	9.97	8.73377	10.2684	21686210	12085862	21690414	Significant in baseline	No effect	18	18	12	12	rs52562350	rs49702852;rs33169172;rs108375027;rs33518122;rs3662820;rs33637088;rs33220795;rs30924502;rs29499971;rs3654149;rs51863865;rs6181074;rs33314464;rs16783619;rs31589117;rs52562350;rs31862018;rs31423591
chr1_12436.1	chr1:152763155-152763405	Promoter (2-3kb)	DNase-H3K4me3	Rgl1	8.43135	1	69.3102	68.2864	69.5646	154143508	152434510	154540240	Significant in baseline	No effect	24	24	7	7	rs262053553	rs31201062;rs6267646;rs31180473;rs32707440;rs31173184;rs13476184;rs231234050;rs47680477;rs37068894;rs32571301;rs262053553;rs13476187;rs32380880;rs220024233;rs32238353
chr1_12436.2	chr1:152763405-152763655	Promoter (2-3kb)	DNase-H3K4me3	Rgl1	3.95614	1	68.1592	67.1335	80.452	151921167	147054880	172706936	Significant in baseline	No effect	25	25	6	6	rs31226073	rs30769516;rs3711440;rs6411476;rs3680050;rs31640585;rs13476175;rs13476177;rs31897662;rs31230953;rs31226073;rs31206241;rs31201062;rs6267646;rs31180473;rs32707440;rs31173184;rs13476184;rs231234050;rs47680477;rs37068894;rs32571301;rs262053553;rs13476187;rs32380880;rs220024233;rs32238353;rs30592448;rs6181202;rs235136764;rs31598960;rs33692139;rs31404871;rs30497461;rs32737955;rs48733621;rs31266917;rs30…
chr1_12467.14	chr1:152833064-152833314	Intron (ENSMUST00000186568.6/17970, intron 11 of 15)		Smg7	3.97114	19	15.3917	14.7536	15.6462	20897770	19868858	21398774	Significant in baseline	No effect	17	17	14	14	rs31289940	rs51110867;rs3694495;rs48044555;rs49900587;rs3023480;rs30858374;rs3668911;rs31289940;rs30999093;rs13483561;rs39106501
chr1_12514.3	chr1:153049986-153050236	Intron (ENSMUST00000186368.6/226518, intron 1 of 11)		Nmnat2	4.59657	8	49.795	49.2479	55.1964	116276566	114800238	123289925	Significant in baseline	No effect	14	14	15	15	rs33132295	rs31411257;rs31417341;rs31419266;rs6227298;rs33032461;rs33253920;rs33132295;rs33097889;rs6347490;gnf08.118.027;rs13480011;gnf08.119.598;rs6296597;Affy_PC8_121;rs32862148
chr1_12516.1	chr1:153052251-153052501	Intron (ENSMUST00000186368.6/226518, intron 1 of 11)		Nmnat2	4.1107	19	48.3364	47.0543	51.658	53944471	52562306	57214024	Significant in baseline	No effect	22	22	9	9	rs47782010	rs30414771;rs36776978;rs30899519;rs31132254;rs8275575;rs30619556;rs30352878;rs31013688;rs255053457;rs30963501;rs37555706;rs47782010;rs49416918;rs37133893;rs13483679;rs31086507;rs31161957;rs30663834;rs30511575;rs13483680;rs30419327;rs31016287;rs30771808;rs3654713;rs6192198;rs30699427;rs30611885;rs37882353;rs13483683;rs51466107;rs31045530;rs30370218;rs223675540;rs30372122;rs33851309;rs51242251;rs30…
chr1_12535.4	chr1:153092313-153092563	Promoter (<=1kb)	dELS,CTCF-bound	Nmnat2	3.84176	11	53.4151	50.8232	55.2921	96683859	93000000	99648838	Significant in baseline	No effect	10	10	20	20	rs27052851	AffY_PC11_93;rs230648083;rs47752027;rs13481170;rs27105221;rs235845435;rs27052851;rs47508103;rs27086489;rs29435192;rs29445436;rs27026080;rs27026004;D11Mit99
chr1_12581.1	chr1:153269054-153269304	Intron (ENSMUST00000027752.14/226519, intron 1 of 27)		Lamc1	3.84532	1	69.9483	68.1592	75.5962	155096387	151921167	170535283	Significant in baseline	No effect	22	22	9	9	rs31598960	rs31226073;rs31206241;rs31201062;rs6267646;rs31180473;rs32707440;rs31173184;rs13476184;rs231234050;rs47680477;rs37068894;rs32571301;rs262053553;rs13476187;rs32380880;rs220024233;rs32238353;rs30592448;rs6181202;rs235136764;rs31598960;rs33692139;rs31404871;rs30497461;rs32737955;rs48733621;rs31266917;rs30694289;rs3696645;rs30471675;rs3722993;rs49525822;rs6209248;rs33742737;rs33740307;rs33739489;rs31…
chr1_12589.5	chr1:153308619-153308869	Intron (ENSMUST00000027752.14/226519, intron 1 of 27)	dELS	Lamc1	4.40137	1	52.23	43.4347	93.7613	98793301	78932505	191333382	Significant in baseline	Protected effect	20	20	11	11	rs31666743	rs46070989;rs47823509;rs30156746;rs232937166;rs31612855;rs236370277;rs30205785;rs13475954;rs32668634;rs13475957;rs32358097;rs3678377;rs30804641;rs31929413;rs219816352;rs50310397;rs32104666;rs51130709;rs13475967;rs48766014;rs6234856;rs46281379;rs47858597;rs30307999;rs13475970;rs30341693;rs30337529;rs30330393;rs50175543;rs45885174;rs52508722;rs13475979;rs13475980;rs33082518;rs32252974;rs33069894;rs…
chr1_12591.1	chr1:153320156-153320406	Intron (ENSMUST00000027752.14/226519, intron 1 of 27)		Lamc1	3.96906	1	69.5646	68.2864	70.0755	154540240	152434510	155104914	Significant in baseline	No effect	23	23	7	7	rs32238353	rs31201062;rs6267646;rs31180473;rs32707440;rs31173184;rs13476184;rs231234050;rs47680477;rs37068894;rs32571301;rs262053553;rs13476187;rs32380880;rs220024233;rs32238353;rs30592448;rs6181202;rs235136764;rs31598960;rs33692139
chr1_12595.1	chr1:153386574-153386824	Distal Intergenic	dELS; dELS,CTCF-bound	E330020D12Rik	7.4929	1	68.499	68.2864	69.5646	152914150	152434510	154540240	Significant in baseline	No effect	24	24	7	7	rs32707440	rs31201062;rs6267646;rs31180473;rs32707440;rs31173184;rs13476184;rs231234050;rs47680477;rs37068894;rs32571301;rs262053553;rs13476187;rs32380880;rs220024233;rs32238353
chr1_12597.1	chr1:153401796-153402046	Distal Intergenic	CTCF-only,CTCF-bound	E330020D12Rik	5.82974	1	68.499	68.2864	69.5646	152914150	152434510	154540240	Significant in baseline	No effect	24	24	7	7	rs32707440	rs31201062;rs6267646;rs31180473;rs32707440;rs31173184;rs13476184;rs231234050;rs47680477;rs37068894;rs32571301;rs262053553;rs13476187;rs32380880;rs220024233;rs32238353
chr1_12598.1	chr1:153404312-153404562	Distal Intergenic		E330020D12Rik	5.88145	1	69.4374	68.1592	69.5646	154532837	151921167	154540240	Significant in baseline	No effect	23	23	7	7	rs220024233	rs31226073;rs31206241;rs31201062;rs6267646;rs31180473;rs32707440;rs31173184;rs13476184;rs231234050;rs47680477;rs37068894;rs32571301;rs262053553;rs13476187;rs32380880;rs220024233;rs32238353
chr1_12600.1	chr1:153414055-153414305	Promoter (<=1kb)	dELS	E330020D12Rik	8.5361	1	69.3102	68.2864	69.5646	154143508	152434510	154540240	Significant in baseline	No effect	24	24	7	7	rs262053553	rs31201062;rs6267646;rs31180473;rs32707440;rs31173184;rs13476184;rs231234050;rs47680477;rs37068894;rs32571301;rs262053553;rs13476187;rs32380880;rs220024233;rs32238353
chr1_12600.2	chr1:153414305-153414555	Promoter (<=1kb)	dELS	E330020D12Rik	8.65689	1	69.3102	68.2864	69.5646	154143508	152434510	154540240	Significant in baseline	No effect	24	24	7	7	rs262053553	rs31201062;rs6267646;rs31180473;rs32707440;rs31173184;rs13476184;rs231234050;rs47680477;rs37068894;rs32571301;rs262053553;rs13476187;rs32380880;rs220024233;rs32238353
chr1_12603.1	chr1:153422366-153422616	Promoter (2-3kb)		Shcbp1l	7.77632	1	68.1592	68.1592	69.5646	151921167	151921167	154540240	Significant in baseline	No effect	25	25	6	6	rs31226073	rs31226073;rs31206241;rs31201062;rs6267646;rs31180473;rs32707440;rs31173184;rs13476184;rs231234050;rs47680477;rs37068894;rs32571301;rs262053553;rs13476187;rs32380880;rs220024233;rs32238353
chr1_12606.2	chr1:153428466-153428716	Exon (ENSMUST00000042373.11/71836, exon 2 of 10)		Shcbp1l	5.57765	1	69.499	68.2864	69.821	154532837	152434510	154609113	Significant in baseline	No effect	23	23	7	7	rs220024233	rs31201062;rs6267646;rs31180473;rs32707440;rs31173184;rs13476184;rs231234050;rs47680477;rs37068894;rs32571301;rs262053553;rs13476187;rs32380880;rs220024233;rs32238353;rs30592448;rs6181202
chr1_12611.2	chr1:153440720-153440970	Intron (ENSMUST00000042373.11/71836, intron 6 of 9)		Shcbp1l	5.14166	1	66.6207	65.3037	68.9285	146745009	145201671	153184875	Significant in baseline	No effect	23	23	8	8	rs31006935	rs31066093;rs31063456;rs31055515;rs32687429;rs32586240;rs31006935;rs31190083;rs13476163;rs30991744;rs30769516;rs3711440;rs6411476;rs3680050;rs31640585;rs13476175;rs13476177;rs31897662;rs31230953;rs31226073;rs31206241;rs31201062;rs6267646;rs31180473;rs32707440;rs31173184;rs13476184
chr1_12617.3	chr1:153486787-153487037	Promoter (<=1kb)	dELS	Dhx9	4.3469	X	30.8293	29.6098	31.7278	115523745	115338127	130287381	Significant in baseline	Protected effect	14	14	17	17	rs29106243	rs29107425;rs29106243;rs52084848;rs29105405;rs244975874;rs31262455;rs29107796;rs29253113;rs29114872
chr1_12617.4	chr1:153487037-153487287	Promoter (<=1kb)	dELS	Dhx9	4.83093	10	39.48	36.9017	40.1181	86451681	80452285	87146879	Significant in baseline	No effect	25	25	6	6	rs29370531	rs29349055;rs13459122;UNC100214691;rs51783210;rs29365220;rs46153128;rs13480671;rs29346697;rs48953739;rs47006753;rs29383034;rs29328298;rs29370510;rs29348244;rs49058118;rs13480685;rs29328896;rs29370531;rs46184932;rs30199004;UNC18365276;rs30214827;rs30240632;rs29341107
chr1_12626.2	chr1:153548143-153548393	Promoter (1-2kb)	dELS	Npl	4.0587	1	67.9028	65.3037	69.4374	151271465	145201671	154532837	Significant in baseline	No effect	23	23	8	8	rs31897662	rs31066093;rs31063456;rs31055515;rs32687429;rs32586240;rs31006935;rs31190083;rs13476163;rs30991744;rs30769516;rs3711440;rs6411476;rs3680050;rs31640585;rs13476175;rs13476177;rs31897662;rs31230953;rs31226073;rs31206241;rs31201062;rs6267646;rs31180473;rs32707440;rs31173184;rs13476184;rs231234050;rs47680477;rs37068894;rs32571301;rs262053553;rs13476187;rs32380880;rs220024233
chr1_12629.1	chr1:153556978-153557228	Distal Intergenic	CTCF-only,CTCF-bound	Npl	3.9901	3	15.6998	14.6682	16.7314	39650830	38889885	41211676	Significant in baseline	Protected effect	20	20	11	11	rs31183617	rs6274061;rs46594852;rs31313193;rs46436000;rs48319012;rs31183617;rs50354672;rs6324747;rs6248503;rs30504535;rs51693383
chr1_12634.1	chr1:153621350-153621600	Distal Intergenic		Rgs8	4.7659	1	69.3102	68.2864	69.821	154143508	152434510	154609113	Significant in baseline	No effect	24	24	7	7	rs262053553	rs31201062;rs6267646;rs31180473;rs32707440;rs31173184;rs13476184;rs231234050;rs47680477;rs37068894;rs32571301;rs262053553;rs13476187;rs32380880;rs220024233;rs32238353;rs30592448;rs6181202
chr1_12656.7	chr1:153697466-153697716	3' UTR	dELS,CTCF-bound	Rgs8	4.01561	17	9.24859	8.73377	10.3956	12315222	12085862	22879168	Significant in baseline	No effect	18	18	13	13	rs3662820	rs49702852;rs33169172;rs108375027;rs33518122;rs3662820;rs33637088;rs33220795;rs30924502;rs29499971;rs3654149;rs51863865;rs6181074;rs33314464;rs16783619;rs31589117;rs52562350;rs31862018;rs31423591;rs32518416;rs32170136
chr1_12668.2	chr1:153735719-153735969	Promoter (1-2kb)		C230024C17Rik	3.46904	2	28.2421	27.0396	86.3495	57315196	55092420	168424389	Significant in baseline	No effect	14	14	16	16	rs6247544	rs27908481;rs6201706;rs6247544;rs29714894;rs3663027;rs27923118;rs48912331;rs48958172;rs13476520;rs3672719;rs27924920;rs13476526;rs13476531;rs29863279;rs28038082;rs32870391;rs28054403;rs33251754;rs52111367;rs28002412;rs6318340;rs28041963;rs28006671;rs28039503;rs3709716;rs28024010;rs45907259;rs28051456;rs33573911;rs28058008;rs13476540;rs33036606;UNC020085719;rs28006137;rs6314726;rs262554786;rs28014…
chr1_12678.1	chr1:153746781-153747031	Promoter (2-3kb)	DNase-H3K4me3,CTCF-bound	Rnasel	4.43517	19	46.0105	37.0604	46.3981	52073823	41929279	52202031	Significant in baseline	No effect	17	17	14	14	rs30609819	rs242670800;rs31234102;rs30407715;rs13483631;rs30311420;rs30550511;rs30621396;rs30320658;rs36772447;rs36652652;Affy_10467905;rs38080613;rs13483639;rs30667909;rs31274488;rs36521863;rs13483641;rs36931353;rs47499225;rs30320629;rs13483647;rs30886715;rs6376540;rs50610897;rs30567369;rs30556607;rs46999879;rs31157694;rs30419326;rs31282282;rs255692658;rs52477242;rs36491952;rs30902297;rs3691227;rs3660360;r…
chr1_12679.1	chr1:153749048-153749298	Promoter (<=1kb)	pELS,CTCF-bound	Rnasel	4.583	1	68.4137	68.2864	69.821	152914150	152434510	154609113	Significant in baseline	No effect	24	24	7	7	rs32707440	rs31201062;rs6267646;rs31180473;rs32707440;rs31173184;rs13476184;rs231234050;rs47680477;rs37068894;rs32571301;rs262053553;rs13476187;rs32380880;rs220024233;rs32238353;rs30592448;rs6181202
chr1_12679.4	chr1:153749798-153750048	Promoter (<=1kb)		Rnasel	3.728	7	54.0783	53.0427	55.4251	111678984	107372020	111707135	Significant in baseline	No effect	19	19	12	12	UNC070684636	rs32240406;rs32493079;rs3686975;rs13479460;UNC070684636;rs32385258;rs31901164;rs32235493
chr1_12680.3	chr1:153751994-153752244	Promoter (<=1kb)	pELS	Rnasel	4.185	14	50.024	48.7034	52.5986	118462433	117688529	121135104	Significant in baseline	No effect	14	14	14	14	rs30259301	rs6286809;rs3711767;rs30438807;rs30259301;rs49879578;rs30553510;rs13482393;rs30152734;rs31445132;UNC140408279;rs31102190;rs13482395;rs13482396;rs48845797;rs30801242;rs30852708;rs30792453;rs47251162;rs3691815;rs49957564;rs51911760;rs6384035;rs46397554
chr1_12689.1	chr1:153874011-153874261	Promoter (<=1kb)		Teddm1b	3.76407	1	68.4137	68.1592	70.968	152914150	151921167	158373251	Significant in baseline	No effect	24	24	7	7	rs32707440	rs31226073;rs31206241;rs31201062;rs6267646;rs31180473;rs32707440;rs31173184;rs13476184;rs231234050;rs47680477;rs37068894;rs32571301;rs262053553;rs13476187;rs32380880;rs220024233;rs32238353;rs30592448;rs6181202;rs235136764;rs31598960;rs33692139;rs31404871;rs30497461;rs32737955;rs48733621;rs31266917;rs30694289;rs3696645;rs30471675;rs3722993;rs49525822;rs6209248;rs33742737
chr1_12698.3	chr1:153904073-153904323	Promoter (<=1kb)	dELS	Glul	3.95389	1	68.2864	68.1592	71.0952	152434510	151921167	158380674	Significant in baseline	No effect	24	24	7	7	rs31201062	rs31226073;rs31206241;rs31201062;rs6267646;rs31180473;rs32707440;rs31173184;rs13476184;rs231234050;rs47680477;rs37068894;rs32571301;rs262053553;rs13476187;rs32380880;rs220024233;rs32238353;rs30592448;rs6181202;rs235136764;rs31598960;rs33692139;rs31404871;rs30497461;rs32737955;rs48733621;rs31266917;rs30694289;rs3696645;rs30471675;rs3722993;rs49525822;rs6209248;rs33742737;rs33740307
chr1_127.1	chr1:7171006-7171207	3' UTR		Pcmtd1	3.90542	10	22.8202	22.8202	25.284	55101486	55101486	55515150	Significant in baseline	No effect	19	19	12	12	rs29313453	rs29313453;rs48805957
chr1_127.1	chr1:7171006-7171207	3' UTR		Pcmtd1	4.67022	2	69.546	62.1923	70.1305	147564643	131557458	148751217	Significant in baseline	No effect	12	12	18	18	rs51443842	rs27244868;rs51331125;rs4223510;rs48248491;rs13476784;rs27231678;rs27285185;rs33742727;rs27268196;rs27268155;rs51176438;rs27252871;rs29523263;rs29716787;rs218995235;rs27237140;rs33733849;rs13476793;rs27257116;Affy_PC2_137;Affy_PC2_138;rs13476805;rs27204240;rs33378223;rs27187790;rs46462024;rs27218368;rs29503489;rs27236316;rs6331493;rs49319499;rs16804133;rs27248595;rs27248575;rs27280330;rs3022909;r…
chr1_12700.1	chr1:153908829-153909079	Promoter (2-3kb)		Glul	6.05784	14	16.8915	16.2434	17.4063	45238727	41193498	46510096	Significant in baseline	No effect	8	8	23	23	rs13482156	rs230284694;rs33885392;rs50540424;rs13482156;rs30536736;rs50530980;rs48387725;rs31331272
chr1_12716.3	chr1:154117829-154118079	Exon (ENSMUST00000190485.1/ENSMUST00000190485.1, exon 1 of 4)	dELS,CTCF-bound	Zfp648	3.86096	1	70.3319	68.1592	74.0332	155701160	151921167	166983008	Significant in baseline	No effect	21	21	10	10	rs31404871	rs31226073;rs31206241;rs31201062;rs6267646;rs31180473;rs32707440;rs31173184;rs13476184;rs231234050;rs47680477;rs37068894;rs32571301;rs262053553;rs13476187;rs32380880;rs220024233;rs32238353;rs30592448;rs6181202;rs235136764;rs31598960;rs33692139;rs31404871;rs30497461;rs32737955;rs48733621;rs31266917;rs30694289;rs3696645;rs30471675;rs3722993;rs49525822;rs6209248;rs33742737;rs33740307;rs33739489;rs31…
chr1_12716.5	chr1:154118329-154118579	Distal Intergenic	dELS,CTCF-bound	Zfp648	3.84556	X	17.9593	16.1564	27.5419	58962775	53088279	102126656	Significant in baseline	No effect	13	13	18	18	rs29057773	rs13483757;rs259406772;rs31196532;rs29058484;rs13483765;rs29058309;rs47978544;rs212766299;rs29058288;rs13483768;rs29060832;rs13483769;rs29057816;rs29057773;rs29059808;rs29057552;rs13483770;rs48259763;rs31360508;rs232735621;rs29052163;rs29046879;rs33876026;rs31296287;rs13483813;rs29043238;rs29044678;rs29043152;rs31404716;rs3161011;rs3157124;rs33843040;rs13483818;rs238139072;DXMit1;rs31270235;rs134…
chr1_12719.4	chr1:154149540-154149790	Distal Intergenic		Zfp648	5.45772	1	69.3102	68.2864	69.5646	154143508	152434510	154540240	Significant in baseline	No effect	24	24	7	7	rs262053553	rs31201062;rs6267646;rs31180473;rs32707440;rs31173184;rs13476184;rs231234050;rs47680477;rs37068894;rs32571301;rs262053553;rs13476187;rs32380880;rs220024233;rs32238353
chr1_12719.5	chr1:154149790-154150040	Distal Intergenic		Zfp648	3.98811	1	68.499	67.6483	71.9878	152914150	149797787	163093547	Significant in baseline	No effect	24	24	7	7	rs32707440	rs3680050;rs31640585;rs13476175;rs13476177;rs31897662;rs31230953;rs31226073;rs31206241;rs31201062;rs6267646;rs31180473;rs32707440;rs31173184;rs13476184;rs231234050;rs47680477;rs37068894;rs32571301;rs262053553;rs13476187;rs32380880;rs220024233;rs32238353;rs30592448;rs6181202;rs235136764;rs31598960;rs33692139;rs31404871;rs30497461;rs32737955;rs48733621;rs31266917;rs30694289;rs3696645;rs30471675;rs3…
chr1_12719.5	chr1:154149790-154150040	Distal Intergenic		Zfp648	3.97967	15	17.5657	15.5002	18.8659	31218232	28302726	32481329	Significant in baseline	No effect	10	10	17	17	rs32478382	rs32152729;rs13482497;rs253158222;rs48427909;rs37136498;rs13482498;rs108718789;rs3702361;rs31705252;rs241073119;rs6352269;UNC150507742;rs32197799;rs32478382;rs32406896;rs13482508;rs13482509;rs52686740
chr1_12737.2	chr1:154223793-154224043	Distal Intergenic	CTCF-only,CTCF-bound	Zfp648	4.33835	1	70.3319	68.1592	70.968	155701160	151921167	158373251	Significant in baseline	Protected effect	21	21	10	10	rs31404871	rs31226073;rs31206241;rs31201062;rs6267646;rs31180473;rs32707440;rs31173184;rs13476184;rs231234050;rs47680477;rs37068894;rs32571301;rs262053553;rs13476187;rs32380880;rs220024233;rs32238353;rs30592448;rs6181202;rs235136764;rs31598960;rs33692139;rs31404871;rs30497461;rs32737955;rs48733621;rs31266917;rs30694289;rs3696645;rs30471675;rs3722993;rs49525822;rs6209248;rs33742737
chr1_12737.3	chr1:154224043-154224293	Distal Intergenic	CTCF-only,CTCF-bound	Zfp648	4.94951	1	70.0755	68.1592	70.968	155104914	151921167	158373251	Significant in baseline	Protected effect	22	22	9	9	rs33692139	rs31226073;rs31206241;rs31201062;rs6267646;rs31180473;rs32707440;rs31173184;rs13476184;rs231234050;rs47680477;rs37068894;rs32571301;rs262053553;rs13476187;rs32380880;rs220024233;rs32238353;rs30592448;rs6181202;rs235136764;rs31598960;rs33692139;rs31404871;rs30497461;rs32737955;rs48733621;rs31266917;rs30694289;rs3696645;rs30471675;rs3722993;rs49525822;rs6209248;rs33742737
chr1_12741.2	chr1:154258252-154258502	Promoter (1-2kb)	dELS	4930532M18Rik	3.70678	1	70.968	53.6334	71.3497	158373251	106321454	159479141	Significant in baseline	No effect	21	21	10	10	rs33742737	rs30487561;rs30484039;rs47647099;rs49762567;rs3680216;rs31994637;rs31960226;rs32738873;rs31744083;rs47329570;rs31960159;rs13476045;rs45843892;rs31935680;rs3685919;rs6319405;rs3710646;rs30584583;rs51800183;rs48823920;rs30719160;rs31471077;rs30675648;rs32180662;rs30680977;rs32807094;rs30637341;rs32757674;rs32268077;rs30725178;rs30724278;rs30698282;rs3723088;rs3663708;rs31007558;rs30727085;rs4801580…
chr1_12741.4	chr1:154258752-154259002	Promoter (1-2kb)	dELS	4930532M18Rik	4.0391	14	49.8807	48.7034	50.4015	118462433	117688529	118537399	Significant in baseline	No effect	15	15	15	15	rs30259301	rs6286809;rs3711767;rs30438807;rs30259301;rs49879578
chr1_12745.2	chr1:154292806-154293056	Distal Intergenic	dELS	4930532M18Rik	3.65246	1	69.1829	66.2371	71.3497	153969506	145376780	159479141	Significant in baseline	Protected effect	24	24	7	7	rs32571301	rs31063456;rs31055515;rs32687429;rs32586240;rs31006935;rs31190083;rs13476163;rs30991744;rs30769516;rs3711440;rs6411476;rs3680050;rs31640585;rs13476175;rs13476177;rs31897662;rs31230953;rs31226073;rs31206241;rs31201062;rs6267646;rs31180473;rs32707440;rs31173184;rs13476184;rs231234050;rs47680477;rs37068894;rs32571301;rs262053553;rs13476187;rs32380880;rs220024233;rs32238353;rs30592448;rs6181202;rs235…
chr1_12760.1	chr1:154460065-154460315	Intron (ENSMUST00000187541.6/12290, intron 25 of 46)		Cacna1e	4.22135	1	69.3102	68.2864	70.968	154143508	152434510	158373251	Significant in baseline	Protected effect	24	24	7	7	rs262053553	rs31201062;rs6267646;rs31180473;rs32707440;rs31173184;rs13476184;rs231234050;rs47680477;rs37068894;rs32571301;rs262053553;rs13476187;rs32380880;rs220024233;rs32238353;rs30592448;rs6181202;rs235136764;rs31598960;rs33692139;rs31404871;rs30497461;rs32737955;rs48733621;rs31266917;rs30694289;rs3696645;rs30471675;rs3722993;rs49525822;rs6209248;rs33742737
chr1_12766.4	chr1:154472757-154473007	Exon (ENSMUST00000188384.1/12290, exon 1 of 3)		Cacna1e	3.81929	16	28.637	28.2494	30.5601	54000000	51096759	56462908	Significant in baseline	Protected effect	15	15	13	13	Affy_PC16_54	rs4186333;rs4187112;Affy_PC16_54;rs4188337;rs4188505
chr1_12771.2	chr1:154504393-154504643	Intron (ENSMUST00000187541.6/12290, intron 7 of 46)	dELS	Cacna1e	4.35777	1	70.0755	69.9483	71.0952	155104914	155096387	158380674	Significant in baseline	No effect	22	22	9	9	rs33692139	rs31598960;rs33692139;rs31404871;rs30497461;rs32737955;rs48733621;rs31266917;rs30694289;rs3696645;rs30471675;rs3722993;rs49525822;rs6209248;rs33742737;rs33740307
chr1_128.2	chr1:7180833-7181083	Distal Intergenic		Pcmtd1	3.5637	7	49.8404	48.5602	55.4251	97692111	95983947	111707135	Significant in baseline	Protected effect	18	18	13	13	rs31395168	rs13479416;rs31323776;rs31894020;rs31494684;rs31541427;rs31551122;rs48613317;rs31587646;rs51057795;rs3657451;rs31593239;rs46652854;rs215332869;rs31395168;UNC070814219;rs31636432;rs8281437;rs32240657;rs108409665;rs32184354;rs32024762;rs48975428;rs260604888;rs31765528;rs32433796;rs31811139;rs31794102;rs13479440;rs13479441;rs31920772;rs46331406;rs31799039;rs51978362;rs13479447;rs31153090;rs45761847;…
chr1_12814.1	chr1:154748473-154748723	Intron (ENSMUST00000211821.1/12290, intron 1 of 46)		Cacna1e	4.44244	5	7.859	7.30714	8.33083	17009997	16608488	18906696	Significant in baseline	No effect	15	15	15	15	rs13478117	rs33583186;rs33239535;rs49074950;rs13478117;rs33197550;rs31727027;rs33045702
chr1_12819.6	chr1:154783825-154784075	Intron (ENSMUST00000211821.1/12290, intron 1 of 46)		Cacna1e	3.89925	11	57.8968	56.1906	59.8249	101470182	100929024	103717494	Significant in baseline	No effect	14	14	17	17	rs29431671	rs3154428;rs47248855;rs29422564;rs27057342;rs29431671;rs13481194;rs48815028;UNC110164426;rs29454846;rs29453966;rs13481196;rs29466020;rs3709793;rs29410236;rs13481201;rs29419039;rs27008683;rs27021619;rs3690511
chr1_12821.1	chr1:154785392-154785642	Intron (ENSMUST00000211821.1/12290, intron 1 of 46)		Cacna1e	4.90395	12	61.662	61.2783	62.1748	117577251	117389928	119052156	Significant in baseline	No effect	14	14	17	17	rs30964684	rs3694890;rs52428434;rs30964684;rs3657665;rs48941180;rs4135448
chr1_12833.1	chr1:154826461-154826711	Intron (ENSMUST00000211821.1/12290, intron 1 of 46)		Cacna1e	5.82815	1	69.9483	69.4374	71.3497	155096387	154532837	159479141	Significant in baseline	No effect	22	22	9	9	rs31598960	rs220024233;rs32238353;rs30592448;rs6181202;rs235136764;rs31598960;rs33692139;rs31404871;rs30497461;rs32737955;rs48733621;rs31266917;rs30694289;rs3696645;rs30471675;rs3722993;rs49525822;rs6209248;rs33742737;rs33740307;rs33739489;rs31315479;rs31303858
chr1_12856.2	chr1:155011060-155011310	Distal Intergenic		Gm9530	3.63285	1	71.0952	68.4137	71.7333	158380674	152914150	161981980	Significant in baseline	Protected effect	20	20	11	11	rs33740307	rs32707440;rs31173184;rs13476184;rs231234050;rs47680477;rs37068894;rs32571301;rs262053553;rs13476187;rs32380880;rs220024233;rs32238353;rs30592448;rs6181202;rs235136764;rs31598960;rs33692139;rs31404871;rs30497461;rs32737955;rs48733621;rs31266917;rs30694289;rs3696645;rs30471675;rs3722993;rs49525822;rs6209248;rs33742737;rs33740307;rs33739489;rs31315479;rs31303858;rs47852191;rs3693161;rs31694619;rs62…
chr1_12867.2	chr1:155027691-155027941	Intron (ENSMUST00000190720.1/ENSMUST00000190720.1, intron 1 of 3)	dELS	Gm9530	4.39562	X	49.7038	47.7559	50.6023	164079038	161585623	166340107	Significant in baseline	Up effect	22	22	9	9	rs31223993	rs13484098;rs46575648;rs259528541;rs31223993;rs31260623;rs31457049;rs3657281;rs6362954;rs31466210;rs212815990;rs227685113;rs31551153
chr1_12881.1	chr1:155070670-155070920	Intron (ENSMUST00000181160.2/671336, intron 3 of 6)	dELS	Gm9530	3.95519	1	69.9483	68.2864	70.968	155096387	152434510	158373251	Significant in baseline	Protected effect	22	22	9	9	rs31598960	rs31201062;rs6267646;rs31180473;rs32707440;rs31173184;rs13476184;rs231234050;rs47680477;rs37068894;rs32571301;rs262053553;rs13476187;rs32380880;rs220024233;rs32238353;rs30592448;rs6181202;rs235136764;rs31598960;rs33692139;rs31404871;rs30497461;rs32737955;rs48733621;rs31266917;rs30694289;rs3696645;rs30471675;rs3722993;rs49525822;rs6209248;rs33742737
chr1_12881.3	chr1:155071170-155071420	Intron (ENSMUST00000181160.2/671336, intron 3 of 6)		Gm9530	3.56094	2	8.546	7.32211	17.4076	13600088	11785865	30794170	Significant in baseline	No effect	15	15	13	13	rs29825025	rs13476350;rs13476352;rs29825025;rs13476355;Affy_PC2_15;rs13476358;rs27126014;rs29503212;rs27125983;rs27125935;rs6384589;rs13476363;rs27144318;rs33092900;rs13476364;rs27127331;rs49733425;rs27140323;rs6292983;rs27136990;rs27137272;rs13476379;rs6193345;rs29866286;rs27219279;rs52428815;rs6286688;rs33287256;rs32869517;rs33279854;rs13476386;rs27186439;rs33369549;rs27195273;rs33136036;rs13476390;rs3308…
chr1_12886.1	chr1:155080821-155081071	Promoter (2-3kb)		Gm9530	4.42512	7	49.0711	46.7552	70.3267	96650270	89835648	133996942	Significant in baseline	No effect	18	18	13	13	rs31551122	rs32416091;rs31867408;rs32124327;rs31349093;rs31709999;rs32510496;rs31238492;rs31093558;rs4226783;rs31732570;rs36361468;rs32131184;rs31481725;rs51546480;rs13479416;rs31323776;rs31894020;rs31494684;rs31541427;rs31551122;rs48613317;rs31587646;rs51057795;rs3657451;rs31593239;rs46652854;rs215332869;rs31395168;UNC070814219;rs31636432;rs8281437;rs32240657;rs108409665;rs32184354;rs32024762;rs48975428;rs…
chr1_12892.5	chr1:155092443-155092693	Distal Intergenic	dELS	Ier5	4.4369	1	71.0952	68.4137	71.6061	158380674	152914150	160285089	Significant in baseline	No effect	20	20	11	11	rs33740307	rs32707440;rs31173184;rs13476184;rs231234050;rs47680477;rs37068894;rs32571301;rs262053553;rs13476187;rs32380880;rs220024233;rs32238353;rs30592448;rs6181202;rs235136764;rs31598960;rs33692139;rs31404871;rs30497461;rs32737955;rs48733621;rs31266917;rs30694289;rs3696645;rs30471675;rs3722993;rs49525822;rs6209248;rs33742737;rs33740307;rs33739489;rs31315479;rs31303858;rs47852191;rs3693161
chr1_12920.23	chr1:155213819-155214069	Exon (ENSMUST00000185937.1/ENSMUST00000185937.1, exon 1 of 1)		BC034090	3.85458	16	33.1164	32.6056	35.0507	63744821	61486102	66934241	Significant in baseline	No effect	15	15	13	13	rs51363736	rs4193183;rs4193184;rs4193362;rs46860886;rs4194373;rs4195259;rs51363736;rs4195364;rs4151935;rs3667153;rs4195970;rs224522344;rs240260626;rs52468861;rs4196243;rs4197031;rs45658002;rs4197412;rs4197453;rs4197662;rs4197673
chr1_12920.5	chr1:155209319-155209569	Distal Intergenic		Stx6	3.86504	18	4.69389	3.17874	7.0406	11084830	9902168	15638699	Significant in baseline	No effect	15	15	16	16	rs4231742	rs13483200;rs4231742;rs6377403;UNCHS045463;UNCHS045465;CEAJAX00080374;rs48201165;rs13483213;rs239852520;rs29624709;rs31030509;rs13483217;rs29624764;rs13483224
chr1_12920.9	chr1:155210319-155210569	Distal Intergenic	dELS	BC034090	4.49637	1	69.821	68.2864	70.0755	154609113	152434510	155104914	Significant in baseline	No effect	23	23	8	8	rs6181202	rs31201062;rs6267646;rs31180473;rs32707440;rs31173184;rs13476184;rs231234050;rs47680477;rs37068894;rs32571301;rs262053553;rs13476187;rs32380880;rs220024233;rs32238353;rs30592448;rs6181202;rs235136764;rs31598960;rs33692139
chr1_12923.13	chr1:155224088-155224338	Promoter (<=1kb)	dELS; dELS,CTCF-bound	BC034090	4.74573	1	70.0755	68.1592	71.0952	155104914	151921167	158380674	Significant in baseline	Protected effect	22	22	9	9	rs33692139	rs31226073;rs31206241;rs31201062;rs6267646;rs31180473;rs32707440;rs31173184;rs13476184;rs231234050;rs47680477;rs37068894;rs32571301;rs262053553;rs13476187;rs32380880;rs220024233;rs32238353;rs30592448;rs6181202;rs235136764;rs31598960;rs33692139;rs31404871;rs30497461;rs32737955;rs48733621;rs31266917;rs30694289;rs3696645;rs30471675;rs3722993;rs49525822;rs6209248;rs33742737;rs33740307
chr1_12929.3	chr1:155244441-155244691	Promoter (<=1kb)	dELS	BC034090	4.01562	19	34.7365	30.5383	35.2513	37868206	35618003	38037133	Significant in baseline	No effect	16	16	15	15	rs31284681	rs13483605;rs13483606;rs46794354;rs13483609;rs30498947;UNC190040805;rs3713879;rs30504012;rs30771319;rs30363927;rs13483614;rs30454330;rs37055925;rs3653886;rs30324800;rs30619399;rs31284681;rs39061218;rs36785649;rs36719894
chr1_1294.3	chr1:26283042-26283292	Distal Intergenic	dELS	Spata31e2	3.6539	1	19.7778	14.0905	21.5707	38225635	25700998	39521927	Significant in baseline	No effect	18	18	13	13	rs32988364	rs32249228;rs32331653;rs32086436;rs48222526;rs223334166;rs31670161;rs31134323;rs47868189;rs31600419;rs30514876;rs32110348;rs31590459;rs32372810;rs32684509;rs230225148;rs48664698;rs32760971;rs31818207;rs30598074;rs13475795;rs30849932;rs46323879;rs31518908;rs31710287;rs16808053;rs221967485;rs47717565;rs13475808;rs30604008;rs30525912;rs13475810;rs13475816;rs32180312;rs31935537;rs32551229;rs32942136;…
chr1_1294.4	chr1:26283292-26283542	Distal Intergenic	dELS	Spata31e2	3.81283	1	14.2178	14.0905	26.1323	25827733	25700998	43564847	Significant in baseline	No effect	16	16	15	15	rs32331653	rs32249228;rs32331653;rs32086436;rs48222526;rs223334166;rs31670161;rs31134323;rs47868189;rs31600419;rs30514876;rs32110348;rs31590459;rs32372810;rs32684509;rs230225148;rs48664698;rs32760971;rs31818207;rs30598074;rs13475795;rs30849932;rs46323879;rs31518908;rs31710287;rs16808053;rs221967485;rs47717565;rs13475808;rs30604008;rs30525912;rs13475810;rs13475816;rs32180312;rs31935537;rs32551229;rs32942136;…
chr1_12981.3	chr1:155698803-155699053	3' UTR		Lhx4	3.6771	14	52.855	50.7832	52.855	124108797	118814469	124108797	Significant in baseline	No effect	14	14	16	16	rs31233932	rs30152734;rs31445132;UNC140408279;rs31102190;rs13482395;rs13482396;rs48845797;rs30801242;rs30852708;rs30792453;rs47251162;rs3691815;rs49957564;rs51911760;rs6384035;rs46397554;rs31233932
chr1_12984.1	chr1:155702239-155702489	Exon (ENSMUST00000027740.13/16872, exon 6 of 6)		Lhx4	4.51265	7	39.4176	37.473	41.0853	73340513	71410581	74866272	Significant in baseline	No effect	18	18	13	13	rs13479334	rs47119834;rs31882027;rs13479326;rs31453122;rs32299443;rs31064232;rs46054811;rs31783952;rs227095692;rs31342575;rs31623161;rs31597771;rs31246895;rs13479334;UNC070318260;rs3691951;rs31985217;rs49704812;rs32052013;rs31223769;rs16793804;rs8268441;rs36604679;rs49388131;rs31807959;rs32310436;rs48673245
chr1_12992.3	chr1:155715358-155715608	Intron (ENSMUST00000027740.13/16872, intron 2 of 5)		Lhx4	7.15246	1	70.968	70.3319	70.968	158373251	155701160	158373251	Significant in baseline	No effect	21	21	10	10	rs33742737	rs31404871;rs30497461;rs32737955;rs48733621;rs31266917;rs30694289;rs3696645;rs30471675;rs3722993;rs49525822;rs6209248;rs33742737
chr1_12992.4	chr1:155715608-155715858	Intron (ENSMUST00000027740.13/16872, intron 2 of 5)		Lhx4	5.02583	1	71.0952	70.3319	71.6061	158380674	155701160	160285089	Significant in baseline	No effect	20	20	11	11	rs33740307	rs31404871;rs30497461;rs32737955;rs48733621;rs31266917;rs30694289;rs3696645;rs30471675;rs3722993;rs49525822;rs6209248;rs33742737;rs33740307;rs33739489;rs31315479;rs31303858;rs47852191;rs3693161
chr1_12997.2	chr1:155723017-155723267	Intron (ENSMUST00000027740.13/16872, intron 2 of 5)		Lhx4	3.93542	5	38.6684	35.5097	39.5649	69357018	66170883	73828510	Significant in baseline	No effect	7	7	21	21	rs52382600	rs108796859;rs33381525;rs3659098;rs31502646;rs52382600;rs13478320;rs33034992;rs29634610;rs29501536;rs6409508;rs3707918;rs3670420;rs6163111
chr1_13001.6	chr1:155742352-155742602	Promoter (<=1kb)	DNase-H3K4me3; pELS,CTCF-bound	Lhx4	4.54666	1	26.3868	23.9333	27.2793	43686349	41796848	45915046	Significant in baseline	No effect	17	17	14	14	rs33447118	rs30667783;rs29552839;rs29633641;rs31864177;rs13475833;rs33275490;rs3714219;rs32671223;rs33392587;rs52628759;rs31652254;rs32044299;rs31012703;rs33444638;rs33447118;rs33447121;rs47782085;rs50434840;rs30761526;rs31572802;rs31555041;rs31885358;rs31983590;rs33586566
chr1_13011.9	chr1:155786314-155786564	Intron (ENSMUST00000035325.14/104009, intron 8 of 11)		Qsox1	3.78863	14	44.8225	41.7172	46.2542	105887547	103565150	111030179	Significant in baseline	No effect	19	19	10	10	rs13482354	rs13482348;rs32436494;rs33858318;rs36445774;rs13482349;rs32493279;rs48603130;rs13482354;rs3654132;rs31177297;rs47602612;D14Mit165;rs30543008;rs6410104;rs3681491;rs31504939;rs3674260;rs4139535;rs30699087;rs51819433
chr1_1302.1	chr1:26685926-26686176	Promoter (1-2kb)	DNase-H3K4me3	Spata31e2	7.53872	1	14.2178	14.0905	14.6014	25827733	25700998	27306300	Significant in baseline	No effect	16	16	15	15	rs32331653	rs32249228;rs32331653;rs32086436;rs48222526;rs223334166
chr1_1302.1	chr1:26685926-26686176	Promoter (1-2kb)	DNase-H3K4me3	Spata31e2	3.35368	17	25.97	25.4136	30.4591	52367518	51444746	61341882	Significant in baseline	No effect	19	19	11	11	rs108472693	rs33120395;rs33227443;rs29540697;rs13483026;rs108472693;rs107973496;rs49859441;rs48107437;rs48016037;rs29535974;rs33649718;D17Mit274;rs48771596;rs50311424;rs3701810;rs33298619;rs33350436;rs29662941;rs29658587;rs3714226;rs48234356;rs49531041;rs3714819;rs3709414;rs46754061;rs33484083;rs33169019;rs52285176;rs13483057
chr1_1302.2	chr1:26686176-26686426	Promoter (1-2kb)	DNase-H3K4me3	Spata31e2	8.13137	1	14.0905	14.0905	14.6014	25700998	25700998	27306300	Significant in baseline	Protected effect	16	16	15	15	rs32249228	rs32249228;rs32331653;rs32086436;rs48222526;rs223334166
chr1_1302.3	chr1:26686426-26686676	Promoter (<=1kb)		Spata31e2	6.4648	1	14.0905	14.0905	15.3648	25700998	25700998	30851224	Significant in baseline	No effect	16	16	15	15	rs32249228	rs32249228;rs32331653;rs32086436;rs48222526;rs223334166;rs31670161;rs31134323;rs47868189;rs31600419;rs30514876;rs32110348;rs31590459;rs32372810;rs32684509
chr1_1302.4	chr1:26686676-26686926	Promoter (<=1kb)		Spata31e2	5.41096	1	14.2178	14.0905	16.0088	25827733	25700998	32082234	Significant in baseline	No effect	16	16	15	15	rs32331653	rs32249228;rs32331653;rs32086436;rs48222526;rs223334166;rs31670161;rs31134323;rs47868189;rs31600419;rs30514876;rs32110348;rs31590459;rs32372810;rs32684509;rs230225148;rs48664698;rs32760971
chr1_1302.5	chr1:26686926-26687176	Promoter (<=1kb)		Spata31e2	7.83719	1	14.2178	14.0905	15.3648	25827733	25700998	30851224	Significant in baseline	No effect	16	16	15	15	rs32331653	rs32249228;rs32331653;rs32086436;rs48222526;rs223334166;rs31670161;rs31134323;rs47868189;rs31600419;rs30514876;rs32110348;rs31590459;rs32372810;rs32684509
chr1_1302.6	chr1:26687176-26687426	Promoter (<=1kb)		Spata31e2	7.82771	1	14.2178	14.0905	15.3648	25827733	25700998	30851224	Significant in baseline	No effect	16	16	15	15	rs32331653	rs32249228;rs32331653;rs32086436;rs48222526;rs223334166;rs31670161;rs31134323;rs47868189;rs31600419;rs30514876;rs32110348;rs31590459;rs32372810;rs32684509
chr1_1302.7	chr1:26687426-26687676	Promoter (<=1kb)		Spata31e2	7.97664	1	14.2178	14.0905	14.9831	25827733	25700998	29155851	Significant in baseline	No effect	16	16	15	15	rs32331653	rs32249228;rs32331653;rs32086436;rs48222526;rs223334166;rs31670161;rs31134323;rs47868189;rs31600419;rs30514876
chr1_1302.8	chr1:26687676-26687926	Promoter (<=1kb)		Spata31e2	6.62625	1	14.2178	14.0905	14.345	25827733	25700998	27253420	Significant in baseline	No effect	16	16	15	15	rs32331653	rs32249228;rs32331653;rs32086436;rs48222526
chr1_1302.9	chr1:26687926-26688176	Promoter (<=1kb)		Spata31e2	8.19924	1	14.2178	14.0905	14.345	25827733	25700998	27253420	Significant in baseline	No effect	16	16	15	15	rs32331653	rs32249228;rs32331653;rs32086436;rs48222526
chr1_13031.2	chr1:155972533-155972783	Promoter (<=1kb)	dELS	Cep350	4.1934	13	36.706	33.8957	39.1986	80737850	72968925	83116379	Significant in baseline	No effect	21	21	9	9	rs3702220	rs13481874;rs3712509;rs3664096;rs45660594;rs48459065;rs52119906;rs265630082;rs29853832;rs250068653;rs3702220;rs3721039;rs29574495;rs29805789;rs13481905;rs3686754;rs51375527;rs48216449;rs51541230;rs50114462
chr1_13047.2	chr1:156072461-156072711	Distal Intergenic		Tor1aip2	3.5524	8	49.5024	42.4053	55.1964	115700700	106631922	123289925	Significant in baseline	No effect	15	15	16	16	rs33032461	rs33015720;rs33004646;rs6180306;rs52431037;rs52240807;rs30960224;rs6182338;rs13479970;rs33551061;rs31013353;rs33519536;rs49094676;rs50465429;rs31021623;rs31032628;rs3715791;rs13479975;UNC080532671;rs32928525;rs225424560;rs31084940;rs3656921;rs3662808;rs31158659;rs31161793;rs32674736;rs32780597;rs51217319;rs33570756;rs13479984;rs33110413;rs13479987;rs13479993;rs37325528;rs49552855;rs37229383;rs134…
chr1_13051.3	chr1:156079006-156079256	Exon (ENSMUST00000015628.3/329274, exon 5 of 5)		Tor1aip2	4.69833	1	53.8878	52.4844	59.9029	106591714	99889934	127154464	Significant in baseline	No effect	20	20	11	11	rs49762567	rs36618375;rs13476012;rs30966514;rs51210174;rs13476025;rs31806216;rs13476030;rs32565357;rs32697536;rs30506144;rs30488981;rs30487561;rs30484039;rs47647099;rs49762567;rs3680216;rs31994637;rs31960226;rs32738873;rs31744083;rs47329570;rs31960159;rs13476045;rs45843892;rs31935680;rs3685919;rs6319405;rs3710646;rs30584583;rs51800183;rs48823920;rs30719160;rs31471077;rs30675648;rs32180662;rs30680977;rs32807…
chr1_13051.3	chr1:156079006-156079256	Exon (ENSMUST00000015628.3/329274, exon 5 of 5)		Tor1aip2	3.86807	1	70.3319	69.9483	70.968	155701160	155096387	158373251	Significant in baseline	No effect	21	21	10	10	rs31404871	rs31598960;rs33692139;rs31404871;rs30497461;rs32737955;rs48733621;rs31266917;rs30694289;rs3696645;rs30471675;rs3722993;rs49525822;rs6209248;rs33742737
chr1_13053.1	chr1:156085712-156085962	Intron (ENSMUST00000015628.3/329274, intron 2 of 4)	CTCF-only,CTCF-bound	Tor1aip2	3.96293	1	72.115	34.1998	76.6714	163312366	59379132	170949421	Significant in baseline	No effect	17	17	14	14	rs32045036	rs13475883;rs13475885;rs13475887;rs49196471;rs29963534;rs32161565;rs32416624;rs3703813;rs52470670;rs3162895;rs30173232;rs30465484;rs45845149;rs31727300;rs32848413;rs30230950;rs32347478;rs33859501;rs30993227;rs51246399;rs30297732;rs30284166;rs3722989;rs3665792;rs13475907;rs32080982;rs31292260;rs48130521;rs36768099;rs13475913;rs30948259;rs37034472;rs31200269;rs3687595;rs238728371;rs31428112;rs13475…
chr1_13061.1	chr1:156217505-156217695	Distal Intergenic	dELS	Fam163a	4.75574	1	71.0952	68.2864	71.3497	158380674	152434510	159479141	Significant in baseline	Protected effect	20	20	11	11	rs33740307	rs31201062;rs6267646;rs31180473;rs32707440;rs31173184;rs13476184;rs231234050;rs47680477;rs37068894;rs32571301;rs262053553;rs13476187;rs32380880;rs220024233;rs32238353;rs30592448;rs6181202;rs235136764;rs31598960;rs33692139;rs31404871;rs30497461;rs32737955;rs48733621;rs31266917;rs30694289;rs3696645;rs30471675;rs3722993;rs49525822;rs6209248;rs33742737;rs33740307;rs33739489;rs31315479;rs31303858
chr1_13063.1	chr1:156241820-156242070	Distal Intergenic	CTCF-only,CTCF-bound	Tdrd5	3.89711	7	75.3957	72.882	75.9066	136815177	134827021	137863701	Significant in baseline	No effect	10	10	21	21	rs31027034	rs32302795;rs31593094;rs33419590;rs31515968;rs33423671;rs31161087;rs31846294;rs31549621;rs32400680;rs31027034;rs31650519;rs6334210;rs31662845;rs31775324;rs32092554;rs50259190
chr1_13067.1	chr1:156273745-156273979	Promoter (<=1kb)		Tdrd5	3.83203	1	16.499	8.15019	19.2669	32082234	18496617	37710746	Significant in baseline	Protected effect	16	16	12	12	rs32760971	rs219716413;rs13475747;rs51820747;rs51700370;rs52118613;rs31772262;rs3670611;rs224386739;rs36660068;rs6404446;rs32101154;rs6253968;rs32315565;rs31766107;rs46856073;rs46249537;rs31949292;rs30499557;rs6316488;rs32400861;rs32597415;rs228543676;rs239824187;rs13475765;rs4222215;rs13475766;rs31567874;rs32245765;rs32487442;rs13475771;rs13475772;rs32249228;rs32331653;rs32086436;rs48222526;rs223334166;rs3…
chr1_13081.1	chr1:156540275-156540466	Distal Intergenic	CTCF-only,CTCF-bound	Abl2	3.82666	19	48.2092	47.8255	51.658	53706694	53103019	57214024	Significant in baseline	No effect	22	22	9	9	rs30963501	rs30619556;rs30352878;rs31013688;rs255053457;rs30963501;rs37555706;rs47782010;rs49416918;rs37133893;rs13483679;rs31086507;rs31161957;rs30663834;rs30511575;rs13483680;rs30419327;rs31016287;rs30771808;rs3654713;rs6192198;rs30699427;rs30611885;rs37882353;rs13483683;rs51466107;rs31045530;rs30370218;rs223675540;rs30372122;rs33851309;rs51242251;rs30368862;rs252546362;rs6355398;rs30851692;rs50117046;rs3…
chr1_13087.3	chr1:156581422-156581672	Intron (ENSMUST00000173929.7/11352, intron 1 of 2)		Abl2	5.07973	1	70.968	70.3319	71.6061	158373251	155701160	160285089	Significant in baseline	No effect	21	21	10	10	rs33742737	rs31404871;rs30497461;rs32737955;rs48733621;rs31266917;rs30694289;rs3696645;rs30471675;rs3722993;rs49525822;rs6209248;rs33742737;rs33740307;rs33739489;rs31315479;rs31303858;rs47852191;rs3693161
chr1_13108.6	chr1:156655848-156656098	Promoter (2-3kb)		Tor3a	3.52595	2	15.546	11.7858	22.0157	27062175	19078724	44401774	Significant in baseline	No effect	15	15	13	13	rs13465578	rs13476364;rs27127331;rs49733425;rs27140323;rs6292983;rs27136990;rs27137272;rs13476379;rs6193345;rs29866286;rs27219279;rs52428815;rs6286688;rs33287256;rs32869517;rs33279854;rs13476386;rs27186439;rs33369549;rs27195273;rs33136036;rs13476390;rs33081937;rs27184053;rs27185513;rs13465578;rs32863453;rs13476408;rs33734426;rs230572488;rs49829810;rs51006262;rs13476413;rs33371101;rs13474428;rs13459060;rs282…
chr1_13112.6	chr1:156667355-156667605	Promoter (<=1kb)	pELS	Tor3a	5.69596	1	70.3319	69.9483	70.968	155701160	155096387	158373251	Significant in baseline	Protected effect	21	21	10	10	rs31404871	rs31598960;rs33692139;rs31404871;rs30497461;rs32737955;rs48733621;rs31266917;rs30694289;rs3696645;rs30471675;rs3722993;rs49525822;rs6209248;rs33742737
chr1_13112.7	chr1:156667605-156667855	Promoter (<=1kb)	pELS	Tor3a	3.68367	1	70.3319	53.1225	92.8648	155701160	104876883	189361953	Significant in baseline	No effect	21	21	10	10	rs31404871	rs13476030;rs32565357;rs32697536;rs30506144;rs30488981;rs30487561;rs30484039;rs47647099;rs49762567;rs3680216;rs31994637;rs31960226;rs32738873;rs31744083;rs47329570;rs31960159;rs13476045;rs45843892;rs31935680;rs3685919;rs6319405;rs3710646;rs30584583;rs51800183;rs48823920;rs30719160;rs31471077;rs30675648;rs32180662;rs30680977;rs32807094;rs30637341;rs32757674;rs32268077;rs30725178;rs30724278;rs30698…
chr1_1312.1	chr1:27306829-27307079	Distal Intergenic		Gm5524	6.41178	1	14.499	14.0905	17.084	27306300	25700998	32343834	Significant in baseline	No effect	16	16	14	14	rs223334166	rs32249228;rs32331653;rs32086436;rs48222526;rs223334166;rs31670161;rs31134323;rs47868189;rs31600419;rs30514876;rs32110348;rs31590459;rs32372810;rs32684509;rs230225148;rs48664698;rs32760971;rs31818207;rs30598074
chr1_13128.2	chr1:156710751-156711001	Intron (ENSMUST00000086153.7/215015, intron 1 of 7)	dELS	Fam20b	5.00536	1	70.4591	69.4374	70.968	155809944	154532837	158373251	Significant in baseline	No effect	21	21	10	10	rs32737955	rs220024233;rs32238353;rs30592448;rs6181202;rs235136764;rs31598960;rs33692139;rs31404871;rs30497461;rs32737955;rs48733621;rs31266917;rs30694289;rs3696645;rs30471675;rs3722993;rs49525822;rs6209248;rs33742737
chr1_13160.1	chr1:156864197-156864447	Intron (ENSMUST00000172057.7/78255, intron 7 of 18)	dELS	Angptl1	5.18232	1	70.4591	70.0755	70.968	155809944	155104914	158373251	Significant in baseline	No effect	21	21	10	10	rs32737955	rs33692139;rs31404871;rs30497461;rs32737955;rs48733621;rs31266917;rs30694289;rs3696645;rs30471675;rs3722993;rs49525822;rs6209248;rs33742737
chr1_13165.1	chr1:156913260-156913510	Intron (ENSMUST00000191605.6/78255, intron 1 of 19)		Ralgps2	4.43371	1	70.968	69.9483	71.0952	158373251	155096387	158380674	Significant in baseline	No effect	21	21	10	10	rs33742737	rs31598960;rs33692139;rs31404871;rs30497461;rs32737955;rs48733621;rs31266917;rs30694289;rs3696645;rs30471675;rs3722993;rs49525822;rs6209248;rs33742737;rs33740307
chr1_13177.2	chr1:156995375-156995625	Intron (ENSMUST00000190681.1/ENSMUST00000190681.1, intron 2 of 2)	dELS	Ralgps2	6.68043	1	70.968	70.3319	71.0952	158373251	155701160	158380674	Significant in baseline	Protected effect	21	21	10	10	rs33742737	rs31404871;rs30497461;rs32737955;rs48733621;rs31266917;rs30694289;rs3696645;rs30471675;rs3722993;rs49525822;rs6209248;rs33742737;rs33740307
chr1_13181.1	chr1:157019860-157020110	Intron (ENSMUST00000190681.1/ENSMUST00000190681.1, intron 2 of 2)	dELS	Ralgps2	4.70219	1	70.968	69.9483	71.7333	158373251	155096387	161981980	Significant in baseline	No effect	21	21	10	10	rs33742737	rs31598960;rs33692139;rs31404871;rs30497461;rs32737955;rs48733621;rs31266917;rs30694289;rs3696645;rs30471675;rs3722993;rs49525822;rs6209248;rs33742737;rs33740307;rs33739489;rs31315479;rs31303858;rs47852191;rs3693161;rs31694619;rs6255075
chr1_13190.5	chr1:157076409-157076659	Distal Intergenic	DNase-H3K4me3,CTCF-bound	Tex35	6.93352	1	70.3319	70.0755	70.968	155701160	155104914	158373251	Significant in baseline	No effect	21	21	10	10	rs31404871	rs33692139;rs31404871;rs30497461;rs32737955;rs48733621;rs31266917;rs30694289;rs3696645;rs30471675;rs3722993;rs49525822;rs6209248;rs33742737
chr1_13190.9	chr1:157077409-157077659	Distal Intergenic	DNase-H3K4me3,CTCF-bound	Tex35	3.84938	1	70.3319	66.6207	71.3497	155701160	146745009	159479141	Significant in baseline	No effect	21	21	10	10	rs31404871	rs31006935;rs31190083;rs13476163;rs30991744;rs30769516;rs3711440;rs6411476;rs3680050;rs31640585;rs13476175;rs13476177;rs31897662;rs31230953;rs31226073;rs31206241;rs31201062;rs6267646;rs31180473;rs32707440;rs31173184;rs13476184;rs231234050;rs47680477;rs37068894;rs32571301;rs262053553;rs13476187;rs32380880;rs220024233;rs32238353;rs30592448;rs6181202;rs235136764;rs31598960;rs33692139;rs31404871;rs30…
chr1_13191.4	chr1:157078816-157079066	Distal Intergenic		Tex35	3.90834	15	30.619	28.8688	33.3839	63432710	60038735	68830704	Significant in baseline	No effect	7	7	19	19	rs31075737	rs47695923;rs32286262;rs13482605;rs32010938;rs6350909;rs212881033;rs31583755;rs31064085;rs31691968;rs31075737;rs13482610;D15Mit63;rs32109088;rs49652551;rs3708614;rs31222130;rs31253048;rs31265809;rs31983867
chr1_13229.5	chr1:157169482-157169732	Intron (ENSMUST00000078308.12/226525, intron 9 of 17)		Rasal2	5.09269	1	70.968	70.0755	71.3497	158373251	155104914	159479141	Significant in baseline	No effect	21	21	10	10	rs33742737	rs33692139;rs31404871;rs30497461;rs32737955;rs48733621;rs31266917;rs30694289;rs3696645;rs30471675;rs3722993;rs49525822;rs6209248;rs33742737;rs33740307;rs33739489;rs31315479;rs31303858
chr1_13248.1	chr1:157256551-157256801	Promoter (<=1kb)	dELS	Rasal2	5.19841	1	70.499	70.0755	70.968	155809944	155104914	158373251	Significant in baseline	No effect	21	21	10	10	rs32737955	rs33692139;rs31404871;rs30497461;rs32737955;rs48733621;rs31266917;rs30694289;rs3696645;rs30471675;rs3722993;rs49525822;rs6209248;rs33742737
chr1_13268.9	chr1:157444955-157445205	Distal Intergenic	dELS	Cryzl2	3.78006	18	39.1413	31.3596	43.0086	66143244	60000000	68603409	Significant in baseline	No effect	18	18	13	13	rs29770804	Affy_PC18_60;Affy_PC18_61;Affy_PC18_62;Affy_4809913;rs29557439;rs13483407;rs29775877;rs45932736;rs3658391;rs46094763;rs29770804;rs49823091;rs52714787;rs46965069;D18Mit184;rs36626604;rs3716803;rs30212048;rs29557040;rs29774204;rs29967647;rs29539715;rs30216358;rs6346101;rs29984158;rs38772382
chr1_13269.1	chr1:157445517-157445767	Distal Intergenic	dELS	Cryzl2	4.5899	1	70.4591	70.3319	71.6061	155809944	155701160	160285089	Significant in baseline	No effect	21	21	10	10	rs32737955	rs31404871;rs30497461;rs32737955;rs48733621;rs31266917;rs30694289;rs3696645;rs30471675;rs3722993;rs49525822;rs6209248;rs33742737;rs33740307;rs33739489;rs31315479;rs31303858;rs47852191;rs3693161
chr1_13283.1	chr1:157507843-157508093	Promoter (1-2kb)		Sec16b	4.06412	1	70.3319	68.4137	71.0952	155701160	152914150	158380674	Significant in baseline	No effect	21	21	10	10	rs31404871	rs32707440;rs31173184;rs13476184;rs231234050;rs47680477;rs37068894;rs32571301;rs262053553;rs13476187;rs32380880;rs220024233;rs32238353;rs30592448;rs6181202;rs235136764;rs31598960;rs33692139;rs31404871;rs30497461;rs32737955;rs48733621;rs31266917;rs30694289;rs3696645;rs30471675;rs3722993;rs49525822;rs6209248;rs33742737;rs33740307
chr1_13302.7	chr1:157554096-157554346	Intron (ENSMUST00000086130.8/89867, intron 16 of 27)		Sec16b	3.95441	1	71.0952	68.1592	71.9878	158380674	151921167	163093547	Significant in baseline	No effect	20	20	11	11	rs33740307	rs31226073;rs31206241;rs31201062;rs6267646;rs31180473;rs32707440;rs31173184;rs13476184;rs231234050;rs47680477;rs37068894;rs32571301;rs262053553;rs13476187;rs32380880;rs220024233;rs32238353;rs30592448;rs6181202;rs235136764;rs31598960;rs33692139;rs31404871;rs30497461;rs32737955;rs48733621;rs31266917;rs30694289;rs3696645;rs30471675;rs3722993;rs49525822;rs6209248;rs33742737;rs33740307;rs33739489;rs31…
chr1_13302.8	chr1:157554346-157554596	Intron (ENSMUST00000086130.8/89867, intron 16 of 27)		Sec16b	5.28251	1	71.499	70.3319	71.9878	160285089	155701160	163093547	Significant in baseline	No effect	17	17	12	12	rs3693161	rs31404871;rs30497461;rs32737955;rs48733621;rs31266917;rs30694289;rs3696645;rs30471675;rs3722993;rs49525822;rs6209248;rs33742737;rs33740307;rs33739489;rs31315479;rs31303858;rs47852191;rs3693161;rs31694619;rs6255075;rs31200652;rs3685643;rs4222751;rs46133782;rs49476641
chr1_13304.2	chr1:157565475-157565725	Exon (ENSMUST00000086130.8/89867, exon 25 of 28)		Sec16b	3.53633	1	69.5646	68.2864	71.7333	154540240	152434510	161981980	Significant in baseline	No effect	23	23	7	7	rs32238353	rs31201062;rs6267646;rs31180473;rs32707440;rs31173184;rs13476184;rs231234050;rs47680477;rs37068894;rs32571301;rs262053553;rs13476187;rs32380880;rs220024233;rs32238353;rs30592448;rs6181202;rs235136764;rs31598960;rs33692139;rs31404871;rs30497461;rs32737955;rs48733621;rs31266917;rs30694289;rs3696645;rs30471675;rs3722993;rs49525822;rs6209248;rs33742737;rs33740307;rs33739489;rs31315479;rs31303858;rs47…
chr1_13323.1	chr1:157940145-157940394	Exon (ENSMUST00000192097.1/ENSMUST00000192097.1, exon 1 of 4)		Brinp2	3.48336	19	47.096	46.3981	51.2763	52562306	52202031	56471812	Significant in baseline	Protected effect	19	19	11	11	rs30414771	rs13483669;rs30371958;rs30414771;rs36776978;rs30899519;rs31132254;rs8275575;rs30619556;rs30352878;rs31013688;rs255053457;rs30963501;rs37555706;rs47782010;rs49416918;rs37133893;rs13483679;rs31086507;rs31161957;rs30663834;rs30511575;rs13483680;rs30419327;rs31016287;rs30771808;rs3654713;rs6192198;rs30699427;rs30611885;rs37882353;rs13483683;rs51466107;rs31045530;rs30370218;rs223675540;rs30372122;rs33…
chr1_13337.1	chr1:158247374-158247624	Intron (ENSMUST00000195271.4/240843, intron 7 of 7)		Brinp2	5.07879	1	70.499	70.3319	71.3497	155809944	155701160	159479141	Significant in baseline	No effect	21	21	10	10	rs32737955	rs31404871;rs30497461;rs32737955;rs48733621;rs31266917;rs30694289;rs3696645;rs30471675;rs3722993;rs49525822;rs6209248;rs33742737;rs33740307;rs33739489;rs31315479;rs31303858
chr1_13341.1	chr1:158252723-158252973	Intron (ENSMUST00000195271.4/240843, intron 5 of 7)		Brinp2	5.04168	1	70.4591	68.2864	70.968	155809944	152434510	158373251	Significant in baseline	No effect	21	21	10	10	rs32737955	rs31201062;rs6267646;rs31180473;rs32707440;rs31173184;rs13476184;rs231234050;rs47680477;rs37068894;rs32571301;rs262053553;rs13476187;rs32380880;rs220024233;rs32238353;rs30592448;rs6181202;rs235136764;rs31598960;rs33692139;rs31404871;rs30497461;rs32737955;rs48733621;rs31266917;rs30694289;rs3696645;rs30471675;rs3722993;rs49525822;rs6209248;rs33742737
chr1_13341.2	chr1:158252973-158253223	Intron (ENSMUST00000195271.4/240843, intron 5 of 7)		Brinp2	4.71434	1	70.968	69.4374	71.3497	158373251	154532837	159479141	Significant in baseline	Protected effect	21	21	10	10	rs33742737	rs220024233;rs32238353;rs30592448;rs6181202;rs235136764;rs31598960;rs33692139;rs31404871;rs30497461;rs32737955;rs48733621;rs31266917;rs30694289;rs3696645;rs30471675;rs3722993;rs49525822;rs6209248;rs33742737;rs33740307;rs33739489;rs31315479;rs31303858
chr1_13370.1	chr1:158405725-158405975	Intron (ENSMUST00000193042.5/11899, intron 1 of 22)		Astn1	4.85015	1	71.3497	71.2225	71.8606	159479141	158381471	162058587	Significant in baseline	No effect	19	19	12	12	rs31303858	rs33739489;rs31315479;rs31303858;rs47852191;rs3693161;rs31694619;rs6255075;rs31200652
chr1_13370.2	chr1:158405975-158406225	Intron (ENSMUST00000193042.5/11899, intron 1 of 22)		Astn1	3.41125	1	71.2225	1.499	92.8648	158381471	3010274	189361953	Significant in baseline	Protected effect	19	19	12	12	rs33739489	rs31443144;rs6269442;rs32285189;rs258367496;rs32430919;rs36251697;rs30658298;rs51852623;rs31879829;rs36742481;rs6365999;rs13470446;Affy_10344635;rs6376963;rs30847416;rs32759286;rs31625087;rs31716357;rs3677817;rs47937185;rs32140280;rs32096391;rs47493511;rs31190522;rs6298633;rs31362910;rs31878990;rs32186775;rs31868650;rs6360236;rs32740138;rs249962268_D1Mit1;rs30991578;rs32347261;rs36585555;rs304772…
chr1_13372.2	chr1:158411469-158411719	Intron (ENSMUST00000193042.5/11899, intron 1 of 22)		Astn1	3.70657	1	71.499	45.258	93.3737	160285089	82904440	191001481	Significant in baseline	Protected effect	17	17	12	12	rs3693161	rs13475954;rs32668634;rs13475957;rs32358097;rs3678377;rs30804641;rs31929413;rs219816352;rs50310397;rs32104666;rs51130709;rs13475967;rs48766014;rs6234856;rs46281379;rs47858597;rs30307999;rs13475970;rs30341693;rs30337529;rs30330393;rs50175543;rs45885174;rs52508722;rs13475979;rs13475980;rs33082518;rs32252974;rs33069894;rs32182636;rs13475984;rs30390109;rs3692309;rs3713135;rs4137444;rs32234269;rs31144…
chr1_13391.1	chr1:158547149-158547399	Intron (ENSMUST00000192868.1/ENSMUST00000192868.1, intron 1 of 3)		Astn1	3.90321	1	71.2225	66.2371	74.6753	158381471	145376780	167331141	Significant in baseline	No effect	19	19	12	12	rs33739489	rs31063456;rs31055515;rs32687429;rs32586240;rs31006935;rs31190083;rs13476163;rs30991744;rs30769516;rs3711440;rs6411476;rs3680050;rs31640585;rs13476175;rs13476177;rs31897662;rs31230953;rs31226073;rs31206241;rs31201062;rs6267646;rs31180473;rs32707440;rs31173184;rs13476184;rs231234050;rs47680477;rs37068894;rs32571301;rs262053553;rs13476187;rs32380880;rs220024233;rs32238353;rs30592448;rs6181202;rs235…
chr1_13401.2	chr1:158589000-158589250	Intron (ENSMUST00000193042.5/11899, intron 11 of 22)		Astn1	4.32369	1	71.2225	68.4137	71.6061	158381471	152914150	160285089	Significant in baseline	No effect	19	19	12	12	rs33739489	rs32707440;rs31173184;rs13476184;rs231234050;rs47680477;rs37068894;rs32571301;rs262053553;rs13476187;rs32380880;rs220024233;rs32238353;rs30592448;rs6181202;rs235136764;rs31598960;rs33692139;rs31404871;rs30497461;rs32737955;rs48733621;rs31266917;rs30694289;rs3696645;rs30471675;rs3722993;rs49525822;rs6209248;rs33742737;rs33740307;rs33739489;rs31315479;rs31303858;rs47852191;rs3693161
chr1_13401.2	chr1:158589000-158589250	Intron (ENSMUST00000193042.5/11899, intron 11 of 22)		Astn1	3.88444	19	51.658	47.0543	52.1788	57214024	52562306	57734251	Significant in baseline	No effect	20	20	11	11	rs387649318	rs30414771;rs36776978;rs30899519;rs31132254;rs8275575;rs30619556;rs30352878;rs31013688;rs255053457;rs30963501;rs37555706;rs47782010;rs49416918;rs37133893;rs13483679;rs31086507;rs31161957;rs30663834;rs30511575;rs13483680;rs30419327;rs31016287;rs30771808;rs3654713;rs6192198;rs30699427;rs30611885;rs37882353;rs13483683;rs51466107;rs31045530;rs30370218;rs223675540;rs30372122;rs33851309;rs51242251;rs30…
chr1_13427.1	chr1:159064936-159065186	Distal Intergenic		1600012P17Rik	4.12226	1	71.3497	70.3319	72.115	159479141	155701160	163312366	Significant in baseline	No effect	19	19	12	12	rs31303858	rs31404871;rs30497461;rs32737955;rs48733621;rs31266917;rs30694289;rs3696645;rs30471675;rs3722993;rs49525822;rs6209248;rs33742737;rs33740307;rs33739489;rs31315479;rs31303858;rs47852191;rs3693161;rs31694619;rs6255075;rs31200652;rs3685643;rs4222751;rs46133782;rs49476641;rs6341208;rs32045036
chr1_13447.1	chr1:159378400-159378650	Exon (ENSMUST00000194705.1/ENSMUST00000194705.1, exon 1 of 1)		Cop1	4.34954	14	48.8306	48.4489	50.4015	117841014	117038077	118537399	Significant in baseline	No effect	15	15	15	15	rs3711767	rs3671398;rs30893914;rs6286809;rs3711767;rs30438807;rs30259301;rs49879578
chr1_13452.1	chr1:159391365-159391615	Distal Intergenic		Cop1	4.09724	1	71.3497	68.4137	74.0332	159479141	152914150	166983008	Significant in baseline	Protected effect	19	19	12	12	rs31303858	rs32707440;rs31173184;rs13476184;rs231234050;rs47680477;rs37068894;rs32571301;rs262053553;rs13476187;rs32380880;rs220024233;rs32238353;rs30592448;rs6181202;rs235136764;rs31598960;rs33692139;rs31404871;rs30497461;rs32737955;rs48733621;rs31266917;rs30694289;rs3696645;rs30471675;rs3722993;rs49525822;rs6209248;rs33742737;rs33740307;rs33739489;rs31315479;rs31303858;rs47852191;rs3693161;rs31694619;rs62…
chr1_13452.2	chr1:159391615-159391865	Distal Intergenic		Cop1	3.99615	1	71.2225	69.9483	75.5962	158381471	155096387	170535283	Significant in baseline	No effect	19	19	12	12	rs33739489	rs31598960;rs33692139;rs31404871;rs30497461;rs32737955;rs48733621;rs31266917;rs30694289;rs3696645;rs30471675;rs3722993;rs49525822;rs6209248;rs33742737;rs33740307;rs33739489;rs31315479;rs31303858;rs47852191;rs3693161;rs31694619;rs6255075;rs31200652;rs3685643;rs4222751;rs46133782;rs49476641;rs6341208;rs32045036;rs31112062;rs47368358;rs32756586;rs45839990;rs252083450;rs32249444;rs51211918;rs33755574…
chr1_13453.1	chr1:159392201-159392451	Distal Intergenic		Cop1	4.38418	1	71.2225	68.1592	71.9878	158381471	151921167	163093547	Significant in baseline	No effect	19	19	12	12	rs33739489	rs31226073;rs31206241;rs31201062;rs6267646;rs31180473;rs32707440;rs31173184;rs13476184;rs231234050;rs47680477;rs37068894;rs32571301;rs262053553;rs13476187;rs32380880;rs220024233;rs32238353;rs30592448;rs6181202;rs235136764;rs31598960;rs33692139;rs31404871;rs30497461;rs32737955;rs48733621;rs31266917;rs30694289;rs3696645;rs30471675;rs3722993;rs49525822;rs6209248;rs33742737;rs33740307;rs33739489;rs31…
chr1_13456.1	chr1:159395734-159395984	Distal Intergenic		Cop1	3.91702	1	70.4591	53.6334	71.7333	155809944	106321454	161981980	Significant in baseline	No effect	21	21	10	10	rs32737955	rs30487561;rs30484039;rs47647099;rs49762567;rs3680216;rs31994637;rs31960226;rs32738873;rs31744083;rs47329570;rs31960159;rs13476045;rs45843892;rs31935680;rs3685919;rs6319405;rs3710646;rs30584583;rs51800183;rs48823920;rs30719160;rs31471077;rs30675648;rs32180662;rs30680977;rs32807094;rs30637341;rs32757674;rs32268077;rs30725178;rs30724278;rs30698282;rs3723088;rs3663708;rs31007558;rs30727085;rs4801580…
chr1_13459.2	chr1:159398669-159398919	Distal Intergenic		Cop1	3.95632	19	48.2092	47.0543	51.658	53706694	52562306	57214024	Significant in baseline	No effect	22	22	9	9	rs30963501	rs30414771;rs36776978;rs30899519;rs31132254;rs8275575;rs30619556;rs30352878;rs31013688;rs255053457;rs30963501;rs37555706;rs47782010;rs49416918;rs37133893;rs13483679;rs31086507;rs31161957;rs30663834;rs30511575;rs13483680;rs30419327;rs31016287;rs30771808;rs3654713;rs6192198;rs30699427;rs30611885;rs37882353;rs13483683;rs51466107;rs31045530;rs30370218;rs223675540;rs30372122;rs33851309;rs51242251;rs30…
chr1_13459.4	chr1:159399169-159399419	Distal Intergenic		Cop1	3.54335	1	3.28805	1.499	94.4034	5119671	3010274	191969842	Significant in baseline	No effect	18	18	13	13	rs31625087	rs31443144;rs6269442;rs32285189;rs258367496;rs32430919;rs36251697;rs30658298;rs51852623;rs31879829;rs36742481;rs6365999;rs13470446;Affy_10344635;rs6376963;rs30847416;rs32759286;rs31625087;rs31716357;rs3677817;rs47937185;rs32140280;rs32096391;rs47493511;rs31190522;rs6298633;rs31362910;rs31878990;rs32186775;rs31868650;rs6360236;rs32740138;rs249962268_D1Mit1;rs30991578;rs32347261;rs36585555;rs304772…
chr1_13467.4	chr1:159424212-159424462	Distal Intergenic		Cop1	4.40816	1	71.2225	69.821	74.2877	158381471	154609113	167223113	Significant in baseline	Protected effect	19	19	12	12	rs33739489	rs6181202;rs235136764;rs31598960;rs33692139;rs31404871;rs30497461;rs32737955;rs48733621;rs31266917;rs30694289;rs3696645;rs30471675;rs3722993;rs49525822;rs6209248;rs33742737;rs33740307;rs33739489;rs31315479;rs31303858;rs47852191;rs3693161;rs31694619;rs6255075;rs31200652;rs3685643;rs4222751;rs46133782;rs49476641;rs6341208;rs32045036;rs31112062;rs47368358;rs32756586;rs45839990;rs252083450;rs32249444…
chr1_13471.1	chr1:159510730-159510980	Distal Intergenic		Tnr	3.54297	1	70.968	68.2864	71.6061	158373251	152434510	160285089	Significant in baseline	No effect	21	21	10	10	rs33742737	rs31201062;rs6267646;rs31180473;rs32707440;rs31173184;rs13476184;rs231234050;rs47680477;rs37068894;rs32571301;rs262053553;rs13476187;rs32380880;rs220024233;rs32238353;rs30592448;rs6181202;rs235136764;rs31598960;rs33692139;rs31404871;rs30497461;rs32737955;rs48733621;rs31266917;rs30694289;rs3696645;rs30471675;rs3722993;rs49525822;rs6209248;rs33742737;rs33740307;rs33739489;rs31315479;rs31303858;rs47…
chr1_13476.3	chr1:159537599-159537849	Intron (ENSMUST00000192069.5/21960, intron 1 of 22)		Tnr	5.74886	1	71.2225	70.0755	71.7333	158381471	155104914	161981980	Significant in baseline	Protected effect	19	19	12	12	rs33739489	rs33692139;rs31404871;rs30497461;rs32737955;rs48733621;rs31266917;rs30694289;rs3696645;rs30471675;rs3722993;rs49525822;rs6209248;rs33742737;rs33740307;rs33739489;rs31315479;rs31303858;rs47852191;rs3693161;rs31694619;rs6255075
chr1_13480.2	chr1:159567478-159567728	Intron (ENSMUST00000192069.5/21960, intron 1 of 22)		Tnr	4.07612	1	9.93723	8.02296	10.8479	22104600	18168753	23145049	Significant in baseline	Protected effect	14	14	17	17	rs46249537	rs32043384;rs219716413;rs13475747;rs51820747;rs51700370;rs52118613;rs31772262;rs3670611;rs224386739;rs36660068;rs6404446;rs32101154;rs6253968;rs32315565;rs31766107;rs46856073;rs46249537;rs31949292;rs30499557;rs6316488
chr1_13489.3	chr1:159588719-159588969	Intron (ENSMUST00000192069.5/21960, intron 1 of 22)		Tnr	5.93509	1	71.3497	70.968	71.9878	159479141	158373251	163093547	Significant in baseline	No effect	19	19	12	12	rs31303858	rs33742737;rs33740307;rs33739489;rs31315479;rs31303858;rs47852191;rs3693161;rs31694619;rs6255075;rs31200652;rs3685643;rs4222751;rs46133782;rs49476641
chr1_13489.4	chr1:159588969-159589219	Intron (ENSMUST00000192069.5/21960, intron 1 of 22)		Tnr	6.64027	1	71.3497	71.2225	71.7333	159479141	158381471	161981980	Significant in baseline	No effect	19	19	12	12	rs31303858	rs33739489;rs31315479;rs31303858;rs47852191;rs3693161;rs31694619;rs6255075
chr1_13520.1	chr1:159716915-159717165	Intron (ENSMUST00000192069.5/21960, intron 1 of 22)		Tnr	4.85493	1	71.2225	70.3319	71.6061	158381471	155701160	160285089	Significant in baseline	No effect	19	19	12	12	rs33739489	rs31404871;rs30497461;rs32737955;rs48733621;rs31266917;rs30694289;rs3696645;rs30471675;rs3722993;rs49525822;rs6209248;rs33742737;rs33740307;rs33739489;rs31315479;rs31303858;rs47852191;rs3693161
chr1_13520.1	chr1:159716915-159717165	Intron (ENSMUST00000192069.5/21960, intron 1 of 22)		Tnr	3.90171	19	49.869	47.9527	51.658	55341476	53385881	57214024	Significant in baseline	No effect	20	20	11	11	rs30611885	rs31013688;rs255053457;rs30963501;rs37555706;rs47782010;rs49416918;rs37133893;rs13483679;rs31086507;rs31161957;rs30663834;rs30511575;rs13483680;rs30419327;rs31016287;rs30771808;rs3654713;rs6192198;rs30699427;rs30611885;rs37882353;rs13483683;rs51466107;rs31045530;rs30370218;rs223675540;rs30372122;rs33851309;rs51242251;rs30368862;rs252546362;rs6355398;rs30851692;rs50117046;rs30800443;rs3023497;rs31…
chr1_13522.1	chr1:159723797-159724047	Intron (ENSMUST00000192069.5/21960, intron 1 of 22)		Tnr	6.06342	1	71.3497	71.2225	71.6061	159479141	158381471	160285089	Significant in baseline	No effect	19	19	12	12	rs31303858	rs33739489;rs31315479;rs31303858;rs47852191;rs3693161
chr1_13526.2	chr1:159761080-159761330	Intron (ENSMUST00000192069.5/21960, intron 2 of 22)		Tnr	3.84784	7	37.473	37.3458	42.8744	71410581	70848220	82161769	Significant in baseline	No effect	20	20	11	11	rs47119834	rs31037523;rs37007295;rs47119834;rs31882027;rs13479326;rs31453122;rs32299443;rs31064232;rs46054811;rs31783952;rs227095692;rs31342575;rs31623161;rs31597771;rs31246895;rs13479334;UNC070318260;rs3691951;rs31985217;rs49704812;rs32052013;rs31223769;rs16793804;rs8268441;rs36604679;rs49388131;rs31807959;rs32310436;rs48673245;rs13479342;rs31904664;rs32320379;rs37128329;rs36796772;rs13479357;rs30658482;rs…
chr1_13538.4	chr1:159815124-159815374	Intron (ENSMUST00000192069.5/21960, intron 2 of 22)		Tnr	3.45863	5	22.4072	18.6114	71.5562	41945350	38527166	133911105	Significant in baseline	No effect	13	13	18	18	rs36342906	rs33192205;rs47842264;rs32726275;rs32719630;UNC050087440;rs3703261;rs32713546;rs32709662;rs33680482;rs33621531;rs46239221;rs33508711;rs32750860;rs13478205;rs3662682;rs37891112;rs36908363;rs36342906;rs33715848;rs3716195;rs36400737;rs33647749;rs49954084;rs13478212;rs3023596;rs33122544;rs51523318;rs29558712;rs29523582;rs253899322;rs29781043;rs6294022;rs47779875;D5Mit79;rs33640394;rs29545782;rs297293…
chr1_13551.1	chr1:159879785-159880035	Intron (ENSMUST00000192069.5/21960, intron 9 of 22)		Tnr	3.94421	1	71.2225	65.3037	74.1605	158381471	145201671	167194662	Significant in baseline	Protected effect	19	19	12	12	rs33739489	rs31066093;rs31063456;rs31055515;rs32687429;rs32586240;rs31006935;rs31190083;rs13476163;rs30991744;rs30769516;rs3711440;rs6411476;rs3680050;rs31640585;rs13476175;rs13476177;rs31897662;rs31230953;rs31226073;rs31206241;rs31201062;rs6267646;rs31180473;rs32707440;rs31173184;rs13476184;rs231234050;rs47680477;rs37068894;rs32571301;rs262053553;rs13476187;rs32380880;rs220024233;rs32238353;rs30592448;rs61…
chr1_13551.1	chr1:159879785-159880035	Intron (ENSMUST00000192069.5/21960, intron 9 of 22)		Tnr	3.94359	19	49.869	47.0543	51.658	55341476	52562306	57214024	Significant in baseline	Protected effect	20	20	11	11	rs30611885	rs30414771;rs36776978;rs30899519;rs31132254;rs8275575;rs30619556;rs30352878;rs31013688;rs255053457;rs30963501;rs37555706;rs47782010;rs49416918;rs37133893;rs13483679;rs31086507;rs31161957;rs30663834;rs30511575;rs13483680;rs30419327;rs31016287;rs30771808;rs3654713;rs6192198;rs30699427;rs30611885;rs37882353;rs13483683;rs51466107;rs31045530;rs30370218;rs223675540;rs30372122;rs33851309;rs51242251;rs30…
chr1_13551.2	chr1:159880035-159880285	Intron (ENSMUST00000192069.5/21960, intron 9 of 22)		Tnr	4.35525	1	71.3497	68.1592	71.9878	159479141	151921167	163093547	Significant in baseline	Up effect	19	19	12	12	rs31303858	rs31226073;rs31206241;rs31201062;rs6267646;rs31180473;rs32707440;rs31173184;rs13476184;rs231234050;rs47680477;rs37068894;rs32571301;rs262053553;rs13476187;rs32380880;rs220024233;rs32238353;rs30592448;rs6181202;rs235136764;rs31598960;rs33692139;rs31404871;rs30497461;rs32737955;rs48733621;rs31266917;rs30694289;rs3696645;rs30471675;rs3722993;rs49525822;rs6209248;rs33742737;rs33740307;rs33739489;rs31…
chr1_13571.2	chr1:160079383-160079633	Promoter (1-2kb)	dELS,CTCF-bound	4930562F07Rik	4.00448	9	27.309	25.7625	30.5176	62256039	57350996	66773285	Significant in baseline	No effect	16	16	15	15	rs50446584	rs29980591;rs33645823;rs4227700;rs29694477;rs6224703;rs29918402;rs29592407;rs30077376;rs37780731;rs36614144;rs29980520;rs50446584;rs52505961;rs36686544;rs30383735;rs4227706;rs48071644;rs30174981;rs29691309;rs29749431;rs29942478;rs32845998;rs29840677;rs30523270;rs32849123;rs29649497;rs32862226;rs30428333;rs30189660;rs30182716;rs29895064;rs45684777;rs32892671;rs32892673;rs30269010;rs47818381;rs2982…
chr1_13575.1	chr1:160100972-160101222	Intron (ENSMUST00000039178.11/329278, intron 18 of 21)	dELS	4930562F07Rik	4.2213	1	71.3497	69.9483	71.8606	159479141	155096387	162058587	Significant in baseline	No effect	19	19	12	12	rs31303858	rs31598960;rs33692139;rs31404871;rs30497461;rs32737955;rs48733621;rs31266917;rs30694289;rs3696645;rs30471675;rs3722993;rs49525822;rs6209248;rs33742737;rs33740307;rs33739489;rs31315479;rs31303858;rs47852191;rs3693161;rs31694619;rs6255075;rs31200652
chr1_13575.2	chr1:160101222-160101472	Intron (ENSMUST00000039178.11/329278, intron 18 of 21)	dELS	4930562F07Rik	5.26338	1	71.3497	70.3319	71.7333	159479141	155701160	161981980	Significant in baseline	No effect	19	19	12	12	rs31303858	rs31404871;rs30497461;rs32737955;rs48733621;rs31266917;rs30694289;rs3696645;rs30471675;rs3722993;rs49525822;rs6209248;rs33742737;rs33740307;rs33739489;rs31315479;rs31303858;rs47852191;rs3693161;rs31694619;rs6255075
chr1_13583.1	chr1:160184472-160184722	Distal Intergenic	CTCF-only,CTCF-bound	Mrps14	4.56961	1	71.3497	69.9483	71.7333	159479141	155096387	161981980	Significant in baseline	No effect	19	19	12	12	rs31303858	rs31598960;rs33692139;rs31404871;rs30497461;rs32737955;rs48733621;rs31266917;rs30694289;rs3696645;rs30471675;rs3722993;rs49525822;rs6209248;rs33742737;rs33740307;rs33739489;rs31315479;rs31303858;rs47852191;rs3693161;rs31694619;rs6255075
chr1_13596.3	chr1:160250853-160251103	Promoter (<=1kb)		Rabgap1l	4.04567	7	44.9418	44.6854	46.628	84184551	84149847	89603538	Significant in baseline	Protected effect	15	15	16	16	rs32066094	rs31476858;rs32066094;rs6278282;rs31521374;rs37626662;rs31488447;rs32267337;rs6394492;rs32174327;rs31133462;rs31178835;rs32409257;rs32326663;rs31182975;rs31345154
chr1_13596.3	chr1:160250853-160251103	Promoter (<=1kb)		Rabgap1l	3.98944	7	52.659	49.8404	53.0427	107293974	97692111	107372020	Significant in baseline	Protected effect	17	17	14	14	rs50275558	rs31395168;UNC070814219;rs31636432;rs8281437;rs32240657;rs108409665;rs32184354;rs32024762;rs48975428;rs260604888;rs31765528;rs32433796;rs31811139;rs31794102;rs13479440;rs13479441;rs31920772;rs46331406;rs31799039;rs51978362;rs13479447;rs31153090;rs45761847;rs32502119;rs50275558;rs6207462;rs13479451;rs32240406
chr1_13647.1	chr1:160863085-160863335	Distal Intergenic	CTCF-only,CTCF-bound	Rc3h1	5.32661	1	71.7333	71.0952	75.5962	161981980	158380674	170535283	Significant in baseline	No effect	17	17	14	14	rs6255075	rs33740307;rs33739489;rs31315479;rs31303858;rs47852191;rs3693161;rs31694619;rs6255075;rs31200652;rs3685643;rs4222751;rs46133782;rs49476641;rs6341208;rs32045036;rs31112062;rs47368358;rs32756586;rs45839990;rs252083450;rs32249444;rs51211918;rs33755574;rs31837891;rs32390142;rs252005115;rs30710796;rs31428291;rs50916411;rs31286471;rs38443544;rs36664522;rs37545577;rs38346127;rs13476221;rs48965551;rs4222…
chr1_13685.1	chr1:161219835-161220085	Intron (ENSMUST00000193379.1/ENSMUST00000193379.1, intron 18 of 25)		Prdx6	5.07787	1	71.499	71.0952	71.9878	160285089	158380674	163093547	Significant in baseline	Protected effect	17	17	12	12	rs3693161	rs33740307;rs33739489;rs31315479;rs31303858;rs47852191;rs3693161;rs31694619;rs6255075;rs31200652;rs3685643;rs4222751;rs46133782;rs49476641
chr1_1370.2	chr1:30819477-30819727	Intron (ENSMUST00000186733.6/213109, intron 8 of 15)		Phf3	4.58128	1	14.499	14.0905	17.084	27306300	25700998	32343834	Significant in baseline	No effect	16	16	14	14	rs223334166	rs32249228;rs32331653;rs32086436;rs48222526;rs223334166;rs31670161;rs31134323;rs47868189;rs31600419;rs30514876;rs32110348;rs31590459;rs32372810;rs32684509;rs230225148;rs48664698;rs32760971;rs31818207;rs30598074
chr1_13704.1	chr1:161575218-161575468	Distal Intergenic		Tnfsf18	3.92275	7	39.4176	37.3458	40.5705	73340513	70848220	74340806	Significant in baseline	Up effect	18	18	13	13	rs13479334	rs31037523;rs37007295;rs47119834;rs31882027;rs13479326;rs31453122;rs32299443;rs31064232;rs46054811;rs31783952;rs227095692;rs31342575;rs31623161;rs31597771;rs31246895;rs13479334;UNC070318260;rs3691951;rs31985217;rs49704812;rs32052013;rs31223769;rs16793804;rs8268441;rs36604679;rs49388131
chr1_13708.1	chr1:161663369-161663619	Distal Intergenic		Fasl	6.07159	1	71.6061	71.2225	71.7333	160285089	158381471	161981980	Significant in baseline	No effect	17	17	14	14	rs3693161	rs33739489;rs31315479;rs31303858;rs47852191;rs3693161;rs31694619;rs6255075
chr1_13715.2	chr1:161788338-161788588	Promoter (<=1kb)	dELS	Fasl	4.04767	1	71.7333	69.4374	75.5962	161981980	154532837	170535283	Significant in baseline	No effect	17	17	14	14	rs6255075	rs220024233;rs32238353;rs30592448;rs6181202;rs235136764;rs31598960;rs33692139;rs31404871;rs30497461;rs32737955;rs48733621;rs31266917;rs30694289;rs3696645;rs30471675;rs3722993;rs49525822;rs6209248;rs33742737;rs33740307;rs33739489;rs31315479;rs31303858;rs47852191;rs3693161;rs31694619;rs6255075;rs31200652;rs3685643;rs4222751;rs46133782;rs49476641;rs6341208;rs32045036;rs31112062;rs47368358;rs32756586…
chr1_13732.2	chr1:162077663-162077913	Intron (ENSMUST00000159763.7/103967, intron 5 of 8)	dELS,CTCF-bound	Dnm3	4.68505	1	71.8606	71.2225	73.3971	162058587	158381471	164902237	Significant in baseline	Protected effect	18	18	13	13	rs31200652	rs33739489;rs31315479;rs31303858;rs47852191;rs3693161;rs31694619;rs6255075;rs31200652;rs3685643;rs4222751;rs46133782;rs49476641;rs6341208;rs32045036;rs31112062;rs47368358;rs32756586;rs45839990;rs252083450;rs32249444;rs51211918;rs33755574;rs31837891;rs32390142;rs252005115
chr1_13736.1	chr1:162108131-162108381	Intron (ENSMUST00000159763.7/103967, intron 4 of 8)	dELS,CTCF-bound	Dnm3	5.43711	1	71.8606	71.2225	71.9878	162058587	158381471	163093547	Significant in baseline	Down effect	18	18	13	13	rs31200652	rs33739489;rs31315479;rs31303858;rs47852191;rs3693161;rs31694619;rs6255075;rs31200652;rs3685643;rs4222751;rs46133782;rs49476641
chr1_13736.2	chr1:162108381-162108631	Intron (ENSMUST00000159763.7/103967, intron 4 of 8)	dELS,CTCF-bound	Dnm3	4.45199	1	71.8606	69.9483	72.115	162058587	155096387	163312366	Significant in baseline	Protected effect	18	18	13	13	rs31200652	rs31598960;rs33692139;rs31404871;rs30497461;rs32737955;rs48733621;rs31266917;rs30694289;rs3696645;rs30471675;rs3722993;rs49525822;rs6209248;rs33742737;rs33740307;rs33739489;rs31315479;rs31303858;rs47852191;rs3693161;rs31694619;rs6255075;rs31200652;rs3685643;rs4222751;rs46133782;rs49476641;rs6341208;rs32045036
chr1_13739.2	chr1:162163358-162163608	Intron (ENSMUST00000159763.7/103967, intron 3 of 8)		Dnm3	5.04249	1	71.8606	71.3497	74.0332	162058587	159479141	166983008	Significant in baseline	No effect	18	18	13	13	rs31200652	rs31303858;rs47852191;rs3693161;rs31694619;rs6255075;rs31200652;rs3685643;rs4222751;rs46133782;rs49476641;rs6341208;rs32045036;rs31112062;rs47368358;rs32756586;rs45839990;rs252083450;rs32249444;rs51211918;rs33755574;rs31837891;rs32390142;rs252005115;rs30710796;rs31428291;rs50916411;rs31286471;rs38443544;rs36664522;rs37545577;rs38346127;rs13476221
chr1_13739.3	chr1:162163608-162163858	Intron (ENSMUST00000159763.7/103967, intron 3 of 8)		Dnm3	4.49504	1	71.9878	68.4137	75.5962	163093547	152914150	170535283	Significant in baseline	No effect	18	18	13	13	rs49476641	rs32707440;rs31173184;rs13476184;rs231234050;rs47680477;rs37068894;rs32571301;rs262053553;rs13476187;rs32380880;rs220024233;rs32238353;rs30592448;rs6181202;rs235136764;rs31598960;rs33692139;rs31404871;rs30497461;rs32737955;rs48733621;rs31266917;rs30694289;rs3696645;rs30471675;rs3722993;rs49525822;rs6209248;rs33742737;rs33740307;rs33739489;rs31315479;rs31303858;rs47852191;rs3693161;rs31694619;rs62…
chr1_13739.4	chr1:162163858-162164108	Intron (ENSMUST00000159763.7/103967, intron 3 of 8)		Dnm3	4.05044	1	71.9878	68.2864	75.5962	163093547	152434510	170535283	Significant in baseline	No effect	18	18	13	13	rs49476641	rs31201062;rs6267646;rs31180473;rs32707440;rs31173184;rs13476184;rs231234050;rs47680477;rs37068894;rs32571301;rs262053553;rs13476187;rs32380880;rs220024233;rs32238353;rs30592448;rs6181202;rs235136764;rs31598960;rs33692139;rs31404871;rs30497461;rs32737955;rs48733621;rs31266917;rs30694289;rs3696645;rs30471675;rs3722993;rs49525822;rs6209248;rs33742737;rs33740307;rs33739489;rs31315479;rs31303858;rs47…
chr1_13739.5	chr1:162164108-162164358	Intron (ENSMUST00000159763.7/103967, intron 3 of 8)	dELS	Dnm3	4.40675	1	71.9878	69.9483	74.8025	163093547	155096387	167823479	Significant in baseline	No effect	18	18	13	13	rs49476641	rs31598960;rs33692139;rs31404871;rs30497461;rs32737955;rs48733621;rs31266917;rs30694289;rs3696645;rs30471675;rs3722993;rs49525822;rs6209248;rs33742737;rs33740307;rs33739489;rs31315479;rs31303858;rs47852191;rs3693161;rs31694619;rs6255075;rs31200652;rs3685643;rs4222751;rs46133782;rs49476641;rs6341208;rs32045036;rs31112062;rs47368358;rs32756586;rs45839990;rs252083450;rs32249444;rs51211918;rs33755574…
chr1_13758.1	chr1:162356403-162356653	Intron (ENSMUST00000086074.11/103967, intron 2 of 20)	dELS	Dnm3	3.97133	1	71.7333	69.9483	74.1605	161981980	155096387	167194662	Significant in baseline	No effect	17	17	14	14	rs6255075	rs31598960;rs33692139;rs31404871;rs30497461;rs32737955;rs48733621;rs31266917;rs30694289;rs3696645;rs30471675;rs3722993;rs49525822;rs6209248;rs33742737;rs33740307;rs33739489;rs31315479;rs31303858;rs47852191;rs3693161;rs31694619;rs6255075;rs31200652;rs3685643;rs4222751;rs46133782;rs49476641;rs6341208;rs32045036;rs31112062;rs47368358;rs32756586;rs45839990;rs252083450;rs32249444;rs51211918;rs33755574…
chr1_13758.2	chr1:162356653-162356903	Intron (ENSMUST00000086074.11/103967, intron 2 of 20)	dELS	Dnm3	4.41214	1	71.499	69.9483	72.115	160285089	155096387	163312366	Significant in baseline	No effect	17	17	12	12	rs3693161	rs31598960;rs33692139;rs31404871;rs30497461;rs32737955;rs48733621;rs31266917;rs30694289;rs3696645;rs30471675;rs3722993;rs49525822;rs6209248;rs33742737;rs33740307;rs33739489;rs31315479;rs31303858;rs47852191;rs3693161;rs31694619;rs6255075;rs31200652;rs3685643;rs4222751;rs46133782;rs49476641;rs6341208;rs32045036
chr1_13760.4	chr1:162359278-162359528	Intron (ENSMUST00000086074.11/103967, intron 2 of 20)	dELS,CTCF-bound	Dnm3	8.36093	1	71.8606	71.6061	71.9878	162058587	160285089	163093547	Significant in baseline	Protected effect	18	18	13	13	rs31200652	rs3693161;rs31694619;rs6255075;rs31200652;rs3685643;rs4222751;rs46133782;rs49476641
chr1_13772.1	chr1:162476646-162476896	Promoter (1-2kb)		Dnm3	3.88671	8	40.4466	38.6476	42.5325	100208018	95762383	106636687	Significant in baseline	No effect	13	13	18	18	rs49833803	rs32818171;rs33490412;rs3661882;rs32579649;rs38578518;rs33065931;rs32809239;rs33017697;rs6377892;rs33453782;rs3660197;rs50407843;rs3712818;rs49833803;rs3683922;rs47064165;rs32420724;rs48756956;rs30757772;rs30771728;rs13479958;rs46061215;rs33015720;rs33004646
chr1_13772.2	chr1:162476896-162477146	Promoter (<=1kb)		Dnm3	5.66932	1	71.9878	71.3497	74.1605	163093547	159479141	167194662	Significant in baseline	No effect	18	18	13	13	rs49476641	rs31303858;rs47852191;rs3693161;rs31694619;rs6255075;rs31200652;rs3685643;rs4222751;rs46133782;rs49476641;rs6341208;rs32045036;rs31112062;rs47368358;rs32756586;rs45839990;rs252083450;rs32249444;rs51211918;rs33755574;rs31837891;rs32390142;rs252005115;rs30710796;rs31428291;rs50916411;rs31286471;rs38443544;rs36664522;rs37545577;rs38346127;rs13476221;rs48965551
chr1_13777.1	chr1:162509252-162509502	Distal Intergenic	dELS	Dnm3	3.49899	1	71.8606	68.2864	76.6714	162058587	152434510	170949421	Significant in baseline	No effect	18	18	13	13	rs31200652	rs31201062;rs6267646;rs31180473;rs32707440;rs31173184;rs13476184;rs231234050;rs47680477;rs37068894;rs32571301;rs262053553;rs13476187;rs32380880;rs220024233;rs32238353;rs30592448;rs6181202;rs235136764;rs31598960;rs33692139;rs31404871;rs30497461;rs32737955;rs48733621;rs31266917;rs30694289;rs3696645;rs30471675;rs3722993;rs49525822;rs6209248;rs33742737;rs33740307;rs33739489;rs31315479;rs31303858;rs47…
chr1_13777.2	chr1:162509502-162509752	Distal Intergenic	dELS	Dnm3	3.78978	1	71.9878	1.499	76.6714	163093547	3010274	170949421	Significant in baseline	Protected effect	18	18	13	13	rs49476641	rs31443144;rs6269442;rs32285189;rs258367496;rs32430919;rs36251697;rs30658298;rs51852623;rs31879829;rs36742481;rs6365999;rs13470446;Affy_10344635;rs6376963;rs30847416;rs32759286;rs31625087;rs31716357;rs3677817;rs47937185;rs32140280;rs32096391;rs47493511;rs31190522;rs6298633;rs31362910;rs31878990;rs32186775;rs31868650;rs6360236;rs32740138;rs249962268_D1Mit1;rs30991578;rs32347261;rs36585555;rs304772…
chr1_13796.2	chr1:162665251-162665501	Distal Intergenic	DNase-H3K4me3,CTCF-bound	Myocos	4.60411	1	71.8606	69.9483	74.0332	162058587	155096387	166983008	Significant in baseline	No effect	18	18	13	13	rs31200652	rs31598960;rs33692139;rs31404871;rs30497461;rs32737955;rs48733621;rs31266917;rs30694289;rs3696645;rs30471675;rs3722993;rs49525822;rs6209248;rs33742737;rs33740307;rs33739489;rs31315479;rs31303858;rs47852191;rs3693161;rs31694619;rs6255075;rs31200652;rs3685643;rs4222751;rs46133782;rs49476641;rs6341208;rs32045036;rs31112062;rs47368358;rs32756586;rs45839990;rs252083450;rs32249444;rs51211918;rs33755574…
chr1_13812.1	chr1:162858743-162858993	Promoter (<=1kb)	dELS	Fmo1	4.39514	1	71.8606	68.2864	75.5962	162058587	152434510	170535283	Significant in baseline	No effect	18	18	13	13	rs31200652	rs31201062;rs6267646;rs31180473;rs32707440;rs31173184;rs13476184;rs231234050;rs47680477;rs37068894;rs32571301;rs262053553;rs13476187;rs32380880;rs220024233;rs32238353;rs30592448;rs6181202;rs235136764;rs31598960;rs33692139;rs31404871;rs30497461;rs32737955;rs48733621;rs31266917;rs30694289;rs3696645;rs30471675;rs3722993;rs49525822;rs6209248;rs33742737;rs33740307;rs33739489;rs31315479;rs31303858;rs47…
chr1_13837.1	chr1:163393904-163394154	Intron (ENSMUST00000045138.5/98376, intron 3 of 4)		Gorab	5.49304	1	74.0332	72.5026	74.6753	166983008	163338902	167331141	Significant in baseline	No effect	15	15	16	16	rs13476221	rs31112062;rs47368358;rs32756586;rs45839990;rs252083450;rs32249444;rs51211918;rs33755574;rs31837891;rs32390142;rs252005115;rs30710796;rs31428291;rs50916411;rs31286471;rs38443544;rs36664522;rs37545577;rs38346127;rs13476221;rs48965551;rs4222799;rs30563210
chr1_13837.2	chr1:163394154-163394404	Intron (ENSMUST00000045138.5/98376, intron 3 of 4)		Gorab	5.17794	1	74.0332	72.5026	75.5962	166983008	163338902	170535283	Significant in baseline	No effect	15	15	16	16	rs13476221	rs31112062;rs47368358;rs32756586;rs45839990;rs252083450;rs32249444;rs51211918;rs33755574;rs31837891;rs32390142;rs252005115;rs30710796;rs31428291;rs50916411;rs31286471;rs38443544;rs36664522;rs37545577;rs38346127;rs13476221;rs48965551;rs4222799;rs30563210;rs32238450;rs48267649;rs50209411;rs48742671
chr1_13840.1	chr1:163494823-163495073	Distal Intergenic		Gorab	5.42982	1	74.1605	72.5026	74.8025	167194662	163338902	167823479	Significant in baseline	No effect	16	16	15	15	rs48965551	rs31112062;rs47368358;rs32756586;rs45839990;rs252083450;rs32249444;rs51211918;rs33755574;rs31837891;rs32390142;rs252005115;rs30710796;rs31428291;rs50916411;rs31286471;rs38443544;rs36664522;rs37545577;rs38346127;rs13476221;rs48965551;rs4222799;rs30563210;rs32238450;rs48267649
chr1_13887.2	chr1:164247855-164248105	Promoter (<=1kb)	dELS	Slc19a2	8.42409	1	72.5026	72.5026	74.0332	163338902	163338902	166983008	Significant in baseline	No effect	15	15	16	16	rs31112062	rs31112062;rs47368358;rs32756586;rs45839990;rs252083450;rs32249444;rs51211918;rs33755574;rs31837891;rs32390142;rs252005115;rs30710796;rs31428291;rs50916411;rs31286471;rs38443544;rs36664522;rs37545577;rs38346127;rs13476221
chr1_13891.1	chr1:164261457-164261707	Promoter (<=1kb)		Slc19a2	4.10725	1	74.1605	72.115	74.8025	167194662	163312366	167823479	Significant in baseline	No effect	16	16	15	15	rs48965551	rs32045036;rs31112062;rs47368358;rs32756586;rs45839990;rs252083450;rs32249444;rs51211918;rs33755574;rs31837891;rs32390142;rs252005115;rs30710796;rs31428291;rs50916411;rs31286471;rs38443544;rs36664522;rs37545577;rs38346127;rs13476221;rs48965551;rs4222799;rs30563210;rs32238450;rs48267649
chr1_13891.2	chr1:164261707-164261957	Promoter (<=1kb)		Slc19a2	4.82574	1	74.0332	72.5026	74.0332	166983008	163338902	166983008	Significant in baseline	No effect	15	15	16	16	rs13476221	rs31112062;rs47368358;rs32756586;rs45839990;rs252083450;rs32249444;rs51211918;rs33755574;rs31837891;rs32390142;rs252005115;rs30710796;rs31428291;rs50916411;rs31286471;rs38443544;rs36664522;rs37545577;rs38346127;rs13476221
chr1_13900.2	chr1:164317402-164317652	Intron (ENSMUST00000195474.5/171567, intron 2 of 8)		Nme7	4.39605	1	74.0332	72.5026	74.1605	166983008	163338902	167194662	Significant in baseline	No effect	15	15	16	16	rs13476221	rs31112062;rs47368358;rs32756586;rs45839990;rs252083450;rs32249444;rs51211918;rs33755574;rs31837891;rs32390142;rs252005115;rs30710796;rs31428291;rs50916411;rs31286471;rs38443544;rs36664522;rs37545577;rs38346127;rs13476221;rs48965551
chr1_13900.3	chr1:164317652-164317902	Intron (ENSMUST00000195474.5/171567, intron 2 of 8)		Nme7	4.18395	1	72.5026	68.2864	75.5962	163338902	152434510	170535283	Significant in baseline	No effect	15	15	16	16	rs31112062	rs31201062;rs6267646;rs31180473;rs32707440;rs31173184;rs13476184;rs231234050;rs47680477;rs37068894;rs32571301;rs262053553;rs13476187;rs32380880;rs220024233;rs32238353;rs30592448;rs6181202;rs235136764;rs31598960;rs33692139;rs31404871;rs30497461;rs32737955;rs48733621;rs31266917;rs30694289;rs3696645;rs30471675;rs3722993;rs49525822;rs6209248;rs33742737;rs33740307;rs33739489;rs31315479;rs31303858;rs47…
chr1_13906.4	chr1:164330864-164331114	Intron (ENSMUST00000193808.5/171567, intron 5 of 15)		Nme7	8.43679	1	73.1407	72.5026	74.0332	164858900	163338902	166983008	Significant in baseline	Protected effect	15	15	16	16	rs31837891	rs31112062;rs47368358;rs32756586;rs45839990;rs252083450;rs32249444;rs51211918;rs33755574;rs31837891;rs32390142;rs252005115;rs30710796;rs31428291;rs50916411;rs31286471;rs38443544;rs36664522;rs37545577;rs38346127;rs13476221
chr1_13908.1	chr1:164335843-164336093	Intron (ENSMUST00000193808.5/171567, intron 6 of 15)		Nme7	4.43853	1	74.499	72.5026	75.5962	167331141	163338902	170535283	Significant in baseline	No effect	17	17	13	13	rs30563210	rs31112062;rs47368358;rs32756586;rs45839990;rs252083450;rs32249444;rs51211918;rs33755574;rs31837891;rs32390142;rs252005115;rs30710796;rs31428291;rs50916411;rs31286471;rs38443544;rs36664522;rs37545577;rs38346127;rs13476221;rs48965551;rs4222799;rs30563210;rs32238450;rs48267649;rs50209411;rs48742671
chr1_13908.2	chr1:164336093-164336343	Intron (ENSMUST00000193808.5/171567, intron 6 of 15)		Nme7	5.39282	1	74.2877	72.5026	75.5962	167223113	163338902	170535283	Significant in baseline	No effect	17	17	14	14	rs4222799	rs31112062;rs47368358;rs32756586;rs45839990;rs252083450;rs32249444;rs51211918;rs33755574;rs31837891;rs32390142;rs252005115;rs30710796;rs31428291;rs50916411;rs31286471;rs38443544;rs36664522;rs37545577;rs38346127;rs13476221;rs48965551;rs4222799;rs30563210;rs32238450;rs48267649;rs50209411;rs48742671
chr1_13946.2	chr1:164548100-164548350	Distal Intergenic		Gm26685	3.9451	11	55.803	53.4151	59.0497	100412031	96683859	103177521	No baseline effect	No effect	9	9	22	22	rs27072810	rs27052851;rs47508103;rs27086489;rs29435192;rs29445436;rs27026080;rs27026004;D11Mit99;rs13481185;rs27058443;rs29442012;rs27072810;rs3154925;rs3154428;rs47248855;rs29422564;rs27057342;rs29431671;rs13481194;rs48815028;UNC110164426;rs29454846;rs29453966;rs13481196;rs29466020;rs3709793;rs29410236;rs13481201
chr1_14003.3	chr1:165063130-165063380	Distal Intergenic	pELS	4930568G15Rik	3.96534	1	74.499	72.759	74.8025	167331141	164065311	167823479	Significant in baseline	No effect	17	17	13	13	rs30563210	rs32756586;rs45839990;rs252083450;rs32249444;rs51211918;rs33755574;rs31837891;rs32390142;rs252005115;rs30710796;rs31428291;rs50916411;rs31286471;rs38443544;rs36664522;rs37545577;rs38346127;rs13476221;rs48965551;rs4222799;rs30563210;rs32238450;rs48267649
chr1_14019.8	chr1:165120781-165121031	Distal Intergenic		Tbx19	4.41866	1	74.1605	72.115	74.6753	167194662	163312366	167331141	Significant in baseline	No effect	16	16	15	15	rs48965551	rs32045036;rs31112062;rs47368358;rs32756586;rs45839990;rs252083450;rs32249444;rs51211918;rs33755574;rs31837891;rs32390142;rs252005115;rs30710796;rs31428291;rs50916411;rs31286471;rs38443544;rs36664522;rs37545577;rs38346127;rs13476221;rs48965551;rs4222799;rs30563210
chr1_14035.4	chr1:165190667-165190917	Intron (ENSMUST00000043338.9/108735, intron 1 of 7)		Sft2d2	6.36343	1	74.0332	72.5026	74.0332	166983008	163338902	166983008	Significant in baseline	Up effect	15	15	16	16	rs13476221	rs31112062;rs47368358;rs32756586;rs45839990;rs252083450;rs32249444;rs51211918;rs33755574;rs31837891;rs32390142;rs252005115;rs30710796;rs31428291;rs50916411;rs31286471;rs38443544;rs36664522;rs37545577;rs38346127;rs13476221
chr1_14035.5	chr1:165190917-165191167	Intron (ENSMUST00000043338.9/108735, intron 1 of 7)		Sft2d2	6.15116	1	74.0332	72.5026	74.0332	166983008	163338902	166983008	Significant in baseline	Up effect	15	15	16	16	rs13476221	rs31112062;rs47368358;rs32756586;rs45839990;rs252083450;rs32249444;rs51211918;rs33755574;rs31837891;rs32390142;rs252005115;rs30710796;rs31428291;rs50916411;rs31286471;rs38443544;rs36664522;rs37545577;rs38346127;rs13476221
chr1_14049.1	chr1:165304340-165304590	Promoter (1-2kb)		Gpr161	5.83768	1	72.5026	72.5026	74.0332	163338902	163338902	166983008	Significant in baseline	No effect	15	15	16	16	rs31112062	rs31112062;rs47368358;rs32756586;rs45839990;rs252083450;rs32249444;rs51211918;rs33755574;rs31837891;rs32390142;rs252005115;rs30710796;rs31428291;rs50916411;rs31286471;rs38443544;rs36664522;rs37545577;rs38346127;rs13476221
chr1_14049.2	chr1:165304590-165304840	Promoter (1-2kb)		Gpr161	6.29229	1	72.5026	72.5026	74.0332	163338902	163338902	166983008	Significant in baseline	No effect	15	15	16	16	rs31112062	rs31112062;rs47368358;rs32756586;rs45839990;rs252083450;rs32249444;rs51211918;rs33755574;rs31837891;rs32390142;rs252005115;rs30710796;rs31428291;rs50916411;rs31286471;rs38443544;rs36664522;rs37545577;rs38346127;rs13476221
chr1_14049.3	chr1:165304840-165305090	Promoter (2-3kb)		Gpr161	4.85457	1	74.1605	72.115	74.6753	167194662	163312366	167331141	Significant in baseline	No effect	16	16	15	15	rs48965551	rs32045036;rs31112062;rs47368358;rs32756586;rs45839990;rs252083450;rs32249444;rs51211918;rs33755574;rs31837891;rs32390142;rs252005115;rs30710796;rs31428291;rs50916411;rs31286471;rs38443544;rs36664522;rs37545577;rs38346127;rs13476221;rs48965551;rs4222799;rs30563210
chr1_14066.1	chr1:165350906-165351156	Promoter (<=1kb)		Dcaf6	4.59579	1	71.499	69.9483	74.1605	160285089	155096387	167194662	Significant in baseline	No effect	17	17	12	12	rs3693161	rs31598960;rs33692139;rs31404871;rs30497461;rs32737955;rs48733621;rs31266917;rs30694289;rs3696645;rs30471675;rs3722993;rs49525822;rs6209248;rs33742737;rs33740307;rs33739489;rs31315479;rs31303858;rs47852191;rs3693161;rs31694619;rs6255075;rs31200652;rs3685643;rs4222751;rs46133782;rs49476641;rs6341208;rs32045036;rs31112062;rs47368358;rs32756586;rs45839990;rs252083450;rs32249444;rs51211918;rs33755574…
chr1_14071.2	chr1:165440849-165441099	Intron (ENSMUST00000027856.12/74106, intron 1 of 18)		Dcaf6	4.40318	19	39.8971	38.617	46.3981	44991567	42483433	52202031	Significant in baseline	No effect	17	17	14	14	rs13483641	rs30621396;rs30320658;rs36772447;rs36652652;Affy_10467905;rs38080613;rs13483639;rs30667909;rs31274488;rs36521863;rs13483641;rs36931353;rs47499225;rs30320629;rs13483647;rs30886715;rs6376540;rs50610897;rs30567369;rs30556607;rs46999879;rs31157694;rs30419326;rs31282282;rs255692658;rs52477242;rs36491952;rs30902297;rs3691227;rs3660360;rs30367626;rs50499354;rs30313195;rs38377851;rs13483656;rs31206870;rs…
chr1_14089.2	chr1:165585783-165586033	Exon (ENSMUST00000191944.1/ENSMUST00000191944.1, exon 1 of 1)		Mpzl1	4.13564	1	73.1407	72.5026	75.5962	164858900	163338902	170535283	Significant in baseline	No effect	15	15	16	16	rs31837891	rs31112062;rs47368358;rs32756586;rs45839990;rs252083450;rs32249444;rs51211918;rs33755574;rs31837891;rs32390142;rs252005115;rs30710796;rs31428291;rs50916411;rs31286471;rs38443544;rs36664522;rs37545577;rs38346127;rs13476221;rs48965551;rs4222799;rs30563210;rs32238450;rs48267649;rs50209411;rs48742671
chr1_1409.2	chr1:32177636-32177886	Intron (ENSMUST00000027226.11/170771, intron 1 of 8)		Khdrbs2	4.13042	16	25.6883	25.6883	27.995	44143640	44143640	51051148	Significant in baseline	No effect	14	14	17	17	rs4179484	rs4179484;rs4179504;rs6282770;rs4180247;rs50202656;rs4181679;rs4185116;rs4186283
chr1_14104.4	chr1:165642008-165642258	Distal Intergenic	dELS	Mpzl1	4.37927	1	26.3868	23.158	32.7764	43686349	40874692	58115573	Significant in baseline	No effect	17	17	14	14	rs33447118	rs32764284;rs37147416;rs13475829;rs52625624;rs48741666;rs30667783;rs29552839;rs29633641;rs31864177;rs13475833;rs33275490;rs3714219;rs32671223;rs33392587;rs52628759;rs31652254;rs32044299;rs31012703;rs33444638;rs33447118;rs33447121;rs47782085;rs50434840;rs30761526;rs31572802;rs31555041;rs31885358;rs31983590;rs33586566;rs31954469;rs6321959;rs6322563;rs31612433;rs31745317;rs32434528;rs32093536;rs3132…
chr1_14113.1	chr1:165663402-165663652	Exon (ENSMUST00000040357.10/226594, exon 3 of 7)	dELS	Mpzl1	4.388	1	72.759	72.5026	74.0332	164065311	163338902	166983008	Significant in baseline	No effect	15	15	16	16	rs32756586	rs31112062;rs47368358;rs32756586;rs45839990;rs252083450;rs32249444;rs51211918;rs33755574;rs31837891;rs32390142;rs252005115;rs30710796;rs31428291;rs50916411;rs31286471;rs38443544;rs36664522;rs37545577;rs38346127;rs13476221
chr1_14129.1	chr1:165726753-165727003	Distal Intergenic		Rcsd1	3.66327	1	72.5026	71.8606	76.6714	163338902	162058587	170949421	Significant in baseline	No effect	15	15	16	16	rs31112062	rs31200652;rs3685643;rs4222751;rs46133782;rs49476641;rs6341208;rs32045036;rs31112062;rs47368358;rs32756586;rs45839990;rs252083450;rs32249444;rs51211918;rs33755574;rs31837891;rs32390142;rs252005115;rs30710796;rs31428291;rs50916411;rs31286471;rs38443544;rs36664522;rs37545577;rs38346127;rs13476221;rs48965551;rs4222799;rs30563210;rs32238450;rs48267649;rs50209411;rs48742671;Affy_10351506
chr1_14135.1	chr1:165768955-165769205	Promoter (<=1kb)	PLS	Creg1	5.39559	14	34.7802	30.7843	35.9997	89887238	77958779	93711205	Significant in baseline	No effect	12	12	17	17	rs50825643	rs13482262;rs51257993;rs30565505;rs30678419;rs13482263;rs3665356;rs46120541;rs31043651;rs6190358;rs6352085;rs32178029;rs30315663;rs32243760;rs30386882;rs13482270;rs30802214;rs31282914;rs32270416;rs31131715;rs211974888;rs13482276;rs47418472;rs30699113;rs30219843;rs30765185;rs49206095;rs30826154;rs37825333;rs253916075;UNC140502852;rs31432790;rs50825643;D14Mit7;rs30878936;rs30974854;rs30403916;rs134…
chr1_14175.3	chr1:166100176-166100426	Exon (ENSMUST00000192369.5/240892, exon 6 of 6)	DNase-H3K4me3	Styxl2	4.33274	1	72.5026	72.5026	74.0332	163338902	163338902	166983008	Significant in baseline	No effect	15	15	16	16	rs31112062	rs31112062;rs47368358;rs32756586;rs45839990;rs252083450;rs32249444;rs51211918;rs33755574;rs31837891;rs32390142;rs252005115;rs30710796;rs31428291;rs50916411;rs31286471;rs38443544;rs36664522;rs37545577;rs38346127;rs13476221
chr1_14184.2	chr1:166157429-166157679	Exon (ENSMUST00000060833.13/59290, exon 4 of 7)		Gpa33	3.72021	11	51.966	48.8809	53.4151	94758820	89751423	96683859	Significant in baseline	No effect	10	10	16	16	rs230648083	rs13481150;rs51608748;rs13481152;rs27076650;rs47255394;rs27061562;rs6247213;rs49776118;rs29387524;rs48129972;rs27074926;rs13481156;rs13481158;AffY_PC11_93;rs230648083;rs47752027;rs13481170;rs27105221;rs235845435;rs27052851
chr1_14192.3	chr1:166183084-166183334	Distal Intergenic		Gpa33	3.80136	7	45.4507	44.6854	48.5602	87244659	84149847	95983947	Significant in baseline	Protected effect	16	16	15	15	rs32174327	rs31476858;rs32066094;rs6278282;rs31521374;rs37626662;rs31488447;rs32267337;rs6394492;rs32174327;rs31133462;rs31178835;rs32409257;rs32326663;rs31182975;rs31345154;rs32416091;rs31867408;rs32124327;rs31349093;rs31709999;rs32510496;rs31238492;rs31093558;rs4226783;rs31732570;rs36361468;rs32131184;rs31481725;rs51546480;rs13479416
chr1_14212.1	chr1:166296453-166296703	Intron (ENSMUST00000192426.5/100039795, intron 3 of 3)		Ildr2	3.79834	1	72.5026	72.115	76.6714	163338902	163312366	170949421	Significant in baseline	No effect	15	15	16	16	rs31112062	rs32045036;rs31112062;rs47368358;rs32756586;rs45839990;rs252083450;rs32249444;rs51211918;rs33755574;rs31837891;rs32390142;rs252005115;rs30710796;rs31428291;rs50916411;rs31286471;rs38443544;rs36664522;rs37545577;rs38346127;rs13476221;rs48965551;rs4222799;rs30563210;rs32238450;rs48267649;rs50209411;rs48742671;Affy_10351506
chr1_14217.1	chr1:166303862-166304112	Intron (ENSMUST00000192426.5/100039795, intron 3 of 3)		Ildr2	3.61854	10	20.6177	7.96339	64.2343	46700765	20325683	126910230	Significant in baseline	Protected effect	23	23	8	8	rs29363370	rs13459119;rs51062012;rs13480531;Affy_PC10_22;Affy_PC10_24;Affy_PC10_25;Affy_4368969;rs48925239;rs48724254;rs29333273;rs49817746;rs38597300;rs29326999;rs6391751;rs29341085;rs29329970;rs29329527;rs29321101;rs13480569;rs29365459;rs13480570;rs29355236;rs13480575;rs13480580;rs13480581;rs29323860;rs13480601;rs29375788;rs29363370;rs29326444;rs29341768;rs29340218;Affy_PC10_51;rs3696307;rs49562956;rs2931…
chr1_14240.3	chr1:166398915-166399165	3' UTR		Pogk	3.70764	5	8.33083	3.39755	8.45805	18906696	12255014	19132157	Significant in baseline	No effect	15	15	16	16	rs33045702	rs29221520;rs31564288;rs31553475;rs3714258;rs29144480;rs29189681;rs50483697;rs29164705;rs31611156;rs47024152;rs29183953;rs6404215;rs3693453;rs29202009;rs31709594;rs29151778;rs29583344;rs46794257;rs33446800;rs33583186;rs33239535;rs49074950;rs13478117;rs33197550;rs31727027;rs33045702;rs31821694
chr1_14250.6	chr1:166430921-166431171	Distal Intergenic		Pogk	5.29755	1	72.759	72.5026	74.0332	164065311	163338902	166983008	Significant in baseline	No effect	15	15	16	16	rs32756586	rs31112062;rs47368358;rs32756586;rs45839990;rs252083450;rs32249444;rs51211918;rs33755574;rs31837891;rs32390142;rs252005115;rs30710796;rs31428291;rs50916411;rs31286471;rs38443544;rs36664522;rs37545577;rs38346127;rs13476221
chr1_14251.1	chr1:166431572-166431822	Exon (ENSMUST00000118577.1/ENSMUST00000118577.1, exon 1 of 1)		Pogk	6.43622	1	72.759	72.5026	74.0332	164065311	163338902	166983008	Significant in baseline	No effect	15	15	16	16	rs32756586	rs31112062;rs47368358;rs32756586;rs45839990;rs252083450;rs32249444;rs51211918;rs33755574;rs31837891;rs32390142;rs252005115;rs30710796;rs31428291;rs50916411;rs31286471;rs38443544;rs36664522;rs37545577;rs38346127;rs13476221
chr1_14261.1	chr1:166793148-166793398	Distal Intergenic	dELS	Fmo9	4.71884	1	74.0332	72.5026	79.303	166983008	163338902	171041085	Significant in baseline	Up effect	15	15	16	16	rs13476221	rs31112062;rs47368358;rs32756586;rs45839990;rs252083450;rs32249444;rs51211918;rs33755574;rs31837891;rs32390142;rs252005115;rs30710796;rs31428291;rs50916411;rs31286471;rs38443544;rs36664522;rs37545577;rs38346127;rs13476221;rs48965551;rs4222799;rs30563210;rs32238450;rs48267649;rs50209411;rs48742671;Affy_10351506;rs48042782
chr1_14261.2	chr1:166793398-166793648	Distal Intergenic		Fmo9	4.78553	1	72.759	72.5026	74.0332	164065311	163338902	166983008	Significant in baseline	No effect	15	15	16	16	rs32756586	rs31112062;rs47368358;rs32756586;rs45839990;rs252083450;rs32249444;rs51211918;rs33755574;rs31837891;rs32390142;rs252005115;rs30710796;rs31428291;rs50916411;rs31286471;rs38443544;rs36664522;rs37545577;rs38346127;rs13476221
chr1_14287.1	chr1:167047171-167047421	Intron (ENSMUST00000165874.7/226610, intron 1 of 2)		Fam78b	3.88063	1	72.759	72.115	76.6714	164065311	163312366	170949421	Significant in baseline	No effect	15	15	16	16	rs32756586	rs32045036;rs31112062;rs47368358;rs32756586;rs45839990;rs252083450;rs32249444;rs51211918;rs33755574;rs31837891;rs32390142;rs252005115;rs30710796;rs31428291;rs50916411;rs31286471;rs38443544;rs36664522;rs37545577;rs38346127;rs13476221;rs48965551;rs4222799;rs30563210;rs32238450;rs48267649;rs50209411;rs48742671;Affy_10351506
chr1_14293.5	chr1:167058407-167058657	Intron (ENSMUST00000165874.7/226610, intron 1 of 2)		Fam78b	3.72736	5	86.611	1.859	87.7699	146682242	3143128	150597426	Significant in baseline	No effect	11	11	20	20	rs51417856	rs31232890;rs29503906;rs31184306;rs29628794;rs3664617;rs30663086;rs31019259;rs33685759;rs50122585;rs29678115;rs3142610;rs37138772;rs29680149;rs33754543;rs29221520;rs31564288;rs31553475;rs3714258;rs29144480;rs29189681;rs50483697;rs29164705;rs31611156;rs47024152;rs29183953;rs6404215;rs3693453;rs29202009;rs31709594;rs29151778;rs29583344;rs46794257;rs33446800;rs33583186;rs33239535;rs49074950;rs134781…
chr1_14296.9	chr1:167067202-167067452	Intron (ENSMUST00000165874.7/226610, intron 1 of 2)	dELS	Fam78b	3.89595	6	29.1387	28.4947	29.7768	48979306	48921901	49655505	Significant in baseline	No effect	16	16	15	15	rs3669453	rs30015053;rs30755512;rs30721225;rs3669453;rs30368083;rs29871039;rs46435702;rs30118634;rs6390920;rs38638698;rs6155681
chr1_14331.8	chr1:167241123-167241373	Promoter (1-2kb)		Uck2	3.71917	9	55.3249	39.4825	57.2592	109865644	85126303	111455945	Significant in baseline	No effect	13	13	18	18	rs48979294	rs36269310;rs33673281;rs49705115;rs48978291;rs33757020;rs36333074;rs30134695;rs47120688;rs49669580;rs29606696;rs29882412;rs3700596;rs29846044;rs33087612;rs47477701;rs33081870;rs33093055;rs48369461;rs30268984;rs29944580;rs49022808;rs30464816;rs29648205;rs29589759;rs13480345;rs30172327;rs33727955;rs30161962;rs36442789;rs30431882;rs29982107;rs30040474;rs29597048;rs29888356;rs29936648;rs29595655;rs37…
chr1_14332.2	chr1:167242218-167242468	Promoter (<=1kb)	dELS	Uck2	4.56552	1	74.499	72.759	74.8025	167331141	164065311	167823479	Significant in baseline	Up effect	17	17	13	13	rs30563210	rs32756586;rs45839990;rs252083450;rs32249444;rs51211918;rs33755574;rs31837891;rs32390142;rs252005115;rs30710796;rs31428291;rs50916411;rs31286471;rs38443544;rs36664522;rs37545577;rs38346127;rs13476221;rs48965551;rs4222799;rs30563210;rs32238450;rs48267649
chr1_14332.3	chr1:167242468-167242718	Promoter (<=1kb)		Uck2	5.22138	1	74.8025	74.2877	75.5962	167823479	167223113	170535283	Significant in baseline	Protected effect	18	18	13	13	rs48267649	rs4222799;rs30563210;rs32238450;rs48267649;rs50209411;rs48742671
chr1_14335.2	chr1:167245448-167245698	Promoter (2-3kb)	dELS	Uck2	3.65815	1	74.8025	72.115	75.5962	167823479	163312366	170535283	Significant in baseline	No effect	18	18	13	13	rs48267649	rs32045036;rs31112062;rs47368358;rs32756586;rs45839990;rs252083450;rs32249444;rs51211918;rs33755574;rs31837891;rs32390142;rs252005115;rs30710796;rs31428291;rs50916411;rs31286471;rs38443544;rs36664522;rs37545577;rs38346127;rs13476221;rs48965551;rs4222799;rs30563210;rs32238450;rs48267649;rs50209411;rs48742671
chr1_14337.2	chr1:167249380-167249630	Intron (ENSMUST00000053686.8/80914, intron 1 of 6)	dELS,CTCF-bound	Uck2	5.04792	1	74.8025	74.2877	76.6714	167823479	167223113	170949421	Significant in baseline	No effect	18	18	13	13	rs48267649	rs4222799;rs30563210;rs32238450;rs48267649;rs50209411;rs48742671;Affy_10351506
chr1_14338.1	chr1:167251357-167251607	Exon (ENSMUST00000193076.1/ENSMUST00000193076.1, exon 4 of 4)		Uck2	7.06022	1	74.6753	74.2877	74.8025	167331141	167223113	167823479	Significant in baseline	Protected effect	18	18	13	13	rs30563210	rs4222799;rs30563210;rs32238450;rs48267649
chr1_14338.2	chr1:167251607-167251857	Intron (ENSMUST00000053686.8/80914, intron 1 of 6)		Uck2	5.46794	1	74.1605	72.759	74.8025	167194662	164065311	167823479	Significant in baseline	Protected effect	16	16	15	15	rs48965551	rs32756586;rs45839990;rs252083450;rs32249444;rs51211918;rs33755574;rs31837891;rs32390142;rs252005115;rs30710796;rs31428291;rs50916411;rs31286471;rs38443544;rs36664522;rs37545577;rs38346127;rs13476221;rs48965551;rs4222799;rs30563210;rs32238450;rs48267649
chr1_14341.1	chr1:167258772-167259022	Intron (ENSMUST00000053686.8/80914, intron 1 of 6)		Uck2	3.76516	1	74.499	72.5026	79.303	167331141	163338902	171041085	Significant in baseline	No effect	17	17	13	13	rs30563210	rs31112062;rs47368358;rs32756586;rs45839990;rs252083450;rs32249444;rs51211918;rs33755574;rs31837891;rs32390142;rs252005115;rs30710796;rs31428291;rs50916411;rs31286471;rs38443544;rs36664522;rs37545577;rs38346127;rs13476221;rs48965551;rs4222799;rs30563210;rs32238450;rs48267649;rs50209411;rs48742671;Affy_10351506;rs48042782
chr1_14350.10	chr1:167271453-167271703	Intron (ENSMUST00000053686.8/80914, intron 1 of 6)	dELS	Uck2	4.73456	16	23.7165	23.2056	25.6883	40115768	39118021	44143640	Significant in baseline	No effect	20	20	11	11	UNC160211952	D16Mit12;rs4176333;rs4176590;rs4176981;UNC160211952;rs4177501;rs4177853;rs4177946;rs4177951;rs4178505;rs4178971;rs4178975;rs4179355;rs4179445;rs4179484
chr1_14362.4	chr1:167308890-167309140	Promoter (<=1kb)	dELS	Tmco1	8.05165	1	74.6753	74.2877	74.8025	167331141	167223113	167823479	Significant in baseline	No effect	18	18	13	13	rs30563210	rs4222799;rs30563210;rs32238450;rs48267649
chr1_14363.1	chr1:167330966-167331216	3' UTR	dELS	Tmco1	3.65864	9	1.57705	0.920877	4.60564	10573030	7785297	22854061	Significant in baseline	No effect	13	13	16	16	rs13480068	rs30410408;rs13480068;rs29840614;rs13480073;rs29645163;rs29976601;rs48489234;rs30289969;rs30180803;UNC090022809;rs30026335
chr1_14368.2	chr1:167340214-167340464	Exon (ENSMUST00000157621.1/ENSMUST00000157621.1, exon 1 of 1)	dELS	Aldh9a1	4.60707	1	74.6753	74.1605	74.8025	167331141	167194662	167823479	Significant in baseline	No effect	18	18	13	13	rs30563210	rs48965551;rs4222799;rs30563210;rs32238450;rs48267649
chr1_14387.2	chr1:167388694-167388944	Intron (ENSMUST00000028005.2/66447, intron 1 of 5)		Mgst3	3.63571	1	74.0332	72.115	88.8768	166983008	163312366	186237051	Significant in baseline	No effect	15	15	16	16	rs13476221	rs32045036;rs31112062;rs47368358;rs32756586;rs45839990;rs252083450;rs32249444;rs51211918;rs33755574;rs31837891;rs32390142;rs252005115;rs30710796;rs31428291;rs50916411;rs31286471;rs38443544;rs36664522;rs37545577;rs38346127;rs13476221;rs48965551;rs4222799;rs30563210;rs32238450;rs48267649;rs50209411;rs48742671;Affy_10351506;rs48042782;rs8242766;rs31555580;rs31557390;rs3722740;rs3705274;rs31218323;rs…
chr1_14391.1	chr1:167437162-167437412	Distal Intergenic		Lrrc52	3.69151	18	6.149	3.17874	7.29701	14112799	9902168	16294373	Significant in baseline	No effect	16	16	15	15	rs13483217	rs13483200;rs4231742;rs6377403;UNCHS045463;UNCHS045465;CEAJAX00080374;rs48201165;rs13483213;rs239852520;rs29624709;rs31030509;rs13483217;rs29624764;rs13483224;rs29554218;rs48697581
chr1_14393.1	chr1:167442838-167443088	Distal Intergenic		Lrrc52	6.41699	1	74.6753	74.1605	74.8025	167331141	167194662	167823479	Significant in baseline	No effect	18	18	13	13	rs30563210	rs48965551;rs4222799;rs30563210;rs32238450;rs48267649
chr1_14404.2	chr1:167532752-167533002	Distal Intergenic		Rxrg	6.62677	1	74.6753	74.2877	74.8025	167331141	167223113	167823479	Significant in baseline	No effect	18	18	13	13	rs30563210	rs4222799;rs30563210;rs32238450;rs48267649
chr1_14421.1	chr1:167636934-167637184	Intron (ENSMUST00000015987.9/20183, intron 9 of 9)	CTCF-only,CTCF-bound	Rxrg	4.07745	1	33.679	31.2218	36.0463	59076759	54173819	62784088	Significant in baseline	No effect	12	12	18	18	rs31498570	rs33840699;rs51350456;rs47870456;rs29596070;rs13475876;rs32516530;rs13475879;rs29655680;rs29659120;rs29692016;rs31726356;rs31876473;rs6325108;rs31498570;rs13475883;rs13475885;rs13475887;rs49196471;rs29963534;rs32161565
chr1_14421.2	chr1:167637184-167637434	Intron (ENSMUST00000015987.9/20183, intron 9 of 9)	CTCF-only,CTCF-bound	Rxrg	3.671	1	33.679	17.084	86.9486	59076759	32343834	184880370	Significant in baseline	No effect	12	12	18	18	rs31498570	rs30598074;rs13475795;rs30849932;rs46323879;rs31518908;rs31710287;rs16808053;rs221967485;rs47717565;rs13475808;rs30604008;rs30525912;rs13475810;rs13475816;rs32180312;rs31935537;rs32551229;rs32942136;rs32635513;rs3705697;Affy_10345622;Affy_5433680;rs32988364;rs31528685;rs30611861;rs31574517;rs30868358;rs31440687;rs51951745;rs31449667;rs33132305;rs30551147;rs13475821;rs36367128;rs32764284;rs3714741…
chr1_14440.1	chr1:167802473-167802723	Intron (ENSMUST00000111377.7/110648, intron 4 of 8)	dELS	Lmx1a	3.9214	1	74.8025	74.1605	75.5962	167823479	167194662	170535283	Significant in baseline	No effect	18	18	13	13	rs48267649	rs48965551;rs4222799;rs30563210;rs32238450;rs48267649;rs50209411;rs48742671
chr1_14440.2	chr1:167802723-167802973	Intron (ENSMUST00000111377.7/110648, intron 4 of 8)	dELS	Lmx1a	3.78572	1	74.6753	72.5026	76.6714	167331141	163338902	170949421	Significant in baseline	No effect	18	18	13	13	rs30563210	rs31112062;rs47368358;rs32756586;rs45839990;rs252083450;rs32249444;rs51211918;rs33755574;rs31837891;rs32390142;rs252005115;rs30710796;rs31428291;rs50916411;rs31286471;rs38443544;rs36664522;rs37545577;rs38346127;rs13476221;rs48965551;rs4222799;rs30563210;rs32238450;rs48267649;rs50209411;rs48742671;Affy_10351506
chr1_14443.1	chr1:167821160-167821410	Intron (ENSMUST00000111377.7/110648, intron 4 of 8)		Lmx1a	4.54226	1	74.8025	74.2877	75.5962	167823479	167223113	170535283	Significant in baseline	No effect	18	18	13	13	rs48267649	rs4222799;rs30563210;rs32238450;rs48267649;rs50209411;rs48742671
chr1_14446.1	chr1:167885792-167886042	Distal Intergenic		Lmx1a	7.37937	1	74.8025	74.2877	74.8025	167823479	167223113	167823479	Significant in baseline	No effect	18	18	13	13	rs48267649	rs4222799;rs30563210;rs32238450;rs48267649
chr1_14447.1	chr1:167896000-167896250	Distal Intergenic		Lmx1a	5.52756	1	74.8025	72.759	75.5962	167823479	164065311	170535283	Significant in baseline	No effect	18	18	13	13	rs48267649	rs32756586;rs45839990;rs252083450;rs32249444;rs51211918;rs33755574;rs31837891;rs32390142;rs252005115;rs30710796;rs31428291;rs50916411;rs31286471;rs38443544;rs36664522;rs37545577;rs38346127;rs13476221;rs48965551;rs4222799;rs30563210;rs32238450;rs48267649;rs50209411;rs48742671
chr1_14472.1	chr1:168129258-168129508	Intron (ENSMUST00000188912.6/18514, intron 7 of 7)		Pbx1	6.62989	1	74.8025	74.2877	74.8025	167823479	167223113	167823479	Significant in baseline	No effect	18	18	13	13	rs48267649	rs4222799;rs30563210;rs32238450;rs48267649
chr1_1453.1	chr1:33194963-33195213	Distal Intergenic		Prim2	7.60965	1	17.3385	17.084	17.8474	33721638	32343834	35538546	Significant in baseline	No effect	18	18	13	13	rs46323879	rs30598074;rs13475795;rs30849932;rs46323879;rs31518908;rs31710287;rs16808053;rs221967485;rs47717565;rs13475808
chr1_1453.2	chr1:33195213-33195463	Distal Intergenic		Prim2	6.92766	1	17.3385	17.084	20.1595	33721638	32343834	39020746	Significant in baseline	No effect	18	18	13	13	rs46323879	rs30598074;rs13475795;rs30849932;rs46323879;rs31518908;rs31710287;rs16808053;rs221967485;rs47717565;rs13475808;rs30604008;rs30525912;rs13475810;rs13475816;rs32180312;rs31935537;rs32551229;rs32942136;rs32635513;rs3705697;Affy_10345622;Affy_5433680;rs32988364;rs31528685;rs30611861;rs31574517;rs30868358
chr1_1455.1	chr1:33271445-33271695	Distal Intergenic	dELS	Prim2	4.23593	1	17.3385	16.0088	25.8759	33721638	32082234	43444074	Significant in baseline	No effect	18	18	13	13	rs46323879	rs32760971;rs31818207;rs30598074;rs13475795;rs30849932;rs46323879;rs31518908;rs31710287;rs16808053;rs221967485;rs47717565;rs13475808;rs30604008;rs30525912;rs13475810;rs13475816;rs32180312;rs31935537;rs32551229;rs32942136;rs32635513;rs3705697;Affy_10345622;Affy_5433680;rs32988364;rs31528685;rs30611861;rs31574517;rs30868358;rs31440687;rs51951745;rs31449667;rs33132305;rs30551147;rs13475821;rs3636712…
chr1_1455.2	chr1:33271695-33271945	Distal Intergenic	dELS; dELS,CTCF-bound	Prim2	5.37573	1	17.3385	16.0088	20.1595	33721638	32082234	39020746	Significant in baseline	No effect	18	18	13	13	rs46323879	rs32760971;rs31818207;rs30598074;rs13475795;rs30849932;rs46323879;rs31518908;rs31710287;rs16808053;rs221967485;rs47717565;rs13475808;rs30604008;rs30525912;rs13475810;rs13475816;rs32180312;rs31935537;rs32551229;rs32942136;rs32635513;rs3705697;Affy_10345622;Affy_5433680;rs32988364;rs31528685;rs30611861;rs31574517;rs30868358
chr1_14552.4	chr1:168364422-168364672	Intron (ENSMUST00000188912.6/18514, intron 2 of 7)		Pbx1	4.18403	6	1.342	1.342	20.6769	3266392	3266392	37652648	Significant in baseline	Protected effect	20	20	11	11	rs32426984	rs32426984;rs30759941;rs13478602;rs30654669;rs6180149;rs32448234;rs29924446;rs30754715;rs30860624;rs30715633;rs30223468;rs30450019;rs29922474;rs49698565;rs13478617;rs37214208;rs29978844;rs30957887;rs30272308;rs29912091;rs30952145;rs30845880;rs29926568;rs30033882;rs30518301;rs13478632;rs30710547;rs29829269;rs36857136;rs13478638;rs30704977;rs48624953;rs6198430;rs13478641;rs48722164;rs49311321;rs301…
chr1_14611.2	chr1:169485412-169485662	Distal Intergenic	dELS	Nuf2	4.10789	14	49.8807	48.7034	50.4015	118462433	117688529	118537399	Significant in baseline	No effect	15	15	15	15	rs30259301	rs6286809;rs3711767;rs30438807;rs30259301;rs49879578
chr1_14669.2	chr1:170085143-170085393	Intron (ENSMUST00000194690.5/18214, intron 2 of 17)	pELS	Ddr2	3.80868	1	32.2616	29.2836	89.004	57596351	46926036	186809682	Significant in baseline	No effect	15	15	16	16	rs32516530	rs32434528;rs32093536;rs31325347;rs32602884;rs32209957;rs32662962;rs31517020;rs31565873;rs13475872;rs32434080;rs33840699;rs51350456;rs47870456;rs29596070;rs13475876;rs32516530;rs13475879;rs29655680;rs29659120;rs29692016;rs31726356;rs31876473;rs6325108;rs31498570;rs13475883;rs13475885;rs13475887;rs49196471;rs29963534;rs32161565;rs32416624;rs3703813;rs52470670;rs3162895;rs30173232;rs30465484;rs4584…
chr1_14692.1	chr1:170244832-170245082	Intron (ENSMUST00000097470.3/545378, intron 1 of 2)		Gm6345	5.00949	1	30.499	29.2836	32.0052	51967970	46926036	55127480	Significant in baseline	Protected effect	12	12	17	17	rs31565873	rs32434528;rs32093536;rs31325347;rs32602884;rs32209957;rs32662962;rs31517020;rs31565873;rs13475872;rs32434080;rs33840699;rs51350456;rs47870456;rs29596070;rs13475876
chr1_14811.6	chr1:170521559-170521809	Intron (ENSMUST00000160456.7/70729, intron 1 of 9)	dELS	Nos1ap	3.8647	5	45.2983	40.3585	62.2125	90404862	76145898	123165952	Significant in baseline	No effect	7	7	24	24	rs31702694	rs3153753;rs6222023;rs33381347;rs6257272;rs13478336;rs29566735;rs33576539;rs33644925;rs29523614;rs33067522;rs31609646;rs3675410;rs33378080;rs33513530;rs13478361;rs29778798;rs33704055;rs31633450;rs6262346;rs31647919;rs33739891;rs36756778;rs33191657;rs33567801;rs33102602;rs29567700;rs6167407;rs33341991;rs33743089;rs239322408;rs47992579;rs31702694;rs4225368;UNCHS015017;rs52431723;rs3723202;rs1347839…
chr1_1482.2	chr1:33600299-33600549	Intron (ENSMUST00000027312.10/19076, intron 7 of 13)		Prim2	3.9529	7	43.1288	7.90564	45.4507	83050747	23789532	87244659	Significant in baseline	No effect	16	16	15	15	rs46378974	rs46067640;rs49693858;rs31572894;rs31153518;Affy_4916353;rs13479153;rs51415723;rs8240817;rs49329686;rs31966575;rs36536360;rs31988344;rs37287696;rs13479163;rs39775784;rs32219787;rs31793211;rs46477628;rs32185835;rs47734376;rs32524656;rs31691249;rs47206075;rs46476185;rs32501401;rs46107184;rs52305240;rs31940507;rs32012050;rs37208863;rs31512362;rs31561779;rs32477373;rs32067315;rs47488275;rs46107226;rs…
chr1_14859.2	chr1:170668630-170668880	Exon (ENSMUST00000046792.8/320078, exon 6 of 8)		Olfml2b	3.62111	7	43.0016	7.65119	44.0292	82178629	20042398	83878657	Significant in baseline	Protected effect	16	16	15	15	rs32426322	rs51319463;rs260994887;UNCHS019541;rs46067640;rs49693858;rs31572894;rs31153518;Affy_4916353;rs13479153;rs51415723;rs8240817;rs49329686;rs31966575;rs36536360;rs31988344;rs37287696;rs13479163;rs39775784;rs32219787;rs31793211;rs46477628;rs32185835;rs47734376;rs32524656;rs31691249;rs47206075;rs46476185;rs32501401;rs46107184;rs52305240;rs31940507;rs32012050;rs37208863;rs31512362;rs31561779;rs32477373;…
chr1_14863.3	chr1:170678890-170679140	Intron (ENSMUST00000046792.8/320078, intron 6 of 7)		Olfml2b	3.6337	18	42.096	40.4294	45.4598	68189477	68185097	71368682	Significant in baseline	Protected effect	21	21	10	10	rs29539715	rs29967647;rs29539715;rs30216358;rs6346101;rs29984158;rs38772382;rs36370782;rs38013414;rs3718618;rs50446650;rs30108189;rs29679218;rs13483426;rs50596970;rs13483427;rs37962335;rs36660212;rs48285979;rs3663078
chr1_14930.1	chr1:171063540-171063790	Promoter (<=1kb)		Mir6546	7.15312	1	78.499	76.6714	80.452	171041085	170949421	172706936	Significant in baseline	Protected effect	15	15	12	12	rs48042782	Affy_10351506;rs48042782;rs8242766;rs31555580;rs31557390;rs3722740;rs3705274;rs31218323;rs47959443;rs31572828;rs31567752;rs31561281;rs31559428;rs49959361
chr1_14932.1	chr1:171069578-171069828	Distal Intergenic		Fcgr3	4.58704	1	78.499	76.6714	80.5792	171041085	170949421	172911308	Significant in baseline	No effect	15	15	12	12	rs48042782	Affy_10351506;rs48042782;rs8242766;rs31555580;rs31557390;rs3722740;rs3705274;rs31218323;rs47959443;rs31572828;rs31567752;rs31561281;rs31559428;rs49959361;rs51348059;rs259230007
chr1_14933.1	chr1:171073840-171074046	Distal Intergenic		Fcgr3	6.66282	1	78.499	76.6714	80.5792	171041085	170949421	172911308	Significant in baseline	No effect	15	15	12	12	rs48042782	Affy_10351506;rs48042782;rs8242766;rs31555580;rs31557390;rs3722740;rs3705274;rs31218323;rs47959443;rs31572828;rs31567752;rs31561281;rs31559428;rs49959361;rs51348059;rs259230007
chr1_14934.1	chr1:171074390-171074613	Distal Intergenic		Fcgr3	6.95256	1	78.499	76.6714	80.452	171041085	170949421	172706936	Significant in baseline	Up effect	15	15	12	12	rs48042782	Affy_10351506;rs48042782;rs8242766;rs31555580;rs31557390;rs3722740;rs3705274;rs31218323;rs47959443;rs31572828;rs31567752;rs31561281;rs31559428;rs49959361
chr1_14935.1	chr1:171077885-171077992	Distal Intergenic		Fcgr3	7.39675	1	78.499	76.6714	80.5792	171041085	170949421	172911308	Significant in baseline	No effect	15	15	12	12	rs48042782	Affy_10351506;rs48042782;rs8242766;rs31555580;rs31557390;rs3722740;rs3705274;rs31218323;rs47959443;rs31572828;rs31567752;rs31561281;rs31559428;rs49959361;rs51348059;rs259230007
chr1_14936.1	chr1:171081988-171082103	Distal Intergenic		Fcgr3	7.18647	1	78.499	76.6714	80.3248	171041085	170949421	172444585	Significant in baseline	Protected effect	15	15	12	12	rs48042782	Affy_10351506;rs48042782;rs8242766;rs31555580;rs31557390;rs3722740;rs3705274;rs31218323;rs47959443;rs31572828;rs31567752;rs31561281
chr1_14937.1	chr1:171085720-171085970	Distal Intergenic	DNase-H3K4me3	Fcgr3	3.88737	1	81.2213	76.6714	84.7601	173645553	170949421	183513186	Significant in baseline	No effect	17	17	14	14	rs31587587	Affy_10351506;rs48042782;rs8242766;rs31555580;rs31557390;rs3722740;rs3705274;rs31218323;rs47959443;rs31572828;rs31567752;rs31561281;rs31559428;rs49959361;rs51348059;rs259230007;rs31612847;rs31608155;rs31405208;rs46128598;rs31590468;rs31587587;rs31584856;rs3682996;rs3669108;rs6375522;rs4136041;rs31329176;rs31420065;rs32559774;Affy_10352113;Affy_4563273;rs30712622;rs31282255;rs30991108;rs32374329;r…
chr1_14953.1	chr1:171129300-171129550	3' UTR	dELS,CTCF-bound	Cfap126	4.20729	1	79.303	76.6714	85.1477	171041085	170949421	183579128	Significant in baseline	No effect	17	17	13	13	rs48042782	Affy_10351506;rs48042782;rs8242766;rs31555580;rs31557390;rs3722740;rs3705274;rs31218323;rs47959443;rs31572828;rs31567752;rs31561281;rs31559428;rs49959361;rs51348059;rs259230007;rs31612847;rs31608155;rs31405208;rs46128598;rs31590468;rs31587587;rs31584856;rs3682996;rs3669108;rs6375522;rs4136041;rs31329176;rs31420065;rs32559774;Affy_10352113;Affy_4563273;rs30712622;rs31282255;rs30991108;rs32374329;r…
chr1_14959.2	chr1:171159638-171159888	Promoter (<=1kb)	DNase-H3K4me3; DNase-H3K4me3,CTCF-bound	Mpz	3.82598	2	93.546	91.7453	98.4467	173549576	173244458	178717320	Significant in baseline	No effect	15	15	13	13	rs27644503	rs46920619;rs27615350;rs27621324;rs27644551;rs27644503;rs27644500;rs6384888;rs27644412;rs33360234;Affy_PC2_176;rs3674193
chr1_14966.6	chr1:171220474-171220724	Promoter (1-2kb)		Tomm40l	3.94737	13	33.742	28.6869	35.2618	72968925	63703994	75764157	Significant in baseline	No effect	18	18	9	9	rs13481874	rs29689416;rs29509534;rs6220659;rs3657887;rs13481855;rs4229817;rs51286184;rs49026352;rs236792219;rs52063333;rs13481870;rs45644585;rs29569546;rs51350717;rs29632229;rs13481874;rs3712509;rs3664096
chr1_14966.6	chr1:171220474-171220724	Promoter (1-2kb)		Tomm40l	4.09564	13	41.1512	37.4813	44.7453	87578767	81854958	99681673	Significant in baseline	No effect	24	24	7	7	rs6250834	rs3686754;rs51375527;rs48216449;rs51541230;rs50114462;rs3669221;rs29548489;rs29712135;rs48409439;rs29565666;rs6314989;rs29529895;rs6250834;rs29243090;rs3685298;rs49593219;rs52535017;rs6322774;rs30062272;rs29234038;rs29226424;rs29536628;rs6328703;rs47217007;rs46699159;rs13481943;rs29909458;rs29956515;rs29236217;rs49555935;rs13481955;rs4229988;rs29636879;rs47401688;rs4230010;rs219466766;rs3696278;r…
chr1_15011.3	chr1:171344482-171344732	Promoter (<=1kb)	dELS; pELS,CTCF-bound	Nit1	6.39448	4	64.3565	63.5731	64.8654	144912885	143341277	148935054	Significant in baseline	No effect	19	19	12	12	rs221225962	JAX00569577;UNCHS013186;rs6316136;rs27597234;rs221225962;rs45687877;rs27616924;rs46339509;ICR1509;UNCHS013262;rs32568801;UNC8429604
chr1_15011.4	chr1:171344732-171344982	Promoter (<=1kb)	dELS	Nit1	4.60575	4	64.2293	63.3187	64.8654	143369825	143030450	148935054	Significant in baseline	No effect	19	19	12	12	rs6316136	rs27596611;rs32586815;rs32980875;UNCHS013183;JAX00569577;UNCHS013186;rs6316136;rs27597234;rs221225962;rs45687877;rs27616924;rs46339509;ICR1509;UNCHS013262;rs32568801;UNC8429604
chr1_15027.3	chr1:171380054-171380304	Exon (ENSMUST00000111286.8/71740, exon 3 of 10)	dELS,CTCF-bound	Arhgap30	3.65813	6	1.46923	1.342	78.0146	3847193	3266392	147652323	Significant in baseline	No effect	19	19	12	12	rs13478602	rs32426984;rs30759941;rs13478602;rs30654669;rs6180149;rs32448234;rs29924446;rs30754715;rs30860624;rs30715633;rs30223468;rs30450019;rs29922474;rs49698565;rs13478617;rs37214208;rs29978844;rs30957887;rs30272308;rs29912091;rs30952145;rs30845880;rs29926568;rs30033882;rs30518301;rs13478632;rs30710547;rs29829269;rs36857136;rs13478638;rs30704977;rs48624953;rs6198430;rs13478641;rs48722164;rs49311321;rs301…
chr1_15030.2	chr1:171384343-171384593	Intron (ENSMUST00000111286.8/71740, intron 5 of 9)	DNase-H3K4me3	Arhgap30	3.80367	7	9.826	7.90564	43.3852	24937916	23789532	83629949	Significant in baseline	No effect	18	18	6	6	rs13479153	rs46067640;rs49693858;rs31572894;rs31153518;Affy_4916353;rs13479153;rs51415723;rs8240817;rs49329686;rs31966575;rs36536360;rs31988344;rs37287696;rs13479163;rs39775784;rs32219787;rs31793211;rs46477628;rs32185835;rs47734376;rs32524656;rs31691249;rs47206075;rs46476185;rs32501401;rs46107184;rs52305240;rs31940507;rs32012050;rs37208863;rs31512362;rs31561779;rs32477373;rs32067315;rs47488275;rs46107226;rs…
chr1_15045.1	chr1:171437180-171437430	Promoter (<=1kb)	dELS,CTCF-bound	F11r	3.83454	14	5.024	2.024	6.02374	19780031	3000000	24000000	Significant in baseline	No effect	18	18	6	6	rs30690390	14P_no_data;rs4230140;rs48403312;rs30643712;rs30642877;rs31187642;rs31042846;rs107630194;rs30677101;rs13482084;rs46327218;rs30464241;rs264848434;rs46878507;rs243237194;rs30675742;rs49868234;rs30461634;rs52350512;rs30771569;rs30688618;rs30690390;D14Mit50;rs30767507;rs31424090;rs30742361;rs30725293;rs3658866;Affy_PC14_25
chr1_15049.1	chr1:171474320-171474570	Distal Intergenic	dELS	F11r	4.15608	1	79.303	76.6714	83.4858	171041085	170949421	179862838	Significant in baseline	Up effect	17	17	13	13	rs48042782	Affy_10351506;rs48042782;rs8242766;rs31555580;rs31557390;rs3722740;rs3705274;rs31218323;rs47959443;rs31572828;rs31567752;rs31561281;rs31559428;rs49959361;rs51348059;rs259230007;rs31612847;rs31608155;rs31405208;rs46128598;rs31590468;rs31587587;rs31584856;rs3682996;rs3669108;rs6375522;rs4136041;rs31329176;rs31420065;rs32559774;Affy_10352113;Affy_4563273;rs30712622
chr1_15050.1	chr1:171477854-171478104	Distal Intergenic	pELS	F11r	5.1448	1	78.499	75.5962	81.2213	171041085	170535283	173645553	Significant in baseline	No effect	15	15	12	12	rs48042782	rs48742671;Affy_10351506;rs48042782;rs8242766;rs31555580;rs31557390;rs3722740;rs3705274;rs31218323;rs47959443;rs31572828;rs31567752;rs31561281;rs31559428;rs49959361;rs51348059;rs259230007;rs31612847;rs31608155;rs31405208;rs46128598;rs31590468;rs31587587
chr1_15053.1	chr1:171501454-171501704	Promoter (1-2kb)	dELS,CTCF-bound	Alyref2	3.63712	1	83.4858	72.5026	85.1477	179862838	163338902	183579128	Significant in baseline	Protected effect	20	20	11	11	rs30712622	rs31112062;rs47368358;rs32756586;rs45839990;rs252083450;rs32249444;rs51211918;rs33755574;rs31837891;rs32390142;rs252005115;rs30710796;rs31428291;rs50916411;rs31286471;rs38443544;rs36664522;rs37545577;rs38346127;rs13476221;rs48965551;rs4222799;rs30563210;rs32238450;rs48267649;rs50209411;rs48742671;Affy_10351506;rs48042782;rs8242766;rs31555580;rs31557390;rs3722740;rs3705274;rs31218323;rs47959443;rs…
chr1_15054.1	chr1:171502385-171502635	Promoter (<=1kb)	dELS,CTCF-bound	Alyref2	4.10698	1	78.499	74.2877	83.6131	171041085	167223113	179922241	Significant in baseline	No effect	15	15	12	12	rs48042782	rs4222799;rs30563210;rs32238450;rs48267649;rs50209411;rs48742671;Affy_10351506;rs48042782;rs8242766;rs31555580;rs31557390;rs3722740;rs3705274;rs31218323;rs47959443;rs31572828;rs31567752;rs31561281;rs31559428;rs49959361;rs51348059;rs259230007;rs31612847;rs31608155;rs31405208;rs46128598;rs31590468;rs31587587;rs31584856;rs3682996;rs3669108;rs6375522;rs4136041;rs31329176;rs31420065;rs32559774;Affy_10…
chr1_15055.4	chr1:171503544-171503794	Promoter (<=1kb)	dELS,CTCF-bound	Alyref2	5.04758	1	78.499	75.5962	83.4858	171041085	170535283	179862838	Significant in baseline	Protected effect	15	15	12	12	rs48042782	rs48742671;Affy_10351506;rs48042782;rs8242766;rs31555580;rs31557390;rs3722740;rs3705274;rs31218323;rs47959443;rs31572828;rs31567752;rs31561281;rs31559428;rs49959361;rs51348059;rs259230007;rs31612847;rs31608155;rs31405208;rs46128598;rs31590468;rs31587587;rs31584856;rs3682996;rs3669108;rs6375522;rs4136041;rs31329176;rs31420065;rs32559774;Affy_10352113;Affy_4563273;rs30712622
chr1_15055.5	chr1:171503794-171504044	Promoter (<=1kb)	dELS,CTCF-bound	Alyref2	4.35422	1	78.499	76.6714	81.2213	171041085	170949421	173645553	Significant in baseline	No effect	15	15	12	12	rs48042782	Affy_10351506;rs48042782;rs8242766;rs31555580;rs31557390;rs3722740;rs3705274;rs31218323;rs47959443;rs31572828;rs31567752;rs31561281;rs31559428;rs49959361;rs51348059;rs259230007;rs31612847;rs31608155;rs31405208;rs46128598;rs31590468;rs31587587
chr1_15055.6	chr1:171504044-171504294	Promoter (<=1kb)	dELS; dELS,CTCF-bound	Alyref2	3.93947	1	78.499	76.6714	82.1197	171041085	170949421	178156680	Significant in baseline	Protected effect	15	15	12	12	rs48042782	Affy_10351506;rs48042782;rs8242766;rs31555580;rs31557390;rs3722740;rs3705274;rs31218323;rs47959443;rs31572828;rs31567752;rs31561281;rs31559428;rs49959361;rs51348059;rs259230007;rs31612847;rs31608155;rs31405208;rs46128598;rs31590468;rs31587587;rs31584856;rs3682996;rs3669108;rs6375522;rs4136041;rs31329176;rs31420065;rs32559774;Affy_10352113;Affy_4563273
chr1_15056.2	chr1:171507044-171507294	Distal Intergenic		Alyref2	4.22552	1	79.303	76.6714	81.094	171041085	170949421	173633577	Significant in baseline	No effect	17	17	13	13	rs48042782	Affy_10351506;rs48042782;rs8242766;rs31555580;rs31557390;rs3722740;rs3705274;rs31218323;rs47959443;rs31572828;rs31567752;rs31561281;rs31559428;rs49959361;rs51348059;rs259230007;rs31612847;rs31608155;rs31405208;rs46128598
chr1_15056.3	chr1:171507294-171507544	Distal Intergenic		Alyref2	4.22968	14	2.024	2.024	4.56088	3000000	3000000	19755208	Significant in baseline	No effect	24	24	7	7	14P_no_data	14P_no_data;rs4230140;rs48403312;rs30643712;rs30642877;rs31187642;rs31042846;rs107630194;rs30677101;rs13482084;rs46327218;rs30464241;rs264848434;rs46878507;rs243237194;rs30675742;rs49868234;rs30461634;rs52350512;rs30771569;rs30688618
chr1_15057.1	chr1:171508963-171509213	Distal Intergenic		Alyref2	7.06491	1	78.499	76.6714	80.5792	171041085	170949421	172911308	Significant in baseline	No effect	15	15	12	12	rs48042782	Affy_10351506;rs48042782;rs8242766;rs31555580;rs31557390;rs3722740;rs3705274;rs31218323;rs47959443;rs31572828;rs31567752;rs31561281;rs31559428;rs49959361;rs51348059;rs259230007
chr1_15059.1	chr1:171514061-171514311	Distal Intergenic		Alyref2	6.29165	1	78.499	76.6714	80.5792	171041085	170949421	172911308	Significant in baseline	No effect	15	15	12	12	rs48042782	Affy_10351506;rs48042782;rs8242766;rs31555580;rs31557390;rs3722740;rs3705274;rs31218323;rs47959443;rs31572828;rs31567752;rs31561281;rs31559428;rs49959361;rs51348059;rs259230007
chr1_15060.1	chr1:171514686-171514936	Distal Intergenic		Alyref2	5.91079	1	78.499	76.6714	80.3248	171041085	170949421	172444585	Significant in baseline	No effect	15	15	12	12	rs48042782	Affy_10351506;rs48042782;rs8242766;rs31555580;rs31557390;rs3722740;rs3705274;rs31218323;rs47959443;rs31572828;rs31567752;rs31561281
chr1_15060.2	chr1:171514936-171515186	Distal Intergenic	CTCF-only,CTCF-bound	Alyref2	6.51305	1	79.303	76.6714	80.452	171041085	170949421	172706936	Significant in baseline	No effect	17	17	13	13	rs48042782	Affy_10351506;rs48042782;rs8242766;rs31555580;rs31557390;rs3722740;rs3705274;rs31218323;rs47959443;rs31572828;rs31567752;rs31561281;rs31559428;rs49959361
chr1_15061.1	chr1:171515731-171515981	Exon (ENSMUST00000043170.3/ENSMUST00000043170.3, exon 2 of 3)		Alyref2	5.99838	1	78.499	76.6714	80.452	171041085	170949421	172706936	Significant in baseline	Protected effect	15	15	12	12	rs48042782	Affy_10351506;rs48042782;rs8242766;rs31555580;rs31557390;rs3722740;rs3705274;rs31218323;rs47959443;rs31572828;rs31567752;rs31561281;rs31559428;rs49959361
chr1_15061.2	chr1:171515981-171516231	Intron (ENSMUST00000043170.3/ENSMUST00000043170.3, intron 2 of 2)		Alyref2	6.67403	1	78.499	76.6714	80.3248	171041085	170949421	172444585	Significant in baseline	No effect	15	15	12	12	rs48042782	Affy_10351506;rs48042782;rs8242766;rs31555580;rs31557390;rs3722740;rs3705274;rs31218323;rs47959443;rs31572828;rs31567752;rs31561281
chr1_15061.3	chr1:171516231-171516481	Intron (ENSMUST00000043170.3/ENSMUST00000043170.3, intron 2 of 2)		Alyref2	6.54191	1	78.499	76.6714	80.3248	171041085	170949421	172444585	Significant in baseline	No effect	15	15	12	12	rs48042782	Affy_10351506;rs48042782;rs8242766;rs31555580;rs31557390;rs3722740;rs3705274;rs31218323;rs47959443;rs31572828;rs31567752;rs31561281
chr1_15061.4	chr1:171516481-171516731	Intron (ENSMUST00000043170.3/ENSMUST00000043170.3, intron 2 of 2)		Alyref2	6.37893	1	78.499	76.6714	80.3248	171041085	170949421	172444585	Significant in baseline	No effect	15	15	12	12	rs48042782	Affy_10351506;rs48042782;rs8242766;rs31555580;rs31557390;rs3722740;rs3705274;rs31218323;rs47959443;rs31572828;rs31567752;rs31561281
chr1_15062.1	chr1:171517644-171517894	Distal Intergenic		Itln1	6.24061	1	78.499	76.6714	80.452	171041085	170949421	172706936	Significant in baseline	Protected effect	15	15	12	12	rs48042782	Affy_10351506;rs48042782;rs8242766;rs31555580;rs31557390;rs3722740;rs3705274;rs31218323;rs47959443;rs31572828;rs31567752;rs31561281;rs31559428;rs49959361
chr1_15062.2	chr1:171517894-171518144	3' UTR		Itln1	6.09695	1	79.303	76.6714	80.5792	171041085	170949421	172911308	Significant in baseline	No effect	17	17	13	13	rs48042782	Affy_10351506;rs48042782;rs8242766;rs31555580;rs31557390;rs3722740;rs3705274;rs31218323;rs47959443;rs31572828;rs31567752;rs31561281;rs31559428;rs49959361;rs51348059;rs259230007
chr1_15062.3	chr1:171518144-171518394	3' UTR		Itln1	6.62242	1	78.499	76.6714	80.5792	171041085	170949421	172911308	Significant in baseline	No effect	15	15	12	12	rs48042782	Affy_10351506;rs48042782;rs8242766;rs31555580;rs31557390;rs3722740;rs3705274;rs31218323;rs47959443;rs31572828;rs31567752;rs31561281;rs31559428;rs49959361;rs51348059;rs259230007
chr1_15062.4	chr1:171518394-171518644	Intron (ENSMUST00000043094.12/16429, intron 7 of 7)		Itln1	6.58819	1	78.499	76.6714	80.452	171041085	170949421	172706936	Significant in baseline	No effect	15	15	12	12	rs48042782	Affy_10351506;rs48042782;rs8242766;rs31555580;rs31557390;rs3722740;rs3705274;rs31218323;rs47959443;rs31572828;rs31567752;rs31561281;rs31559428;rs49959361
chr1_15063.1	chr1:171524841-171525091	Intron (ENSMUST00000043094.12/16429, intron 7 of 7)		Itln1	6.17734	1	78.499	76.6714	80.5792	171041085	170949421	172911308	Significant in baseline	No effect	15	15	12	12	rs48042782	Affy_10351506;rs48042782;rs8242766;rs31555580;rs31557390;rs3722740;rs3705274;rs31218323;rs47959443;rs31572828;rs31567752;rs31561281;rs31559428;rs49959361;rs51348059;rs259230007
chr1_15063.2	chr1:171525091-171525341	Intron (ENSMUST00000043094.12/16429, intron 7 of 7)		Itln1	6.28477	1	78.499	76.6714	80.5792	171041085	170949421	172911308	Significant in baseline	No effect	15	15	12	12	rs48042782	Affy_10351506;rs48042782;rs8242766;rs31555580;rs31557390;rs3722740;rs3705274;rs31218323;rs47959443;rs31572828;rs31567752;rs31561281;rs31559428;rs49959361;rs51348059;rs259230007
chr1_15063.3	chr1:171525341-171525591	Intron (ENSMUST00000043094.12/16429, intron 7 of 7)		Itln1	6.96111	1	78.499	76.6714	80.3248	171041085	170949421	172444585	Significant in baseline	No effect	15	15	12	12	rs48042782	Affy_10351506;rs48042782;rs8242766;rs31555580;rs31557390;rs3722740;rs3705274;rs31218323;rs47959443;rs31572828;rs31567752;rs31561281
chr1_15063.4	chr1:171525591-171525841	Intron (ENSMUST00000043094.12/16429, intron 7 of 7)		Itln1	5.96669	1	78.499	76.6714	80.3248	171041085	170949421	172444585	Significant in baseline	No effect	15	15	12	12	rs48042782	Affy_10351506;rs48042782;rs8242766;rs31555580;rs31557390;rs3722740;rs3705274;rs31218323;rs47959443;rs31572828;rs31567752;rs31561281
chr1_15063.5	chr1:171525841-171526091	Intron (ENSMUST00000043094.12/16429, intron 7 of 7)		Itln1	5.85559	1	78.499	76.6714	80.3248	171041085	170949421	172444585	Significant in baseline	No effect	15	15	12	12	rs48042782	Affy_10351506;rs48042782;rs8242766;rs31555580;rs31557390;rs3722740;rs3705274;rs31218323;rs47959443;rs31572828;rs31567752;rs31561281
chr1_15064.1	chr1:171526485-171526735	Intron (ENSMUST00000043094.12/16429, intron 7 of 7)		Itln1	6.05626	1	78.499	75.5962	80.452	171041085	170535283	172706936	Significant in baseline	Protected effect	15	15	12	12	rs48042782	rs48742671;Affy_10351506;rs48042782;rs8242766;rs31555580;rs31557390;rs3722740;rs3705274;rs31218323;rs47959443;rs31572828;rs31567752;rs31561281;rs31559428;rs49959361
chr1_15064.10	chr1:171528735-171528985	Promoter (2-3kb)		Itln1	6.70132	1	78.499	76.6714	80.5792	171041085	170949421	172911308	Significant in baseline	No effect	15	15	12	12	rs48042782	Affy_10351506;rs48042782;rs8242766;rs31555580;rs31557390;rs3722740;rs3705274;rs31218323;rs47959443;rs31572828;rs31567752;rs31561281;rs31559428;rs49959361;rs51348059;rs259230007
chr1_15064.11	chr1:171528985-171529235	Promoter (2-3kb)		Itln1	6.37867	1	78.499	76.6714	80.3248	171041085	170949421	172444585	Significant in baseline	No effect	15	15	12	12	rs48042782	Affy_10351506;rs48042782;rs8242766;rs31555580;rs31557390;rs3722740;rs3705274;rs31218323;rs47959443;rs31572828;rs31567752;rs31561281
chr1_15064.3	chr1:171526985-171527235	Intron (ENSMUST00000043094.12/16429, intron 7 of 7)		Itln1	6.25894	1	79.303	76.6714	80.5792	171041085	170949421	172911308	Significant in baseline	No effect	17	17	13	13	rs48042782	Affy_10351506;rs48042782;rs8242766;rs31555580;rs31557390;rs3722740;rs3705274;rs31218323;rs47959443;rs31572828;rs31567752;rs31561281;rs31559428;rs49959361;rs51348059;rs259230007
chr1_15064.4	chr1:171527235-171527485	Intron (ENSMUST00000043094.12/16429, intron 7 of 7)		Itln1	7.59156	1	79.303	76.6714	80.452	171041085	170949421	172706936	Significant in baseline	No effect	17	17	13	13	rs48042782	Affy_10351506;rs48042782;rs8242766;rs31555580;rs31557390;rs3722740;rs3705274;rs31218323;rs47959443;rs31572828;rs31567752;rs31561281;rs31559428;rs49959361
chr1_15064.5	chr1:171527485-171527735	Intron (ENSMUST00000043094.12/16429, intron 7 of 7)		Itln1	6.64933	1	78.499	76.6714	80.5792	171041085	170949421	172911308	Significant in baseline	No effect	15	15	12	12	rs48042782	Affy_10351506;rs48042782;rs8242766;rs31555580;rs31557390;rs3722740;rs3705274;rs31218323;rs47959443;rs31572828;rs31567752;rs31561281;rs31559428;rs49959361;rs51348059;rs259230007
chr1_15064.6	chr1:171527735-171527985	Intron (ENSMUST00000043094.12/16429, intron 7 of 7)		Itln1	5.79488	1	78.499	76.6714	80.5792	171041085	170949421	172911308	Significant in baseline	Protected effect	15	15	12	12	rs48042782	Affy_10351506;rs48042782;rs8242766;rs31555580;rs31557390;rs3722740;rs3705274;rs31218323;rs47959443;rs31572828;rs31567752;rs31561281;rs31559428;rs49959361;rs51348059;rs259230007
chr1_15064.7	chr1:171527985-171528235	Intron (ENSMUST00000043094.12/16429, intron 7 of 7)		Itln1	6.65504	1	78.499	76.6714	80.5792	171041085	170949421	172911308	Significant in baseline	No effect	15	15	12	12	rs48042782	Affy_10351506;rs48042782;rs8242766;rs31555580;rs31557390;rs3722740;rs3705274;rs31218323;rs47959443;rs31572828;rs31567752;rs31561281;rs31559428;rs49959361;rs51348059;rs259230007
chr1_15064.8	chr1:171528235-171528485	Intron (ENSMUST00000043094.12/16429, intron 7 of 7)		Itln1	6.85561	1	78.499	76.6714	80.5792	171041085	170949421	172911308	Significant in baseline	No effect	15	15	12	12	rs48042782	Affy_10351506;rs48042782;rs8242766;rs31555580;rs31557390;rs3722740;rs3705274;rs31218323;rs47959443;rs31572828;rs31567752;rs31561281;rs31559428;rs49959361;rs51348059;rs259230007
chr1_15064.9	chr1:171528485-171528735	Promoter (2-3kb)		Itln1	6.87534	1	78.499	76.6714	80.452	171041085	170949421	172706936	Significant in baseline	No effect	15	15	12	12	rs48042782	Affy_10351506;rs48042782;rs8242766;rs31555580;rs31557390;rs3722740;rs3705274;rs31218323;rs47959443;rs31572828;rs31567752;rs31561281;rs31559428;rs49959361
chr1_15065.1	chr1:171529750-171530000	Promoter (1-2kb)		Itln1	5.52973	1	79.303	76.6714	80.5792	171041085	170949421	172911308	Significant in baseline	No effect	17	17	13	13	rs48042782	Affy_10351506;rs48042782;rs8242766;rs31555580;rs31557390;rs3722740;rs3705274;rs31218323;rs47959443;rs31572828;rs31567752;rs31561281;rs31559428;rs49959361;rs51348059;rs259230007
chr1_15066.1	chr1:171530144-171530308	Promoter (1-2kb)		Itln1	6.91275	1	79.303	76.6714	80.3248	171041085	170949421	172444585	Significant in baseline	No effect	17	17	13	13	rs48042782	Affy_10351506;rs48042782;rs8242766;rs31555580;rs31557390;rs3722740;rs3705274;rs31218323;rs47959443;rs31572828;rs31567752;rs31561281
chr1_15067.1	chr1:171530515-171530765	Promoter (<=1kb)		Itln1	6.80539	1	78.499	76.6714	80.452	171041085	170949421	172706936	Significant in baseline	No effect	15	15	12	12	rs48042782	Affy_10351506;rs48042782;rs8242766;rs31555580;rs31557390;rs3722740;rs3705274;rs31218323;rs47959443;rs31572828;rs31567752;rs31561281;rs31559428;rs49959361
chr1_15067.2	chr1:171530765-171531015	Promoter (<=1kb)		Itln1	6.25205	1	78.499	76.6714	80.5792	171041085	170949421	172911308	Significant in baseline	No effect	15	15	12	12	rs48042782	Affy_10351506;rs48042782;rs8242766;rs31555580;rs31557390;rs3722740;rs3705274;rs31218323;rs47959443;rs31572828;rs31567752;rs31561281;rs31559428;rs49959361;rs51348059;rs259230007
chr1_15068.1	chr1:171531227-171531477	Promoter (<=1kb)		Itln1	6.72217	1	79.303	76.6714	80.452	171041085	170949421	172706936	Significant in baseline	No effect	17	17	13	13	rs48042782	Affy_10351506;rs48042782;rs8242766;rs31555580;rs31557390;rs3722740;rs3705274;rs31218323;rs47959443;rs31572828;rs31567752;rs31561281;rs31559428;rs49959361
chr1_15068.2	chr1:171531477-171531727	Promoter (<=1kb)	CTCF-only,CTCF-bound	Itln1	6.12268	1	78.499	76.6714	80.5792	171041085	170949421	172911308	Significant in baseline	No effect	15	15	12	12	rs48042782	Affy_10351506;rs48042782;rs8242766;rs31555580;rs31557390;rs3722740;rs3705274;rs31218323;rs47959443;rs31572828;rs31567752;rs31561281;rs31559428;rs49959361;rs51348059;rs259230007
chr1_15068.3	chr1:171531727-171531977	Promoter (<=1kb)	CTCF-only,CTCF-bound	Itln1	6.04294	1	78.499	76.6714	80.452	171041085	170949421	172706936	Significant in baseline	No effect	15	15	12	12	rs48042782	Affy_10351506;rs48042782;rs8242766;rs31555580;rs31557390;rs3722740;rs3705274;rs31218323;rs47959443;rs31572828;rs31567752;rs31561281;rs31559428;rs49959361
chr1_15068.3	chr1:171531727-171531977	Promoter (<=1kb)	CTCF-only,CTCF-bound	Itln1	3.2458	14	4.94848	2.024	6.02374	19780031	3000000	24000000	Significant in baseline	No effect	23	23	6	6	rs30690390	14P_no_data;rs4230140;rs48403312;rs30643712;rs30642877;rs31187642;rs31042846;rs107630194;rs30677101;rs13482084;rs46327218;rs30464241;rs264848434;rs46878507;rs243237194;rs30675742;rs49868234;rs30461634;rs52350512;rs30771569;rs30688618;rs30690390;D14Mit50;rs30767507;rs31424090;rs30742361;rs30725293;rs3658866;Affy_PC14_25
chr1_15069.1	chr1:171532290-171532540	Promoter (<=1kb)		Itln1	5.49277	1	78.499	76.6714	80.5792	171041085	170949421	172911308	Significant in baseline	No effect	15	15	12	12	rs48042782	Affy_10351506;rs48042782;rs8242766;rs31555580;rs31557390;rs3722740;rs3705274;rs31218323;rs47959443;rs31572828;rs31567752;rs31561281;rs31559428;rs49959361;rs51348059;rs259230007
chr1_15069.2	chr1:171532540-171532790	Promoter (<=1kb)		Itln1	5.59482	1	78.499	76.6714	80.5792	171041085	170949421	172911308	Significant in baseline	No effect	15	15	12	12	rs48042782	Affy_10351506;rs48042782;rs8242766;rs31555580;rs31557390;rs3722740;rs3705274;rs31218323;rs47959443;rs31572828;rs31567752;rs31561281;rs31559428;rs49959361;rs51348059;rs259230007
chr1_15069.3	chr1:171532790-171533040	Promoter (1-2kb)	CTCF-only,CTCF-bound	Itln1	6.27271	1	78.499	76.6714	80.5792	171041085	170949421	172911308	Significant in baseline	Protected effect	15	15	12	12	rs48042782	Affy_10351506;rs48042782;rs8242766;rs31555580;rs31557390;rs3722740;rs3705274;rs31218323;rs47959443;rs31572828;rs31567752;rs31561281;rs31559428;rs49959361;rs51348059;rs259230007
chr1_15070.1	chr1:171533251-171533501	Promoter (1-2kb)		Itln1	5.98935	1	78.499	76.6714	80.5792	171041085	170949421	172911308	Significant in baseline	No effect	15	15	12	12	rs48042782	Affy_10351506;rs48042782;rs8242766;rs31555580;rs31557390;rs3722740;rs3705274;rs31218323;rs47959443;rs31572828;rs31567752;rs31561281;rs31559428;rs49959361;rs51348059;rs259230007
chr1_15070.2	chr1:171533501-171533751	Promoter (1-2kb)		Itln1	6.99868	1	78.499	76.6714	80.5792	171041085	170949421	172911308	Significant in baseline	No effect	15	15	12	12	rs48042782	Affy_10351506;rs48042782;rs8242766;rs31555580;rs31557390;rs3722740;rs3705274;rs31218323;rs47959443;rs31572828;rs31567752;rs31561281;rs31559428;rs49959361;rs51348059;rs259230007
chr1_15071.1	chr1:171534080-171534330	Promoter (<=1kb)		Itln1	6.46858	1	78.499	76.6714	80.5792	171041085	170949421	172911308	Significant in baseline	No effect	15	15	12	12	rs48042782	Affy_10351506;rs48042782;rs8242766;rs31555580;rs31557390;rs3722740;rs3705274;rs31218323;rs47959443;rs31572828;rs31567752;rs31561281;rs31559428;rs49959361;rs51348059;rs259230007
chr1_15071.2	chr1:171534330-171534580	Promoter (<=1kb)		Itln1	5.74638	1	78.499	76.6714	80.452	171041085	170949421	172706936	Significant in baseline	Protected effect	15	15	12	12	rs48042782	Affy_10351506;rs48042782;rs8242766;rs31555580;rs31557390;rs3722740;rs3705274;rs31218323;rs47959443;rs31572828;rs31567752;rs31561281;rs31559428;rs49959361
chr1_15071.3	chr1:171534580-171534830	Promoter (<=1kb)		Itln1	6.92476	1	79.303	76.6714	80.3248	171041085	170949421	172444585	Significant in baseline	No effect	17	17	13	13	rs48042782	Affy_10351506;rs48042782;rs8242766;rs31555580;rs31557390;rs3722740;rs3705274;rs31218323;rs47959443;rs31572828;rs31567752;rs31561281
chr1_15072.1	chr1:171535150-171535400	Promoter (<=1kb)		Itln1	6.64207	1	78.499	76.6714	80.452	171041085	170949421	172706936	Significant in baseline	Protected effect	15	15	12	12	rs48042782	Affy_10351506;rs48042782;rs8242766;rs31555580;rs31557390;rs3722740;rs3705274;rs31218323;rs47959443;rs31572828;rs31567752;rs31561281;rs31559428;rs49959361
chr1_15072.2	chr1:171535400-171535650	Promoter (<=1kb)		Itln1	6.65383	1	79.303	76.6714	80.452	171041085	170949421	172706936	Significant in baseline	Protected effect	17	17	13	13	rs48042782	Affy_10351506;rs48042782;rs8242766;rs31555580;rs31557390;rs3722740;rs3705274;rs31218323;rs47959443;rs31572828;rs31567752;rs31561281;rs31559428;rs49959361
chr1_15073.1	chr1:171537552-171537802	Promoter (2-3kb)		Itln1	4.98849	1	79.303	76.6714	81.2213	171041085	170949421	173645553	Significant in baseline	No effect	17	17	13	13	rs48042782	Affy_10351506;rs48042782;rs8242766;rs31555580;rs31557390;rs3722740;rs3705274;rs31218323;rs47959443;rs31572828;rs31567752;rs31561281;rs31559428;rs49959361;rs51348059;rs259230007;rs31612847;rs31608155;rs31405208;rs46128598;rs31590468;rs31587587
chr1_15073.1	chr1:171537552-171537802	Promoter (2-3kb)		Itln1	3.82914	14	2.53682	2.024	6.02374	9546676	3000000	24000000	Significant in baseline	No effect	24	24	7	7	rs30642877	14P_no_data;rs4230140;rs48403312;rs30643712;rs30642877;rs31187642;rs31042846;rs107630194;rs30677101;rs13482084;rs46327218;rs30464241;rs264848434;rs46878507;rs243237194;rs30675742;rs49868234;rs30461634;rs52350512;rs30771569;rs30688618;rs30690390;D14Mit50;rs30767507;rs31424090;rs30742361;rs30725293;rs3658866;Affy_PC14_25
chr1_15073.2	chr1:171537802-171538052	Promoter (2-3kb)		Itln1	5.8825	1	78.499	76.6714	80.452	171041085	170949421	172706936	Significant in baseline	No effect	15	15	12	12	rs48042782	Affy_10351506;rs48042782;rs8242766;rs31555580;rs31557390;rs3722740;rs3705274;rs31218323;rs47959443;rs31572828;rs31567752;rs31561281;rs31559428;rs49959361
chr1_15073.3	chr1:171538052-171538302	Promoter (2-3kb)		Itln1	6.11686	1	78.499	76.6714	80.5792	171041085	170949421	172911308	Significant in baseline	Protected effect	15	15	12	12	rs48042782	Affy_10351506;rs48042782;rs8242766;rs31555580;rs31557390;rs3722740;rs3705274;rs31218323;rs47959443;rs31572828;rs31567752;rs31561281;rs31559428;rs49959361;rs51348059;rs259230007
chr1_15073.4	chr1:171538302-171538552	Distal Intergenic		Itln1	6.378	1	78.499	76.6714	80.452	171041085	170949421	172706936	Significant in baseline	No effect	15	15	12	12	rs48042782	Affy_10351506;rs48042782;rs8242766;rs31555580;rs31557390;rs3722740;rs3705274;rs31218323;rs47959443;rs31572828;rs31567752;rs31561281;rs31559428;rs49959361
chr1_15073.5	chr1:171538552-171538802	Distal Intergenic		Itln1	7.07947	1	79.303	76.6714	80.3248	171041085	170949421	172444585	Significant in baseline	Protected effect	17	17	13	13	rs48042782	Affy_10351506;rs48042782;rs8242766;rs31555580;rs31557390;rs3722740;rs3705274;rs31218323;rs47959443;rs31572828;rs31567752;rs31561281
chr1_15073.6	chr1:171538802-171539052	Distal Intergenic		Itln1	6.73584	1	78.499	76.6714	80.452	171041085	170949421	172706936	Significant in baseline	No effect	15	15	12	12	rs48042782	Affy_10351506;rs48042782;rs8242766;rs31555580;rs31557390;rs3722740;rs3705274;rs31218323;rs47959443;rs31572828;rs31567752;rs31561281;rs31559428;rs49959361
chr1_15074.1	chr1:171540191-171540441	Distal Intergenic		Itln1	7.01153	1	79.303	76.6714	80.3248	171041085	170949421	172444585	Significant in baseline	No effect	17	17	13	13	rs48042782	Affy_10351506;rs48042782;rs8242766;rs31555580;rs31557390;rs3722740;rs3705274;rs31218323;rs47959443;rs31572828;rs31567752;rs31561281
chr1_15074.2	chr1:171540441-171540691	Distal Intergenic		Itln1	7.38714	1	79.303	76.6714	80.3248	171041085	170949421	172444585	Significant in baseline	No effect	17	17	13	13	rs48042782	Affy_10351506;rs48042782;rs8242766;rs31555580;rs31557390;rs3722740;rs3705274;rs31218323;rs47959443;rs31572828;rs31567752;rs31561281
chr1_15074.3	chr1:171540691-171540941	Distal Intergenic		Itln1	6.44721	1	79.303	76.6714	80.452	171041085	170949421	172706936	Significant in baseline	No effect	17	17	13	13	rs48042782	Affy_10351506;rs48042782;rs8242766;rs31555580;rs31557390;rs3722740;rs3705274;rs31218323;rs47959443;rs31572828;rs31567752;rs31561281;rs31559428;rs49959361
chr1_15075.1	chr1:171541177-171541427	Distal Intergenic		Itln1	6.47901	1	78.499	76.6714	80.5792	171041085	170949421	172911308	Significant in baseline	No effect	15	15	12	12	rs48042782	Affy_10351506;rs48042782;rs8242766;rs31555580;rs31557390;rs3722740;rs3705274;rs31218323;rs47959443;rs31572828;rs31567752;rs31561281;rs31559428;rs49959361;rs51348059;rs259230007
chr1_15075.2	chr1:171541427-171541677	Distal Intergenic		Itln1	6.23219	1	78.499	76.6714	80.5792	171041085	170949421	172911308	Significant in baseline	No effect	15	15	12	12	rs48042782	Affy_10351506;rs48042782;rs8242766;rs31555580;rs31557390;rs3722740;rs3705274;rs31218323;rs47959443;rs31572828;rs31567752;rs31561281;rs31559428;rs49959361;rs51348059;rs259230007
chr1_15076.1	chr1:171542312-171542562	Distal Intergenic		Itln1	6.18576	1	78.499	76.6714	80.452	171041085	170949421	172706936	Significant in baseline	No effect	15	15	12	12	rs48042782	Affy_10351506;rs48042782;rs8242766;rs31555580;rs31557390;rs3722740;rs3705274;rs31218323;rs47959443;rs31572828;rs31567752;rs31561281;rs31559428;rs49959361
chr1_15076.1	chr1:171542312-171542562	Distal Intergenic		Itln1	3.30823	14	2.53682	2.024	6.02374	9546676	3000000	24000000	Significant in baseline	No effect	24	24	7	7	rs30642877	14P_no_data;rs4230140;rs48403312;rs30643712;rs30642877;rs31187642;rs31042846;rs107630194;rs30677101;rs13482084;rs46327218;rs30464241;rs264848434;rs46878507;rs243237194;rs30675742;rs49868234;rs30461634;rs52350512;rs30771569;rs30688618;rs30690390;D14Mit50;rs30767507;rs31424090;rs30742361;rs30725293;rs3658866;Affy_PC14_25
chr1_15076.2	chr1:171542562-171542812	Distal Intergenic		Itln1	6.71764	1	78.499	76.6714	80.5792	171041085	170949421	172911308	Significant in baseline	Protected effect	15	15	12	12	rs48042782	Affy_10351506;rs48042782;rs8242766;rs31555580;rs31557390;rs3722740;rs3705274;rs31218323;rs47959443;rs31572828;rs31567752;rs31561281;rs31559428;rs49959361;rs51348059;rs259230007
chr1_15076.2	chr1:171542562-171542812	Distal Intergenic		Itln1	3.16001	14	4.56088	2.024	6.02374	19755208	3000000	24000000	Significant in baseline	No effect	23	23	6	6	rs30688618	14P_no_data;rs4230140;rs48403312;rs30643712;rs30642877;rs31187642;rs31042846;rs107630194;rs30677101;rs13482084;rs46327218;rs30464241;rs264848434;rs46878507;rs243237194;rs30675742;rs49868234;rs30461634;rs52350512;rs30771569;rs30688618;rs30690390;D14Mit50;rs30767507;rs31424090;rs30742361;rs30725293;rs3658866;Affy_PC14_25
chr1_15077.1	chr1:171543598-171543848	Distal Intergenic		Itln1	5.81003	1	78.499	76.6714	80.5792	171041085	170949421	172911308	Significant in baseline	Protected effect	15	15	12	12	rs48042782	Affy_10351506;rs48042782;rs8242766;rs31555580;rs31557390;rs3722740;rs3705274;rs31218323;rs47959443;rs31572828;rs31567752;rs31561281;rs31559428;rs49959361;rs51348059;rs259230007
chr1_15078.1	chr1:171544343-171544593	Distal Intergenic		Itln1	6.50401	1	78.499	76.6714	80.3248	171041085	170949421	172444585	Significant in baseline	No effect	15	15	12	12	rs48042782	Affy_10351506;rs48042782;rs8242766;rs31555580;rs31557390;rs3722740;rs3705274;rs31218323;rs47959443;rs31572828;rs31567752;rs31561281
chr1_15079.1	chr1:171545128-171545378	Distal Intergenic		Itln1	7.45937	1	79.303	76.6714	80.3248	171041085	170949421	172444585	Significant in baseline	No effect	17	17	13	13	rs48042782	Affy_10351506;rs48042782;rs8242766;rs31555580;rs31557390;rs3722740;rs3705274;rs31218323;rs47959443;rs31572828;rs31567752;rs31561281
chr1_15079.2	chr1:171545378-171545628	Distal Intergenic		Itln1	6.66549	1	78.499	76.6714	80.5792	171041085	170949421	172911308	Significant in baseline	No effect	15	15	12	12	rs48042782	Affy_10351506;rs48042782;rs8242766;rs31555580;rs31557390;rs3722740;rs3705274;rs31218323;rs47959443;rs31572828;rs31567752;rs31561281;rs31559428;rs49959361;rs51348059;rs259230007
chr1_15079.3	chr1:171545628-171545878	Distal Intergenic		Itln1	6.23653	1	78.499	76.6714	80.5792	171041085	170949421	172911308	Significant in baseline	No effect	15	15	12	12	rs48042782	Affy_10351506;rs48042782;rs8242766;rs31555580;rs31557390;rs3722740;rs3705274;rs31218323;rs47959443;rs31572828;rs31567752;rs31561281;rs31559428;rs49959361;rs51348059;rs259230007
chr1_15079.4	chr1:171545878-171546128	Distal Intergenic		Itln1	6.69768	1	79.303	76.6714	80.3248	171041085	170949421	172444585	Significant in baseline	No effect	17	17	13	13	rs48042782	Affy_10351506;rs48042782;rs8242766;rs31555580;rs31557390;rs3722740;rs3705274;rs31218323;rs47959443;rs31572828;rs31567752;rs31561281
chr1_15080.1	chr1:171546413-171546663	Distal Intergenic		Itln1	5.18395	1	78.499	76.6714	80.3248	171041085	170949421	172444585	Significant in baseline	No effect	15	15	12	12	rs48042782	Affy_10351506;rs48042782;rs8242766;rs31555580;rs31557390;rs3722740;rs3705274;rs31218323;rs47959443;rs31572828;rs31567752;rs31561281
chr1_15080.2	chr1:171546663-171546913	Distal Intergenic		Itln1	6.52958	1	79.303	76.6714	80.452	171041085	170949421	172706936	Significant in baseline	No effect	17	17	13	13	rs48042782	Affy_10351506;rs48042782;rs8242766;rs31555580;rs31557390;rs3722740;rs3705274;rs31218323;rs47959443;rs31572828;rs31567752;rs31561281;rs31559428;rs49959361
chr1_15081.1	chr1:171547289-171547539	Distal Intergenic		Cd244a	7.12436	1	78.499	76.6714	80.452	171041085	170949421	172706936	Significant in baseline	No effect	15	15	12	12	rs48042782	Affy_10351506;rs48042782;rs8242766;rs31555580;rs31557390;rs3722740;rs3705274;rs31218323;rs47959443;rs31572828;rs31567752;rs31561281;rs31559428;rs49959361
chr1_15081.2	chr1:171547539-171547789	Distal Intergenic		Cd244a	6.63719	1	79.303	76.6714	80.452	171041085	170949421	172706936	Significant in baseline	Protected effect	17	17	13	13	rs48042782	Affy_10351506;rs48042782;rs8242766;rs31555580;rs31557390;rs3722740;rs3705274;rs31218323;rs47959443;rs31572828;rs31567752;rs31561281;rs31559428;rs49959361
chr1_15082.1	chr1:171548167-171548417	Distal Intergenic		Cd244a	6.33595	1	79.303	76.6714	80.452	171041085	170949421	172706936	Significant in baseline	No effect	17	17	13	13	rs48042782	Affy_10351506;rs48042782;rs8242766;rs31555580;rs31557390;rs3722740;rs3705274;rs31218323;rs47959443;rs31572828;rs31567752;rs31561281;rs31559428;rs49959361
chr1_15082.2	chr1:171548417-171548667	Distal Intergenic		Cd244a	6.67297	1	78.499	76.6714	80.452	171041085	170949421	172706936	Significant in baseline	No effect	15	15	12	12	rs48042782	Affy_10351506;rs48042782;rs8242766;rs31555580;rs31557390;rs3722740;rs3705274;rs31218323;rs47959443;rs31572828;rs31567752;rs31561281;rs31559428;rs49959361
chr1_15082.3	chr1:171548667-171548917	Distal Intergenic		Cd244a	6.8857	1	78.499	76.6714	80.452	171041085	170949421	172706936	Significant in baseline	No effect	15	15	12	12	rs48042782	Affy_10351506;rs48042782;rs8242766;rs31555580;rs31557390;rs3722740;rs3705274;rs31218323;rs47959443;rs31572828;rs31567752;rs31561281;rs31559428;rs49959361
chr1_15082.4	chr1:171548917-171549167	Distal Intergenic		Cd244a	4.9368	1	78.499	75.5962	83.4858	171041085	170535283	179862838	Significant in baseline	No effect	15	15	12	12	rs48042782	rs48742671;Affy_10351506;rs48042782;rs8242766;rs31555580;rs31557390;rs3722740;rs3705274;rs31218323;rs47959443;rs31572828;rs31567752;rs31561281;rs31559428;rs49959361;rs51348059;rs259230007;rs31612847;rs31608155;rs31405208;rs46128598;rs31590468;rs31587587;rs31584856;rs3682996;rs3669108;rs6375522;rs4136041;rs31329176;rs31420065;rs32559774;Affy_10352113;Affy_4563273;rs30712622
chr1_15082.5	chr1:171549167-171549417	Distal Intergenic		Cd244a	5.92248	1	79.303	76.6714	80.452	171041085	170949421	172706936	Significant in baseline	No effect	17	17	13	13	rs48042782	Affy_10351506;rs48042782;rs8242766;rs31555580;rs31557390;rs3722740;rs3705274;rs31218323;rs47959443;rs31572828;rs31567752;rs31561281;rs31559428;rs49959361
chr1_15082.6	chr1:171549417-171549667	Distal Intergenic		Cd244a	5.63026	1	78.499	76.6714	80.5792	171041085	170949421	172911308	Significant in baseline	No effect	15	15	12	12	rs48042782	Affy_10351506;rs48042782;rs8242766;rs31555580;rs31557390;rs3722740;rs3705274;rs31218323;rs47959443;rs31572828;rs31567752;rs31561281;rs31559428;rs49959361;rs51348059;rs259230007
chr1_15083.1	chr1:171550936-171551186	Distal Intergenic		Cd244a	5.69499	1	79.303	76.6714	80.5792	171041085	170949421	172911308	Significant in baseline	No effect	17	17	13	13	rs48042782	Affy_10351506;rs48042782;rs8242766;rs31555580;rs31557390;rs3722740;rs3705274;rs31218323;rs47959443;rs31572828;rs31567752;rs31561281;rs31559428;rs49959361;rs51348059;rs259230007
chr1_15083.2	chr1:171551186-171551436	Distal Intergenic		Cd244a	6.46836	1	79.303	76.6714	80.452	171041085	170949421	172706936	Significant in baseline	No effect	17	17	13	13	rs48042782	Affy_10351506;rs48042782;rs8242766;rs31555580;rs31557390;rs3722740;rs3705274;rs31218323;rs47959443;rs31572828;rs31567752;rs31561281;rs31559428;rs49959361
chr1_15083.3	chr1:171551436-171551686	Distal Intergenic	pELS	Cd244a	6.6387	1	79.303	76.6714	80.452	171041085	170949421	172706936	Significant in baseline	Protected effect	17	17	13	13	rs48042782	Affy_10351506;rs48042782;rs8242766;rs31555580;rs31557390;rs3722740;rs3705274;rs31218323;rs47959443;rs31572828;rs31567752;rs31561281;rs31559428;rs49959361
chr1_15083.4	chr1:171551686-171551936	Distal Intergenic		Cd244a	6.39596	1	79.303	76.6714	80.452	171041085	170949421	172706936	Significant in baseline	No effect	17	17	13	13	rs48042782	Affy_10351506;rs48042782;rs8242766;rs31555580;rs31557390;rs3722740;rs3705274;rs31218323;rs47959443;rs31572828;rs31567752;rs31561281;rs31559428;rs49959361
chr1_15083.5	chr1:171551936-171552186	Distal Intergenic		Cd244a	6.45754	1	78.499	76.6714	80.5792	171041085	170949421	172911308	Significant in baseline	Protected effect	15	15	12	12	rs48042782	Affy_10351506;rs48042782;rs8242766;rs31555580;rs31557390;rs3722740;rs3705274;rs31218323;rs47959443;rs31572828;rs31567752;rs31561281;rs31559428;rs49959361;rs51348059;rs259230007
chr1_15083.6	chr1:171552186-171552436	Distal Intergenic		Cd244a	7.37445	1	78.499	76.6714	80.452	171041085	170949421	172706936	Significant in baseline	No effect	15	15	12	12	rs48042782	Affy_10351506;rs48042782;rs8242766;rs31555580;rs31557390;rs3722740;rs3705274;rs31218323;rs47959443;rs31572828;rs31567752;rs31561281;rs31559428;rs49959361
chr1_15083.7	chr1:171552436-171552686	Distal Intergenic		Cd244a	7.77494	1	79.303	76.6714	80.3248	171041085	170949421	172444585	Significant in baseline	No effect	17	17	13	13	rs48042782	Affy_10351506;rs48042782;rs8242766;rs31555580;rs31557390;rs3722740;rs3705274;rs31218323;rs47959443;rs31572828;rs31567752;rs31561281
chr1_15084.1	chr1:171553423-171553673	Distal Intergenic	pELS	Cd244a	7.21989	1	79.303	76.6714	80.452	171041085	170949421	172706936	Significant in baseline	No effect	17	17	13	13	rs48042782	Affy_10351506;rs48042782;rs8242766;rs31555580;rs31557390;rs3722740;rs3705274;rs31218323;rs47959443;rs31572828;rs31567752;rs31561281;rs31559428;rs49959361
chr1_15084.2	chr1:171553673-171553923	Distal Intergenic	pELS	Cd244a	7.15581	1	79.303	76.6714	80.3248	171041085	170949421	172444585	Significant in baseline	No effect	17	17	13	13	rs48042782	Affy_10351506;rs48042782;rs8242766;rs31555580;rs31557390;rs3722740;rs3705274;rs31218323;rs47959443;rs31572828;rs31567752;rs31561281
chr1_15084.3	chr1:171553923-171554173	Distal Intergenic		Cd244a	6.94539	1	79.303	76.6714	80.452	171041085	170949421	172706936	Significant in baseline	No effect	17	17	13	13	rs48042782	Affy_10351506;rs48042782;rs8242766;rs31555580;rs31557390;rs3722740;rs3705274;rs31218323;rs47959443;rs31572828;rs31567752;rs31561281;rs31559428;rs49959361
chr1_15085.1	chr1:171554491-171554741	Distal Intergenic		Cd244a	6.42397	1	78.499	76.6714	80.5792	171041085	170949421	172911308	Significant in baseline	No effect	15	15	12	12	rs48042782	Affy_10351506;rs48042782;rs8242766;rs31555580;rs31557390;rs3722740;rs3705274;rs31218323;rs47959443;rs31572828;rs31567752;rs31561281;rs31559428;rs49959361;rs51348059;rs259230007
chr1_15085.2	chr1:171554741-171554991	Distal Intergenic		Cd244a	6.35779	1	78.499	76.6714	80.452	171041085	170949421	172706936	Significant in baseline	No effect	15	15	12	12	rs48042782	Affy_10351506;rs48042782;rs8242766;rs31555580;rs31557390;rs3722740;rs3705274;rs31218323;rs47959443;rs31572828;rs31567752;rs31561281;rs31559428;rs49959361
chr1_15086.1	chr1:171555220-171555470	Distal Intergenic		Cd244a	6.49541	1	78.499	76.6714	80.5792	171041085	170949421	172911308	Significant in baseline	No effect	15	15	12	12	rs48042782	Affy_10351506;rs48042782;rs8242766;rs31555580;rs31557390;rs3722740;rs3705274;rs31218323;rs47959443;rs31572828;rs31567752;rs31561281;rs31559428;rs49959361;rs51348059;rs259230007
chr1_15086.2	chr1:171555470-171555720	Distal Intergenic		Cd244a	6.79944	1	78.499	76.6714	80.452	171041085	170949421	172706936	Significant in baseline	Protected effect	15	15	12	12	rs48042782	Affy_10351506;rs48042782;rs8242766;rs31555580;rs31557390;rs3722740;rs3705274;rs31218323;rs47959443;rs31572828;rs31567752;rs31561281;rs31559428;rs49959361
chr1_15086.3	chr1:171555720-171555970	Distal Intergenic		Cd244a	6.33149	1	78.499	76.6714	80.5792	171041085	170949421	172911308	Significant in baseline	No effect	15	15	12	12	rs48042782	Affy_10351506;rs48042782;rs8242766;rs31555580;rs31557390;rs3722740;rs3705274;rs31218323;rs47959443;rs31572828;rs31567752;rs31561281;rs31559428;rs49959361;rs51348059;rs259230007
chr1_15086.4	chr1:171555970-171556220	Promoter (2-3kb)		Cd244a	6.95492	1	78.499	76.6714	80.452	171041085	170949421	172706936	Significant in baseline	No effect	15	15	12	12	rs48042782	Affy_10351506;rs48042782;rs8242766;rs31555580;rs31557390;rs3722740;rs3705274;rs31218323;rs47959443;rs31572828;rs31567752;rs31561281;rs31559428;rs49959361
chr1_15086.5	chr1:171556220-171556470	Promoter (2-3kb)		Cd244a	6.35484	1	79.303	76.6714	80.452	171041085	170949421	172706936	Significant in baseline	Protected effect	17	17	13	13	rs48042782	Affy_10351506;rs48042782;rs8242766;rs31555580;rs31557390;rs3722740;rs3705274;rs31218323;rs47959443;rs31572828;rs31567752;rs31561281;rs31559428;rs49959361
chr1_15086.6	chr1:171556470-171556720	Promoter (2-3kb)		Cd244a	6.98113	1	78.499	76.6714	80.452	171041085	170949421	172706936	Significant in baseline	No effect	15	15	12	12	rs48042782	Affy_10351506;rs48042782;rs8242766;rs31555580;rs31557390;rs3722740;rs3705274;rs31218323;rs47959443;rs31572828;rs31567752;rs31561281;rs31559428;rs49959361
chr1_15087.1	chr1:171557846-171558096	Promoter (1-2kb)		Cd244a	7.46367	1	78.499	76.6714	80.3248	171041085	170949421	172444585	Significant in baseline	No effect	15	15	12	12	rs48042782	Affy_10351506;rs48042782;rs8242766;rs31555580;rs31557390;rs3722740;rs3705274;rs31218323;rs47959443;rs31572828;rs31567752;rs31561281
chr1_15087.10	chr1:171560096-171560346	Promoter (<=1kb)		Cd244a	6.31951	1	78.499	76.6714	80.5792	171041085	170949421	172911308	Significant in baseline	No effect	15	15	12	12	rs48042782	Affy_10351506;rs48042782;rs8242766;rs31555580;rs31557390;rs3722740;rs3705274;rs31218323;rs47959443;rs31572828;rs31567752;rs31561281;rs31559428;rs49959361;rs51348059;rs259230007
chr1_15087.11	chr1:171560346-171560596	Promoter (1-2kb)	pELS	Cd244a	7.13207	1	78.499	76.6714	80.5792	171041085	170949421	172911308	Significant in baseline	No effect	15	15	12	12	rs48042782	Affy_10351506;rs48042782;rs8242766;rs31555580;rs31557390;rs3722740;rs3705274;rs31218323;rs47959443;rs31572828;rs31567752;rs31561281;rs31559428;rs49959361;rs51348059;rs259230007
chr1_15087.12	chr1:171560596-171560846	Promoter (1-2kb)	pELS	Cd244a	6.7917	1	78.499	76.6714	80.5792	171041085	170949421	172911308	Significant in baseline	No effect	15	15	12	12	rs48042782	Affy_10351506;rs48042782;rs8242766;rs31555580;rs31557390;rs3722740;rs3705274;rs31218323;rs47959443;rs31572828;rs31567752;rs31561281;rs31559428;rs49959361;rs51348059;rs259230007
chr1_15087.13	chr1:171560846-171561096	Promoter (1-2kb)		Cd244a	6.62218	1	79.303	76.6714	80.3248	171041085	170949421	172444585	Significant in baseline	No effect	17	17	13	13	rs48042782	Affy_10351506;rs48042782;rs8242766;rs31555580;rs31557390;rs3722740;rs3705274;rs31218323;rs47959443;rs31572828;rs31567752;rs31561281
chr1_15087.14	chr1:171561096-171561346	Promoter (1-2kb)		Cd244a	6.35663	1	79.303	76.6714	80.452	171041085	170949421	172706936	Significant in baseline	No effect	17	17	13	13	rs48042782	Affy_10351506;rs48042782;rs8242766;rs31555580;rs31557390;rs3722740;rs3705274;rs31218323;rs47959443;rs31572828;rs31567752;rs31561281;rs31559428;rs49959361
chr1_15087.15	chr1:171561346-171561596	Promoter (2-3kb)		Cd244a	6.45301	1	78.499	76.6714	80.5792	171041085	170949421	172911308	Significant in baseline	No effect	15	15	12	12	rs48042782	Affy_10351506;rs48042782;rs8242766;rs31555580;rs31557390;rs3722740;rs3705274;rs31218323;rs47959443;rs31572828;rs31567752;rs31561281;rs31559428;rs49959361;rs51348059;rs259230007
chr1_15087.16	chr1:171561596-171561846	Promoter (2-3kb)		Cd244a	6.56785	1	78.499	76.6714	80.5792	171041085	170949421	172911308	Significant in baseline	No effect	15	15	12	12	rs48042782	Affy_10351506;rs48042782;rs8242766;rs31555580;rs31557390;rs3722740;rs3705274;rs31218323;rs47959443;rs31572828;rs31567752;rs31561281;rs31559428;rs49959361;rs51348059;rs259230007
chr1_15087.17	chr1:171561846-171562096	Promoter (2-3kb)		Cd244a	7.14379	1	78.499	76.6714	80.452	171041085	170949421	172706936	Significant in baseline	No effect	15	15	12	12	rs48042782	Affy_10351506;rs48042782;rs8242766;rs31555580;rs31557390;rs3722740;rs3705274;rs31218323;rs47959443;rs31572828;rs31567752;rs31561281;rs31559428;rs49959361
chr1_15087.18	chr1:171562096-171562346	Promoter (2-3kb)		Cd244a	6.06599	1	78.499	76.6714	80.452	171041085	170949421	172706936	Significant in baseline	No effect	15	15	12	12	rs48042782	Affy_10351506;rs48042782;rs8242766;rs31555580;rs31557390;rs3722740;rs3705274;rs31218323;rs47959443;rs31572828;rs31567752;rs31561281;rs31559428;rs49959361
chr1_15087.19	chr1:171562346-171562596	Intron (ENSMUST00000004829.12/18106, intron 1 of 8)		Cd244a	6.46259	1	78.499	76.6714	80.3248	171041085	170949421	172444585	Significant in baseline	No effect	15	15	12	12	rs48042782	Affy_10351506;rs48042782;rs8242766;rs31555580;rs31557390;rs3722740;rs3705274;rs31218323;rs47959443;rs31572828;rs31567752;rs31561281
chr1_15087.2	chr1:171558096-171558346	Promoter (<=1kb)		Cd244a	6.63623	1	79.303	76.6714	80.452	171041085	170949421	172706936	Significant in baseline	No effect	17	17	13	13	rs48042782	Affy_10351506;rs48042782;rs8242766;rs31555580;rs31557390;rs3722740;rs3705274;rs31218323;rs47959443;rs31572828;rs31567752;rs31561281;rs31559428;rs49959361
chr1_15087.20	chr1:171562596-171562846	Intron (ENSMUST00000004829.12/18106, intron 1 of 8)		Cd244a	6.66248	1	78.499	76.6714	80.5792	171041085	170949421	172911308	Significant in baseline	No effect	15	15	12	12	rs48042782	Affy_10351506;rs48042782;rs8242766;rs31555580;rs31557390;rs3722740;rs3705274;rs31218323;rs47959443;rs31572828;rs31567752;rs31561281;rs31559428;rs49959361;rs51348059;rs259230007
chr1_15087.21	chr1:171562846-171563096	Intron (ENSMUST00000004829.12/18106, intron 1 of 8)		Cd244a	6.60895	1	78.499	76.6714	80.5792	171041085	170949421	172911308	Significant in baseline	No effect	15	15	12	12	rs48042782	Affy_10351506;rs48042782;rs8242766;rs31555580;rs31557390;rs3722740;rs3705274;rs31218323;rs47959443;rs31572828;rs31567752;rs31561281;rs31559428;rs49959361;rs51348059;rs259230007
chr1_15087.22	chr1:171563096-171563346	Intron (ENSMUST00000004829.12/18106, intron 1 of 8)		Cd244a	6.70974	1	79.303	76.6714	80.452	171041085	170949421	172706936	Significant in baseline	No effect	17	17	13	13	rs48042782	Affy_10351506;rs48042782;rs8242766;rs31555580;rs31557390;rs3722740;rs3705274;rs31218323;rs47959443;rs31572828;rs31567752;rs31561281;rs31559428;rs49959361
chr1_15087.23	chr1:171563346-171563596	Intron (ENSMUST00000004829.12/18106, intron 1 of 8)		Cd244a	5.99999	1	78.499	76.6714	80.5792	171041085	170949421	172911308	Significant in baseline	No effect	15	15	12	12	rs48042782	Affy_10351506;rs48042782;rs8242766;rs31555580;rs31557390;rs3722740;rs3705274;rs31218323;rs47959443;rs31572828;rs31567752;rs31561281;rs31559428;rs49959361;rs51348059;rs259230007
chr1_15087.24	chr1:171563596-171563846	Intron (ENSMUST00000004829.12/18106, intron 1 of 8)		Cd244a	6.30137	1	79.303	76.6714	80.452	171041085	170949421	172706936	Significant in baseline	No effect	17	17	13	13	rs48042782	Affy_10351506;rs48042782;rs8242766;rs31555580;rs31557390;rs3722740;rs3705274;rs31218323;rs47959443;rs31572828;rs31567752;rs31561281;rs31559428;rs49959361
chr1_15087.25	chr1:171563846-171564096	Intron (ENSMUST00000004829.12/18106, intron 1 of 8)		Cd244a	6.2459	1	78.499	76.6714	80.5792	171041085	170949421	172911308	Significant in baseline	No effect	15	15	12	12	rs48042782	Affy_10351506;rs48042782;rs8242766;rs31555580;rs31557390;rs3722740;rs3705274;rs31218323;rs47959443;rs31572828;rs31567752;rs31561281;rs31559428;rs49959361;rs51348059;rs259230007
chr1_15087.26	chr1:171564096-171564346	Intron (ENSMUST00000004829.12/18106, intron 1 of 8)		Cd244a	7.10718	1	78.499	76.6714	80.452	171041085	170949421	172706936	Significant in baseline	No effect	15	15	12	12	rs48042782	Affy_10351506;rs48042782;rs8242766;rs31555580;rs31557390;rs3722740;rs3705274;rs31218323;rs47959443;rs31572828;rs31567752;rs31561281;rs31559428;rs49959361
chr1_15087.27	chr1:171564346-171564596	Intron (ENSMUST00000004829.12/18106, intron 1 of 8)	CTCF-only,CTCF-bound	Cd244a	7.2318	1	79.303	76.6714	80.3248	171041085	170949421	172444585	Significant in baseline	No effect	17	17	13	13	rs48042782	Affy_10351506;rs48042782;rs8242766;rs31555580;rs31557390;rs3722740;rs3705274;rs31218323;rs47959443;rs31572828;rs31567752;rs31561281
chr1_15087.28	chr1:171564596-171564846	Intron (ENSMUST00000004829.12/18106, intron 1 of 8)		Cd244a	6.68224	1	79.303	76.6714	80.3248	171041085	170949421	172444585	Significant in baseline	No effect	17	17	13	13	rs48042782	Affy_10351506;rs48042782;rs8242766;rs31555580;rs31557390;rs3722740;rs3705274;rs31218323;rs47959443;rs31572828;rs31567752;rs31561281
chr1_15087.3	chr1:171558346-171558596	Promoter (<=1kb)		Cd244a	5.83417	1	78.499	76.6714	80.5792	171041085	170949421	172911308	Significant in baseline	No effect	15	15	12	12	rs48042782	Affy_10351506;rs48042782;rs8242766;rs31555580;rs31557390;rs3722740;rs3705274;rs31218323;rs47959443;rs31572828;rs31567752;rs31561281;rs31559428;rs49959361;rs51348059;rs259230007
chr1_15087.30	chr1:171565096-171565346	Intron (ENSMUST00000004829.12/18106, intron 1 of 8)		Cd244a	6.74252	1	79.303	76.6714	80.452	171041085	170949421	172706936	Significant in baseline	No effect	17	17	13	13	rs48042782	Affy_10351506;rs48042782;rs8242766;rs31555580;rs31557390;rs3722740;rs3705274;rs31218323;rs47959443;rs31572828;rs31567752;rs31561281;rs31559428;rs49959361
chr1_15087.31	chr1:171565346-171565596	Intron (ENSMUST00000004829.12/18106, intron 1 of 8)		Cd244a	6.04537	1	78.499	76.6714	80.5792	171041085	170949421	172911308	Significant in baseline	No effect	15	15	12	12	rs48042782	Affy_10351506;rs48042782;rs8242766;rs31555580;rs31557390;rs3722740;rs3705274;rs31218323;rs47959443;rs31572828;rs31567752;rs31561281;rs31559428;rs49959361;rs51348059;rs259230007
chr1_15087.32	chr1:171565596-171565846	Intron (ENSMUST00000004829.12/18106, intron 1 of 8)		Cd244a	6.39125	1	78.499	76.6714	80.5792	171041085	170949421	172911308	Significant in baseline	No effect	15	15	12	12	rs48042782	Affy_10351506;rs48042782;rs8242766;rs31555580;rs31557390;rs3722740;rs3705274;rs31218323;rs47959443;rs31572828;rs31567752;rs31561281;rs31559428;rs49959361;rs51348059;rs259230007
chr1_15087.33	chr1:171565846-171566096	Intron (ENSMUST00000004829.12/18106, intron 1 of 8)		Cd244a	6.76119	1	78.499	76.6714	80.452	171041085	170949421	172706936	Significant in baseline	No effect	15	15	12	12	rs48042782	Affy_10351506;rs48042782;rs8242766;rs31555580;rs31557390;rs3722740;rs3705274;rs31218323;rs47959443;rs31572828;rs31567752;rs31561281;rs31559428;rs49959361
chr1_15087.34	chr1:171566096-171566346	Intron (ENSMUST00000004829.12/18106, intron 1 of 8)		Cd244a	6.96556	1	78.499	76.6714	80.452	171041085	170949421	172706936	Significant in baseline	No effect	15	15	12	12	rs48042782	Affy_10351506;rs48042782;rs8242766;rs31555580;rs31557390;rs3722740;rs3705274;rs31218323;rs47959443;rs31572828;rs31567752;rs31561281;rs31559428;rs49959361
chr1_15087.35	chr1:171566346-171566596	Intron (ENSMUST00000004829.12/18106, intron 1 of 8)		Cd244a	6.25154	1	79.303	76.6714	80.452	171041085	170949421	172706936	Significant in baseline	No effect	17	17	13	13	rs48042782	Affy_10351506;rs48042782;rs8242766;rs31555580;rs31557390;rs3722740;rs3705274;rs31218323;rs47959443;rs31572828;rs31567752;rs31561281;rs31559428;rs49959361
chr1_15087.36	chr1:171566596-171566846	Intron (ENSMUST00000004829.12/18106, intron 1 of 8)		Cd244a	6.62405	1	79.303	76.6714	80.452	171041085	170949421	172706936	Significant in baseline	No effect	17	17	13	13	rs48042782	Affy_10351506;rs48042782;rs8242766;rs31555580;rs31557390;rs3722740;rs3705274;rs31218323;rs47959443;rs31572828;rs31567752;rs31561281;rs31559428;rs49959361
chr1_15087.37	chr1:171566846-171567096	Intron (ENSMUST00000004829.12/18106, intron 1 of 8)	CTCF-only,CTCF-bound	Cd244a	7.151	1	79.303	76.6714	80.452	171041085	170949421	172706936	Significant in baseline	No effect	17	17	13	13	rs48042782	Affy_10351506;rs48042782;rs8242766;rs31555580;rs31557390;rs3722740;rs3705274;rs31218323;rs47959443;rs31572828;rs31567752;rs31561281;rs31559428;rs49959361
chr1_15087.4	chr1:171558596-171558846	Promoter (<=1kb)		Cd244a	7.00519	1	78.499	76.6714	80.452	171041085	170949421	172706936	Significant in baseline	No effect	15	15	12	12	rs48042782	Affy_10351506;rs48042782;rs8242766;rs31555580;rs31557390;rs3722740;rs3705274;rs31218323;rs47959443;rs31572828;rs31567752;rs31561281;rs31559428;rs49959361
chr1_15087.5	chr1:171558846-171559096	Promoter (<=1kb)		Cd244a	7.29616	1	78.499	76.6714	80.452	171041085	170949421	172706936	Significant in baseline	Protected effect	15	15	12	12	rs48042782	Affy_10351506;rs48042782;rs8242766;rs31555580;rs31557390;rs3722740;rs3705274;rs31218323;rs47959443;rs31572828;rs31567752;rs31561281;rs31559428;rs49959361
chr1_15087.6	chr1:171559096-171559346	Promoter (<=1kb)		Cd244a	7.00229	1	78.499	76.6714	80.452	171041085	170949421	172706936	Significant in baseline	Protected effect	15	15	12	12	rs48042782	Affy_10351506;rs48042782;rs8242766;rs31555580;rs31557390;rs3722740;rs3705274;rs31218323;rs47959443;rs31572828;rs31567752;rs31561281;rs31559428;rs49959361
chr1_15087.7	chr1:171559346-171559596	Promoter (<=1kb)		Cd244a	6.48737	1	78.499	76.6714	80.5792	171041085	170949421	172911308	Significant in baseline	No effect	15	15	12	12	rs48042782	Affy_10351506;rs48042782;rs8242766;rs31555580;rs31557390;rs3722740;rs3705274;rs31218323;rs47959443;rs31572828;rs31567752;rs31561281;rs31559428;rs49959361;rs51348059;rs259230007
chr1_15087.8	chr1:171559596-171559846	Promoter (<=1kb)		Cd244a	6.11752	1	78.499	76.6714	80.5792	171041085	170949421	172911308	Significant in baseline	No effect	15	15	12	12	rs48042782	Affy_10351506;rs48042782;rs8242766;rs31555580;rs31557390;rs3722740;rs3705274;rs31218323;rs47959443;rs31572828;rs31567752;rs31561281;rs31559428;rs49959361;rs51348059;rs259230007
chr1_15087.9	chr1:171559846-171560096	Promoter (<=1kb)		Cd244a	6.70849	1	78.499	76.6714	80.5792	171041085	170949421	172911308	Significant in baseline	No effect	15	15	12	12	rs48042782	Affy_10351506;rs48042782;rs8242766;rs31555580;rs31557390;rs3722740;rs3705274;rs31218323;rs47959443;rs31572828;rs31567752;rs31561281;rs31559428;rs49959361;rs51348059;rs259230007
chr1_15088.1	chr1:171567550-171567800	Intron (ENSMUST00000004829.12/18106, intron 1 of 8)		Cd244a	5.46278	1	78.499	76.6714	80.5792	171041085	170949421	172911308	Significant in baseline	No effect	15	15	12	12	rs48042782	Affy_10351506;rs48042782;rs8242766;rs31555580;rs31557390;rs3722740;rs3705274;rs31218323;rs47959443;rs31572828;rs31567752;rs31561281;rs31559428;rs49959361;rs51348059;rs259230007
chr1_15088.2	chr1:171567800-171568050	Intron (ENSMUST00000004829.12/18106, intron 1 of 8)		Cd244a	6.21547	1	78.499	76.6714	80.452	171041085	170949421	172706936	Significant in baseline	No effect	15	15	12	12	rs48042782	Affy_10351506;rs48042782;rs8242766;rs31555580;rs31557390;rs3722740;rs3705274;rs31218323;rs47959443;rs31572828;rs31567752;rs31561281;rs31559428;rs49959361
chr1_15088.3	chr1:171568050-171568300	Intron (ENSMUST00000004829.12/18106, intron 1 of 8)		Cd244a	7.3395	1	78.499	76.6714	80.452	171041085	170949421	172706936	Significant in baseline	No effect	15	15	12	12	rs48042782	Affy_10351506;rs48042782;rs8242766;rs31555580;rs31557390;rs3722740;rs3705274;rs31218323;rs47959443;rs31572828;rs31567752;rs31561281;rs31559428;rs49959361
chr1_15088.4	chr1:171568300-171568550	Intron (ENSMUST00000004829.12/18106, intron 1 of 8)		Cd244a	6.83346	1	78.499	76.6714	80.452	171041085	170949421	172706936	Significant in baseline	No effect	15	15	12	12	rs48042782	Affy_10351506;rs48042782;rs8242766;rs31555580;rs31557390;rs3722740;rs3705274;rs31218323;rs47959443;rs31572828;rs31567752;rs31561281;rs31559428;rs49959361
chr1_15088.5	chr1:171568550-171568800	Intron (ENSMUST00000004829.12/18106, intron 1 of 8)		Cd244a	7.27893	1	78.499	76.6714	80.3248	171041085	170949421	172444585	Significant in baseline	No effect	15	15	12	12	rs48042782	Affy_10351506;rs48042782;rs8242766;rs31555580;rs31557390;rs3722740;rs3705274;rs31218323;rs47959443;rs31572828;rs31567752;rs31561281
chr1_15088.6	chr1:171568800-171569050	Intron (ENSMUST00000004829.12/18106, intron 1 of 8)		Cd244a	6.79284	1	78.499	76.6714	80.5792	171041085	170949421	172911308	Significant in baseline	No effect	15	15	12	12	rs48042782	Affy_10351506;rs48042782;rs8242766;rs31555580;rs31557390;rs3722740;rs3705274;rs31218323;rs47959443;rs31572828;rs31567752;rs31561281;rs31559428;rs49959361;rs51348059;rs259230007
chr1_15088.7	chr1:171569050-171569300	Intron (ENSMUST00000004829.12/18106, intron 1 of 8)		Cd244a	6.36028	1	78.499	76.6714	80.5792	171041085	170949421	172911308	Significant in baseline	No effect	15	15	12	12	rs48042782	Affy_10351506;rs48042782;rs8242766;rs31555580;rs31557390;rs3722740;rs3705274;rs31218323;rs47959443;rs31572828;rs31567752;rs31561281;rs31559428;rs49959361;rs51348059;rs259230007
chr1_15088.8	chr1:171569300-171569550	Intron (ENSMUST00000004829.12/18106, intron 1 of 8)		Cd244a	6.24895	1	78.499	76.6714	80.5792	171041085	170949421	172911308	Significant in baseline	Protected effect	15	15	12	12	rs48042782	Affy_10351506;rs48042782;rs8242766;rs31555580;rs31557390;rs3722740;rs3705274;rs31218323;rs47959443;rs31572828;rs31567752;rs31561281;rs31559428;rs49959361;rs51348059;rs259230007
chr1_15089.1	chr1:171569710-171569960	Intron (ENSMUST00000004829.12/18106, intron 1 of 8)		Cd244a	6.40422	1	79.303	76.6714	80.452	171041085	170949421	172706936	Significant in baseline	No effect	17	17	13	13	rs48042782	Affy_10351506;rs48042782;rs8242766;rs31555580;rs31557390;rs3722740;rs3705274;rs31218323;rs47959443;rs31572828;rs31567752;rs31561281;rs31559428;rs49959361
chr1_15090.1	chr1:171573170-171573420	Intron (ENSMUST00000004829.12/18106, intron 1 of 8)		Cd244a	6.15459	1	78.499	76.6714	80.452	171041085	170949421	172706936	Significant in baseline	No effect	15	15	12	12	rs48042782	Affy_10351506;rs48042782;rs8242766;rs31555580;rs31557390;rs3722740;rs3705274;rs31218323;rs47959443;rs31572828;rs31567752;rs31561281;rs31559428;rs49959361
chr1_15090.2	chr1:171573420-171573670	Intron (ENSMUST00000004829.12/18106, intron 1 of 8)		Cd244a	5.40053	1	79.303	76.6714	80.5792	171041085	170949421	172911308	Significant in baseline	No effect	17	17	13	13	rs48042782	Affy_10351506;rs48042782;rs8242766;rs31555580;rs31557390;rs3722740;rs3705274;rs31218323;rs47959443;rs31572828;rs31567752;rs31561281;rs31559428;rs49959361;rs51348059;rs259230007
chr1_15090.3	chr1:171573670-171573920	Exon (ENSMUST00000004829.12/18106, exon 2 of 9)		Cd244a	5.46915	1	78.499	76.6714	81.2213	171041085	170949421	173645553	Significant in baseline	No effect	15	15	12	12	rs48042782	Affy_10351506;rs48042782;rs8242766;rs31555580;rs31557390;rs3722740;rs3705274;rs31218323;rs47959443;rs31572828;rs31567752;rs31561281;rs31559428;rs49959361;rs51348059;rs259230007;rs31612847;rs31608155;rs31405208;rs46128598;rs31590468;rs31587587
chr1_15090.4	chr1:171573920-171574170	Exon (ENSMUST00000004829.12/18106, exon 2 of 9)		Cd244a	5.80615	1	79.303	76.6714	80.5792	171041085	170949421	172911308	Significant in baseline	No effect	17	17	13	13	rs48042782	Affy_10351506;rs48042782;rs8242766;rs31555580;rs31557390;rs3722740;rs3705274;rs31218323;rs47959443;rs31572828;rs31567752;rs31561281;rs31559428;rs49959361;rs51348059;rs259230007
chr1_15090.5	chr1:171574170-171574420	Exon (ENSMUST00000004829.12/18106, exon 3 of 9)		Cd244a	6.10005	1	78.499	76.6714	80.5792	171041085	170949421	172911308	Significant in baseline	No effect	15	15	12	12	rs48042782	Affy_10351506;rs48042782;rs8242766;rs31555580;rs31557390;rs3722740;rs3705274;rs31218323;rs47959443;rs31572828;rs31567752;rs31561281;rs31559428;rs49959361;rs51348059;rs259230007
chr1_15091.1	chr1:171574655-171574905	Intron (ENSMUST00000004829.12/18106, intron 3 of 8)		Cd244a	5.07905	1	79.303	76.6714	80.5792	171041085	170949421	172911308	Significant in baseline	No effect	17	17	13	13	rs48042782	Affy_10351506;rs48042782;rs8242766;rs31555580;rs31557390;rs3722740;rs3705274;rs31218323;rs47959443;rs31572828;rs31567752;rs31561281;rs31559428;rs49959361;rs51348059;rs259230007
chr1_15091.2	chr1:171574905-171575155	Intron (ENSMUST00000004829.12/18106, intron 3 of 8)		Cd244a	5.51722	1	78.499	76.6714	80.5792	171041085	170949421	172911308	Significant in baseline	No effect	15	15	12	12	rs48042782	Affy_10351506;rs48042782;rs8242766;rs31555580;rs31557390;rs3722740;rs3705274;rs31218323;rs47959443;rs31572828;rs31567752;rs31561281;rs31559428;rs49959361;rs51348059;rs259230007
chr1_15091.3	chr1:171575155-171575405	Intron (ENSMUST00000004829.12/18106, intron 3 of 8)		Cd244a	6.09483	1	78.499	76.6714	80.5792	171041085	170949421	172911308	Significant in baseline	No effect	15	15	12	12	rs48042782	Affy_10351506;rs48042782;rs8242766;rs31555580;rs31557390;rs3722740;rs3705274;rs31218323;rs47959443;rs31572828;rs31567752;rs31561281;rs31559428;rs49959361;rs51348059;rs259230007
chr1_15091.4	chr1:171575405-171575655	Intron (ENSMUST00000004829.12/18106, intron 3 of 8)		Cd244a	6.42872	1	78.499	76.6714	80.3248	171041085	170949421	172444585	Significant in baseline	No effect	15	15	12	12	rs48042782	Affy_10351506;rs48042782;rs8242766;rs31555580;rs31557390;rs3722740;rs3705274;rs31218323;rs47959443;rs31572828;rs31567752;rs31561281
chr1_15091.5	chr1:171575655-171575905	Intron (ENSMUST00000004829.12/18106, intron 3 of 8)		Cd244a	6.16317	1	78.499	76.6714	80.3248	171041085	170949421	172444585	Significant in baseline	No effect	15	15	12	12	rs48042782	Affy_10351506;rs48042782;rs8242766;rs31555580;rs31557390;rs3722740;rs3705274;rs31218323;rs47959443;rs31572828;rs31567752;rs31561281
chr1_15092.1	chr1:171576774-171577024	Promoter (2-3kb)		Cd244a	6.34363	1	78.499	76.6714	80.5792	171041085	170949421	172911308	Significant in baseline	No effect	15	15	12	12	rs48042782	Affy_10351506;rs48042782;rs8242766;rs31555580;rs31557390;rs3722740;rs3705274;rs31218323;rs47959443;rs31572828;rs31567752;rs31561281;rs31559428;rs49959361;rs51348059;rs259230007
chr1_15092.2	chr1:171577024-171577274	Promoter (1-2kb)		Cd244a	5.83072	1	79.303	76.6714	81.2213	171041085	170949421	173645553	Significant in baseline	No effect	17	17	13	13	rs48042782	Affy_10351506;rs48042782;rs8242766;rs31555580;rs31557390;rs3722740;rs3705274;rs31218323;rs47959443;rs31572828;rs31567752;rs31561281;rs31559428;rs49959361;rs51348059;rs259230007;rs31612847;rs31608155;rs31405208;rs46128598;rs31590468;rs31587587
chr1_15092.3	chr1:171577274-171577524	Promoter (1-2kb)		Cd244a	6.85853	1	79.303	76.6714	80.452	171041085	170949421	172706936	Significant in baseline	No effect	17	17	13	13	rs48042782	Affy_10351506;rs48042782;rs8242766;rs31555580;rs31557390;rs3722740;rs3705274;rs31218323;rs47959443;rs31572828;rs31567752;rs31561281;rs31559428;rs49959361
chr1_15092.4	chr1:171577524-171577774	Promoter (1-2kb)		Cd244a	5.90857	1	78.499	76.6714	80.5792	171041085	170949421	172911308	Significant in baseline	No effect	15	15	12	12	rs48042782	Affy_10351506;rs48042782;rs8242766;rs31555580;rs31557390;rs3722740;rs3705274;rs31218323;rs47959443;rs31572828;rs31567752;rs31561281;rs31559428;rs49959361;rs51348059;rs259230007
chr1_15092.5	chr1:171577774-171578024	Promoter (1-2kb)		Cd244a	6.15359	1	78.499	76.6714	80.452	171041085	170949421	172706936	Significant in baseline	No effect	15	15	12	12	rs48042782	Affy_10351506;rs48042782;rs8242766;rs31555580;rs31557390;rs3722740;rs3705274;rs31218323;rs47959443;rs31572828;rs31567752;rs31561281;rs31559428;rs49959361
chr1_15093.1	chr1:171578337-171578587	Promoter (<=1kb)		Cd244a	6.40594	1	78.499	76.6714	80.452	171041085	170949421	172706936	Significant in baseline	No effect	15	15	12	12	rs48042782	Affy_10351506;rs48042782;rs8242766;rs31555580;rs31557390;rs3722740;rs3705274;rs31218323;rs47959443;rs31572828;rs31567752;rs31561281;rs31559428;rs49959361
chr1_15093.10	chr1:171580587-171580837	Promoter (1-2kb)		Cd244a	5.96711	1	78.499	76.6714	80.5792	171041085	170949421	172911308	Significant in baseline	No effect	15	15	12	12	rs48042782	Affy_10351506;rs48042782;rs8242766;rs31555580;rs31557390;rs3722740;rs3705274;rs31218323;rs47959443;rs31572828;rs31567752;rs31561281;rs31559428;rs49959361;rs51348059;rs259230007
chr1_15093.11	chr1:171580837-171581087	Promoter (1-2kb)		Cd244a	5.83136	1	78.499	76.6714	80.5792	171041085	170949421	172911308	Significant in baseline	No effect	15	15	12	12	rs48042782	Affy_10351506;rs48042782;rs8242766;rs31555580;rs31557390;rs3722740;rs3705274;rs31218323;rs47959443;rs31572828;rs31567752;rs31561281;rs31559428;rs49959361;rs51348059;rs259230007
chr1_15093.12	chr1:171581087-171581337	Promoter (2-3kb)		Cd244a	6.5602	1	79.303	76.6714	80.452	171041085	170949421	172706936	Significant in baseline	Protected effect	17	17	13	13	rs48042782	Affy_10351506;rs48042782;rs8242766;rs31555580;rs31557390;rs3722740;rs3705274;rs31218323;rs47959443;rs31572828;rs31567752;rs31561281;rs31559428;rs49959361
chr1_15093.13	chr1:171581337-171581587	Promoter (2-3kb)		Cd244a	6.73501	1	79.303	76.6714	80.3248	171041085	170949421	172444585	Significant in baseline	No effect	17	17	13	13	rs48042782	Affy_10351506;rs48042782;rs8242766;rs31555580;rs31557390;rs3722740;rs3705274;rs31218323;rs47959443;rs31572828;rs31567752;rs31561281
chr1_15093.14	chr1:171581587-171581837	Promoter (2-3kb)		Cd244a	6.45349	1	78.499	76.6714	80.452	171041085	170949421	172706936	Significant in baseline	No effect	15	15	12	12	rs48042782	Affy_10351506;rs48042782;rs8242766;rs31555580;rs31557390;rs3722740;rs3705274;rs31218323;rs47959443;rs31572828;rs31567752;rs31561281;rs31559428;rs49959361
chr1_15093.2	chr1:171578587-171578837	Promoter (<=1kb)	dELS	Cd244a	6.58215	1	78.499	76.6714	80.452	171041085	170949421	172706936	Significant in baseline	No effect	15	15	12	12	rs48042782	Affy_10351506;rs48042782;rs8242766;rs31555580;rs31557390;rs3722740;rs3705274;rs31218323;rs47959443;rs31572828;rs31567752;rs31561281;rs31559428;rs49959361
chr1_15093.3	chr1:171578837-171579087	Promoter (<=1kb)	dELS	Cd244a	6.19001	1	79.303	76.6714	80.452	171041085	170949421	172706936	Significant in baseline	No effect	17	17	13	13	rs48042782	Affy_10351506;rs48042782;rs8242766;rs31555580;rs31557390;rs3722740;rs3705274;rs31218323;rs47959443;rs31572828;rs31567752;rs31561281;rs31559428;rs49959361
chr1_15093.4	chr1:171579087-171579337	Promoter (<=1kb)		Cd244a	6.5125	1	78.499	76.6714	80.452	171041085	170949421	172706936	Significant in baseline	No effect	15	15	12	12	rs48042782	Affy_10351506;rs48042782;rs8242766;rs31555580;rs31557390;rs3722740;rs3705274;rs31218323;rs47959443;rs31572828;rs31567752;rs31561281;rs31559428;rs49959361
chr1_15093.6	chr1:171579587-171579837	Promoter (<=1kb)	dELS	Cd244a	5.23006	1	78.499	76.6714	80.3248	171041085	170949421	172444585	Significant in baseline	No effect	15	15	12	12	rs48042782	Affy_10351506;rs48042782;rs8242766;rs31555580;rs31557390;rs3722740;rs3705274;rs31218323;rs47959443;rs31572828;rs31567752;rs31561281
chr1_15093.8	chr1:171580087-171580337	Promoter (1-2kb)	dELS	Cd244a	6.19864	1	79.303	76.6714	80.5792	171041085	170949421	172911308	Significant in baseline	No effect	17	17	13	13	rs48042782	Affy_10351506;rs48042782;rs8242766;rs31555580;rs31557390;rs3722740;rs3705274;rs31218323;rs47959443;rs31572828;rs31567752;rs31561281;rs31559428;rs49959361;rs51348059;rs259230007
chr1_15099.2	chr1:171635194-171635444	Intron (ENSMUST00000192195.5/75345, intron 7 of 7)		Mir7683	5.23492	1	79.303	76.6714	83.6131	171041085	170949421	179922241	Significant in baseline	No effect	17	17	13	13	rs48042782	Affy_10351506;rs48042782;rs8242766;rs31555580;rs31557390;rs3722740;rs3705274;rs31218323;rs47959443;rs31572828;rs31567752;rs31561281;rs31559428;rs49959361;rs51348059;rs259230007;rs31612847;rs31608155;rs31405208;rs46128598;rs31590468;rs31587587;rs31584856;rs3682996;rs3669108;rs6375522;rs4136041;rs31329176;rs31420065;rs32559774;Affy_10352113;Affy_4563273;rs30712622;rs31282255
chr1_15102.3	chr1:171658354-171658604	Distal Intergenic		Slamf7	3.58823	1	79.303	76.6714	84.6328	171041085	170949421	182749095	Significant in baseline	Protected effect	17	17	13	13	rs48042782	Affy_10351506;rs48042782;rs8242766;rs31555580;rs31557390;rs3722740;rs3705274;rs31218323;rs47959443;rs31572828;rs31567752;rs31561281;rs31559428;rs49959361;rs51348059;rs259230007;rs31612847;rs31608155;rs31405208;rs46128598;rs31590468;rs31587587;rs31584856;rs3682996;rs3669108;rs6375522;rs4136041;rs31329176;rs31420065;rs32559774;Affy_10352113;Affy_4563273;rs30712622;rs31282255;rs30991108;rs32374329;r…
chr1_15102.4	chr1:171658604-171658854	Distal Intergenic	dELS,CTCF-bound	Slamf7	3.80837	1	83.4858	75.5962	83.6131	179862838	170535283	179922241	Significant in baseline	No effect	20	20	11	11	rs30712622	rs48742671;Affy_10351506;rs48042782;rs8242766;rs31555580;rs31557390;rs3722740;rs3705274;rs31218323;rs47959443;rs31572828;rs31567752;rs31561281;rs31559428;rs49959361;rs51348059;rs259230007;rs31612847;rs31608155;rs31405208;rs46128598;rs31590468;rs31587587;rs31584856;rs3682996;rs3669108;rs6375522;rs4136041;rs31329176;rs31420065;rs32559774;Affy_10352113;Affy_4563273;rs30712622;rs31282255
chr1_15104.1	chr1:171672940-171673190	Distal Intergenic	dELS	Cd48	7.3183	1	79.303	76.6714	80.5792	171041085	170949421	172911308	Significant in baseline	Protected effect	17	17	13	13	rs48042782	Affy_10351506;rs48042782;rs8242766;rs31555580;rs31557390;rs3722740;rs3705274;rs31218323;rs47959443;rs31572828;rs31567752;rs31561281;rs31559428;rs49959361;rs51348059;rs259230007
chr1_15104.2	chr1:171673190-171673440	Distal Intergenic	dELS	Cd48	7.03039	1	79.303	76.6714	80.5792	171041085	170949421	172911308	Significant in baseline	Protected effect	17	17	13	13	rs48042782	Affy_10351506;rs48042782;rs8242766;rs31555580;rs31557390;rs3722740;rs3705274;rs31218323;rs47959443;rs31572828;rs31567752;rs31561281;rs31559428;rs49959361;rs51348059;rs259230007
chr1_15107.1	chr1:171713775-171714025	Distal Intergenic		Cd48	5.93248	1	79.303	76.6714	81.2213	171041085	170949421	173645553	Significant in baseline	Protected effect	17	17	13	13	rs48042782	Affy_10351506;rs48042782;rs8242766;rs31555580;rs31557390;rs3722740;rs3705274;rs31218323;rs47959443;rs31572828;rs31567752;rs31561281;rs31559428;rs49959361;rs51348059;rs259230007;rs31612847;rs31608155;rs31405208;rs46128598;rs31590468;rs31587587
chr1_15140.15	chr1:172019132-172019382	Intron (ENSMUST00000027837.12/93840, intron 1 of 7)	dELS	Vangl2	4.21422	1	80.0703	76.6714	81.094	172175373	170949421	173633577	Significant in baseline	No effect	18	18	13	13	rs31218323	Affy_10351506;rs48042782;rs8242766;rs31555580;rs31557390;rs3722740;rs3705274;rs31218323;rs47959443;rs31572828;rs31567752;rs31561281;rs31559428;rs49959361;rs51348059;rs259230007;rs31612847;rs31608155;rs31405208;rs46128598
chr1_15140.16	chr1:172019382-172019632	Intron (ENSMUST00000027837.12/93840, intron 1 of 7)	dELS	Vangl2	6.75687	1	79.303	76.6714	80.452	171041085	170949421	172706936	Significant in baseline	No effect	17	17	13	13	rs48042782	Affy_10351506;rs48042782;rs8242766;rs31555580;rs31557390;rs3722740;rs3705274;rs31218323;rs47959443;rs31572828;rs31567752;rs31561281;rs31559428;rs49959361
chr1_15140.17	chr1:172019632-172019882	Intron (ENSMUST00000027837.12/93840, intron 1 of 7)		Vangl2	4.99619	1	78.499	76.6714	83.4858	171041085	170949421	179862838	Significant in baseline	No effect	15	15	12	12	rs48042782	Affy_10351506;rs48042782;rs8242766;rs31555580;rs31557390;rs3722740;rs3705274;rs31218323;rs47959443;rs31572828;rs31567752;rs31561281;rs31559428;rs49959361;rs51348059;rs259230007;rs31612847;rs31608155;rs31405208;rs46128598;rs31590468;rs31587587;rs31584856;rs3682996;rs3669108;rs6375522;rs4136041;rs31329176;rs31420065;rs32559774;Affy_10352113;Affy_4563273;rs30712622
chr1_15140.18	chr1:172019882-172020132	Intron (ENSMUST00000027837.12/93840, intron 1 of 7)		Vangl2	6.69138	1	79.303	76.6714	80.452	171041085	170949421	172706936	Significant in baseline	No effect	17	17	13	13	rs48042782	Affy_10351506;rs48042782;rs8242766;rs31555580;rs31557390;rs3722740;rs3705274;rs31218323;rs47959443;rs31572828;rs31567752;rs31561281;rs31559428;rs49959361
chr1_15140.19	chr1:172020132-172020382	Intron (ENSMUST00000027837.12/93840, intron 1 of 7)		Vangl2	5.73629	1	79.9431	76.6714	80.5792	171193042	170949421	172911308	Significant in baseline	No effect	18	18	13	13	rs31557390	Affy_10351506;rs48042782;rs8242766;rs31555580;rs31557390;rs3722740;rs3705274;rs31218323;rs47959443;rs31572828;rs31567752;rs31561281;rs31559428;rs49959361;rs51348059;rs259230007
chr1_15140.20	chr1:172020382-172020632	Intron (ENSMUST00000027837.12/93840, intron 1 of 7)		Vangl2	5.30301	1	79.499	76.6714	80.5792	171051752	170949421	172911308	Significant in baseline	No effect	17	17	13	13	rs8242766	Affy_10351506;rs48042782;rs8242766;rs31555580;rs31557390;rs3722740;rs3705274;rs31218323;rs47959443;rs31572828;rs31567752;rs31561281;rs31559428;rs49959361;rs51348059;rs259230007
chr1_15140.21	chr1:172020632-172020882	Intron (ENSMUST00000027837.12/93840, intron 1 of 7)		Vangl2	4.2847	1	81.2213	76.6714	83.4858	173645553	170949421	179862838	Significant in baseline	No effect	17	17	14	14	rs31587587	Affy_10351506;rs48042782;rs8242766;rs31555580;rs31557390;rs3722740;rs3705274;rs31218323;rs47959443;rs31572828;rs31567752;rs31561281;rs31559428;rs49959361;rs51348059;rs259230007;rs31612847;rs31608155;rs31405208;rs46128598;rs31590468;rs31587587;rs31584856;rs3682996;rs3669108;rs6375522;rs4136041;rs31329176;rs31420065;rs32559774;Affy_10352113;Affy_4563273;rs30712622
chr1_15148.4	chr1:172047076-172047326	Distal Intergenic	pELS,CTCF-bound; PLS,CTCF-bound	Nhlh1	4.73461	1	79.303	76.6714	83.4858	171041085	170949421	179862838	Significant in baseline	No effect	17	17	13	13	rs48042782	Affy_10351506;rs48042782;rs8242766;rs31555580;rs31557390;rs3722740;rs3705274;rs31218323;rs47959443;rs31572828;rs31567752;rs31561281;rs31559428;rs49959361;rs51348059;rs259230007;rs31612847;rs31608155;rs31405208;rs46128598;rs31590468;rs31587587;rs31584856;rs3682996;rs3669108;rs6375522;rs4136041;rs31329176;rs31420065;rs32559774;Affy_10352113;Affy_4563273;rs30712622
chr1_15148.4	chr1:172047076-172047326	Distal Intergenic	pELS,CTCF-bound; PLS,CTCF-bound	Nhlh1	3.56267	4	21.0516	8.72953	24.0034	46855266	19581204	57379856	No baseline effect	No effect	5	5	26	26	rs27785516	rs27682826;rs32844444;rs13477592;rs32866890;petM-01609-1;UNC040021552;rs262523552;rs31788174;rs46920250;rs13477595;rs28314852;rs32208316;rs50441952;rs32135516;rs13477601;rs27733220;rs32555118;rs32486054;rs27713263;rs32438765;rs13477622;rs27736595;rs3701432;rs50102689;rs27779705;rs31949226;rs32976519;rs32917539;rs47775155;rs27730370;rs27756664;rs13477630;rs27792767;rs32711339;rs27791935;rs27791934…
chr1_15149.2	chr1:172048020-172048270	Distal Intergenic	pELS	Nhlh1	3.61631	18	23.0197	19.034	24.6209	49946939	39809358	55966804	Significant in baseline	No effect	13	13	18	18	rs13483354	rs29878134;rs29774579;rs13483314;rs50813675;rs49650054;rs3683264;rs29868350;rs29874243;rs49948966;rs243630124;rs13483328;rs31925045;rs6355722;rs29979159;rs29999629;rs29672459;rs237536737;rs3716758;rs29678518;rs30180395;rs29720204;rs29861737;rs29584951;rs29555033;rs49297670;rs30152148;rs30105124;rs29863756;rs3703039;rs6402149;rs4138356;rs29858908;rs13483354;rs30005587;rs6240957;rs3706369;rs2995737…
chr1_15149.5	chr1:172048770-172049020	Distal Intergenic	pELS	Nhlh1	4.37203	1	79.499	76.6714	80.5792	171051752	170949421	172911308	Significant in baseline	No effect	17	17	13	13	rs8242766	Affy_10351506;rs48042782;rs8242766;rs31555580;rs31557390;rs3722740;rs3705274;rs31218323;rs47959443;rs31572828;rs31567752;rs31561281;rs31559428;rs49959361;rs51348059;rs259230007
chr1_15149.6	chr1:172049020-172049270	Distal Intergenic	pELS	Nhlh1	5.29163	1	78.499	76.6714	80.5792	171041085	170949421	172911308	Significant in baseline	No effect	15	15	12	12	rs48042782	Affy_10351506;rs48042782;rs8242766;rs31555580;rs31557390;rs3722740;rs3705274;rs31218323;rs47959443;rs31572828;rs31567752;rs31561281;rs31559428;rs49959361;rs51348059;rs259230007
chr1_15149.7	chr1:172049270-172049520	Distal Intergenic	dELS; pELS	Nhlh1	6.26607	1	79.303	76.6714	83.4858	171041085	170949421	179862838	Significant in baseline	No effect	17	17	13	13	rs48042782	Affy_10351506;rs48042782;rs8242766;rs31555580;rs31557390;rs3722740;rs3705274;rs31218323;rs47959443;rs31572828;rs31567752;rs31561281;rs31559428;rs49959361;rs51348059;rs259230007;rs31612847;rs31608155;rs31405208;rs46128598;rs31590468;rs31587587;rs31584856;rs3682996;rs3669108;rs6375522;rs4136041;rs31329176;rs31420065;rs32559774;Affy_10352113;Affy_4563273;rs30712622
chr1_15149.8	chr1:172049520-172049770	Distal Intergenic	dELS	Nhlh1	3.9073	17	41.332	37.6929	44.0659	72137412	68799858	76161956	Significant in baseline	No effect	17	17	14	14	rs33439067	rs13483086;rs48858029;rs52567611;rs33051917;rs46100420;rs33063772;rs51197135;rs221906684;rs33439067;rs49876370;rs6322076;rs52344503;rs47281349;rs33107102;rs108784848;rs49334714;rs48872651;rs13483106;rs13483109;rs50096855;rs33268301;rs13483110
chr1_15150.4	chr1:172053587-172053837	3' UTR	dELS	Nhlh1	3.92152	1	6.499	5.33546	24.8259	13890559	12938444	42248208	Significant in baseline	No effect	13	13	17	17	rs6296049	rs36585555;rs30477285;rs32223513;rs45688852;rs48988706;rs31710291;rs31794283;rs6296049;rs32381514;rs31577697;rs30996958;rs31574495;rs32016169;rs6291839;rs32105394;rs3088964;rs30752472;rs3678179;rs32109300;rs32127151;rs47275793;rs32039596;rs51394091;rs31817535;rs32171777;rs32043384;rs219716413;rs13475747;rs51820747;rs51700370;rs52118613;rs31772262;rs3670611;rs224386739;rs36660068;rs6404446;rs32101…
chr1_15151.6	chr1:172057139-172057389	Promoter (<=1kb)		Nhlh1	4.66371	11	76.783	74.7287	76.783	121597434	120956900	121597434	Significant in baseline	Protected effect	16	16	15	15	rs26984211	rs29388476;rs29437770;rs26984211
chr1_15155.4	chr1:172064866-172065116	Promoter (2-3kb)	pELS,CTCF-bound	Ncstn	4.59192	1	78.499	75.5962	80.5792	171041085	170535283	172911308	Significant in baseline	Protected effect	15	15	12	12	rs48042782	rs48742671;Affy_10351506;rs48042782;rs8242766;rs31555580;rs31557390;rs3722740;rs3705274;rs31218323;rs47959443;rs31572828;rs31567752;rs31561281;rs31559428;rs49959361;rs51348059;rs259230007
chr1_15162.1	chr1:172115942-172116192	Promoter (1-2kb)		Copa	4.42446	1	78.499	76.6714	80.452	171041085	170949421	172706936	Significant in baseline	Protected effect	15	15	12	12	rs48042782	Affy_10351506;rs48042782;rs8242766;rs31555580;rs31557390;rs3722740;rs3705274;rs31218323;rs47959443;rs31572828;rs31567752;rs31561281;rs31559428;rs49959361
chr1_15169.1	chr1:172128619-172128869	Promoter (1-2kb)		Pex19	3.82196	12	31.8232	29.5593	32.9903	75295456	74977482	75731217	Significant in baseline	No effect	14	14	16	16	rs29187781	rs29199201;rs6346026;rs29184803;rs29187781;rs29149379;rs29169309;rs13481536;rs13481537
chr1_15171.1	chr1:172133600-172133810	Promoter (<=1kb)	dELS	Pex19	3.77747	1	79.303	76.6714	85.1477	171041085	170949421	183579128	Significant in baseline	Protected effect	17	17	13	13	rs48042782	Affy_10351506;rs48042782;rs8242766;rs31555580;rs31557390;rs3722740;rs3705274;rs31218323;rs47959443;rs31572828;rs31567752;rs31561281;rs31559428;rs49959361;rs51348059;rs259230007;rs31612847;rs31608155;rs31405208;rs46128598;rs31590468;rs31587587;rs31584856;rs3682996;rs3669108;rs6375522;rs4136041;rs31329176;rs31420065;rs32559774;Affy_10352113;Affy_4563273;rs30712622;rs31282255;rs30991108;rs32374329;r…
chr1_15174.1	chr1:172143049-172143299	Distal Intergenic		Dcaf8	4.08167	18	28.7344	27.5149	29.9054	57388000	57293890	58397406	Significant in baseline	No effect	13	13	18	18	rs29734505	rs13483378;rs29734505;rs29623515;rs50365956;rs29629484;rs231278170;rs30007478;rs46002551
chr1_15184.4	chr1:172194517-172194767	3' UTR		Pea15a	4.04131	18	11.7517	7.29701	12.2626	25381764	16294373	28108368	Significant in baseline	Protected effect	14	14	17	17	rs29576003	rs48697581;rs30259953;rs6358426;rs30270059;rs50406373;rs29868533;rs3707555;rs6387540;rs223212013;rs47650854;rs6164602;rs16792910;rs29568169;rs31307278;rs235520776;rs29726468;rs50830791;rs29775702;rs29724682;rs49756738;rs31506385;rs29974640;rs51187195;rs13483255;rs52584820;rs29575364;rs29576003;rs46153785;rs13483260;rs13483264;rs13483265;rs52333343
chr1_15185.1	chr1:172195532-172195782	3' UTR		Pea15a	3.78978	8	10.7128	9.67296	30.0626	24488797	21960955	80868085	Significant in baseline	No effect	16	16	15	15	rs32992395	rs32578496;rs32965880;rs51270544;rs33394599;rs32671831;rs32992395;rs33512313;D8Mit95;rs32873739;rs45749791;rs50374251;rs13479653;rs33516211;rs33539160;rs50995641;rs48472043;rs33093931;rs6342753;rs32655697;rs36993874;rs33309170;rs32762139;rs229091067;rs13479666;rs32656013;rs52435481;rs49984277;rs32670486;rs36586270;rs51450663;rs47157565;rs45702315;rs52330644;rs36293636;rs32656198;rs47084371;rs5022…
chr1_15187.4	chr1:172200277-172200527	Promoter (<=1kb)		Pea15a	3.94506	14	44.024	40.7839	46.2542	104938113	101341425	111030179	Significant in baseline	No effect	19	19	9	9	rs32493279	rs31434207;rs31191541;rs13482348;rs32436494;rs33858318;rs36445774;rs13482349;rs32493279;rs48603130;rs13482354;rs3654132;rs31177297;rs47602612;D14Mit165;rs30543008;rs6410104;rs3681491;rs31504939;rs3674260;rs4139535;rs30699087;rs51819433
chr1_15211.10	chr1:172280365-172280615	Exon (ENSMUST00000085913.10/98660, exon 14 of 23)		Atp1a2	4.2498	1	80.452	76.6714	83.4858	172706936	170949421	179862838	Significant in baseline	No effect	18	18	13	13	rs49959361	Affy_10351506;rs48042782;rs8242766;rs31555580;rs31557390;rs3722740;rs3705274;rs31218323;rs47959443;rs31572828;rs31567752;rs31561281;rs31559428;rs49959361;rs51348059;rs259230007;rs31612847;rs31608155;rs31405208;rs46128598;rs31590468;rs31587587;rs31584856;rs3682996;rs3669108;rs6375522;rs4136041;rs31329176;rs31420065;rs32559774;Affy_10352113;Affy_4563273;rs30712622
chr1_15221.2	chr1:172297454-172297704	Promoter (<=1kb)	dELS	Atp1a2	3.5447	1	79.303	6.74282	85.1477	171041085	14753392	183579128	Significant in baseline	No effect	17	17	13	13	rs48042782	rs31574495;rs32016169;rs6291839;rs32105394;rs3088964;rs30752472;rs3678179;rs32109300;rs32127151;rs47275793;rs32039596;rs51394091;rs31817535;rs32171777;rs32043384;rs219716413;rs13475747;rs51820747;rs51700370;rs52118613;rs31772262;rs3670611;rs224386739;rs36660068;rs6404446;rs32101154;rs6253968;rs32315565;rs31766107;rs46856073;rs46249537;rs31949292;rs30499557;rs6316488;rs32400861;rs32597415;rs228543…
chr1_15223.21	chr1:172310488-172310738	Promoter (1-2kb)	pELS,CTCF-bound	Igsf8	4.0051	14	33.8837	27.5521	35.9997	84448836	72943308	93711205	Significant in baseline	No effect	12	12	17	17	rs30699113	rs52601385;rs13482251;rs49092877;rs31155986;rs221790235;rs3701623;rs31352727;rs30592001;rs31344892;rs30404658;rs222585609;rs50267306;rs31357182;rs13482255;rs30763341;rs50473249;rs30640939;rs13482262;rs51257993;rs30565505;rs30678419;rs13482263;rs3665356;rs46120541;rs31043651;rs6190358;rs6352085;rs32178029;rs30315663;rs32243760;rs30386882;rs13482270;rs30802214;rs31282914;rs32270416;rs31131715;rs211…
chr1_15223.47	chr1:172316988-172317238	Promoter (1-2kb)		Igsf8	3.83241	7	36.5705	33.217	41.8487	70164959	66458029	80219561	Significant in baseline	No effect	19	19	12	12	rs3723790	rs33083941;rs13479306;rs33090887;rs33110025;rs36964709;rs32453663;rs32227186;rs31254634;rs248506740;rs49250542;rs33115352;rs31669097;rs6405142;rs31874398;rs50094898;rs31992478;rs3723790;rs45788892;rs31390539;rs32444104;rs31037523;rs37007295;rs47119834;rs31882027;rs13479326;rs31453122;rs32299443;rs31064232;rs46054811;rs31783952;rs227095692;rs31342575;rs31623161;rs31597771;rs31246895;rs13479334;UNC…
chr1_15223.55	chr1:172318988-172319238	Promoter (<=1kb)		Igsf8	3.61347	1	78.499	76.6714	81.2213	171041085	170949421	173645553	Significant in baseline	No effect	15	15	12	12	rs48042782	Affy_10351506;rs48042782;rs8242766;rs31555580;rs31557390;rs3722740;rs3705274;rs31218323;rs47959443;rs31572828;rs31567752;rs31561281;rs31559428;rs49959361;rs51348059;rs259230007;rs31612847;rs31608155;rs31405208;rs46128598;rs31590468;rs31587587
chr1_15223.6	chr1:172306738-172306988	Intron (ENSMUST00000139528.7/140559, intron 3 of 8)	dELS	Igsf8	4.69638	8	43.2998	38.904	45.864	107509859	96288666	111319339	Significant in baseline	No effect	17	17	14	14	rs33551061	rs3661882;rs32579649;rs38578518;rs33065931;rs32809239;rs33017697;rs6377892;rs33453782;rs3660197;rs50407843;rs3712818;rs49833803;rs3683922;rs47064165;rs32420724;rs48756956;rs30757772;rs30771728;rs13479958;rs46061215;rs33015720;rs33004646;rs6180306;rs52431037;rs52240807;rs30960224;rs6182338;rs13479970;rs33551061;rs31013353;rs33519536;rs49094676;rs50465429;rs31021623;rs31032628;rs3715791;rs13479975;…
chr1_15223.79	chr1:172324988-172325238	Promoter (2-3kb)		Kcnj9	6.13577	1	79.303	76.6714	80.452	171041085	170949421	172706936	Significant in baseline	No effect	17	17	13	13	rs48042782	Affy_10351506;rs48042782;rs8242766;rs31555580;rs31557390;rs3722740;rs3705274;rs31218323;rs47959443;rs31572828;rs31567752;rs31561281;rs31559428;rs49959361
chr1_15224.4	chr1:172331184-172331434	Promoter (1-2kb)		Kcnj9	3.76426	2	93.9085	93.2605	98.4467	173549919	173426500	178717320	Significant in baseline	Protected effect	16	16	15	15	rs27644500	rs27621324;rs27644551;rs27644503;rs27644500;rs6384888;rs27644412;rs33360234;Affy_PC2_176;rs3674193
chr1_15226.1	chr1:172334813-172335063	Distal Intergenic	dELS	Kcnj9	3.68249	18	33.149	30.4262	39.6621	60000000	58466157	66630118	Significant in baseline	No effect	11	11	15	15	Affy_PC18_60	rs3713935;Affy_PC18_60;Affy_PC18_61;Affy_PC18_62;Affy_4809913;rs29557439;rs13483407;rs29775877;rs45932736;rs3658391;rs46094763;rs29770804;rs49823091;rs52714787
chr1_15245.4	chr1:172367846-172368096	Intron (ENSMUST00000056136.3/16513, intron 1 of 1)		Pigm	3.78249	4	68.1148	8.98398	70.4696	153232320	19959851	154837278	Significant in baseline	Protected effect	16	16	15	15	rs32938494	petM-01609-1;UNC040021552;rs262523552;rs31788174;rs46920250;rs13477595;rs28314852;rs32208316;rs50441952;rs32135516;rs13477601;rs27733220;rs32555118;rs32486054;rs27713263;rs32438765;rs13477622;rs27736595;rs3701432;rs50102689;rs27779705;rs31949226;rs32976519;rs32917539;rs47775155;rs27730370;rs27756664;rs13477630;rs27792767;rs32711339;rs27791935;rs27791934;rs27774374;rs27792227;rs31834998;rs52242743…
chr1_15246.5	chr1:172369674-172369924	Exon (ENSMUST00000056136.3/16513, exon 2 of 2)		Pigm	3.74022	3	27.4359	24.7365	29.2493	61218458	56466293	65524002	Significant in baseline	No effect	20	20	11	11	rs30810079	rs30159374;rs6319642;rs31596392;rs47166276;rs30893154;rs31153645;rs46360803;rs30723371;rs51859403;rs6334912;rs31737774;rs6363066;rs30725761;UNC5348732;rs6301139;rs30401146;rs30810079;rs52481290;rs47064658;rs13477144;rs107736772;rs6191597;rs46649841;rs30886554;rs30259722;rs6251307;UNCHS008889;rs31482508;rs31239141;rs51669923
chr1_1525.2	chr1:33755298-33755548	Promoter (2-3kb)	dELS	Bag2	3.4194	8	49.5024	42.6597	55.9901	115700700	106642265	126582425	Significant in baseline	No effect	15	15	16	16	rs33032461	rs6180306;rs52431037;rs52240807;rs30960224;rs6182338;rs13479970;rs33551061;rs31013353;rs33519536;rs49094676;rs50465429;rs31021623;rs31032628;rs3715791;rs13479975;UNC080532671;rs32928525;rs225424560;rs31084940;rs3656921;rs3662808;rs31158659;rs31161793;rs32674736;rs32780597;rs51217319;rs33570756;rs13479984;rs33110413;rs13479987;rs13479993;rs37325528;rs49552855;rs37229383;rs13479996;rs46907062;rs331…
chr1_1527.9	chr1:33758389-33758639	Promoter (<=1kb)	pELS	Bag2	3.71828	9	36.5406	33.8531	41.6632	80143686	73489040	88484548	Significant in baseline	Down effect	9	9	22	22	rs29838871	rs29642375;rs33721794;rs50092389;rs13480277;rs30177108;rs30435599;rs30325798;rs32937841;rs32942316;rs33673325;rs47184393;rs30336558;rs48203762;rs51001273;rs48404400;rs13480283;rs51783723;rs3685573;rs29937483;rs47655596;rs48929937;rs3674482;rs48049528;rs13480288;rs50191883;rs33634028;rs6332933;rs30382305;rs29838871;rs29832062;rs29939347;rs52493010;rs256305655;rs3695047;rs3697374;rs52006743;rs29934…
chr1_15274.5	chr1:172521518-172521768	Promoter (<=1kb)		Cfap45	3.79389	12	45.585	43.53	48.7051	99576264	98800000	102692302	Significant in baseline	No effect	8	8	18	18	rs32932796	Affy_5606639etal;rs32932796;rs13481611;rs50404154;rs29197824;rs29485259;rs261802530;rs29191794;D12Mit231;rs6171439;rs29487819;rs52330407;rs3690738;rs33018718;rs13481617;rs36449728;rs13481618;rs29150969;rs29155115
chr1_15276.3	chr1:172523789-172524039	Promoter (2-3kb)	pELS	Cfap45	3.85607	1	79.303	76.6714	82.1197	171041085	170949421	178156680	Significant in baseline	No effect	17	17	13	13	rs48042782	Affy_10351506;rs48042782;rs8242766;rs31555580;rs31557390;rs3722740;rs3705274;rs31218323;rs47959443;rs31572828;rs31567752;rs31561281;rs31559428;rs49959361;rs51348059;rs259230007;rs31612847;rs31608155;rs31405208;rs46128598;rs31590468;rs31587587;rs31584856;rs3682996;rs3669108;rs6375522;rs4136041;rs31329176;rs31420065;rs32559774;Affy_10352113;Affy_4563273
chr1_15288.1	chr1:172548603-172548853	Promoter (1-2kb)	dELS	4933439K11Rik	3.73947	7	50.0948	44.0292	56.9557	98124258	83878657	115077097	Significant in baseline	No effect	18	18	13	13	rs8281437	rs31416354;rs31476858;rs32066094;rs6278282;rs31521374;rs37626662;rs31488447;rs32267337;rs6394492;rs32174327;rs31133462;rs31178835;rs32409257;rs32326663;rs31182975;rs31345154;rs32416091;rs31867408;rs32124327;rs31349093;rs31709999;rs32510496;rs31238492;rs31093558;rs4226783;rs31732570;rs36361468;rs32131184;rs31481725;rs51546480;rs13479416;rs31323776;rs31894020;rs31494684;rs31541427;rs31551122;rs4861…
chr1_15289.4	chr1:172550065-172550315	Promoter (<=1kb)		4933439K11Rik	4.03942	1	77.499	74.8025	81.094	170949421	167823479	173633577	Significant in baseline	No effect	15	15	12	12	Affy_10351506	rs48267649;rs50209411;rs48742671;Affy_10351506;rs48042782;rs8242766;rs31555580;rs31557390;rs3722740;rs3705274;rs31218323;rs47959443;rs31572828;rs31567752;rs31561281;rs31559428;rs49959361;rs51348059;rs259230007;rs31612847;rs31608155;rs31405208;rs46128598
chr1_15295.1	chr1:172561781-172562031	Promoter (1-2kb)	dELS	Vsig8	3.63678	1	83.499	76.6714	85.1477	179862838	170949421	183579128	Significant in baseline	No effect	19	19	11	11	rs30712622	Affy_10351506;rs48042782;rs8242766;rs31555580;rs31557390;rs3722740;rs3705274;rs31218323;rs47959443;rs31572828;rs31567752;rs31561281;rs31559428;rs49959361;rs51348059;rs259230007;rs31612847;rs31608155;rs31405208;rs46128598;rs31590468;rs31587587;rs31584856;rs3682996;rs3669108;rs6375522;rs4136041;rs31329176;rs31420065;rs32559774;Affy_10352113;Affy_4563273;rs30712622;rs31282255;rs30991108;rs32374329;r…
chr1_15295.5	chr1:172562781-172563031	Promoter (2-3kb)	dELS,CTCF-bound	Vsig8	4.72269	1	79.303	76.6714	80.452	171041085	170949421	172706936	Significant in baseline	Protected effect	17	17	13	13	rs48042782	Affy_10351506;rs48042782;rs8242766;rs31555580;rs31557390;rs3722740;rs3705274;rs31218323;rs47959443;rs31572828;rs31567752;rs31561281;rs31559428;rs49959361
chr1_15325.1	chr1:173270689-173270939	Promoter (<=1kb)		Or10j2	5.2713	1	81.4757	81.3485	83.4858	175769156	173679184	179862838	Significant in baseline	No effect	18	18	13	13	rs31420065	rs31584856;rs3682996;rs3669108;rs6375522;rs4136041;rs31329176;rs31420065;rs32559774;Affy_10352113;Affy_4563273;rs30712622
chr1_15326.3	chr1:173322068-173322318	Distal Intergenic	dELS	Ackr1	5.3414	8	49.3751	46.5201	49.5024	114834580	113706505	115700700	Significant in baseline	Up effect	15	15	16	16	rs31419266	rs37325528;rs49552855;rs37229383;rs13479996;rs46907062;rs33124580;rs51327407;rs51267308;rs3700124;rs47704538;rs31366297;rs31371365;rs31411257;rs31417341;rs31419266;rs6227298;rs33032461
chr1_15330.4	chr1:173334081-173334331	Promoter (<=1kb)		Ackr1	4.2901	4	40.1178	37.7862	62.2989	105245023	103640707	141438369	Significant in baseline	No effect	9	9	22	22	rs28168986	rs13477881;rs28166983;rs28141328;rs32319287;rs32964865;rs3726736;rs51514865;rs28168986;rs32095190;rs28169629;rs28169619;rs28153610;rs28136596;rs239687939;rs3721642;rs28127052;rs28148311;rs28162181;rs28128000;rs236723228;rs28148673;rs51569534;rs3664637;rs28132552;rs28127730;rs28127592;rs50723740;rs3680956;rs32854841;rs3703879;rs32723992;rs28303726;rs32615342;rs46019551;rs47460195;rs52263933;rs3244…
chr1_15330.7	chr1:173334831-173335081	Promoter (1-2kb)		Ackr1	4.21458	19	20.1345	19.3692	20.3909	25666451	23946802	26367816	Significant in baseline	Protected effect	20	20	11	11	rs3701438	rs6259521;rs50770041;rs36248454;rs37431787;rs30559268;rs31003102;D19Mit40;rs48677986;rs31140289;rs37450285;rs3701438;rs30809789;rs3669236
chr1_1535.1	chr1:33792573-33792823	3' UTR	dELS	Zfp451	4.08828	2	87.896	86.8703	89.922	169644858	168436299	170826974	Significant in baseline	No effect	21	21	10	10	rs3663663	rs27341626;rs27341574;rs6319166;rs48233920;rs29506586;rs6160839;rs27288701;rs49223793;rs27622025;rs3663663;rs27628756;rs27628736;rs27628709;rs3148016;rs3148034;rs13476914
chr1_15357.1	chr1:173955109-173955359	Distal Intergenic		Ifi203	5.38503	1	81.3485	81.3485	83.4858	173679184	173679184	179862838	Significant in baseline	Protected effect	18	18	13	13	rs31584856	rs31584856;rs3682996;rs3669108;rs6375522;rs4136041;rs31329176;rs31420065;rs32559774;Affy_10352113;Affy_4563273;rs30712622
chr1_15357.1	chr1:173955109-173955359	Distal Intergenic		Ifi203	3.656	5	44.533	40.3585	60.7811	85578195	76145898	118918193	Significant in baseline	No effect	6	6	25	25	rs36756778	rs3153753;rs6222023;rs33381347;rs6257272;rs13478336;rs29566735;rs33576539;rs33644925;rs29523614;rs33067522;rs31609646;rs3675410;rs33378080;rs33513530;rs13478361;rs29778798;rs33704055;rs31633450;rs6262346;rs31647919;rs33739891;rs36756778;rs33191657;rs33567801;rs33102602;rs29567700;rs6167407;rs33341991;rs33743089;rs239322408;rs47992579;rs31702694;rs4225368;UNCHS015017;rs52431723;rs3723202;rs1347839…
chr1_15360.1	chr1:173995065-173995315	Intron (ENSMUST00000195502.1/ENSMUST00000195502.1, intron 2 of 2)		Ifi202b	4.45375	1	81.3485	7.63933	83.4858	173679184	16106636	179862838	Significant in baseline	Protected effect	18	18	13	13	rs31584856	rs47275793;rs32039596;rs51394091;rs31817535;rs32171777;rs32043384;rs219716413;rs13475747;rs51820747;rs51700370;rs52118613;rs31772262;rs3670611;rs224386739;rs36660068;rs6404446;rs32101154;rs6253968;rs32315565;rs31766107;rs46856073;rs46249537;rs31949292;rs30499557;rs6316488;rs32400861;rs32597415;rs228543676;rs239824187;rs13475765;rs4222215;rs13475766;rs31567874;rs32245765;rs32487442;rs13475771;rs13…
chr1_15369.1	chr1:174509744-174509994	Intron (ENSMUST00000030039.12/54418, intron 1 of 17)		Fmn2	4.59811	1	81.4757	81.3485	83.4858	175769156	173679184	179862838	Significant in baseline	No effect	18	18	13	13	rs31420065	rs31584856;rs3682996;rs3669108;rs6375522;rs4136041;rs31329176;rs31420065;rs32559774;Affy_10352113;Affy_4563273;rs30712622
chr1_15381.2	chr1:174598192-174598442	Intron (ENSMUST00000030039.12/54418, intron 4 of 17)	dELS	Fmn2	4.78722	1	82.499	80.5792	83.6131	178156680	172911308	179922241	Significant in baseline	No effect	18	18	11	11	Affy_4563273	rs259230007;rs31612847;rs31608155;rs31405208;rs46128598;rs31590468;rs31587587;rs31584856;rs3682996;rs3669108;rs6375522;rs4136041;rs31329176;rs31420065;rs32559774;Affy_10352113;Affy_4563273;rs30712622;rs31282255
chr1_15381.3	chr1:174598442-174598692	Intron (ENSMUST00000030039.12/54418, intron 4 of 17)	dELS	Fmn2	4.86097	1	82.499	81.3485	83.6131	178156680	173679184	179922241	Significant in baseline	No effect	18	18	11	11	Affy_4563273	rs31584856;rs3682996;rs3669108;rs6375522;rs4136041;rs31329176;rs31420065;rs32559774;Affy_10352113;Affy_4563273;rs30712622;rs31282255
chr1_15401.1	chr1:174816804-174817054	Intron (ENSMUST00000030039.12/54418, intron 16 of 17)		Fmn2	6.02922	1	81.3485	81.3485	83.4858	173679184	173679184	179862838	Significant in baseline	No effect	18	18	13	13	rs31584856	rs31584856;rs3682996;rs3669108;rs6375522;rs4136041;rs31329176;rs31420065;rs32559774;Affy_10352113;Affy_4563273;rs30712622
chr1_15402.1	chr1:174827423-174827673	Distal Intergenic		Grem2	4.11982	1	75.5962	74.8025	83.4858	170535283	167823479	179862838	Significant in baseline	Protected effect	18	18	12	12	rs48742671	rs48267649;rs50209411;rs48742671;Affy_10351506;rs48042782;rs8242766;rs31555580;rs31557390;rs3722740;rs3705274;rs31218323;rs47959443;rs31572828;rs31567752;rs31561281;rs31559428;rs49959361;rs51348059;rs259230007;rs31612847;rs31608155;rs31405208;rs46128598;rs31590468;rs31587587;rs31584856;rs3682996;rs3669108;rs6375522;rs4136041;rs31329176;rs31420065;rs32559774;Affy_10352113;Affy_4563273;rs30712622
chr1_15421.1	chr1:175071618-175071801	Intron (ENSMUST00000192227.5/24012, intron 16 of 16)		Rgs7	5.90381	1	82.1197	80.5792	83.4858	178156680	172911308	179862838	Significant in baseline	No effect	18	18	13	13	Affy_4563273	rs259230007;rs31612847;rs31608155;rs31405208;rs46128598;rs31590468;rs31587587;rs31584856;rs3682996;rs3669108;rs6375522;rs4136041;rs31329176;rs31420065;rs32559774;Affy_10352113;Affy_4563273;rs30712622
chr1_15423.1	chr1:175082000-175082250	Promoter (2-3kb)	dELS	Rgs7	7.13938	1	82.1197	81.3485	83.4858	178156680	173679184	179862838	Significant in baseline	No effect	18	18	13	13	Affy_4563273	rs31584856;rs3682996;rs3669108;rs6375522;rs4136041;rs31329176;rs31420065;rs32559774;Affy_10352113;Affy_4563273;rs30712622
chr1_15466.2	chr1:175389378-175389628	Intron (ENSMUST00000194555.5/24012, intron 2 of 17)		Rgs7	4.40144	1	82.499	76.6714	83.6131	178156680	170949421	179922241	Significant in baseline	No effect	18	18	11	11	Affy_4563273	Affy_10351506;rs48042782;rs8242766;rs31555580;rs31557390;rs3722740;rs3705274;rs31218323;rs47959443;rs31572828;rs31567752;rs31561281;rs31559428;rs49959361;rs51348059;rs259230007;rs31612847;rs31608155;rs31405208;rs46128598;rs31590468;rs31587587;rs31584856;rs3682996;rs3669108;rs6375522;rs4136041;rs31329176;rs31420065;rs32559774;Affy_10352113;Affy_4563273;rs30712622;rs31282255
chr1_15466.3	chr1:175389628-175389878	Intron (ENSMUST00000194555.5/24012, intron 2 of 17)		Rgs7	3.94513	1	81.3485	79.303	84.6328	173679184	171041085	182749095	Significant in baseline	Protected effect	18	18	13	13	rs31584856	rs48042782;rs8242766;rs31555580;rs31557390;rs3722740;rs3705274;rs31218323;rs47959443;rs31572828;rs31567752;rs31561281;rs31559428;rs49959361;rs51348059;rs259230007;rs31612847;rs31608155;rs31405208;rs46128598;rs31590468;rs31587587;rs31584856;rs3682996;rs3669108;rs6375522;rs4136041;rs31329176;rs31420065;rs32559774;Affy_10352113;Affy_4563273;rs30712622;rs31282255;rs30991108;rs32374329;rs51978750;rs49…
chr1_15469.3	chr1:175420830-175421080	Intron (ENSMUST00000194555.5/24012, intron 2 of 17)	dELS	Rgs7	3.62773	1	82.499	76.6714	84.6328	178156680	170949421	182749095	Significant in baseline	Protected effect	18	18	11	11	Affy_4563273	Affy_10351506;rs48042782;rs8242766;rs31555580;rs31557390;rs3722740;rs3705274;rs31218323;rs47959443;rs31572828;rs31567752;rs31561281;rs31559428;rs49959361;rs51348059;rs259230007;rs31612847;rs31608155;rs31405208;rs46128598;rs31590468;rs31587587;rs31584856;rs3682996;rs3669108;rs6375522;rs4136041;rs31329176;rs31420065;rs32559774;Affy_10352113;Affy_4563273;rs30712622;rs31282255;rs30991108;rs32374329;r…
chr1_15469.4	chr1:175421080-175421330	Intron (ENSMUST00000194555.5/24012, intron 2 of 17)	dELS	Rgs7	3.89874	1	82.499	76.6714	85.1477	178156680	170949421	183579128	Significant in baseline	Protected effect	18	18	11	11	Affy_4563273	Affy_10351506;rs48042782;rs8242766;rs31555580;rs31557390;rs3722740;rs3705274;rs31218323;rs47959443;rs31572828;rs31567752;rs31561281;rs31559428;rs49959361;rs51348059;rs259230007;rs31612847;rs31608155;rs31405208;rs46128598;rs31590468;rs31587587;rs31584856;rs3682996;rs3669108;rs6375522;rs4136041;rs31329176;rs31420065;rs32559774;Affy_10352113;Affy_4563273;rs30712622;rs31282255;rs30991108;rs32374329;r…
chr1_1547.1	chr1:33883381-33883631	Promoter (<=1kb)	dELS,CTCF-bound	Bend6	3.97355	14	48.8306	48.4489	50.4015	117841014	117038077	118537399	Significant in baseline	No effect	15	15	15	15	rs3711767	rs3671398;rs30893914;rs6286809;rs3711767;rs30438807;rs30259301;rs49879578
chr1_15642.3	chr1:177010143-177010393	Intron (ENSMUST00000027785.14/76816, intron 16 of 17)		Sdccag8	3.7518	19	15.6462	14.7536	15.9026	21398774	19868858	21809324	Significant in baseline	Protected effect	17	17	14	14	rs39106501	rs51110867;rs3694495;rs48044555;rs49900587;rs3023480;rs30858374;rs3668911;rs31289940;rs30999093;rs13483561;rs39106501;rs31197593;rs30358861
chr1_15717.3	chr1:177460519-177460769	Exon (ENSMUST00000191905.1/ENSMUST00000191905.1, exon 3 of 3)		Zbtb18	4.00475	14	14.5656	13.5299	15.2217	39148462	33718809	39196761	Significant in baseline	No effect	9	9	22	22	rs13482141	rs46140950;rs3695383;rs47825817;rs31464447;rs49774947;rs13482141;rs50310529
chr1_15825.6	chr1:178528451-178528701	Promoter (<=1kb)	dELS	Kif26b	4.16258	12	29.1717	27.8794	31.696	73000000	69603799	75002704	Significant in baseline	No effect	13	13	13	13	Affy_4992472etal	rs13481514;rs47126031;rs29165578;rs32231802;rs29491724;rs49357547;rs13481518;rs13481521;rs49391506;Affy_4992472etal;rs29199201;rs6346026
chr1_16046.2	chr1:179940113-179940363	Distal Intergenic		Cdc42bpa	3.81373	8	49.5024	43.5562	50.0172	115700700	107960245	116510173	Significant in baseline	Protected effect	15	15	16	16	rs33032461	rs33519536;rs49094676;rs50465429;rs31021623;rs31032628;rs3715791;rs13479975;UNC080532671;rs32928525;rs225424560;rs31084940;rs3656921;rs3662808;rs31158659;rs31161793;rs32674736;rs32780597;rs51217319;rs33570756;rs13479984;rs33110413;rs13479987;rs13479993;rs37325528;rs49552855;rs37229383;rs13479996;rs46907062;rs33124580;rs51327407;rs51267308;rs3700124;rs47704538;rs31366297;rs31371365;rs31411257;rs31…
chr1_16056.1	chr1:180021437-180021687	Exon (ENSMUST00000191822.1/ENSMUST00000191822.1, exon 1 of 1)	pELS	Cdc42bpa	4.99386	1	32.499	29.54	32.7764	57825372	47189877	58115573	Significant in baseline	No effect	14	14	15	15	rs13475879	rs32093536;rs31325347;rs32602884;rs32209957;rs32662962;rs31517020;rs31565873;rs13475872;rs32434080;rs33840699;rs51350456;rs47870456;rs29596070;rs13475876;rs32516530;rs13475879;rs29655680
chr1_1607.2	chr1:34067718-34067968	Intron (ENSMUST00000183034.4/13518, intron 4 of 102)		Dst	3.63457	17	17.1066	6.78148	18.1465	35021441	9273439	40571110	Significant in baseline	No effect	24	24	7	7	UNCHS044198	rs50348976;rs13482864;rs33397317;rs29500073;rs33393386;rs46339515;rs33183615;rs49702852;rs33169172;rs108375027;rs33518122;rs3662820;rs33637088;rs33220795;rs30924502;rs29499971;rs3654149;rs51863865;rs6181074;rs33314464;rs16783619;rs31589117;rs52562350;rs31862018;rs31423591;rs32518416;rs32170136;rs33864009;rs33668338;rs33570052;rs33641175;rs51376412;rs52488232;rs3659741;rs13459150;rs33464875;rs2953…
chr1_16081.1	chr1:180159451-180159701	Promoter (1-2kb)		Cdc42bpa	4.07886	7	23.9853	2.33686	57.0829	40301499	4844959	115084347	Significant in baseline	No effect	17	17	14	14	rs3668040	Affy_10549582_Tsen34;rs32523680;rs37227876;rs31568496;rs31427805;rs32197605;rs13479124;rs31227373;rs32264975;rs32395390;rs31417211;rs32532297;rs31007463;rs32016537;rs31940859;rs6295100;rs32475097;rs36950811;rs36485889;rs36616278;rs36640846;rs31326828;rs233127051;rs32223696;rs32231955;rs31098779;rs31943378;rs219815674;rs33864199;rs51319463;rs260994887;UNCHS019541;rs46067640;rs49693858;rs31572894;r…
chr1_16115.1	chr1:180248118-180248368	Promoter (<=1kb)	dELS	Psen2	4.12792	11	45.4082	40.9726	45.7919	82187018	79252230	83484449	Significant in baseline	No effect	18	18	12	12	rs28207497	rs13481117;rs13481119;Affy_PC_Suz12;Affy_PC_Myo1d;rs29431896;rs28207497;rs51375319;rs28191186;rs28190476
chr1_16116.2	chr1:180249746-180249996	Promoter (1-2kb)	dELS,CTCF-bound	Psen2	4.00516	7	43.1288	16.4605	52.9154	83050747	31360167	107369035	Significant in baseline	Protected effect	16	16	15	15	rs46378974	rs46476185;rs32501401;rs46107184;rs52305240;rs31940507;rs32012050;rs37208863;rs31512362;rs31561779;rs32477373;rs32067315;rs47488275;rs46107226;rs32555260;rs31736746;rs32561437;rs250232227;rs31623270;rs32569368;rs32567376;rs24886524;rs223788707;rs32586510;rs31370895;rs46370011;rs31221380;rs31098751;rs31097519;rs46443969;rs32505740;rs50885945;rs13479203;rs13479204;rs31490265;rs228487255;rs3668040;r…
chr1_1613.3	chr1:34077088-34077338	Promoter (<=1kb)	dELS	Dst	4.04409	2	11.546	9.43718	21.1231	18764774	15000000	42556591	Significant in baseline	No effect	17	17	12	12	rs27144318	Affy_PC2_15;rs13476358;rs27126014;rs29503212;rs27125983;rs27125935;rs6384589;rs13476363;rs27144318;rs33092900;rs13476364;rs27127331;rs49733425;rs27140323;rs6292983;rs27136990;rs27137272;rs13476379;rs6193345;rs29866286;rs27219279;rs52428815;rs6286688;rs33287256;rs32869517;rs33279854;rs13476386;rs27186439;rs33369549;rs27195273;rs33136036;rs13476390;rs33081937;rs27184053;rs27185513;rs13465578;rs3286…
chr1_16139.9	chr1:180332386-180332636	Promoter (1-2kb)	dELS	Itpkb	3.5691	11	56.966	52.9003	60.2066	101250880	95628102	104670154	Significant in baseline	No effect	9	9	18	18	rs29422564	rs13481170;rs27105221;rs235845435;rs27052851;rs47508103;rs27086489;rs29435192;rs29445436;rs27026080;rs27026004;D11Mit99;rs13481185;rs27058443;rs29442012;rs27072810;rs3154925;rs3154428;rs47248855;rs29422564;rs27057342;rs29431671;rs13481194;rs48815028;UNC110164426;rs29454846;rs29453966;rs13481196;rs29466020;rs3709793;rs29410236;rs13481201;rs29419039;rs27008683;rs27021619;rs3690511;rs27021474;rs2700…
chr1_1617.1	chr1:34094255-34094505	Intron (ENSMUST00000183034.4/13518, intron 5 of 102)		Dst	4.53118	1	17.2113	3.16082	66.4935	33368251	5025197	145394499	Significant in baseline	Protected effect	18	18	13	13	rs30849932	rs30847416;rs32759286;rs31625087;rs31716357;rs3677817;rs47937185;rs32140280;rs32096391;rs47493511;rs31190522;rs6298633;rs31362910;rs31878990;rs32186775;rs31868650;rs6360236;rs32740138;rs249962268_D1Mit1;rs30991578;rs32347261;rs36585555;rs30477285;rs32223513;rs45688852;rs48988706;rs31710291;rs31794283;rs6296049;rs32381514;rs31577697;rs30996958;rs31574495;rs32016169;rs6291839;rs32105394;rs3088964;r…
chr1_16173.3	chr1:180411891-180412141	Intron (ENSMUST00000070181.6/320404, intron 2 of 7)		Stum	5.5433	1	83.6131	83.6131	85.1477	179922241	179922241	183579128	Significant in baseline	No effect	19	19	12	12	rs31282255	rs31282255;rs30991108;rs32374329;rs51978750;rs49397948;rs13476267;D1Mit426;rs31837265;rs32603212;rs33816636;rs8280550;rs32337187;rs49919565;rs30696745;rs50246612
chr1_16176.8	chr1:180418431-180418681	Intron (ENSMUST00000070181.6/320404, intron 5 of 7)		Stum	3.87029	13	18.25	16.6791	18.5045	47060993	45901723	47918469	Significant in baseline	No effect	17	17	14	14	rs29248396	rs3725387;rs30854176;rs233613258;rs29248396;rs48787355;rs46675329;rs3682400;rs13481805
chr1_16181.15	chr1:180436008-180436258	3' UTR		Stum	4.95785	19	44.096	38.617	45.8833	50482245	42483433	51994134	Significant in baseline	No effect	17	17	13	13	rs46278490	rs30621396;rs30320658;rs36772447;rs36652652;Affy_10467905;rs38080613;rs13483639;rs30667909;rs31274488;rs36521863;rs13483641;rs36931353;rs47499225;rs30320629;rs13483647;rs30886715;rs6376540;rs50610897;rs30567369;rs30556607;rs46999879;rs31157694;rs30419326;rs31282282;rs255692658;rs52477242;rs36491952;rs30902297;rs3691227;rs3660360;rs30367626;rs50499354;rs30313195;rs38377851;rs13483656;rs31206870;rs…
chr1_1619.1	chr1:34099507-34099707	Intron (ENSMUST00000183034.4/13518, intron 5 of 102)		Dst	7.46836	1	17.3385	16.0088	17.5929	33721638	32082234	34951753	Significant in baseline	No effect	18	18	13	13	rs46323879	rs32760971;rs31818207;rs30598074;rs13475795;rs30849932;rs46323879;rs31518908;rs31710287;rs16808053;rs221967485
chr1_16211.2	chr1:180509656-180509906	Intron (ENSMUST00000194222.1/ENSMUST00000194222.1, intron 3 of 3)		Stum	3.69294	1	84.499	79.303	85.6685	182001895	171041085	183947093	Significant in baseline	No effect	19	19	12	12	rs33816636	rs48042782;rs8242766;rs31555580;rs31557390;rs3722740;rs3705274;rs31218323;rs47959443;rs31572828;rs31567752;rs31561281;rs31559428;rs49959361;rs51348059;rs259230007;rs31612847;rs31608155;rs31405208;rs46128598;rs31590468;rs31587587;rs31584856;rs3682996;rs3669108;rs6375522;rs4136041;rs31329176;rs31420065;rs32559774;Affy_10352113;Affy_4563273;rs30712622;rs31282255;rs30991108;rs32374329;rs51978750;rs49…
chr1_16234.5	chr1:180577460-180577710	3' UTR		Parp1	3.96078	18	9.92189	7.29701	11.1097	21354599	16294373	24162250	Significant in baseline	Up effect	13	13	18	18	rs29726468	rs48697581;rs30259953;rs6358426;rs30270059;rs50406373;rs29868533;rs3707555;rs6387540;rs223212013;rs47650854;rs6164602;rs16792910;rs29568169;rs31307278;rs235520776;rs29726468;rs50830791;rs29775702;rs29724682;rs49756738;rs31506385;rs29974640
chr1_16244.4	chr1:180598385-180598635	Promoter (<=1kb)		Parp1	3.72123	17	10.0119	7.43765	14.2621	21686210	9373071	29885702	Significant in baseline	No effect	19	19	12	12	rs52562350	rs13482864;rs33397317;rs29500073;rs33393386;rs46339515;rs33183615;rs49702852;rs33169172;rs108375027;rs33518122;rs3662820;rs33637088;rs33220795;rs30924502;rs29499971;rs3654149;rs51863865;rs6181074;rs33314464;rs16783619;rs31589117;rs52562350;rs31862018;rs31423591;rs32518416;rs32170136;rs33864009;rs33668338;rs33570052;rs33641175;rs51376412;rs52488232;rs3659741;rs13459150;rs33464875;rs29536256;rs3331…
chr1_16251.2	chr1:180640688-180640938	Promoter (<=1kb)	pELS,CTCF-bound	Lin9	4.105	X	28.0508	24.0251	28.5617	105681574	100000000	106824805	Significant in baseline	No effect	14	14	17	17	rs29078218	Affy_PCX_98;rs29080095;rs29079207;rs221018515;rs29080049;rs33867617;rs242953106;rs29078805;rs29078218;rs13483927;UNC31181244;rs29094834
chr1_16331.5	chr1:180972901-180973151	Exon (ENSMUST00000027800.14/208795, exon 22 of 23)		Tmem63a	4.73085	1	84.3764	83.6131	85.1477	182001895	179922241	183579128	Significant in baseline	No effect	19	19	12	12	rs33816636	rs31282255;rs30991108;rs32374329;rs51978750;rs49397948;rs13476267;D1Mit426;rs31837265;rs32603212;rs33816636;rs8280550;rs32337187;rs49919565;rs30696745;rs50246612
chr1_1644.1	chr1:34153548-34153798	Intron (ENSMUST00000183034.4/13518, intron 11 of 102)		Dst	4.1243	1	17.3385	14.345	20.4159	33721638	27253420	39140420	Significant in baseline	No effect	18	18	13	13	rs46323879	rs48222526;rs223334166;rs31670161;rs31134323;rs47868189;rs31600419;rs30514876;rs32110348;rs31590459;rs32372810;rs32684509;rs230225148;rs48664698;rs32760971;rs31818207;rs30598074;rs13475795;rs30849932;rs46323879;rs31518908;rs31710287;rs16808053;rs221967485;rs47717565;rs13475808;rs30604008;rs30525912;rs13475810;rs13475816;rs32180312;rs31935537;rs32551229;rs32942136;rs32635513;rs3705697;Affy_1034562…
chr1_16470.1	chr1:181625913-181626163	Intron (ENSMUST00000208001.1/ENSMUST00000208001.1, intron 16 of 83)		Ccdc121rt1	4.48894	2	94.5525	93.2605	94.5525	176000000	173426500	176000000	No baseline effect	No effect	13	13	11	11	Affy_PC2_176	rs27621324;rs27644551;rs27644503;rs27644500;rs6384888;rs27644412;rs33360234;Affy_PC2_176
chr1_16537.2	chr1:182139803-182140053	Distal Intergenic		Srp9	3.57421	10	59.3183	58.0382	62.6649	121448883	120336501	123469006	Significant in baseline	No effect	23	23	8	8	rs31367123	rs29376196;rs29320859;rs29355246;rs29364207;rs29383138;rs223696829;rs51729084;rs6237927;rs31351606;rs29368762;rs29321891;rs31367123;rs245445223;rs29373822;rs47035681;rs31385490;rs29332147;rs29339168;rs13480797;rs29379368;rs29359824;rs33850810;rs13480802;rs29322909;rs29363342;rs29329201;rs29361937;rs29353697
chr1_16542.1	chr1:182280474-182280724	Promoter (1-2kb)		Degs1	4.12253	14	15.3489	13.5299	15.4762	39351672	33718809	39833600	No baseline effect	Protected effect	8	8	23	23	rs52105441	rs46140950;rs3695383;rs47825817;rs31464447;rs49774947;rs13482141;rs50310529;rs213504122;rs52105441;rs30519739;rs6197032
chr1_16582.2	chr1:182487800-182488050	Intron (ENSMUST00000192568.1/ENSMUST00000192568.1, intron 1 of 3)		Capn2	5.30743	15	11.2174	8.75368	12.1119	12687693	12672707	14363733	Significant in baseline	No effect	18	18	12	12	rs31989090	rs13482436;rs31989090;rs31930369;rs3681808;rs50530011;JAX00394048;rs31844440;rs244589261;rs46459649
chr1_16585.2	chr1:182494414-182494664	Promoter (1-2kb)	dELS	Capn2	4.28059	6	16.342	15.7765	18.5589	32610603	32303315	34483299	Significant in baseline	No effect	18	18	12	12	rs47901097	rs30319084;rs3678887;rs3693410;rs30654706;rs47901097;rs49265509;rs29960521;rs50136596;rs30318085;rs30421613
chr1_16630.5	chr1:182764131-182764381	Promoter (<=1kb)	dELS,CTCF-bound	Susd4	3.50036	6	15.2656	13.1516	17.3394	32207574	28715963	34195112	Significant in baseline	No effect	15	15	16	16	rs30162995	rs30764547;rs29605219;rs29618131;rs29650874;rs13478687;rs52571055;rs29973656;rs13478690;rs30718075;rs30114467;rs30162995;rs29966306;rs13478694;rs30468068;rs30319084;rs3678887;rs3693410;rs30654706;rs47901097;rs49265509;rs29960521;rs50136596;rs30318085
chr1_16653.2	chr1:182822132-182822382	Intron (ENSMUST00000155229.6/96935, intron 2 of 3)		Susd4	4.34125	7	12.2971	7.90564	43.1288	26713260	23789532	83050747	Significant in baseline	No effect	21	21	10	10	rs36536360	rs46067640;rs49693858;rs31572894;rs31153518;Affy_4916353;rs13479153;rs51415723;rs8240817;rs49329686;rs31966575;rs36536360;rs31988344;rs37287696;rs13479163;rs39775784;rs32219787;rs31793211;rs46477628;rs32185835;rs47734376;rs32524656;rs31691249;rs47206075;rs46476185;rs32501401;rs46107184;rs52305240;rs31940507;rs32012050;rs37208863;rs31512362;rs31561779;rs32477373;rs32067315;rs47488275;rs46107226;rs…
chr1_16698.1	chr1:182985129-182985375	Distal Intergenic		Tlr5	4.04617	1	86.499	10.1917	87.8531	184323105	22400540	185790793	Significant in baseline	No effect	21	21	8	8	rs37406736	rs30499557;rs6316488;rs32400861;rs32597415;rs228543676;rs239824187;rs13475765;rs4222215;rs13475766;rs31567874;rs32245765;rs32487442;rs13475771;rs13475772;rs32249228;rs32331653;rs32086436;rs48222526;rs223334166;rs31670161;rs31134323;rs47868189;rs31600419;rs30514876;rs32110348;rs31590459;rs32372810;rs32684509;rs230225148;rs48664698;rs32760971;rs31818207;rs30598074;rs13475795;rs30849932;rs46323879;r…
chr1_16713.2	chr1:183075207-183075457	Distal Intergenic	dELS; dELS,CTCF-bound	Disp1	3.99598	1	86.1794	85.1477	86.8214	184322353	183579128	184730317	Significant in baseline	No effect	22	22	9	9	rs13476281	rs50246612;rs49141251;rs31307349;rs46841759;rs30477005;rs13476281;rs37406736;rs32470790;rs3681873;rs48322183;D1Mit291
chr1_16740.2	chr1:183161274-183161524	Intron (ENSMUST00000194033.1/68897, intron 2 of 2)		Disp1	3.72356	1	85.499	1.62623	86.9486	183947093	3511204	184880370	Significant in baseline	No effect	19	19	9	9	rs31307349	rs32285189;rs258367496;rs32430919;rs36251697;rs30658298;rs51852623;rs31879829;rs36742481;rs6365999;rs13470446;Affy_10344635;rs6376963;rs30847416;rs32759286;rs31625087;rs31716357;rs3677817;rs47937185;rs32140280;rs32096391;rs47493511;rs31190522;rs6298633;rs31362910;rs31878990;rs32186775;rs31868650;rs6360236;rs32740138;rs249962268_D1Mit1;rs30991578;rs32347261;rs36585555;rs30477285;rs32223513;rs45688…
chr1_1680.5	chr1:34238146-34238396	Promoter (1-2kb)	dELS	Dst	4.32092	4	52.1551	50.3855	53.8744	128178876	126716711	129932880	Significant in baseline	No effect	17	17	14	14	rs50384736	rs32386196;rs27549414;rs27563623;rs32617066;rs45695794;rs50384736;rs6407866;UNC8210955;rs3023009;UNC8215712
chr1_16803.1	chr1:183723485-183723735	Distal Intergenic		Gm34068	11.0531	7	31.9428	31.3007	31.9428	59625956	58449542	59625956	Significant in baseline	No effect	16	16	15	15	rs48647025	rs227921453;rs13479276;rs31561885;rs48647025
chr1_1681.1	chr1:34241962-34242212	Intron (ENSMUST00000183034.4/13518, intron 60 of 102)		Dst	3.86789	16	34.029	30.8146	38.4358	63849061	57552160	72576630	Significant in baseline	No effect	17	17	14	14	rs3667153	rs4189478;rs46356246;rs4189555;rs4189605;rs4190369;rs4190414;rs4191949;rs4191982;rs228359821;rs32779786;rs52638707;rs4192837;rs4192978;rs4193069;rs4193070;rs4193136;rs4193183;rs4193184;rs4193362;rs46860886;rs4194373;rs4195259;rs51363736;rs4195364;rs4151935;rs3667153;rs4195970;rs224522344;rs240260626;rs52468861;rs4196243;rs4197031;rs45658002;rs4197412;rs4197453;rs4197662;rs4197673;rs48372388;rs475…
chr1_16866.2	chr1:184831954-184832204	Exon (ENSMUST00000160982.1/67247, exon 3 of 3)		Mtarc2	3.78499	3	16.7314	12.0958	17.7571	41211676	36543329	46151173	Significant in baseline	No effect	19	19	12	12	rs51693383	rs30698864;rs3151914;rs3151902;rs29983817;UNCHS008426;rs3151465;UNCHS008443;rs30048108;UNC5057834;rs3141366;rs30082219;rs30089442;rs50091922;rs30801829;rs31523971;rs51367062;rs31525867;rs46477289;rs51901876;rs6274061;rs46594852;rs31313193;rs46436000;rs48319012;rs31183617;rs50354672;rs6324747;rs6248503;rs30504535;rs51693383;rs50859505;rs49738931;rs30805858;rs31187985;rs214051626;rs51693979;rs30351…
chr1_16875.1	chr1:184851198-184851448	Distal Intergenic	dELS	Mtarc2	4.06996	11	53.2879	50.8232	59.0497	96609418	93000000	103177521	Significant in baseline	No effect	10	10	20	20	rs235845435	AffY_PC11_93;rs230648083;rs47752027;rs13481170;rs27105221;rs235845435;rs27052851;rs47508103;rs27086489;rs29435192;rs29445436;rs27026080;rs27026004;D11Mit99;rs13481185;rs27058443;rs29442012;rs27072810;rs3154925;rs3154428;rs47248855;rs29422564;rs27057342;rs29431671;rs13481194;rs48815028;UNC110164426;rs29454846;rs29453966;rs13481196;rs29466020;rs3709793;rs29410236;rs13481201
chr1_16878.6	chr1:184860482-184860732	Distal Intergenic		Mtarc2	3.88174	7	30.826	28.3525	31.9428	56124439	49930385	59625956	Significant in baseline	Protected effect	16	16	14	14	rs32328305	rs213384118;rs32902400;rs31654490;rs50131576;rs47672774;rs3090660;rs229997718;rs30768844;rs38534556;rs39023048;rs50378197;rs36267659;rs32492875;rs31232197;rs46783773;rs32296887;rs31449642;rs32939481;rs31236409;rs31690069;rs48848336;rs32233442;rs49184954;rs32328305;rs32537380;rs13479268;rs32424606;rs6295848;rs227921453;rs13479276;rs31561885;rs48647025
chr1_16890.2	chr1:184889367-184889617	Distal Intergenic		C130074G19Rik	3.93207	7	45.3235	12.4243	51.5042	87221331	26964502	104239041	No baseline effect	Protected effect	16	16	15	15	rs32267337	rs31988344;rs37287696;rs13479163;rs39775784;rs32219787;rs31793211;rs46477628;rs32185835;rs47734376;rs32524656;rs31691249;rs47206075;rs46476185;rs32501401;rs46107184;rs52305240;rs31940507;rs32012050;rs37208863;rs31512362;rs31561779;rs32477373;rs32067315;rs47488275;rs46107226;rs32555260;rs31736746;rs32561437;rs250232227;rs31623270;rs32569368;rs32567376;rs24886524;rs223788707;rs32586510;rs31370895;r…
chr1_16939.2	chr1:184998991-184999241	Promoter (<=1kb)	dELS	Mark1	3.81178	X	11.9021	10.6826	12.9399	47144891	42981911	47876770	Significant in baseline	No effect	21	21	7	7	rs48061142	rs33872015;rs48061142;rs13483736;rs243465961;rs30129291;rs13483737
chr1_16953.1	chr1:185177730-185177980	Distal Intergenic		Rab3gap2	4.36167	1	87.3323	23.6789	88.8768	185177962	41290131	186237051	Significant in baseline	No effect	24	24	7	7	rs6154379	rs13475829;rs52625624;rs48741666;rs30667783;rs29552839;rs29633641;rs31864177;rs13475833;rs33275490;rs3714219;rs32671223;rs33392587;rs52628759;rs31652254;rs32044299;rs31012703;rs33444638;rs33447118;rs33447121;rs47782085;rs50434840;rs30761526;rs31572802;rs31555041;rs31885358;rs31983590;rs33586566;rs31954469;rs6321959;rs6322563;rs31612433;rs31745317;rs32434528;rs32093536;rs31325347;rs32602884;rs3220…
chr1_16961.2	chr1:185199350-185199600	Distal Intergenic		Rab3gap2	4.1162	18	43.0086	40.4294	44.8177	68603409	68185097	70159002	Significant in baseline	Protected effect	21	21	9	9	rs38772382	rs29967647;rs29539715;rs30216358;rs6346101;rs29984158;rs38772382;rs36370782;rs38013414;rs3718618;rs50446650;rs30108189;rs29679218;rs13483426;rs50596970
chr1_16977.2	chr1:185239053-185239303	Intron (ENSMUST00000194740.5/98732, intron 8 of 34)		Snora36b	3.85822	1	87.3323	41.8452	89.9025	185177962	78233988	187463427	Significant in baseline	No effect	24	24	7	7	rs6154379	rs47192472;rs45948170;rs46070989;rs47823509;rs30156746;rs232937166;rs31612855;rs236370277;rs30205785;rs13475954;rs32668634;rs13475957;rs32358097;rs3678377;rs30804641;rs31929413;rs219816352;rs50310397;rs32104666;rs51130709;rs13475967;rs48766014;rs6234856;rs46281379;rs47858597;rs30307999;rs13475970;rs30341693;rs30337529;rs30330393;rs50175543;rs45885174;rs52508722;rs13475979;rs13475980;rs33082518;rs…
chr1_16987.3	chr1:185253006-185253256	Intron (ENSMUST00000194740.5/98732, intron 17 of 34)	dELS	Mir664	3.81362	17	9.97	7.95848	10.2684	21686210	10720847	21690414	Significant in baseline	No effect	18	18	12	12	rs52562350	rs33397317;rs29500073;rs33393386;rs46339515;rs33183615;rs49702852;rs33169172;rs108375027;rs33518122;rs3662820;rs33637088;rs33220795;rs30924502;rs29499971;rs3654149;rs51863865;rs6181074;rs33314464;rs16783619;rs31589117;rs52562350;rs31862018;rs31423591
chr1_16992.3	chr1:185263743-185263993	Promoter (<=1kb)		Rab3gap2	7.55046	1	87.205	87.205	87.8531	184909869	184909869	185790793	Significant in baseline	No effect	24	24	7	7	rs33828269	rs33828269;rs49916193;rs6154379;rs30908228;rs259343497
chr1_16992.4	chr1:185263993-185264243	Promoter (<=1kb)		Rab3gap2	7.90453	1	87.3323	87.205	87.8531	185177962	184909869	185790793	Significant in baseline	No effect	24	24	7	7	rs6154379	rs33828269;rs49916193;rs6154379;rs30908228;rs259343497
chr1_17054.1	chr1:185458343-185458593	Promoter (2-3kb)		Gm2061	5.75885	1	89.5188	88.1095	89.9025	187053680	185849378	187463427	Significant in baseline	No effect	22	22	9	9	rs31639995	rs32850226;rs32516008;rs13476286;rs32287507;rs225810346;rs13476288;rs13476289;rs31553683;rs32765300;rs30819961;rs31639995;rs31963150;rs13476290;rs32930910;rs32940354
chr1_17082.1	chr1:185898479-185898729	Distal Intergenic	dELS	Lyplal1	4.15569	1	88.1095	24.8259	89.9025	185849378	42248208	187463427	Significant in baseline	Protected effect	22	22	9	9	rs32850226	rs3714219;rs32671223;rs33392587;rs52628759;rs31652254;rs32044299;rs31012703;rs33444638;rs33447118;rs33447121;rs47782085;rs50434840;rs30761526;rs31572802;rs31555041;rs31885358;rs31983590;rs33586566;rs31954469;rs6321959;rs6322563;rs31612433;rs31745317;rs32434528;rs32093536;rs31325347;rs32602884;rs32209957;rs32662962;rs31517020;rs31565873;rs13475872;rs32434080;rs33840699;rs51350456;rs47870456;rs2959…
chr1_17160.3	chr1:187031920-187032170	Distal Intergenic	DNase-H3K4me3,CTCF-bound	D1Pas1	3.61904	19	46.0105	43.5386	47.3107	52073823	49483196	52801833	Significant in baseline	Protected effect	17	17	14	14	rs30609819	rs13483657;rs46278490;rs30549756;rs36414899;rs13483666;rs30414236;rs38637479;rs31209562;rs30546813;rs30452468;rs3660073;rs13483668;rs30447436;rs30609819;rs13483669;rs30371958;rs30414771;rs36776978;rs30899519
chr1_17167.2	chr1:187100712-187100962	Intron (ENSMUST00000183819.7/74717, intron 8 of 10)		Gm15509	5.70245	1	89.9025	89.004	90.9222	187463427	186809682	188263219	Significant in baseline	No effect	22	22	9	9	rs32940354	rs31553683;rs32765300;rs30819961;rs31639995;rs31963150;rs13476290;rs32930910;rs32940354;rs32943482;rs31574365;rs31842689;rs46826113;rs48848476;rs32769253;rs52611989;rs32676547;rs3666905;rs30555925;rs13476293
chr1_1723.4	chr1:34459910-34460160	Promoter (<=1kb)	dELS; dELS,CTCF-bound	Ptpn18	4.28635	1	30.8342	27.4066	32.7764	54091078	46868702	58115573	Significant in baseline	No effect	13	13	18	18	rs32434080	rs6321959;rs6322563;rs31612433;rs31745317;rs32434528;rs32093536;rs31325347;rs32602884;rs32209957;rs32662962;rs31517020;rs31565873;rs13475872;rs32434080;rs33840699;rs51350456;rs47870456;rs29596070;rs13475876;rs32516530;rs13475879;rs29655680
chr1_17265.2	chr1:188468539-188468789	Intron (ENSMUST00000060479.13/22283, intron 20 of 70)	dELS,CTCF-bound	Ush2a	7.47611	1	89.004	88.6204	89.9025	186809682	186206758	187463427	Significant in baseline	No effect	22	22	9	9	rs31553683	rs225810346;rs13476288;rs13476289;rs31553683;rs32765300;rs30819961;rs31639995;rs31963150;rs13476290;rs32930910;rs32940354
chr1_1728.2	chr1:34485606-34485856	Exon (ENSMUST00000188292.6/ENSMUST00000188292.6, exon 1 of 5)	dELS,CTCF-bound; pELS	Prss39	4.07876	1	17.5929	17.084	25.8759	34951753	32343834	43444074	Significant in baseline	No effect	19	19	12	12	rs221967485	rs30598074;rs13475795;rs30849932;rs46323879;rs31518908;rs31710287;rs16808053;rs221967485;rs47717565;rs13475808;rs30604008;rs30525912;rs13475810;rs13475816;rs32180312;rs31935537;rs32551229;rs32942136;rs32635513;rs3705697;Affy_10345622;Affy_5433680;rs32988364;rs31528685;rs30611861;rs31574517;rs30868358;rs31440687;rs51951745;rs31449667;rs33132305;rs30551147;rs13475821;rs36367128;rs32764284;rs3714741…
chr1_1728.3	chr1:34485856-34486106	Exon (ENSMUST00000186117.1/ENSMUST00000186117.1, exon 1 of 4)	dELS,CTCF-bound	Prss39	4.71373	1	20.0322	17.4657	21.5707	38477112	34536447	39521927	Significant in baseline	No effect	18	18	13	13	rs30611861	rs31710287;rs16808053;rs221967485;rs47717565;rs13475808;rs30604008;rs30525912;rs13475810;rs13475816;rs32180312;rs31935537;rs32551229;rs32942136;rs32635513;rs3705697;Affy_10345622;Affy_5433680;rs32988364;rs31528685;rs30611861;rs31574517;rs30868358;rs31440687;rs51951745;rs31449667;rs33132305;rs30551147;rs13475821
chr1_1734.1	chr1:34520608-34520858	Distal Intergenic		Cfc1	5.29779	1	17.9746	17.4657	19.2669	35723979	34536447	37710746	Significant in baseline	No effect	20	20	11	11	rs30604008	rs31710287;rs16808053;rs221967485;rs47717565;rs13475808;rs30604008;rs30525912;rs13475810;rs13475816;rs32180312;rs31935537;rs32551229;rs32942136;rs32635513
chr1_1738.2	chr1:34571399-34571649	Distal Intergenic		Amer3	4.57373	1	19.7778	17.4657	21.5707	38225635	34536447	39521927	Significant in baseline	Down effect	18	18	13	13	rs32988364	rs31710287;rs16808053;rs221967485;rs47717565;rs13475808;rs30604008;rs30525912;rs13475810;rs13475816;rs32180312;rs31935537;rs32551229;rs32942136;rs32635513;rs3705697;Affy_10345622;Affy_5433680;rs32988364;rs31528685;rs30611861;rs31574517;rs30868358;rs31440687;rs51951745;rs31449667;rs33132305;rs30551147;rs13475821
chr1_17394.1	chr1:189633720-189633970	Distal Intergenic		Cenpf	3.35855	17	9.24859	8.47931	18.1465	12315222	11565211	40571110	Significant in baseline	Protected effect	18	18	13	13	rs3662820	rs33393386;rs46339515;rs33183615;rs49702852;rs33169172;rs108375027;rs33518122;rs3662820;rs33637088;rs33220795;rs30924502;rs29499971;rs3654149;rs51863865;rs6181074;rs33314464;rs16783619;rs31589117;rs52562350;rs31862018;rs31423591;rs32518416;rs32170136;rs33864009;rs33668338;rs33570052;rs33641175;rs51376412;rs52488232;rs3659741;rs13459150;rs33464875;rs29536256;rs33317604;rs33130037;rs33216711;rs5192…
chr1_1740.8	chr1:34585139-34585389	Intron (ENSMUST00000052670.10/211383, intron 1 of 1)	dELS	Amer3	4.69892	1	17.4657	16.0088	20.1595	34536447	32082234	39020746	Significant in baseline	Protected effect	19	19	12	12	rs31710287	rs32760971;rs31818207;rs30598074;rs13475795;rs30849932;rs46323879;rs31518908;rs31710287;rs16808053;rs221967485;rs47717565;rs13475808;rs30604008;rs30525912;rs13475810;rs13475816;rs32180312;rs31935537;rs32551229;rs32942136;rs32635513;rs3705697;Affy_10345622;Affy_5433680;rs32988364;rs31528685;rs30611861;rs31574517;rs30868358
chr1_17447.3	chr1:189879625-189879875	Promoter (2-3kb)		Smyd2	3.97252	1	93.499	92.8648	94.6598	191001481	189361953	191978902	Significant in baseline	No effect	23	23	6	6	rs31813445	rs30604277;rs3675669;rs30553311;rs32180871;rs32051408;rs31378221;rs32133051;rs31813445;rs6210519;rs33836586;rs31002906;rs30600086;rs8253327;rs49775781;rs31784615;rs48016635
chr1_17449.2	chr1:189887545-189887795	Promoter (1-2kb)	dELS,CTCF-bound	Smyd2	4.19829	6	15.2656	13.1516	15.5201	32207574	28715963	32302244	Significant in baseline	No effect	15	15	16	16	rs30162995	rs30764547;rs29605219;rs29618131;rs29650874;rs13478687;rs52571055;rs29973656;rs13478690;rs30718075;rs30114467;rs30162995;rs29966306;rs13478694
chr1_17455.2	chr1:189894186-189894436	Intron (ENSMUST00000027897.7/226830, intron 5 of 11)		Smyd2	4.03514	1	93.499	52.23	94.6598	191001481	98793301	191978902	Significant in baseline	No effect	23	23	6	6	rs31813445	rs31666743;rs32261404;rs37486156;rs36618375;rs13476012;rs30966514;rs51210174;rs13476025;rs31806216;rs13476030;rs32565357;rs32697536;rs30506144;rs30488981;rs30487561;rs30484039;rs47647099;rs49762567;rs3680216;rs31994637;rs31960226;rs32738873;rs31744083;rs47329570;rs31960159;rs13476045;rs45843892;rs31935680;rs3685919;rs6319405;rs3710646;rs30584583;rs51800183;rs48823920;rs30719160;rs31471077;rs30675…
chr1_1748.1	chr1:34654112-34654362	Distal Intergenic		AA619741	6.51606	1	17.5929	17.4657	17.9746	34951753	34536447	35723979	Significant in baseline	No effect	19	19	12	12	rs221967485	rs31710287;rs16808053;rs221967485;rs47717565;rs13475808;rs30604008
chr1_1748.1	chr1:34654112-34654362	Distal Intergenic		AA619741	5.26222	1	19.1397	18.3563	20.4159	37685650	37632448	39140420	Significant in baseline	No effect	20	20	11	11	rs32942136	rs32180312;rs31935537;rs32551229;rs32942136;rs32635513;rs3705697;Affy_10345622;Affy_5433680;rs32988364;rs31528685;rs30611861;rs31574517;rs30868358;rs31440687
chr1_1748.2	chr1:34654362-34654612	Distal Intergenic		AA619741	7.55558	1	17.8474	17.4657	18.1018	35538546	34536447	35935430	Significant in baseline	No effect	19	19	12	12	rs13475808	rs31710287;rs16808053;rs221967485;rs47717565;rs13475808;rs30604008;rs30525912
chr1_1748.2	chr1:34654362-34654612	Distal Intergenic		AA619741	6.95386	1	20.0322	18.3563	20.1595	38477112	37632448	39020746	Significant in baseline	No effect	18	18	13	13	rs30611861	rs32180312;rs31935537;rs32551229;rs32942136;rs32635513;rs3705697;Affy_10345622;Affy_5433680;rs32988364;rs31528685;rs30611861;rs31574517;rs30868358
chr1_17495.3	chr1:190175209-190175459	Intron (ENSMUST00000110279.3/102632463, intron 1 of 1)	pELS	Prox1	3.78005	4	36.7361	35.7044	37.5298	102851020	96896949	103634906	Significant in baseline	Up effect	5	5	26	26	rs28181732	rs28138719;rs28138717;rs32671645;rs32346380;rs13477866;rs13477873;rs28181732;rs28186732
chr1_17497.1	chr1:190250426-190250676	Distal Intergenic		Prox1	4.16626	1	94.4034	92.9921	94.6598	191969842	189806053	191978902	Significant in baseline	No effect	21	21	10	10	rs31784615	rs3675669;rs30553311;rs32180871;rs32051408;rs31378221;rs32133051;rs31813445;rs6210519;rs33836586;rs31002906;rs30600086;rs8253327;rs49775781;rs31784615;rs48016635
chr1_17659.3	chr1:190978346-190978596	Promoter (<=1kb)	dELS	Vash2	3.95539	7	47.9241	47.4033	48.3058	92545195	91094474	93498424	Significant in baseline	No effect	17	17	14	14	rs32510496	rs31349093;rs31709999;rs32510496;rs31238492;rs31093558;rs4226783;rs31732570;rs36361468
chr1_17684.2	chr1:191102936-191103186	Promoter (2-3kb)	dELS	Batf3	6.22441	1	93.499	92.9921	93.7613	191001481	189806053	191333382	Significant in baseline	Protected effect	23	23	6	6	rs31813445	rs3675669;rs30553311;rs32180871;rs32051408;rs31378221;rs32133051;rs31813445;rs6210519
chr1_17690.4	chr1:191115613-191115863	Distal Intergenic	dELS	Batf3	3.88675	1	93.1193	92.8648	93.7613	189994733	189361953	191333382	Significant in baseline	No effect	25	25	6	6	rs32180871	rs30604277;rs3675669;rs30553311;rs32180871;rs32051408;rs31378221;rs32133051;rs31813445;rs6210519
chr1_17706.9	chr1:191225337-191225587	Promoter (<=1kb)	pELS,CTCF-bound	D730003I15Rik	3.86987	18	19.149	17.7578	24.8773	39809358	38156425	56037647	Significant in baseline	No effect	11	11	19	19	rs29878134	rs31743172;rs29575950;rs30270060;rs31721232;rs13483310;rs31720381;rs29625610;rs29918934;rs49425485;rs51242592;rs29833039;rs6393110;rs29584462;rs29878134;rs29774579;rs13483314;rs50813675;rs49650054;rs3683264;rs29868350;rs29874243;rs49948966;rs243630124;rs13483328;rs31925045;rs6355722;rs29979159;rs29999629;rs29672459;rs237536737;rs3716758;rs29678518;rs30180395;rs29720204;rs29861737;rs29584951;rs295…
chr1_17762.2	chr1:191349310-191349560	Intron (ENSMUST00000027940.5/66950, intron 7 of 7)	dELS	Ppp2r5a	3.83763	9	65	61.4236	69.1133	119286156	118000000	121141506	Significant in baseline	No effect	9	9	12	12	rs47073848	Affy_PC9_118;rs47073848;rs33759597;rs8254361;rs29782719;rs48652143;rs30075728;rs48800052;rs260028548;rs29991797;rs33728841;rs13480455;rs4136213
chr1_17808.2	chr1:191540781-191541031	3' UTR		Dtl	3.76402	3	63.6048	49.9066	76.7176	141733523	121852558	158396394	Significant in baseline	No effect	19	19	12	12	rs31085126	rs48125590;rs46047885;rs31182788;rs31000962;rs30673791;rs47914673;rs50963474;rs30467523;rs30472785;rs30470586;rs3671119;rs49131857;rs45700995;rs3670168;rs13477397;rs31738289;rs30548532;rs30504375;rs37569935;rs31332466;rs30601881;rs30607904;rs30507350;rs30261132;UNC030323436;rs4221957;rs51819976;rs258043401;rs30746899;rs36492184;rs31146935;rs31152902;rs51430784;rs30682544;rs30689880;rs30162637;rs1…
chr1_17835.2	chr1:191641780-191642030	Distal Intergenic		Ints7	3.62187	16	28.2494	20.7545	38.4358	51096759	33696029	72576630	No baseline effect	No effect	15	15	16	16	rs4186333	rs32606324;rs4171597;rs4171718;rs4171788;rs4171932;rs51179286;rs49287973;rs4172672;rs4172693;rs4173102;rs37571967;rs52698661;rs4173870;rs4173882;rs32997254;rs4174492;rs51745127;rs4174508;rs4175398;D16Mit12;rs4176333;rs4176590;rs4176981;UNC160211952;rs4177501;rs4177853;rs4177946;rs4177951;rs4178505;rs4178971;rs4178975;rs4179355;rs4179445;rs4179484;rs4179504;rs6282770;rs4180247;rs50202656;rs4181679…
chr1_17857.1	chr1:191796324-191796574	Distal Intergenic	dELS	Nek2	5.30519	1	93.8886	93.7613	94.2762	191601182	191333382	191908118	Significant in baseline	No effect	22	22	9	9	rs31002906	rs6210519;rs33836586;rs31002906;rs30600086;rs8253327
chr1_17857.2	chr1:191796574-191796824	Distal Intergenic	dELS	Nek2	5.85935	1	93.8886	93.8886	94.2762	191601182	191601182	191908118	Significant in baseline	No effect	22	22	9	9	rs31002906	rs31002906;rs30600086;rs8253327
chr1_1786.2	chr1:34822681-34822931	Intron (ENSMUST00000185231.1/214469, intron 3 of 4)	dELS	Fam168b	3.98609	1	19.2669	14.0905	20.1595	37710746	25700998	39020746	Significant in baseline	Up effect	20	20	11	11	rs32635513	rs32249228;rs32331653;rs32086436;rs48222526;rs223334166;rs31670161;rs31134323;rs47868189;rs31600419;rs30514876;rs32110348;rs31590459;rs32372810;rs32684509;rs230225148;rs48664698;rs32760971;rs31818207;rs30598074;rs13475795;rs30849932;rs46323879;rs31518908;rs31710287;rs16808053;rs221967485;rs47717565;rs13475808;rs30604008;rs30525912;rs13475810;rs13475816;rs32180312;rs31935537;rs32551229;rs32942136;…
chr1_1786.3	chr1:34822931-34823181	Intron (ENSMUST00000185231.1/214469, intron 3 of 4)	dELS	Fam168b	5.40931	1	19.3941	17.9746	20.1595	37893971	35723979	39020746	Significant in baseline	No effect	19	19	12	12	Affy_10345622	rs30604008;rs30525912;rs13475810;rs13475816;rs32180312;rs31935537;rs32551229;rs32942136;rs32635513;rs3705697;Affy_10345622;Affy_5433680;rs32988364;rs31528685;rs30611861;rs31574517;rs30868358
chr1_17876.1	chr1:191829198-191829448	Promoter (2-3kb)	CTCF-only,CTCF-bound	Nek2	4.14366	10	3.4688	2.56629	57.9109	13687796	12954443	119970925	Significant in baseline	No effect	7	7	24	24	rs4228121	rs51822482;rs4228112;rs29374383;rs50339237;rs222208998;rs51867937;rs4228121;rs29362886;rs46563594;rs29323986;UNC100170236;rs4228126;rs49696478;rs51315292;rs49503966;rs49390525;rs29354370;rs36546146;rs36930194;rs29346715;rs3712394;rs45823507;rs29375085;rs13480522;rs46817080;rs29337958;rs29325816;rs49610151;rs29377349;rs3666392;rs29338689;rs50463337;rs48616011;rs29348289;rs29315269;rs29357601;rs293…
chr1_1790.2	chr1:34830574-34830824	Intron (ENSMUST00000185279.1/214469, intron 1 of 2)		Fam168b	3.88315	1	53.6334	52.3572	61.9643	106321454	99889757	132495600	Significant in baseline	No effect	20	20	11	11	rs30487561	rs37486156;rs36618375;rs13476012;rs30966514;rs51210174;rs13476025;rs31806216;rs13476030;rs32565357;rs32697536;rs30506144;rs30488981;rs30487561;rs30484039;rs47647099;rs49762567;rs3680216;rs31994637;rs31960226;rs32738873;rs31744083;rs47329570;rs31960159;rs13476045;rs45843892;rs31935680;rs3685919;rs6319405;rs3710646;rs30584583;rs51800183;rs48823920;rs30719160;rs31471077;rs30675648;rs32180662;rs30680…
chr1_1790.4	chr1:34831074-34831324	Intron (ENSMUST00000185279.1/214469, intron 1 of 2)	dELS	Fam168b	3.33582	1	17.8474	6.74282	25.8759	35538546	14753392	43444074	Significant in baseline	Protected effect	19	19	12	12	rs13475808	rs31574495;rs32016169;rs6291839;rs32105394;rs3088964;rs30752472;rs3678179;rs32109300;rs32127151;rs47275793;rs32039596;rs51394091;rs31817535;rs32171777;rs32043384;rs219716413;rs13475747;rs51820747;rs51700370;rs52118613;rs31772262;rs3670611;rs224386739;rs36660068;rs6404446;rs32101154;rs6253968;rs32315565;rs31766107;rs46856073;rs46249537;rs31949292;rs30499557;rs6316488;rs32400861;rs32597415;rs228543…
chr1_17900.3	chr1:191901208-191901458	Promoter (<=1kb)		1700034H15Rik	3.42599	6	19.4574	17.3394	20.6769	36747332	34195112	37652648	Significant in baseline	No effect	15	15	16	16	rs13478714	rs30318085;rs30421613;rs30602525;rs13478705;D6Mit268;rs30707684;rs45757075;rs30175616;rs13478714;rs30329380;rs244499093
chr1_17902.10	chr1:191907542-191907792	Promoter (<=1kb)	dELS,CTCF-bound	1700034H15Rik	4.30868	1	94.2762	92.9921	94.6598	191908118	189806053	191978902	Significant in baseline	No effect	22	22	9	9	rs8253327	rs3675669;rs30553311;rs32180871;rs32051408;rs31378221;rs32133051;rs31813445;rs6210519;rs33836586;rs31002906;rs30600086;rs8253327;rs49775781;rs31784615;rs48016635
chr1_17909.4	chr1:191928056-191928306	Distal Intergenic		1700034H15Rik	3.8037	9	4	0.920877	4.222	14410441	7785297	15889229	Significant in baseline	No effect	15	15	15	15	rs30289969	rs30410408;rs13480068;rs29840614;rs13480073;rs29645163;rs29976601;rs48489234;rs30289969;rs30180803
chr1_17912.2	chr1:191943343-191943593	Distal Intergenic		Rd3	3.643	2	92.546	91.3577	94.1649	173426500	172734804	173597301	Significant in baseline	No effect	15	15	13	13	rs27621324	rs33381117;rs27636820;rs46920619;rs27615350;rs27621324;rs27644551;rs27644503;rs27644500;rs6384888;rs27644412
chr1_17929.1	chr1:191983183-191983433	5' UTR		Rd3	3.83212	17	11.0376	10.7832	13.614	24290582	23185670	29303584	Significant in baseline	Protected effect	23	23	8	8	rs51376412	rs33668338;rs33570052;rs33641175;rs51376412;rs52488232;rs3659741;rs13459150;rs33464875;rs29536256;rs33317604;rs33130037;rs33216711;rs51921511;rs13482930;rs33669191;rs33621301;rs51683183;JAX00074732;rs6397584;rs46175605;rs13482934;UNCHS043985;UNC27739687;rs46183100;rs33319083
chr1_17937.4	chr1:192052558-192052808	Intron (ENSMUST00000085573.11/22033, intron 9 of 11)		Traf5	7.09604	1	94.6598	94.2762	94.6598	191978902	191908118	191978902	Significant in baseline	Protected effect	20	20	11	11	rs48016635	rs8253327;rs49775781;rs31784615;rs48016635
chr1_1795.4	chr1:34850475-34850725	Promoter (<=1kb)	pELS	Plekhb2	3.48161	14	31.024	24.9641	33.7565	78286799	68458130	83640636	No baseline effect	No effect	9	9	18	18	rs30565505	rs13482236;rs49029178;rs3089069;rs36930851;rs3654170;rs47284463;rs31266585;rs3723413;rs30111964;rs30843604;rs31098618;rs30154833;rs244723394;rs52601385;rs13482251;rs49092877;rs31155986;rs221790235;rs3701623;rs31352727;rs30592001;rs31344892;rs30404658;rs222585609;rs50267306;rs31357182;rs13482255;rs30763341;rs50473249;rs30640939;rs13482262;rs51257993;rs30565505;rs30678419;rs13482263;rs3665356;rs461…
chr1_17966.1	chr1:192183067-192183317	Distal Intergenic		Kcnh1	3.54256	1	94.787	14.0905	96.1944	192141559	25700998	194759288	Significant in baseline	No effect	21	21	10	10	rs30762235	rs32249228;rs32331653;rs32086436;rs48222526;rs223334166;rs31670161;rs31134323;rs47868189;rs31600419;rs30514876;rs32110348;rs31590459;rs32372810;rs32684509;rs230225148;rs48664698;rs32760971;rs31818207;rs30598074;rs13475795;rs30849932;rs46323879;rs31518908;rs31710287;rs16808053;rs221967485;rs47717565;rs13475808;rs30604008;rs30525912;rs13475810;rs13475816;rs32180312;rs31935537;rs32551229;rs32942136;…
chr1_18023.1	chr1:192320213-192320463	Intron (ENSMUST00000110844.2/16510, intron 6 of 10)		Kcnh1	3.80276	2	94.1649	25.4806	98.4467	173597301	51654309	178717320	Significant in baseline	No effect	16	16	15	15	rs27644412	rs33185243;rs27897848;rs29909943;rs33671001;rs13476499;rs29668627;rs33083288;rs27927606;rs27912607;rs27913440;rs13476503;rs47801450;rs27908481;rs6201706;rs6247544;rs29714894;rs3663027;rs27923118;rs48912331;rs48958172;rs13476520;rs3672719;rs27924920;rs13476526;rs13476531;rs29863279;rs28038082;rs32870391;rs28054403;rs33251754;rs52111367;rs28002412;rs6318340;rs28041963;rs28006671;rs28039503;rs370971…
chr1_18039.2	chr1:192346085-192346335	Intron (ENSMUST00000078470.11/16510, intron 7 of 10)		Kcnh1	3.85079	10	65.3833	64.618	66.8275	127331244	127003427	127742453	Significant in baseline	No effect	19	19	11	11	rs4228523	rs13480819;rs265719890;rs29320371;rs33849430;rs50853180;rs215991852;rs29365892;rs236754101;rs4228523;rs49753574;rs29349118;rs263217390;rs29358519;rs29383570;rs29317988;rs13480822
chr1_18051.2	chr1:192366302-192366552	Intron (ENSMUST00000078470.11/16510, intron 7 of 10)		Kcnh1	4.25845	9	19.8364	18.8146	20.22	47039977	45693319	47625185	Significant in baseline	No effect	13	13	18	18	rs32681907	rs29743829;rs29740169;rs29983887;rs50472876;rs29693744;rs29792735;rs48329073;rs52258400;rs33749941;rs29980498;rs32678869;rs32681907;rs32708297;rs30229691;rs29876068;rs46126800
chr1_18086.2	chr1:192442999-192443249	Intron (ENSMUST00000078470.11/16510, intron 10 of 10)	dELS	Kcnh1	4.24143	10	65.1288	63.301	65.3833	127257838	126735429	127331244	Significant in baseline	No effect	19	19	12	12	rs50853180	rs29370407;rs29369583;rs36661093;rs29382245;rs37486213;rs13480819;rs265719890;rs29320371;rs33849430;rs50853180;rs215991852;rs29365892;rs236754101;rs4228523
chr1_18109.10	chr1:192490011-192490261	Intron (ENSMUST00000078470.11/16510, intron 10 of 10)		Kcnh1	4.16858	1	94.499	94.4034	96.1944	191969842	191969842	194759288	Significant in baseline	No effect	20	20	10	10	rs31784615	rs31784615;rs48016635;rs52191121;rs30762235;rs50259858;rs30997318;rs33068074;rs32793860;rs13500420;rs30897483;rs13476310;rs31478915;rs33174703;rs30453157;rs32271175;rs13476313;rs45997766;rs32662997
chr1_18109.7	chr1:192489261-192489511	Intron (ENSMUST00000078470.11/16510, intron 10 of 10)		Kcnh1	3.58834	18	35.149	31.3596	39.6621	62994019	60000000	66630118	Significant in baseline	No effect	11	11	15	15	Affy_4809913	Affy_PC18_60;Affy_PC18_61;Affy_PC18_62;Affy_4809913;rs29557439;rs13483407;rs29775877;rs45932736;rs3658391;rs46094763;rs29770804;rs49823091;rs52714787
chr1_18197.6	chr1:192829443-192829693	Distal Intergenic		A730013G03Rik	4.02434	6	17.3394	15.5201	17.3394	34195112	32302244	34195112	Significant in baseline	No effect	18	18	13	13	rs30318085	rs13478694;rs30468068;rs30319084;rs3678887;rs3693410;rs30654706;rs47901097;rs49265509;rs29960521;rs50136596;rs30318085
chr1_18199.3	chr1:192833734-192833984	Promoter (<=1kb)	pELS	A730013G03Rik	4.04103	7	44.6854	40.9581	54.2056	84149847	74522856	111680092	Significant in baseline	No effect	15	15	16	16	rs31476858	rs31807959;rs32310436;rs48673245;rs13479342;rs31904664;rs32320379;rs37128329;rs36796772;rs13479357;rs30658482;rs30697654;rs32420959;rs31605113;rs31097116;rs50038484;rs3710335;rs51893868;rs31249947;rs3656205;rs49655905;rs31675380;rs242958203;rs31690692;rs32426322;rs31090613;rs46378974;rs31432603;rs222296438;rs32499101;rs31435342;rs31416354;rs31476858;rs32066094;rs6278282;rs31521374;rs37626662;rs31…
chr1_18232.5	chr1:193090645-193090895	Distal Intergenic	dELS	Utp25	4.04918	6	14.342	13.1516	15.0092	29070749	28715963	31426693	Significant in baseline	Protected effect	14	14	17	17	rs29605219	rs30764547;rs29605219;rs29618131;rs29650874;rs13478687;rs52571055;rs29973656;rs13478690;rs30718075
chr1_1825.2	chr1:35201274-35201524	Distal Intergenic	dELS	Plekhb2	4.10042	2	94.1649	93.7813	98.4467	173597301	173549576	178717320	Significant in baseline	Up effect	16	16	15	15	rs27644412	rs27644503;rs27644500;rs6384888;rs27644412;rs33360234;Affy_PC2_176;rs3674193
chr1_18251.1	chr1:193127389-193127639	Promoter (<=1kb)		Utp25	3.74377	12	14.4443	13.1582	17.6632	36075170	34603643	44907990	Significant in baseline	No effect	22	22	9	9	rs214210924	rs50120872;rs6344483;rs13481388;rs13481389;rs29177195;rs50249332;rs29207200;rs13481390;Affy_4739375;rs29137914;rs50311227;rs214210924;rs29138639;rs29161112;rs29210118;rs29142392;rs13481398;rs29212789;rs13481399;rs29164635;rs29157777;rs52188869;rs29159630;rs13481406;rs13481409;rs29124638;rs13481410;rs254687442;rs50979658;rs46705481;rs13481414;rs29222913;rs29207061;rs50577164;rs3716646;rs29124466;r…
chr1_18256.1	chr1:193150930-193151180	Promoter (1-2kb)		Irf6	4.73473	1	95.4232	94.6598	96.1944	193481242	191978902	194759288	Significant in baseline	No effect	20	20	11	11	rs31478915	rs48016635;rs52191121;rs30762235;rs50259858;rs30997318;rs33068074;rs32793860;rs13500420;rs30897483;rs13476310;rs31478915;rs33174703;rs30453157;rs32271175;rs13476313;rs45997766;rs32662997
chr1_18256.1	chr1:193150930-193151180	Promoter (1-2kb)		Irf6	3.9624	13	23.6847	1.86923	23.9411	54844925	7000000	54879087	Significant in baseline	No effect	7	7	22	22	rs29612467	Affy_PC13_7;Affy_4995717etal;rs13459139;rs29224209;UNC130018533;rs3701757;rs49627996;rs46244625;rs48202517;rs29492745;rs49704713;rs47101935;rs3693929;rs13481714;rs29774984;rs6345767;rs45962545;rs36429966;rs33846187;rs3714148;rs29239338;rs3676630;rs29721138;rs29784250;rs29231142;rs46335003;rs13481728;rs29247416;Agi_P180140;Affy_PC13_25;rs29726315;rs13481734;Affy_PC13_29;rs29985658;rs29819253;rs295…
chr1_18256.2	chr1:193151180-193151430	Promoter (1-2kb)		Irf6	7.04298	1	95.4232	95.4232	96.1944	193481242	193481242	194759288	Significant in baseline	Protected effect	20	20	11	11	rs31478915	rs31478915;rs33174703;rs30453157;rs32271175;rs13476313;rs45997766;rs32662997
chr1_18261.8	chr1:193174106-193174356	Promoter (<=1kb)	pELS	A130010J15Rik	3.79952	16	53.8019	47.7705	57.4343	96348925	88032783	97368149	Significant in baseline	No effect	16	16	15	15	rs3166062	rs4214924;rs4214933;rs50997347;rs4215932;rs4216465;rs4216581;rs33540596;rs258510349;rs4217061;rs4217127;rs4217168;rs33523967;rs4217306;rs46569595;rs4218925;rs4219039;rs50812055;rs4219239;rs4219613;rs4219893;rs4219897;rs4219905;rs4219948;rs3712360;rs6389547;rs4220193;rs3148854;rs3143674;rs3166062;rs3166178;rs4221305;rs50983737;rs4221572
chr1_18278.1	chr1:193227668-193227892	Intron (ENSMUST00000194677.5/16780, intron 1 of 26)	dELS	Hsd11b1	3.72488	11	46.9508	40.9726	61.4947	88503854	79252230	106666300	Significant in baseline	No effect	18	18	12	12	UNCHS031776	rs13481117;rs13481119;Affy_PC_Suz12;Affy_PC_Myo1d;rs29431896;rs28207497;rs51375319;rs28191186;rs28190476;rs50136661;rs28190289;rs13481128;rs26980614;rs29417944;rs29475495;UNC20066219;UNCHS031771;UNCHS031776;UNCHS031777;UNCHS031779;JAX00030117;rs3659504;UNCHS031791;UNC20082690;D11Mit41;UNC20090917;rs3697441;UNC20091679;UNCHS031808;UNC20093627;JAX00030197;rs13481150;rs51608748;rs13481152;rs27076650…
chr1_18286.3	chr1:193256325-193256575	Intron (ENSMUST00000194677.5/16780, intron 1 of 26)		Hsd11b1	3.82612	9	55.963	14.5945	72.1096	110638061	35212457	124124454	Significant in baseline	No effect	13	13	18	18	rs30042960	rs30437276;rs29632691;rs29743771;rs29878586;rs30136672;rs51585998;rs264361605;rs51361016;rs52408413;rs13480151;rs30132525;rs37429415;rs29646104;rs36424704;rs33737439;rs47317817;rs37272315;rs48351834;rs47739724;rs48968649;rs46383063;rs30028211;rs3691383;rs37428431;rs50557392;rs30523397;rs37998092;rs29835596;rs48176249;rs30044052;rs30422229;rs46688986;rs30092176;rs30337279;rs30137947;rs32611336;rs2…
chr1_18314.21	chr1:193351476-193351726	Intron (ENSMUST00000169907.7/215303, intron 7 of 11)		Camk1g	3.60597	7	9.826	7.90564	40.5705	24937916	23789532	74340806	Significant in baseline	Protected effect	18	18	6	6	rs13479153	rs46067640;rs49693858;rs31572894;rs31153518;Affy_4916353;rs13479153;rs51415723;rs8240817;rs49329686;rs31966575;rs36536360;rs31988344;rs37287696;rs13479163;rs39775784;rs32219787;rs31793211;rs46477628;rs32185835;rs47734376;rs32524656;rs31691249;rs47206075;rs46476185;rs32501401;rs46107184;rs52305240;rs31940507;rs32012050;rs37208863;rs31512362;rs31561779;rs32477373;rs32067315;rs47488275;rs46107226;rs…
chr1_18316.2	chr1:193360995-193361245	Promoter (1-2kb)		Camk1g	4.43885	1	95.2959	94.787	96.1944	192941983	192141559	194759288	Significant in baseline	Protected effect	21	21	10	10	rs30897483	rs30762235;rs50259858;rs30997318;rs33068074;rs32793860;rs13500420;rs30897483;rs13476310;rs31478915;rs33174703;rs30453157;rs32271175;rs13476313;rs45997766;rs32662997
chr1_18316.6	chr1:193361995-193362245	Promoter (2-3kb)		Camk1g	3.7302	1	94.499	93.7613	96.1944	191969842	191333382	194759288	Significant in baseline	Protected effect	20	20	10	10	rs31784615	rs6210519;rs33836586;rs31002906;rs30600086;rs8253327;rs49775781;rs31784615;rs48016635;rs52191121;rs30762235;rs50259858;rs30997318;rs33068074;rs32793860;rs13500420;rs30897483;rs13476310;rs31478915;rs33174703;rs30453157;rs32271175;rs13476313;rs45997766;rs32662997
chr1_18336.1	chr1:193422857-193423107	Distal Intergenic		Camk1g	5.1171	1	96.1944	95.4232	96.1944	194759288	193481242	194759288	Significant in baseline	No effect	20	20	11	11	rs32662997	rs31478915;rs33174703;rs30453157;rs32271175;rs13476313;rs45997766;rs32662997
chr1_18345.4	chr1:193503937-193504187	Distal Intergenic	dELS,CTCF-bound	Mir205	4.11033	1	14.499	3.16082	17.084	27306300	5025197	32343834	Significant in baseline	No effect	16	16	14	14	rs223334166	rs30847416;rs32759286;rs31625087;rs31716357;rs3677817;rs47937185;rs32140280;rs32096391;rs47493511;rs31190522;rs6298633;rs31362910;rs31878990;rs32186775;rs31868650;rs6360236;rs32740138;rs249962268_D1Mit1;rs30991578;rs32347261;rs36585555;rs30477285;rs32223513;rs45688852;rs48988706;rs31710291;rs31794283;rs6296049;rs32381514;rs31577697;rs30996958;rs31574495;rs32016169;rs6291839;rs32105394;rs3088964;r…
chr1_18348.2	chr1:193510216-193510466	Promoter (2-3kb)	dELS	Mir205	3.96543	1	95.0415	14.0905	96.1944	192430302	25700998	194759288	Significant in baseline	No effect	21	21	10	10	rs33068074	rs32249228;rs32331653;rs32086436;rs48222526;rs223334166;rs31670161;rs31134323;rs47868189;rs31600419;rs30514876;rs32110348;rs31590459;rs32372810;rs32684509;rs230225148;rs48664698;rs32760971;rs31818207;rs30598074;rs13475795;rs30849932;rs46323879;rs31518908;rs31710287;rs16808053;rs221967485;rs47717565;rs13475808;rs30604008;rs30525912;rs13475810;rs13475816;rs32180312;rs31935537;rs32551229;rs32942136;…
chr1_18406.1	chr1:194563748-194563998	Distal Intergenic		Plxna2	4.52255	1	95.4232	94.6598	96.1944	193481242	191978902	194759288	Significant in baseline	No effect	20	20	11	11	rs31478915	rs48016635;rs52191121;rs30762235;rs50259858;rs30997318;rs33068074;rs32793860;rs13500420;rs30897483;rs13476310;rs31478915;rs33174703;rs30453157;rs32271175;rs13476313;rs45997766;rs32662997
chr1_18416.1	chr1:194618809-194619059	Promoter (<=1kb)	dELS,CTCF-bound	Plxna2	3.73026	14	47.1648	46.2542	49.8807	113614252	111030179	118462433	Significant in baseline	Protected effect	16	16	13	13	rs13482380	rs51819433;rs31529490;rs31053049;rs32583387;rs31011682;rs13482380;rs30386025;JAX00057651;rs259924538;rs51650625;rs3722416;rs30192076;rs3671398;rs30893914;rs6286809;rs3711767;rs30438807;rs30259301
chr1_18425.3	chr1:194644212-194644462	Promoter (<=1kb)		Plxna2	3.67896	18	11.1097	7.29701	13.3379	24162250	16294373	28296686	Significant in baseline	No effect	15	15	16	16	rs29974640	rs48697581;rs30259953;rs6358426;rs30270059;rs50406373;rs29868533;rs3707555;rs6387540;rs223212013;rs47650854;rs6164602;rs16792910;rs29568169;rs31307278;rs235520776;rs29726468;rs50830791;rs29775702;rs29724682;rs49756738;rs31506385;rs29974640;rs51187195;rs13483255;rs52584820;rs29575364;rs29576003;rs46153785;rs13483260;rs13483264;rs13483265;rs52333343;rs13483269
chr1_18469.1	chr1:194817978-194818228	Distal Intergenic		Mir3962	3.45919	11	12.4776	6.48033	14.4553	20802485	11682446	27337521	Significant in baseline	No effect	16	16	15	15	rs29468405	rs45864877;rs29420294;rs29385259;rs3659698;rs26847682;rs49943470;rs26834213;rs29390185;rs13480879;rs253718601;rs3673722;rs51041110;rs26861736;rs29457913;rs26851009;rs29385990;rs51923946;rs29450584;rs29449382;rs26851265;rs29389965;rs218648778;rs29464036;rs26859350;rs52161029;rs51345123;rs26831366;rs29387532;rs13480899;rs26840913;rs51279354;rs3723987;rs26829217;D11Mit79;rs26831217;rs13480901;rs2943…
chr1_18476.5	chr1:194880093-194880343	Distal Intergenic		Mir3962	4.06663	3	39.2302	37.1259	41.4346	100975596	93587177	105059546	Significant in baseline	Protected effect	9	9	22	22	D3Mit189	rs13477263;rs13477272;rs13477280;rs227691182;rs13477288;rs3159432;rs3162061;D3Mit189;rs30645832;rs6365379;rs13477294;rs31048985;rs30661719;rs30860082
chr1_18507.3	chr1:195037407-195037657	Promoter (<=1kb)		Mir29c	3.84839	1	71.9878	36.8399	74.0332	163093547	63144761	166983008	Significant in baseline	No effect	18	18	13	13	rs49476641	rs32416624;rs3703813;rs52470670;rs3162895;rs30173232;rs30465484;rs45845149;rs31727300;rs32848413;rs30230950;rs32347478;rs33859501;rs30993227;rs51246399;rs30297732;rs30284166;rs3722989;rs3665792;rs13475907;rs32080982;rs31292260;rs48130521;rs36768099;rs13475913;rs30948259;rs37034472;rs31200269;rs3687595;rs238728371;rs31428112;rs13475920;rs32184618;rs13475921;rs31377069;rs13475923;rs31890646;rs32117…
chr1_1903.3	chr1:35933874-35934124	Distal Intergenic		Hs6st1	4.19315	7	43.0016	38.9048	45.4507	82178629	72907530	87244659	Significant in baseline	No effect	16	16	15	15	rs32426322	rs31342575;rs31623161;rs31597771;rs31246895;rs13479334;UNC070318260;rs3691951;rs31985217;rs49704812;rs32052013;rs31223769;rs16793804;rs8268441;rs36604679;rs49388131;rs31807959;rs32310436;rs48673245;rs13479342;rs31904664;rs32320379;rs37128329;rs36796772;rs13479357;rs30658482;rs30697654;rs32420959;rs31605113;rs31097116;rs50038484;rs3710335;rs51893868;rs31249947;rs3656205;rs49655905;rs31675380;rs242…
chr1_1928.9	chr1:36089709-36089959	Intron (ENSMUST00000088174.3/50785, intron 1 of 1)	dELS	Hs6st1	3.89913	16	46.8496	15.4803	53.291	86457594	27062881	92999666	Significant in baseline	No effect	17	17	14	14	rs4213255	rs4165503;rs4165511;rs4165582;rs4165676;rs48975675;rs4166413;rs36773211;rs4167131;rs4167177;rs4167244;rs4169220;rs4169269;rs4169271;rs4170251;rs3676973;rs4170350;rs4170367;rs50955094;rs4170934;rs4171220;rs4171440;rs32606324;rs4171597;rs4171718;rs4171788;rs4171932;rs51179286;rs49287973;rs4172672;rs4172693;rs4173102;rs37571967;rs52698661;rs4173870;rs4173882;rs32997254;rs4174492;rs51745127;rs4174508…
chr1_194.1	chr1:9622378-9622628	Exon (ENSMUST00000088666.3/76982, exon 5 of 6)		2610203C22Rik	3.62976	1	2.499	1.499	4.8246	4846561	3010274	11083825	Significant in baseline	No effect	16	16	12	12	rs13470446	rs31443144;rs6269442;rs32285189;rs258367496;rs32430919;rs36251697;rs30658298;rs51852623;rs31879829;rs36742481;rs6365999;rs13470446;Affy_10344635;rs6376963;rs30847416;rs32759286;rs31625087;rs31716357;rs3677817;rs47937185;rs32140280;rs32096391;rs47493511;rs31190522;rs6298633;rs31362910;rs31878990;rs32186775;rs31868650;rs6360236
chr1_195.16	chr1:9630864-9631114	Promoter (<=1kb)	dELS	2610203C22Rik	3.5614	1	1.499	1.499	3.16082	3010274	3010274	5025197	Significant in baseline	No effect	18	18	13	13	rs31443144	rs31443144;rs6269442;rs32285189;rs258367496;rs32430919;rs36251697;rs30658298;rs51852623;rs31879829;rs36742481;rs6365999;rs13470446;Affy_10344635;rs6376963;rs30847416
[truncated: 15,701 more rows]

## Sheet: ATACxSD_QTL
regionID	region	Annotation	cCRE	gene	lod	chr	pos	ci_lo	ci_hi	bp	bp_lo	bp_hi	BSL_trend	SD_trend	BB	DD	snp	snps
[truncated: 24,836 more rows]

## Sheet: RNA_QTL
Gene	lod	chr	pos	ci_lo	ci_hi	bp	bp_lo	bp_hi	BSL_trend	SD_trend	BB_Ctrl	BB_SD	DD_Ctrl	DD_SD	snp	snps
[truncated: 3,858 more rows]

## Sheet: RNAxSD_QTL
Gene	lod	chr	pos	ci_lo	ci_hi	bp	bp_lo	bp_hi	BSL_trend	SD_trend	BB	DD	snp	snps
[truncated: 675 more rows]

## Sheet: TF_QTL
Motif_TF	lod	chr	pos	ci_lo	ci_hi	bp	bp_lo	bp_hi	BSL_trend	SD_trend	BB_Ctrl	BB_SD	DD_Ctrl	DD_SD	snp	snps
[truncated: 14 more rows]

## Sheet: TFxSD_QTL
Motif_TF	lod	chr	pos	ci_lo	ci_hi	bp	bp_lo	bp_hi	BSL_trend	SD_trend	BB	DD	snp	snps
[truncated: 64 more rows]

## Sheet: pheno_QTL
phenotype_ID	phenotype	description	comments	Labeled in figure as	heritability	lod	chr	pos	ci_lo	ci_hi	bp	bp_lo	bp_hi	test	BB	DD	snp	snps
[truncated: 144 more rows]

[truncated: 1 more sheets: QTL Peaks Overlaps]
