# Supplementary material
Source: Research Square preprint supplement (doi:10.21203/rs.3.rs-9589050/v1)
Supplement: Supplementary file 5 [file a333ad09891206b940028ac3.xlsx]

## Sheet: SD effect -Genotype Control
ENSEMBLE

## Sheet: SD effect -Tamoxifen Control
ENSEMBLE

## Sheet: SD effect -ciKO
ENSEMBLE

## Sheet: -Baseline- ciKO vs Genotype
ENSEMBLE

## Sheet: -Baseline- ciKO vs Tamoxifen
ENSEMBLE

## Sheet: -Interaction- SD x ciKO
ENSEMBLE

## Sheet: -Interaction- SD x Genotype
ENSEMBLE

## Sheet: -Interaction- SD x Tamoxifen
ENSEMBLE
