# Supplementary material
Source: Research Square preprint supplement (doi:10.21203/rs.3.rs-9589050/v1)
Supplement: Supplementary file 6 [file bc7ff7910f4603fa156257a7.xlsx]

## Sheet: RNA_GO
ONTOLOGY

## Sheet: ATAC_GO
ONTOLOGY

## Sheet: RNA_KEGG
ID

## Sheet: ATAC_KEGG
ID

## Sheet: Overlap
ID
