# Supplementary material
Source: Research Square preprint supplement (doi:10.21203/rs.3.rs-9589050/v1)
Supplement: Supplementary file 7 [file fafe3a8996d563c6a3423e0f.xlsx]

## Sheet: Sequencing_QC
Metric

## Sheet: Alignment_QC
Metric
